# Supplementary material for: The impact of Fulvestrant on Estrogen Receptor-Driven Chromatin Dynamics in Breast Cancer
Source: Research Square preprint supplement (doi:10.21203/rs.3.rs-6779056/v1), 2025-06-06
Supplement: Supplementary file 1 [file 08d5963d384c82ef3530a1ac.xlsx]

## Sheet: ER_CUT&Tag
Table S1: Differential analysis of ER and H3K27ac CUT&Tag data, including ER-centered H3K27ac
ER CUT&Tag data
Chr	Start	End	Strand	Classification	Comparison	logFC	FDR	Annotation	DistanceToTSS	ENSEMBL	SYMBOL	GENENAME
chr1	1000018	1000900	*	+ 2 fold & sig. in E2	E2 vs DMSO	1.39656456986888	0.00925227636965262	Promoter	0	ENSG00000188290	HES4	hes family bHLH transcription factor 4
chr1	10018400	10019155	*	+ 2 fold & sig. in E2	E2 vs DMSO	1.83406761896742	0.00130690106464528	Distal Intergenic	-13677	ENSG00000130939	UBE4B	ubiquitination factor E4B
chr1	10032446	10033715	*	+ 2 fold & sig. in E2	E2 vs DMSO	1.16255712321597	0.0125100304959137	Promoter	0	ENSG00000130939	UBE4B	ubiquitination factor E4B
chr1	100485625	100486478	*	+ 2 fold & sig. in E2	E2 vs DMSO	1.83169751257283	0.0438864966374336	3' UTR	-51661	ENSG00000181656	GPR88	G protein-coupled receptor 88
chr1	102833039	102833557	*	+ 2 fold & sig. in E2	E2 vs DMSO	2.07924889608017	0.00694311507711383	Intron (ENST00000414418.1/112268286, intron 1 of 6)	20285	NA	LOC112268286	uncharacterized LOC112268286
chr1	10398361	10399529	*	+ 2 fold & sig. in E2	E2 vs DMSO	1.07704785677054	0.0159602059197946	Promoter	0	ENSG00000142657	PGD	phosphogluconate dehydrogenase
chr1	1069180	1069444	*	+ 2 fold & sig. in E2	E2 vs DMSO	2.67975721141561	6.07679104878447e-10	Exon (ENST00000412397.2/100288175, exon 10 of 10)	4685	ENSG00000217801	LOC100288175	uncharacterized LOC100288175
chr1	107402045	107402558	*	+ 2 fold & sig. in E2	E2 vs DMSO	2.28867967751715	0.0344770033961255	Intron (ENST00000370073.6/22854, intron 4 of 7)	141242	ENSG00000162631	NTNG1	netrin G1
chr1	10751105	10752793	*	+ 2 fold & sig. in E2	E2 vs DMSO	2.2692574621015	5.80642235287314e-09	Intron (ENST00000377022.8/54897, intron 2 of 20)	43853	ENSG00000130940	CASZ1	castor zinc finger 1
chr1	107756321	107756868	*	+ 2 fold & sig. in E2	E2 vs DMSO	1.96747341761912	6.2278335635817e-05	Intron (ENST00000370056.9/10451, intron 11 of 26)	-6813	ENSG00000134215	VAV3	vav guanine nucleotide exchange factor 3
chr1	107767198	107767900	*	+ 2 fold & sig. in E2	E2 vs DMSO	2.83819259368607	2.86056072922532e-05	Intron (ENST00000370056.9/10451, intron 7 of 26)	-17690	ENSG00000134215	VAV3	vav guanine nucleotide exchange factor 3
chr1	108190769	108191616	*	+ 2 fold & sig. in E2	E2 vs DMSO	1.54597398317553	0.001592254180817	Intron (ENST00000565488.6/29957, intron 1 of 9)	1202	ENSG00000085491	SLC25A24	solute carrier family 25 member 24
chr1	108214751	108215067	*	+ 2 fold & sig. in E2	E2 vs DMSO	2.43894640631908	0.0236821509690782	Distal Intergenic	-14408	ENSG00000085491	SLC25A24	solute carrier family 25 member 24
chr1	108216510	108217451	*	+ 2 fold & sig. in E2	E2 vs DMSO	1.68434241434871	0.00729916290190954	Distal Intergenic	-16167	ENSG00000085491	SLC25A24	solute carrier family 25 member 24
chr1	108220621	108221058	*	+ 2 fold & sig. in E2	E2 vs DMSO	1.73757112441557	0.0288794724167758	Distal Intergenic	-20278	ENSG00000085491	SLC25A24	solute carrier family 25 member 24
chr1	108235234	108235782	*	+ 2 fold & sig. in E2	E2 vs DMSO	9.36181737549987	1.3352868082516e-08	Exon (ENST00000415641.8/148545, exon 9 of 15)	8294	ENSG00000196427	NBPF4	NBPF member 4
chr1	108327311	108328212	*	+ 2 fold & sig. in E2	E2 vs DMSO	3.10044885730998	1.23121389874767e-06	Intron (ENST00000411846.6/ENST00000411846.6, intron 2 of 5)	-53622	ENSG00000196427	NBPF4	NBPF member 4
chr1	108345977	108346549	*	+ 2 fold & sig. in E2	E2 vs DMSO	1.78053836054634	0.0144409785321227	Distal Intergenic	-72288	ENSG00000196427	NBPF4	NBPF member 4
chr1	108383096	108383801	*	+ 2 fold & sig. in E2	E2 vs DMSO	2.89873811904144	0.0046439515816262	Exon (ENST00000357046.4/ENST00000357046.4, exon 8 of 10)	-36888	ENSG00000186086	NBPF6	NBPF member 6
chr1	108458332	108459502	*	+ 2 fold & sig. in E2	E2 vs DMSO	4.47777640995258	1.17296520701162e-09	Exon (ENST00000370040.7/653149, exon 10 of 16)	7989	ENSG00000186086	NBPF6	NBPF member 6
chr1	108502949	108503597	*	+ 2 fold & sig. in E2	E2 vs DMSO	1.85077717066434	0.0208987628176177	Exon (ENST00000453250.1/ENST00000453250.1, exon 1 of 1)	52606	ENSG00000186086	NBPF6	NBPF member 6
chr1	108512468	108513366	*	+ 2 fold & sig. in E2	E2 vs DMSO	1.65898845435354	0.00670641101297008	Distal Intergenic	-46723	ENSG00000162636	FAM102B	family with sequence similarity 102 member B
chr1	108876632	108877403	*	+ 2 fold & sig. in E2	E2 vs DMSO	2.0338744938654	0.00838058455480618	Promoter	0	ENSG00000121957	GPSM2	G protein signaling modulator 2
chr1	109041421	109042454	*	+ 2 fold & sig. in E2	E2 vs DMSO	1.25791779411562	0.0317479153678484	Promoter	0	ENSG00000085433	WDR47	WD repeat domain 47
chr1	109137792	109138747	*	+ 2 fold & sig. in E2	E2 vs DMSO	3.48875703053438	6.05361355133095e-13	Intron (ENST00000533147.5/57535, intron 2 of 2)	-22859	ENSG00000116299	ELAPOR1	endosome-lysosome associated apoptosis and autophagy regulator 1
chr1	109149289	109149676	*	+ 2 fold & sig. in E2	E2 vs DMSO	2.33527585501876	1.03899005867869e-07	Intron (ENST00000533147.5/57535, intron 2 of 2)	-11930	ENSG00000116299	ELAPOR1	endosome-lysosome associated apoptosis and autophagy regulator 1
chr1	109168103	109168849	*	+ 2 fold & sig. in E2	E2 vs DMSO	1.4140853684326	0.00659322453704679	Intron (ENST00000531664.5/57535, intron 4 of 4)	6497	ENSG00000116299	ELAPOR1	endosome-lysosome associated apoptosis and autophagy regulator 1
chr1	109180926	109182079	*	+ 2 fold & sig. in E2	E2 vs DMSO	1.00492172925769	0.0433211363280305	Intron (ENST00000457623.6/57535, intron 6 of 19)	-4470	ENSG00000116299	ELAPOR1	endosome-lysosome associated apoptosis and autophagy regulator 1
chr1	109197369	109197785	*	+ 2 fold & sig. in E2	E2 vs DMSO	1.88096954111441	0.00197147643239644	3' UTR	-2406	ENSG00000116299	ELAPOR1	endosome-lysosome associated apoptosis and autophagy regulator 1
chr1	109199088	109199841	*	+ 2 fold & sig. in E2	E2 vs DMSO	4.10348769732779	5.05460491455166e-12	Promoter	-350	ENSG00000116299	ELAPOR1	endosome-lysosome associated apoptosis and autophagy regulator 1
chr1	109213560	109214420	*	+ 2 fold & sig. in E2	E2 vs DMSO	1.36013076964514	0.0112532937206496	Promoter	0	ENSG00000031698	SARS1	seryl-tRNA synthetase 1
chr1	109250461	109251139	*	+ 2 fold & sig. in E2	E2 vs DMSO	2.65876666672061	1.27726459350197e-10	Exon (ENST00000271332.4/1952, exon 1 of 34)	922	ENSG00000143126	CELSR2	cadherin EGF LAG seven-pass G-type receptor 2
chr1	109253384	109253782	*	+ 2 fold & sig. in E2	E2 vs DMSO	2.61311213939947	8.58385127180324e-07	Exon (ENST00000271332.4/1952, exon 1 of 34)	3845	ENSG00000143126	CELSR2	cadherin EGF LAG seven-pass G-type receptor 2
chr1	109272599	109272932	*	+ 2 fold & sig. in E2	E2 vs DMSO	1.28301094351672	0.0284855987100447	Exon (ENST00000271332.4/1952, exon 30 of 34)	1775	ENSG00000143126	CELSR2	cadherin EGF LAG seven-pass G-type receptor 2
chr1	109950301	109950953	*	+ 2 fold & sig. in E2	E2 vs DMSO	1.73273484258277	0.0163979501708945	Distal Intergenic	-33812	ENSG00000168710	AHCYL1	adenosylhomocysteinase like 1
chr1	110535488	110536280	*	+ 2 fold & sig. in E2	E2 vs DMSO	2.47801379689685	0.00298072351507302	Intron (ENST00000640680.1/3737, intron 5 of 8)	-16313	ENSG00000143105	KCNA10	potassium voltage-gated channel subfamily A member 10
chr1	110611984	110612837	*	+ 2 fold & sig. in E2	E2 vs DMSO	1.40856349928357	0.000456530374914268	Intron (ENST00000369770.7/3737, intron 1 of 4)	-3959	ENSG00000177301	KCNA2	potassium voltage-gated channel subfamily A member 2
chr1	11071762	11072753	*	+ 2 fold & sig. in E2	E2 vs DMSO	1.90488678766254	0.00165180448061858	Promoter	0	ENSG00000171824	EXOSC10	exosome component 10
chr1	110746207	110747110	*	+ 2 fold & sig. in E2	E2 vs DMSO	2.48555457290858	6.12839400066781e-10	Distal Intergenic	-71267	ENSG00000177272	KCNA3	potassium voltage-gated channel subfamily A member 3
chr1	111473135	111473847	*	+ 2 fold & sig. in E2	E2 vs DMSO	4.0827000219239	6.31898265533588e-12	Promoter	0	ENSG00000143110	C1orf162	chromosome 1 open reading frame 162
chr1	111507748	111509003	*	+ 2 fold & sig. in E2	E2 vs DMSO	2.57181421521169	1.68340602203433e-11	Intron (ENST00000369717.8/57413, intron 1 of 5)	-4115	ENSG00000121933	TMIGD3	transmembrane and immunoglobulin domain containing 3
chr1	111576073	111576999	*	+ 2 fold & sig. in E2	E2 vs DMSO	1.43643684199649	0.0177234739003365	Intron (ENST00000356415.5/5906, intron 1 of 7)	-12111	ENSG00000121933	TMIGD3	transmembrane and immunoglobulin domain containing 3
chr1	1115847	1116970	*	+ 2 fold & sig. in E2	E2 vs DMSO	2.2380531559558	6.14917950713007e-06	Promoter	0	ENSG00000131591	C1orf159	chromosome 1 open reading frame 159
chr1	111619450	111620613	*	+ 2 fold & sig. in E2	E2 vs DMSO	2.73945910214807	1.28598802102487e-05	Promoter	0	ENSG00000116473	RAP1A	RAP1A, member of RAS oncogene family
chr1	111738810	111740335	*	+ 2 fold & sig. in E2	E2 vs DMSO	1.80032235161558	0.000365941248784809	Promoter	0	ENSG00000227811	INKA2-AS1	INKA2 antisense RNA 1
chr1	111978654	111979153	*	+ 2 fold & sig. in E2	E2 vs DMSO	1.61870044064427	0.000740282976382364	Intron (ENST00000369697.5/3752, intron 1 of 5)	3643	ENSG00000171385	KCND3	potassium voltage-gated channel subfamily D member 3
chr1	112869161	112869808	*	+ 2 fold & sig. in E2	E2 vs DMSO	1.92334124570232	0.0395010019148903	Intron (ENST00000658577.2/ENST00000658577.2, intron 1 of 1)	-18518	ENSG00000215866	LINC01356	long intergenic non-protein coding RNA 1356
chr1	114033220	114033643	*	+ 2 fold & sig. in E2	E2 vs DMSO	1.27028425130804	0.0222532823296159	Exon (ENST00000632517.2/ENST00000632517.2, exon 1 of 1)	52720	ENSG00000116774	OLFML3	olfactomedin like 3
chr1	114033849	114034700	*	+ 2 fold & sig. in E2	E2 vs DMSO	3.37752142976181	5.87880667079831e-12	Exon (ENST00000632517.2/ENST00000632517.2, exon 1 of 1)	53349	ENSG00000116774	OLFML3	olfactomedin like 3
chr1	114036824	114037408	*	+ 2 fold & sig. in E2	E2 vs DMSO	2.36081715922633	3.50968597873269e-07	Distal Intergenic	56324	ENSG00000116774	OLFML3	olfactomedin like 3
chr1	114166872	114167708	*	+ 2 fold & sig. in E2	E2 vs DMSO	1.96414431439111	4.955981928532e-07	Distal Intergenic	-12992	ENSG00000134207	SYT6	synaptotagmin 6
chr1	115323390	115324181	*	+ 2 fold & sig. in E2	E2 vs DMSO	1.0887779041109	0.0482284430591118	Intron (ENST00000425449.1/112840934, intron 1 of 1)	14068	ENSG00000134259	NGF	nerve growth factor
chr1	115456535	115456883	*	+ 2 fold & sig. in E2	E2 vs DMSO	2.06079890740624	0.0182943651947026	Distal Intergenic	-91638	ENSG00000287103	LOC112268234	uncharacterized LOC112268234
chr1	1156575	1158283	*	+ 2 fold & sig. in E2	E2 vs DMSO	1.18132136453108	0.000869470447659873	Distal Intergenic	-8821	ENSG00000207730	MIR200B	microRNA 200b
chr1	116008511	116009290	*	+ 2 fold & sig. in E2	E2 vs DMSO	2.89351626014781	1.96525324417138e-06	Intron (ENST00000369503.9/55356, intron 2 of 11)	-23387	ENSG00000163393	SLC22A15	solute carrier family 22 member 15
chr1	116122944	116124311	*	+ 2 fold & sig. in E2	E2 vs DMSO	1.89641981344318	4.46271506371716e-05	Promoter	0	ENSG00000173212	MAB21L3	mab-21 like 3
chr1	1162483	1163743	*	+ 2 fold & sig. in E2	E2 vs DMSO	1.72752501711211	2.43176039061883e-06	Distal Intergenic	-3361	ENSG00000207730	MIR200B	microRNA 200b
chr1	116267957	116268613	*	+ 2 fold & sig. in E2	E2 vs DMSO	1.57499619678925	0.00108943864901824	Distal Intergenic	-9993	NA	NA	NA
chr1	116289356	116289855	*	+ 2 fold & sig. in E2	E2 vs DMSO	3.00497187863006	0.00152201453030206	Exon (ENST00000660713.1/105378920, exon 3 of 3)	7766	NA	LOC105378920	uncharacterized LOC105378920
chr1	116289935	116290569	*	+ 2 fold & sig. in E2	E2 vs DMSO	2.41310097475076	3.00062594998389e-05	Exon (ENST00000660713.1/105378920, exon 3 of 3)	7052	NA	LOC105378920	uncharacterized LOC105378920
chr1	116311809	116312865	*	+ 2 fold & sig. in E2	E2 vs DMSO	1.5345706343515	2.8600543494709e-06	Distal Intergenic	-14188	NA	LOC105378920	uncharacterized LOC105378920
chr1	116372546	116373681	*	+ 2 fold & sig. in E2	E2 vs DMSO	2.73235884721192	2.0857164441875e-08	Promoter	0	ENSG00000163399	ATP1A1	ATPase Na+/K+ transporting subunit alpha 1
chr1	116485020	116485693	*	+ 2 fold & sig. in E2	E2 vs DMSO	1.51987104666171	0.00407264799114789	Distal Intergenic	-6178	ENSG00000233154	LINC01762	long intergenic non-protein coding RNA 1762
chr1	116492072	116492680	*	+ 2 fold & sig. in E2	E2 vs DMSO	3.15559541469332	4.7076166677745e-09	Promoter	-670	NA	LOC112268235	uncharacterized LOC112268235
chr1	116494318	116494727	*	+ 2 fold & sig. in E2	E2 vs DMSO	1.59833025711185	0.00873861365392974	Exon (ENST00000456414.2/ENST00000456414.2, exon 2 of 2)	968	NA	LOC112268235	uncharacterized LOC112268235
chr1	116569761	116571308	*	+ 2 fold & sig. in E2	E2 vs DMSO	1.01700364019211	0.00269134359545489	Promoter	0	ENSG00000116815	CD58	CD58 molecule
chr1	116575522	116576015	*	+ 2 fold & sig. in E2	E2 vs DMSO	2.61146222992281	0.0104214894914441	3' UTR	-4483	ENSG00000116815	CD58	CD58 molecule
chr1	116642921	116643915	*	+ 2 fold & sig. in E2	E2 vs DMSO	1.90051578168778	1.7263445802937e-06	Intron (ENST00000369483.5/3321, intron 2 of 11)	3030	ENSG00000143061	IGSF3	immunoglobulin superfamily member 3
chr1	116652567	116653308	*	+ 2 fold & sig. in E2	E2 vs DMSO	5.02231529319174	2.19926379681717e-10	Intron (ENST00000369483.5/3321, intron 2 of 11)	-5622	ENSG00000143061	IGSF3	immunoglobulin superfamily member 3
chr1	117017797	117018528	*	+ 2 fold & sig. in E2	E2 vs DMSO	1.96999890108683	0.000209797752368549	Exon (ENST00000256652.8/9398, exon 6 of 9)	13993	ENSG00000236137	CD101-AS1	CD101 antisense RNA 1
chr1	117181495	117182256	*	+ 2 fold & sig. in E2	E2 vs DMSO	2.01424338294018	1.35459515267842e-05	Intron (ENST00000369458.8/79679, intron 1 of 5)	-8229	ENSG00000134258	VTCN1	V-set domain containing T cell activation inhibitor 1
chr1	117570823	117571955	*	+ 2 fold & sig. in E2	E2 vs DMSO	1.02560397351605	0.00118410080719815	Distal Intergenic	33730	ENSG00000236866	TENT5C-DT	TENT5C divergent transcript
chr1	117590172	117591131	*	+ 2 fold & sig. in E2	E2 vs DMSO	1.06376476717012	0.0135143273823144	Distal Intergenic	14554	ENSG00000236866	TENT5C-DT	TENT5C divergent transcript
chr1	117780743	117781377	*	+ 2 fold & sig. in E2	E2 vs DMSO	1.65453347299741	0.0115050551271295	Distal Intergenic	-92001	NA	NA	NA
chr1	120032067	120032630	*	+ 2 fold & sig. in E2	E2 vs DMSO	1.73057495736209	0.0323425269860367	Intron (ENST00000256646.7/4853, intron 1 of 33)	-2104	ENSG00000134250	NOTCH2	notch receptor 2
chr1	1231569	1232221	*	+ 2 fold & sig. in E2	E2 vs DMSO	2.22954001602426	0.00257131283449029	Promoter	0	ENSG00000078808	SDF4	stromal cell derived factor 4
chr1	1236924	1238680	*	+ 2 fold & sig. in E2	E2 vs DMSO	2.41220512798794	8.32674025678326e-12	Distal Intergenic	4478	ENSG00000184163	C1QTNF12	C1q and TNF related 12
chr1	12485271	12486911	*	+ 2 fold & sig. in E2	E2 vs DMSO	1.77401313490354	2.88622768508761e-06	Intron (ENST00000620676.6/55187, intron 67 of 69)	6722	ENSG00000048707	VPS13D	vacuolar protein sorting 13 homolog D
chr1	12595724	12596569	*	+ 2 fold & sig. in E2	E2 vs DMSO	1.41030721851009	0.00502823233888277	Promoter	0	ENSG00000162496	DHRS3	dehydrogenase/reductase 3
chr1	12600070	12600904	*	+ 2 fold & sig. in E2	E2 vs DMSO	3.79981520407152	1.88197641156899e-14	Intron (ENST00000616661.5/9249, intron 1 of 5)	-3762	ENSG00000162496	DHRS3	dehydrogenase/reductase 3
chr1	12618359	12618782	*	+ 2 fold & sig. in E2	E2 vs DMSO	2.26421006295293	0.00681390988172597	Promoter	-149	ENSG00000162496	DHRS3	dehydrogenase/reductase 3
chr1	1273689	1274475	*	+ 2 fold & sig. in E2	E2 vs DMSO	3.17848265090042	0.000235332298919809	Promoter	0	ENSG00000160087	UBE2J2	ubiquitin conjugating enzyme E2 J2
chr1	1293587	1294033	*	+ 2 fold & sig. in E2	E2 vs DMSO	4.00417409171938	0.00240030933471135	Exon (ENST00000492936.5/116983, exon 21 of 22)	975	ENSG00000131584	ACAP3	ArfGAP with coiled-coil, ankyrin repeat and PH domains 3
chr1	1308108	1308505	*	+ 2 fold & sig. in E2	E2 vs DMSO	2.84980213117449	0.000311007261849903	Promoter	-92	ENSG00000169972	PUSL1	pseudouridine synthase like 1
chr1	13241488	13241971	*	+ 2 fold & sig. in E2	E2 vs DMSO	6.98625520858271	0.00781909960644106	Distal Intergenic	-12227	ENSG00000270601	PRAMEF5	PRAME family member 5
chr1	1407014	1408000	*	+ 2 fold & sig. in E2	E2 vs DMSO	2.72872095373773	0.00612959125963412	Promoter	0	ENSG00000242485	MRPL20	mitochondrial ribosomal protein L20
chr1	14282549	14283107	*	+ 2 fold & sig. in E2	E2 vs DMSO	7.10795032233836	0.00872210744569684	Exon (ENST00000449215.2/ENST00000449215.2, exon 2 of 4)	68217	ENSG00000234593	KAZN-AS1	KAZN antisense RNA 1
chr1	1432682	1433921	*	+ 2 fold & sig. in E2	E2 vs DMSO	1.02858223446459	0.00603221131137663	Intron (ENST00000430109.1/102724312, intron 1 of 1)	567	NA	LINC01770	long intergenic non-protein coding RNA 1770
chr1	144537299	144537785	*	+ 2 fold & sig. in E2	E2 vs DMSO	2.38351839090812	1.36776404693723e-06	Distal Intergenic	-13278	NA	NA	NA
chr1	145706364	145706669	*	+ 2 fold & sig. in E2	E2 vs DMSO	1.70297794817037	0.0171087610840353	Intron (ENST00000451928.6/5174, intron 1 of 6)	699	ENSG00000174827	PDZK1	PDZ domain containing 1
chr1	145707874	145708733	*	+ 2 fold & sig. in E2	E2 vs DMSO	2.73938999354107	8.12131135482786e-11	Promoter	0	ENSG00000174827	PDZK1	PDZ domain containing 1
chr1	145711144	145711680	*	+ 2 fold & sig. in E2	E2 vs DMSO	1.91759416741498	0.00155584055960711	Distal Intergenic	-2996	ENSG00000174827	PDZK1	PDZ domain containing 1
chr1	147534139	147534800	*	+ 2 fold & sig. in E2	E2 vs DMSO	2.40927630164456	0.000723938725977072	Distal Intergenic	-6701	ENSG00000116128	BCL9	BCL9 transcription coactivator
chr1	147669248	147670805	*	+ 2 fold & sig. in E2	E2 vs DMSO	2.64611918143263	2.38500780432402e-11	Promoter	0	ENSG00000162836	ACP6	acid phosphatase 6, lysophosphatidic
chr1	148376396	148376986	*	+ 2 fold & sig. in E2	E2 vs DMSO	2.16471911513275	0.000713519888814357	Intron (ENST00000638958.1/105371225, intron 1 of 6)	-11296	ENSG00000278596	MIR6077	microRNA 6077
chr1	14913587	14914259	*	+ 2 fold & sig. in E2	E2 vs DMSO	2.30575573449787	0.000155529670956418	Intron (ENST00000636203.1/23254, intron 3 of 16)	-9871	ENSG00000189337	KAZN	kazrin, periplakin interacting protein
chr1	14925869	14926570	*	+ 2 fold & sig. in E2	E2 vs DMSO	1.52834761570631	0.00221629870514124	Intron (ENST00000636203.1/23254, intron 3 of 16)	1739	ENSG00000189337	KAZN	kazrin, periplakin interacting protein
chr1	149390169	149391045	*	+ 2 fold & sig. in E2	E2 vs DMSO	2.1195870721023	0.0145133635571084	Promoter	0	ENSG00000286219	NOTCH2NLC	notch 2 N-terminal like C
chr1	14977008	14977857	*	+ 2 fold & sig. in E2	E2 vs DMSO	3.12136313640994	9.77074625478983e-11	Intron (ENST00000636203.1/23254, intron 4 of 16)	31089	ENSG00000189337	KAZN	kazrin, periplakin interacting protein
chr1	150017290	150017982	*	+ 2 fold & sig. in E2	E2 vs DMSO	3.53980900023826	1.08797636694515e-08	Distal Intergenic	-6564	ENSG00000264522	OTUD7B	OTU deubiquitinase 7B
chr1	15015679	15016284	*	+ 2 fold & sig. in E2	E2 vs DMSO	1.80922013851773	0.0252915753110352	Intron (ENST00000636203.1/23254, intron 4 of 16)	69760	ENSG00000189337	KAZN	kazrin, periplakin interacting protein
chr1	15047812	15049330	*	+ 2 fold & sig. in E2	E2 vs DMSO	1.43014017931167	0.00796051677571858	Intron (ENST00000636203.1/23254, intron 6 of 16)	101893	ENSG00000189337	KAZN	kazrin, periplakin interacting protein
chr1	150548620	150549350	*	+ 2 fold & sig. in E2	E2 vs DMSO	1.516487278244	0.0341859298462171	Promoter	-19	ENSG00000143382	ADAMTSL4	ADAMTS like 4
chr1	150974854	150975127	*	+ 2 fold & sig. in E2	E2 vs DMSO	2.75488792726203	0.00438212331055856	Promoter	0	ENSG00000143418	CERS2	ceramide synthase 2
chr1	150981242	150982597	*	+ 2 fold & sig. in E2	E2 vs DMSO	1.73575052338647	2.84184590326022e-08	Promoter	0	ENSG00000143412	ANXA9	annexin A9
chr1	151005945	151007154	*	+ 2 fold & sig. in E2	E2 vs DMSO	1.41456480652121	4.0944890540506e-06	Promoter	0	ENSG00000143409	MINDY1	MINDY lysine 48 deubiquitinase 1
chr1	151993535	151994632	*	+ 2 fold & sig. in E2	E2 vs DMSO	2.95638313609457	1.18975517799099e-10	Promoter	0	NA	NBPF18P	NBPF member 18, pseudogene
chr1	153478388	153479303	*	+ 2 fold & sig. in E2	E2 vs DMSO	2.88676211977426	4.8856975305579e-06	Distal Intergenic	-17737	ENSG00000143556	S100A7	S100 calcium binding protein A7
chr1	153483508	153484150	*	+ 2 fold & sig. in E2	E2 vs DMSO	3.38257038116048	8.55350652671096e-05	Distal Intergenic	-22857	ENSG00000143556	S100A7	S100 calcium binding protein A7
chr1	153520327	153521610	*	+ 2 fold & sig. in E2	E2 vs DMSO	1.13707460220176	0.0143418304624629	Distal Intergenic	-11820	NA	NA	NA
chr1	153707999	153708890	*	+ 2 fold & sig. in E2	E2 vs DMSO	1.56132670381724	2.71826034619092e-05	Distal Intergenic	-18206	ENSG00000274940	MIR8083	microRNA 8083
chr1	15453982	15454683	*	+ 2 fold & sig. in E2	E2 vs DMSO	1.51773033507367	0.0241942697995191	Distal Intergenic	-2045	ENSG00000142615	CELA2A	chymotrypsin like elastase 2A
chr1	15462936	15463980	*	+ 2 fold & sig. in E2	E2 vs DMSO	3.43410476630502	1.18399331726191e-13	Exon (ENST00000459653.1/63036, exon 4 of 4)	-1929	ENSG00000215704	CELA2B	chymotrypsin like elastase 2B
chr1	154941318	154941869	*	+ 2 fold & sig. in E2	E2 vs DMSO	1.02384970991169	0.0369974978401803	Distal Intergenic	-4599	ENSG00000163344	PMVK	phosphomevalonate kinase
chr1	155090875	155091874	*	+ 2 fold & sig. in E2	E2 vs DMSO	1.11106693438272	0.0168908446192905	Distal Intergenic	5353	ENSG00000143590	EFNA3	ephrin A3
chr1	155194651	155194889	*	+ 2 fold & sig. in E2	E2 vs DMSO	2.40395100331877	0.024009951953492	Promoter	-107	NA	THBS3-AS1	THBS3 antisense RNA 1
chr1	15524033	15525359	*	+ 2 fold & sig. in E2	E2 vs DMSO	1.20065902449161	5.54755228318943e-05	Promoter	0	ENSG00000132906	CASP9	caspase 9
chr1	156615951	156617083	*	+ 2 fold & sig. in E2	E2 vs DMSO	1.97519487353541	0.000151796247548355	Distal Intergenic	-2248	ENSG00000132702	HAPLN2	hyaluronan and proteoglycan link protein 2
chr1	156985590	156986159	*	+ 2 fold & sig. in E2	E2 vs DMSO	2.42838179597275	0.00594909789380971	Exon (ENST00000368194.8/9826, exon 2 of 41)	-13765	ENSG00000132694	ARHGEF11	Rho guanine nucleotide exchange factor 11
chr1	158028660	158029339	*	+ 2 fold & sig. in E2	E2 vs DMSO	2.43205657940423	6.96025082321609e-05	Intron (ENST00000360089.8/55243, intron 1 of 12)	3110	NA	KIRREL1-IT1	KIRREL1 intronic transcript 1
chr1	161588975	161589981	*	+ 2 fold & sig. in E2	E2 vs DMSO	4.89073529971961	4.85652528235908e-07	Exon (ENST00000502411.5/9103, exon 5 of 5)	-2169	NA	FCGR2C	Fc fragment of IgG receptor IIc (gene/pseudogene)
chr1	161647662	161648135	*	+ 2 fold & sig. in E2	E2 vs DMSO	3.04677380842043	0.0214413693209423	Distal Intergenic	-15008	ENSG00000072694	FCGR2B	Fc fragment of IgG receptor IIb
chr1	161670815	161671829	*	+ 2 fold & sig. in E2	E2 vs DMSO	4.0301977652922	7.90755046671555e-07	Exon (ENST00000358671.10/2213, exon 3 of 8)	7616	ENSG00000072694	FCGR2B	Fc fragment of IgG receptor IIb
chr1	161726012	161727236	*	+ 2 fold & sig. in E2	E2 vs DMSO	2.44403076021789	0.00285854493486064	Promoter	111	ENSG00000162746	FCRLB	Fc receptor like B
chr1	16175608	16176320	*	+ 2 fold & sig. in E2	E2 vs DMSO	1.06817093014688	0.0330558136787816	Distal Intergenic	-19539	ENSG00000142627	EPHA2	EPH receptor A2
chr1	162080853	162081664	*	+ 2 fold & sig. in E2	E2 vs DMSO	2.60277769521317	0.00837580840396797	Intron (ENST00000361897.10/9722, intron 1 of 9)	10763	ENSG00000198929	NOS1AP	nitric oxide synthase 1 adaptor protein
chr1	162115756	162116458	*	+ 2 fold & sig. in E2	E2 vs DMSO	1.25415350615219	0.0229645871034894	Intron (ENST00000361897.10/9722, intron 1 of 9)	-40649	ENSG00000266144	MIR4654	microRNA 4654
chr1	162165396	162166402	*	+ 2 fold & sig. in E2	E2 vs DMSO	2.84755683924919	7.32234994977767e-10	Intron (ENST00000361897.10/9722, intron 2 of 9)	8289	ENSG00000266144	MIR4654	microRNA 4654
chr1	162168189	162168816	*	+ 2 fold & sig. in E2	E2 vs DMSO	1.95080703516567	1.78239195216162e-05	Exon (ENST00000648032.1/105371475, exon 3 of 4)	6044	NA	LOC105371475	uncharacterized LOC105371475
chr1	162285053	162286011	*	+ 2 fold & sig. in E2	E2 vs DMSO	1.34868310092973	0.000648716592632648	Intron (ENST00000361897.10/9722, intron 2 of 9)	31783	NA	NA	NA
chr1	164637436	164638034	*	+ 2 fold & sig. in E2	E2 vs DMSO	2.33864823716449	0.0280377407964417	Intron (ENST00000420696.7/5087, intron 2 of 8)	6455	ENSG00000185630	PBX1	PBX homeobox 1
chr1	164706808	164707494	*	+ 2 fold & sig. in E2	E2 vs DMSO	1.53496422067941	0.0464064656197137	Intron (ENST00000420696.7/5087, intron 2 of 8)	6465	ENSG00000185630	PBX1	PBX homeobox 1
chr1	164716160	164716582	*	+ 2 fold & sig. in E2	E2 vs DMSO	3.1314250939623	0.0162317527743031	Intron (ENST00000420696.7/5087, intron 2 of 8)	15817	ENSG00000185630	PBX1	PBX homeobox 1
chr1	164757727	164758059	*	+ 2 fold & sig. in E2	E2 vs DMSO	6.53763412783388	0.0232259483310617	Intron (ENST00000420696.7/5087, intron 2 of 8)	-14853	ENSG00000185630	PBX1	PBX homeobox 1
chr1	16613317	16613972	*	+ 2 fold & sig. in E2	E2 vs DMSO	1.18652882749054	0.00199505262717676	Promoter	0	ENSG00000219481	NBPF1	NBPF member 1
chr1	16707526	16708257	*	+ 2 fold & sig. in E2	E2 vs DMSO	4.7934847237191	4.47158546009445e-06	Exon (ENST00000270691.9/284729, exon 2 of 11)	2362	NA	ESPNP	espin pseudogene
chr1	1676252	1676467	*	+ 2 fold & sig. in E2	E2 vs DMSO	3.45392439673671	0.00630059259125991	Exon (ENST00000614300.4/728661, exon 3 of 7)	-6113	ENSG00000189339	SLC35E2B	solute carrier family 35 member E2B
chr1	1676535	1677017	*	+ 2 fold & sig. in E2	E2 vs DMSO	4.78780524064774	9.34546690503562e-07	5' UTR	-6396	ENSG00000189339	SLC35E2B	solute carrier family 35 member E2B
chr1	1678311	1679118	*	+ 2 fold & sig. in E2	E2 vs DMSO	1.55808460899406	9.23532343320382e-06	Intron (ENST00000614300.4/728661, intron 2 of 6)	-8172	ENSG00000189339	SLC35E2B	solute carrier family 35 member E2B
chr1	1680567	1681250	*	+ 2 fold & sig. in E2	E2 vs DMSO	1.2371763945542	0.00165957350600389	Intron (ENST00000614300.4/728661, intron 2 of 6)	-10428	ENSG00000189339	SLC35E2B	solute carrier family 35 member E2B
chr1	1686252	1687047	*	+ 2 fold & sig. in E2	E2 vs DMSO	1.02676293790311	0.0096223659271097	Intron (ENST00000614300.4/728661, intron 2 of 6)	5662	ENSG00000189339	SLC35E2B	solute carrier family 35 member E2B
chr1	168906876	168907913	*	+ 2 fold & sig. in E2	E2 vs DMSO	1.62183820679012	2.22303677788399e-05	Exon (ENST00000366408.3/101978719, exon 4 of 5)	116804	ENSG00000225826	LINC00626	long intergenic non-protein coding RNA 626
chr1	1692402	1693446	*	+ 2 fold & sig. in E2	E2 vs DMSO	2.04374139067469	2.40275181068171e-05	Promoter	0	ENSG00000189339	SLC35E2B	solute carrier family 35 member E2B
chr1	169485267	169486321	*	+ 2 fold & sig. in E2	E2 vs DMSO	1.48467564691676	1.15898646757512e-05	Promoter	0	ENSG00000117479	SLC19A2	solute carrier family 19 member 2
chr1	17029360	17030141	*	+ 2 fold & sig. in E2	E2 vs DMSO	2.20164459565467	1.37862388883099e-06	Intron (ENST00000375499.8/6390, intron 3 of 7)	-6200	ENSG00000117118	SDHB	succinate dehydrogenase complex iron sulfur subunit B
chr1	17098709	17099432	*	+ 2 fold & sig. in E2	E2 vs DMSO	2.60273955752889	0.00890245883250065	Intron (ENST00000375486.9/11240, intron 3 of 15)	-15283	ENSG00000117115	PADI2	peptidyl arginine deiminase 2
chr1	1721104	1721625	*	+ 2 fold & sig. in E2	E2 vs DMSO	1.27159507408188	0.00967755361492357	Promoter	30	ENSG00000008128	CDK11A	cyclin dependent kinase 11A
chr1	17250484	17251461	*	+ 2 fold & sig. in E2	E2 vs DMSO	1.03226336975771	0.0247792779145617	Intron (ENST00000375460.3/51702, intron 1 of 15)	1386	ENSG00000142619	PADI3	peptidyl arginine deiminase 3
chr1	17297803	17298428	*	+ 2 fold & sig. in E2	E2 vs DMSO	2.20620667115892	0.0357375860529771	Distal Intergenic	-9767	ENSG00000159339	PADI4	peptidyl arginine deiminase 4
chr1	17304014	17305105	*	+ 2 fold & sig. in E2	E2 vs DMSO	1.83241734975758	2.58627203562727e-06	Distal Intergenic	-3090	ENSG00000159339	PADI4	peptidyl arginine deiminase 4
chr1	17314536	17315411	*	+ 2 fold & sig. in E2	E2 vs DMSO	4.46039269522113	1.4233988240851e-14	Intron (ENST00000375453.5/23569, intron 1 of 3)	6339	ENSG00000159339	PADI4	peptidyl arginine deiminase 4
chr1	173476557	173477271	*	+ 2 fold & sig. in E2	E2 vs DMSO	1.42686869375891	0.00671145883173041	Promoter	0	ENSG00000203739	PRDX6-AS1	PRDX6 antisense RNA 1
chr1	1738924	1739883	*	+ 2 fold & sig. in E2	E2 vs DMSO	3.95103321541346	4.84568753909021e-08	Promoter	0	ENSG00000215790	SLC35E2A	solute carrier family 35 member E2A
chr1	1741044	1741487	*	+ 2 fold & sig. in E2	E2 vs DMSO	1.93422399131048	0.00523119682794203	Intron (ENST00000647043.1/9906, intron 2 of 6)	-1487	ENSG00000215790	SLC35E2A	solute carrier family 35 member E2A
chr1	1745778	1746690	*	+ 2 fold & sig. in E2	E2 vs DMSO	1.58735658544305	0.000340747046053414	Promoter	0	ENSG00000215790	SLC35E2A	solute carrier family 35 member E2A
chr1	17472705	17473136	*	+ 2 fold & sig. in E2	E2 vs DMSO	2.56903454657268	0.0106398293944798	Distal Intergenic	-33028	ENSG00000179051	RCC2	regulator of chromosome condensation 2
chr1	17559505	17560382	*	+ 2 fold & sig. in E2	E2 vs DMSO	2.3364915817795	5.58773529795602e-09	Intron (ENST00000361221.8/55160, intron 1 of 28)	19807	ENSG00000074964	ARHGEF10L	Rho guanine nucleotide exchange factor 10 like
chr1	17561330	17562126	*	+ 2 fold & sig. in E2	E2 vs DMSO	3.00919705528705	6.05797909772967e-10	Intron (ENST00000361221.8/55160, intron 1 of 28)	-18427	ENSG00000074964	ARHGEF10L	Rho guanine nucleotide exchange factor 10 like
chr1	17599661	17600018	*	+ 2 fold & sig. in E2	E2 vs DMSO	6.61584885382093	0.0209934650129778	Intron (ENST00000361221.8/55160, intron 4 of 28)	-2153	ENSG00000074964	ARHGEF10L	Rho guanine nucleotide exchange factor 10 like
chr1	1762950	1763294	*	+ 2 fold & sig. in E2	E2 vs DMSO	1.07398157878091	0.007069488744605	Intron (ENST00000341426.9/65220, intron 2 of 11)	-4375	ENSG00000008130	NADK	NAD kinase
chr1	176752443	176753117	*	+ 2 fold & sig. in E2	E2 vs DMSO	1.87090663768815	0.0444691949565447	Intron (ENST00000367662.5/60676, intron 14 of 22)	-38328	ENSG00000116183	PAPPA2	pappalysin 2
chr1	177063755	177064267	*	+ 2 fold & sig. in E2	E2 vs DMSO	3.39765453722142	0.00563267706747573	Intron (ENST00000367657.7/460, intron 1 of 22)	-31205	ENSG00000152092	ASTN1	astrotactin 1
chr1	177440804	177441340	*	+ 2 fold & sig. in E2	E2 vs DMSO	2.92609729465417	2.23275911761476e-05	Intron (ENST00000701603.1/102724661, intron 3 of 3)	89224	ENSG00000224968	LINC01645	long intergenic non-protein coding RNA 1645
chr1	177476613	177477205	*	+ 2 fold & sig. in E2	E2 vs DMSO	2.70401691902366	0.00786588583665402	Intron (ENST00000663166.1/ENST00000663166.1, intron 4 of 4)	125033	ENSG00000224968	LINC01645	long intergenic non-protein coding RNA 1645
chr1	177571173	177572232	*	+ 2 fold & sig. in E2	E2 vs DMSO	1.5613372624683	0.00985373625469262	Exon (ENST00000654501.1/ENST00000654501.1, exon 1 of 3)	-128292	ENSG00000236720	LINC01741	long intergenic non-protein coding RNA 1741
chr1	177620570	177621162	*	+ 2 fold & sig. in E2	E2 vs DMSO	2.13558659533337	0.0155800673134308	Intron (ENST00000663166.1/ENST00000663166.1, intron 1 of 4)	-79362	ENSG00000236720	LINC01741	long intergenic non-protein coding RNA 1741
chr1	17834214	17835042	*	+ 2 fold & sig. in E2	E2 vs DMSO	2.90586427929072	0.00475407043822628	Distal Intergenic	11232	ENSG00000117148	ACTL8	actin like 8
chr1	178724929	178726695	*	+ 2 fold & sig. in E2	E2 vs DMSO	3.15269016469928	9.5411356331369e-06	Promoter	0	NA	NA	NA
chr1	17878941	17879402	*	+ 2 fold & sig. in E2	E2 vs DMSO	2.38096474935055	0.00114434869156862	Distal Intergenic	55959	ENSG00000117148	ACTL8	actin like 8
chr1	178953648	178954500	*	+ 2 fold & sig. in E2	E2 vs DMSO	1.73836916081775	0.00808318766903569	Distal Intergenic	59810	ENSG00000116191	RALGPS2	Ral GEF with PH domain and SH3 binding motif 2
chr1	1793235	1794088	*	+ 2 fold & sig. in E2	E2 vs DMSO	1.9042651360559	2.40871092420157e-05	Promoter	109	ENSG00000078369	GNB1	G protein subunit beta 1
chr1	179586275	179586761	*	+ 2 fold & sig. in E2	E2 vs DMSO	6.74421593722389	0.0139125536220273	Exon (ENST00000427215.2/ENST00000427215.2, exon 1 of 1)	-4852	ENSG00000162782	TDRD5	tudor domain containing 5
chr1	179591466	179592311	*	+ 2 fold & sig. in E2	E2 vs DMSO	1.75051864295201	9.21451617400262e-05	Promoter	0	ENSG00000162782	TDRD5	tudor domain containing 5
chr1	180080447	180080980	*	+ 2 fold & sig. in E2	E2 vs DMSO	2.3019519179676	0.00699468651956108	3' UTR	-4600	ENSG00000135837	CEP350	centrosomal protein 350
chr1	180154493	180155105	*	+ 2 fold & sig. in E2	E2 vs DMSO	3.76871779001483	4.67617531481825e-07	Promoter	0	ENSG00000116260	QSOX1	quiescin sulfhydryl oxidase 1
chr1	180168664	180169291	*	+ 2 fold & sig. in E2	E2 vs DMSO	1.37546016447528	0.000330699406069242	Intron (ENST00000367602.8/5768, intron 2 of 11)	13767	ENSG00000116260	QSOX1	quiescin sulfhydryl oxidase 1
chr1	180228420	180229293	*	+ 2 fold & sig. in E2	E2 vs DMSO	4.04112655004989	1.53810745875698e-13	Promoter	-971	ENSG00000121454	LHX4	LIM homeobox 4
chr1	180229953	180230290	*	+ 2 fold & sig. in E2	E2 vs DMSO	9.38297084488497	2.8575309309751e-08	Promoter	0	ENSG00000121454	LHX4	LIM homeobox 4
chr1	180231227	180231863	*	+ 2 fold & sig. in E2	E2 vs DMSO	1.4316771219031	0.00281208304213245	Intron (ENST00000263726.4/89884, intron 1 of 5)	929	ENSG00000121454	LHX4	LIM homeobox 4
chr1	180953282	180954623	*	+ 2 fold & sig. in E2	E2 vs DMSO	1.65547928405952	0.0027678221131369	Promoter	264	ENSG00000232586	KIAA1614-AS1	KIAA1614 antisense RNA 1
chr1	181021955	181023442	*	+ 2 fold & sig. in E2	E2 vs DMSO	1.36189858492989	0.00303696813481026	Promoter	0	ENSG00000135823	STX6	syntaxin 6
chr1	181088255	181089086	*	+ 2 fold & sig. in E2	E2 vs DMSO	1.39886605252938	1.81683456816831e-05	Promoter	0	ENSG00000162783	IER5	immediate early response 5
chr1	181089628	181090311	*	+ 2 fold & sig. in E2	E2 vs DMSO	1.77759018211663	0.000251958966096489	3' UTR	928	ENSG00000162783	IER5	immediate early response 5
chr1	181104522	181105814	*	+ 2 fold & sig. in E2	E2 vs DMSO	2.86540555928119	2.48082843508084e-09	Distal Intergenic	15822	ENSG00000162783	IER5	immediate early response 5
chr1	181133374	181134083	*	+ 2 fold & sig. in E2	E2 vs DMSO	3.00813895800956	7.50757516313687e-13	Distal Intergenic	-40401	ENSG00000237292	LINC01732	long intergenic non-protein coding RNA 1732
chr1	181141192	181141954	*	+ 2 fold & sig. in E2	E2 vs DMSO	2.34355724087216	1.50559585928478e-06	Distal Intergenic	-32530	ENSG00000237292	LINC01732	long intergenic non-protein coding RNA 1732
chr1	181142355	181142837	*	+ 2 fold & sig. in E2	E2 vs DMSO	2.18290465993242	0.00144784919614622	Distal Intergenic	-31647	ENSG00000237292	LINC01732	long intergenic non-protein coding RNA 1732
chr1	18132067	18132780	*	+ 2 fold & sig. in E2	E2 vs DMSO	2.75058824266966	0.000129461209854953	Intron (ENST00000251296.4/84966, intron 1 of 9)	24269	ENSG00000117154	IGSF21	immunoglobin superfamily member 21
chr1	182087701	182088523	*	+ 2 fold & sig. in E2	E2 vs DMSO	2.11080042629318	0.0014901432977815	Exon (ENST00000428646.1/ENST00000428646.1, exon 2 of 3)	-18448	ENSG00000179930	ZNF648	zinc finger protein 648
chr1	182314866	182315714	*	+ 2 fold & sig. in E2	E2 vs DMSO	2.9912614529794	9.21733450528579e-05	Promoter	-805	NA	LINC01344	long intergenic non-protein coding RNA 1344
chr1	182391100	182392071	*	+ 2 fold & sig. in E2	E2 vs DMSO	3.0976724179496	1.28764276204236e-05	Promoter	0	ENSG00000135821	GLUL	glutamate-ammonia ligase
chr1	182397680	182398243	*	+ 2 fold & sig. in E2	E2 vs DMSO	3.62507329785047	0.00240226111341528	3' UTR	2424	ENSG00000203730	TEDDM1	transmembrane epididymal protein 1
chr1	182603207	182604735	*	+ 2 fold & sig. in E2	E2 vs DMSO	1.42304391582234	0.000195798907191134	Promoter	0	ENSG00000143333	RGS16	regulator of G protein signaling 16
chr1	182952941	182953919	*	+ 2 fold & sig. in E2	E2 vs DMSO	3.70493892100157	1.02212421739122e-05	Promoter	0	ENSG00000157060	SHCBP1L	SHC binding and spindle associated 1 like
chr1	183023277	183024459	*	+ 2 fold & sig. in E2	E2 vs DMSO	4.18094873662522	1.08216681824754e-13	Promoter	0	ENSG00000135862	LAMC1	laminin subunit gamma 1
chr1	183222752	183223302	*	+ 2 fold & sig. in E2	E2 vs DMSO	3.12891269187411	0.000734644040012114	Exon (ENST00000493293.5/3918, exon 7 of 22)	-16199	ENSG00000058085	LAMC2	laminin subunit gamma 2
chr1	183249273	183249847	*	+ 2 fold & sig. in E2	E2 vs DMSO	2.09649621227758	0.0186359764695998	3' UTR	-2416	ENSG00000058085	LAMC2	laminin subunit gamma 2
chr1	183262698	183263295	*	+ 2 fold & sig. in E2	E2 vs DMSO	2.23818796089894	0.000779751951850499	Intron (ENST00000294868.8/23057, intron 8 of 10)	10435	ENSG00000058085	LAMC2	laminin subunit gamma 2
chr1	18369337	18369699	*	+ 2 fold & sig. in E2	E2 vs DMSO	2.94252203786271	0.0296255937163612	Intron (ENST00000251296.4/84966, intron 6 of 9)	-6258	ENSG00000117154	IGSF21	immunoglobin superfamily member 21
chr1	184372916	184373662	*	+ 2 fold & sig. in E2	E2 vs DMSO	2.73818519638993	2.23904227897459e-06	Distal Intergenic	13042	NA	C1orf21-DT	C1orf21 divergent transcript
chr1	184482805	184483625	*	+ 2 fold & sig. in E2	E2 vs DMSO	2.40727279442944	1.08845755110521e-05	Intron (ENST00000235307.7/81563, intron 2 of 5)	5297	ENSG00000116667	C1orf21	chromosome 1 open reading frame 21
chr1	184622280	184622805	*	+ 2 fold & sig. in E2	E2 vs DMSO	1.47406268763522	0.000981998041037643	3' UTR	7634	NA	LOC107985236	uncharacterized LOC107985236
chr1	184626384	184627195	*	+ 2 fold & sig. in E2	E2 vs DMSO	2.46633068854702	6.82008777683961e-11	3' UTR	3244	NA	LOC107985236	uncharacterized LOC107985236
chr1	184632410	184633435	*	+ 2 fold & sig. in E2	E2 vs DMSO	2.50493110490487	1.66921952566115e-06	Intron (ENST00000660403.1/107985236, intron 2 of 3)	-1971	NA	LOC107985236	uncharacterized LOC107985236
chr1	184635244	184635805	*	+ 2 fold & sig. in E2	E2 vs DMSO	1.96620573203004	0.000196515329633835	Exon (ENST00000657103.1/124904468, exon 5 of 5)	-4805	NA	LOC107985236	uncharacterized LOC107985236
chr1	1891184	1891943	*	+ 2 fold & sig. in E2	E2 vs DMSO	2.61960755858771	0.0212401674458039	Promoter	0	NA	GNB1-DT	GNB1 divergent transcript
chr1	189740750	189741248	*	+ 2 fold & sig. in E2	E2 vs DMSO	6.74412513027358	0.0142872949033537	Distal Intergenic	-34217	ENSG00000232212	LINC01701	long intergenic non-protein coding RNA 1701
chr1	19007349	19008019	*	+ 2 fold & sig. in E2	E2 vs DMSO	1.36095538679987	0.0144426087114467	Distal Intergenic	-50673	ENSG00000169991	IFFO2	intermediate filament family orphan 2
chr1	19425779	19426288	*	+ 2 fold & sig. in E2	E2 vs DMSO	5.41232995305564	1.46713067122128e-08	Intron (ENST00000264202.8/832, intron 1 of 8)	-5635	ENSG00000077549	CAPZB	capping actin protein of muscle Z-line subunit beta
chr1	19426902	19427673	*	+ 2 fold & sig. in E2	E2 vs DMSO	3.88266059530834	4.17222771434404e-06	Intron (ENST00000264202.8/832, intron 1 of 8)	-6758	ENSG00000077549	CAPZB	capping actin protein of muscle Z-line subunit beta
chr1	19440322	19440871	*	+ 2 fold & sig. in E2	E2 vs DMSO	3.40361998502331	0.00418985645497458	Intron (ENST00000264202.8/832, intron 1 of 8)	-20178	ENSG00000077549	CAPZB	capping actin protein of muscle Z-line subunit beta
chr1	19471899	19472638	*	+ 2 fold & sig. in E2	E2 vs DMSO	1.68363647264263	0.00111680045754461	Intron (ENST00000264202.8/832, intron 1 of 8)	-11765	ENSG00000173436	MICOS10	mitochondrial contact site and cristae organizing system subunit 10
chr1	19484784	19486239	*	+ 2 fold & sig. in E2	E2 vs DMSO	1.88312042404804	0.000693284322312465	Promoter	0	ENSG00000077549	CAPZB	capping actin protein of muscle Z-line subunit beta
chr1	19582204	19582684	*	+ 2 fold & sig. in E2	E2 vs DMSO	6.61272591881716	0.0178541104903589	Intron (ENST00000648702.1/440574, intron 1 of 3)	14148	ENSG00000235185	MICOS10-DT	MICOS10 divergent transcript
chr1	197485443	197486450	*	+ 2 fold & sig. in E2	E2 vs DMSO	1.25307616730432	0.00475163208010756	Distal Intergenic	43273	ENSG00000134376	CRB1	crumbs cell polarity complex component 1
chr1	199918028	199918815	*	+ 2 fold & sig. in E2	E2 vs DMSO	2.69719559975571	0.000105498867273844	Distal Intergenic	-108799	ENSG00000116833	NR5A2	nuclear receptor subfamily 5 group A member 2
chr1	199995104	199995731	*	+ 2 fold & sig. in E2	E2 vs DMSO	3.40981355348872	0.000150722029315599	Distal Intergenic	-31883	ENSG00000116833	NR5A2	nuclear receptor subfamily 5 group A member 2
chr1	200016660	200017449	*	+ 2 fold & sig. in E2	E2 vs DMSO	4.66012961640843	1.27539853235247e-16	Distal Intergenic	-10165	ENSG00000116833	NR5A2	nuclear receptor subfamily 5 group A member 2
chr1	200090535	200091735	*	+ 2 fold & sig. in E2	E2 vs DMSO	3.23285259238285	6.31898265533588e-12	Intron (ENST00000236914.7/2494, intron 4 of 6)	46725	ENSG00000116833	NR5A2	nuclear receptor subfamily 5 group A member 2
chr1	200106891	200107839	*	+ 2 fold & sig. in E2	E2 vs DMSO	1.49863463409356	0.00960798010311327	Intron (ENST00000236914.7/2494, intron 4 of 6)	63081	ENSG00000116833	NR5A2	nuclear receptor subfamily 5 group A member 2
chr1	200114428	200114970	*	+ 2 fold & sig. in E2	E2 vs DMSO	2.94024363333963	2.03381624391547e-06	Intron (ENST00000236914.7/2494, intron 5 of 6)	70618	ENSG00000116833	NR5A2	nuclear receptor subfamily 5 group A member 2
chr1	200118406	200119263	*	+ 2 fold & sig. in E2	E2 vs DMSO	2.74338318640038	3.48087082536445e-07	Intron (ENST00000236914.7/2494, intron 5 of 6)	74596	ENSG00000116833	NR5A2	nuclear receptor subfamily 5 group A member 2
chr1	200150540	200151249	*	+ 2 fold & sig. in E2	E2 vs DMSO	1.51520737730905	0.00550959918790456	Intron (ENST00000236914.7/2494, intron 6 of 6)	106730	ENSG00000116833	NR5A2	nuclear receptor subfamily 5 group A member 2
chr1	200302121	200302908	*	+ 2 fold & sig. in E2	E2 vs DMSO	2.50109669084647	0.00322282798072276	Intron (ENST00000636153.1/554279, intron 4 of 4)	-30285	NA	NA	NA
chr1	200336975	200337897	*	+ 2 fold & sig. in E2	E2 vs DMSO	3.71116784940338	2.88617609215791e-10	Intron (ENST00000637430.1/124904480, intron 1 of 5)	3782	NA	NA	NA
chr1	200888653	200889663	*	+ 2 fold & sig. in E2	E2 vs DMSO	1.77654200175244	0.00626642916039375	Distal Intergenic	-1385	ENSG00000163362	INAVA	innate immunity activator
chr1	201268856	201269556	*	+ 2 fold & sig. in E2	E2 vs DMSO	1.34921363919774	0.0127728270025777	Distal Intergenic	-13896	ENSG00000081277	PKP1	plakophilin 1
chr1	201274550	201275810	*	+ 2 fold & sig. in E2	E2 vs DMSO	1.25532831855299	6.64622902113333e-05	Distal Intergenic	-7642	ENSG00000081277	PKP1	plakophilin 1
chr1	201282121	201282709	*	+ 2 fold & sig. in E2	E2 vs DMSO	1.30578287720403	0.0233685693181577	Promoter	-743	ENSG00000081277	PKP1	plakophilin 1
chr1	201283191	201283661	*	+ 2 fold & sig. in E2	E2 vs DMSO	1.86098184780306	0.00818093825739309	Promoter	0	ENSG00000081277	PKP1	plakophilin 1
chr1	201310747	201311424	*	+ 2 fold & sig. in E2	E2 vs DMSO	1.22967583219757	0.0029061945989576	Intron (ENST00000263946.7/5317, intron 2 of 14)	-4768	ENSG00000081277	PKP1	plakophilin 1
chr1	201353007	201353939	*	+ 2 fold & sig. in E2	E2 vs DMSO	4.25315667899471	1.27539853235247e-16	Distal Intergenic	7418	ENSG00000118194	TNNT2	troponin T2, cardiac type
chr1	201358879	201359579	*	+ 2 fold & sig. in E2	E2 vs DMSO	1.87005549079522	0.000442313648642153	3' UTR	1778	ENSG00000118194	TNNT2	troponin T2, cardiac type
chr1	201380923	201381953	*	+ 2 fold & sig. in E2	E2 vs DMSO	1.46997915196385	5.04999256702432e-05	Promoter	301	ENSG00000118194	TNNT2	troponin T2, cardiac type
chr1	201506419	201507575	*	+ 2 fold & sig. in E2	E2 vs DMSO	1.74553138766549	0.000593870754148337	Promoter	0	ENSG00000224536	CSRP1-AS1	CSRP1 antisense RNA 1
chr1	201713232	201713843	*	+ 2 fold & sig. in E2	E2 vs DMSO	2.44797810036028	2.13892103980188e-09	Intron (ENST00000685211.1/89796, intron 6 of 33)	-5665	ENSG00000264802	MIR5191	microRNA 5191
chr1	201714497	201715306	*	+ 2 fold & sig. in E2	E2 vs DMSO	3.04846982743072	9.01438802519143e-11	Intron (ENST00000685211.1/89796, intron 6 of 33)	-4202	ENSG00000264802	MIR5191	microRNA 5191
chr1	201739523	201740044	*	+ 2 fold & sig. in E2	E2 vs DMSO	1.26279571583504	0.00755561708765975	Promoter	0	ENSG00000134369	NAV1	neuron navigator 1
chr1	202008091	202008634	*	+ 2 fold & sig. in E2	E2 vs DMSO	1.3764129686949	0.00328534872740225	Promoter	146	ENSG00000163435	ELF3	E74 like ETS transcription factor 3
chr1	202029201	202029892	*	+ 2 fold & sig. in E2	E2 vs DMSO	2.07090390791741	2.20848996901429e-07	Distal Intergenic	15423	ENSG00000163435	ELF3	E74 like ETS transcription factor 3
chr1	202091083	202091467	*	+ 2 fold & sig. in E2	E2 vs DMSO	1.4701123033062	0.00532022990625809	Distal Intergenic	-31419	ENSG00000170075	GPR37L1	G protein-coupled receptor 37 like 1
chr1	202107305	202107945	*	+ 2 fold & sig. in E2	E2 vs DMSO	2.74278347478177	1.83443823055514e-11	Distal Intergenic	-14941	ENSG00000170075	GPR37L1	G protein-coupled receptor 37 like 1
chr1	202112564	202113593	*	+ 2 fold & sig. in E2	E2 vs DMSO	4.63841742008574	4.14880697656667e-17	Distal Intergenic	-9293	ENSG00000170075	GPR37L1	G protein-coupled receptor 37 like 1
chr1	202118672	202119420	*	+ 2 fold & sig. in E2	E2 vs DMSO	1.29496556237809	0.000323221986768987	Distal Intergenic	-3466	ENSG00000170075	GPR37L1	G protein-coupled receptor 37 like 1
chr1	202335151	202336183	*	+ 2 fold & sig. in E2	E2 vs DMSO	2.53779970227892	1.52249484052948e-08	5' UTR	5742	ENSG00000077152	UBE2T	ubiquitin conjugating enzyme E2 T
chr1	202531991	202532636	*	+ 2 fold & sig. in E2	E2 vs DMSO	2.34208367658147	3.72228101088413e-05	Intron (ENST00000608999.6/4660, intron 18 of 23)	-4564	NA	NA	NA
chr1	203059019	203059876	*	+ 2 fold & sig. in E2	E2 vs DMSO	2.72711990188332	2.33852779196889e-08	Exon (ENST00000688357.1/8497, exon 20 of 30)	-1490	ENSG00000143847	PPFIA4	PTPRF interacting protein alpha 4
chr1	203100449	203100881	*	+ 2 fold & sig. in E2	E2 vs DMSO	3.98167077586359	0.000504443815081043	Intron (ENST00000309502.7/134, intron 2 of 5)	9795	ENSG00000163485	ADORA1	adenosine A1 receptor
chr1	203101778	203102377	*	+ 2 fold & sig. in E2	E2 vs DMSO	4.99242994143755	3.63516147968458e-07	Intron (ENST00000309502.7/134, intron 2 of 5)	11124	ENSG00000163485	ADORA1	adenosine A1 receptor
chr1	203131633	203132089	*	+ 2 fold & sig. in E2	E2 vs DMSO	2.62001937615304	0.000210040637818941	Intron (ENST00000309502.7/134, intron 5 of 5)	1999	ENSG00000163485	ADORA1	adenosine A1 receptor
chr1	203169438	203170354	*	+ 2 fold & sig. in E2	E2 vs DMSO	1.59708962632581	2.0257617313286e-05	Exon (ENST00000255416.9/4608, exon 7 of 11)	5472	ENSG00000133055	MYBPH	myosin binding protein H
chr1	203184548	203185596	*	+ 2 fold & sig. in E2	E2 vs DMSO	2.92732812341215	1.77481201964779e-11	Exon (ENST00000255409.8/1116, exon 3 of 10)	1108	ENSG00000133048	CHI3L1	chitinase 3 like 1
chr1	203210908	203211642	*	+ 2 fold & sig. in E2	E2 vs DMSO	2.09058127487104	3.99387173005971e-06	Distal Intergenic	6379	ENSG00000133063	CHIT1	chitinase 1
chr1	203284554	203284870	*	+ 2 fold & sig. in E2	E2 vs DMSO	2.03020666237502	0.0083504959498385	Intron (ENST00000666545.1/100506775, intron 1 of 3)	-1605	NA	LINC01353	long intergenic non-protein coding RNA 1353
chr1	203429014	203429608	*	+ 2 fold & sig. in E2	E2 vs DMSO	2.2927400533971	0.0353552585503931	Distal Intergenic	-46198	ENSG00000188783	PRELP	proline and arginine rich end leucine rich repeat protein
chr1	203512507	203513551	*	+ 2 fold & sig. in E2	E2 vs DMSO	1.19535397487796	0.0144035050103205	Distal Intergenic	16537	ENSG00000188770	OPTC	opticin
chr1	20355845	20356332	*	+ 2 fold & sig. in E2	E2 vs DMSO	1.21437795177409	0.0358034413600626	3' UTR	22927	ENSG00000158816	VWA5B1	von Willebrand factor A domain containing 5B1
chr1	20356580	20357792	*	+ 2 fold & sig. in E2	E2 vs DMSO	2.46924131481554	4.06807017922735e-08	3' UTR	23662	ENSG00000158816	VWA5B1	von Willebrand factor A domain containing 5B1
chr1	203605189	203605890	*	+ 2 fold & sig. in E2	E2 vs DMSO	1.99282265444557	0.027481888186519	Distal Intergenic	-20942	ENSG00000058668	ATP2B4	ATPase plasma membrane Ca2+ transporting 4
chr1	204141105	204141640	*	+ 2 fold & sig. in E2	E2 vs DMSO	2.10112035274287	0.00727295455761019	Promoter	0	ENSG00000230550	ERLNC1	estrogen receptor responsive lncRNA 1
chr1	204145200	204145752	*	+ 2 fold & sig. in E2	E2 vs DMSO	1.32344321765771	0.0426339799216915	Intron (ENST00000367201.7/55224, intron 3 of 7)	1208	ENSG00000143845	ETNK2	ethanolamine kinase 2
chr1	204708428	204708978	*	+ 2 fold & sig. in E2	E2 vs DMSO	1.62086208854122	0.0146841606201835	Distal Intergenic	-22690	ENSG00000170382	LRRN2	leucine rich repeat neuronal 2
chr1	204728588	204729248	*	+ 2 fold & sig. in E2	E2 vs DMSO	1.69058770566011	0.0124052800760446	Distal Intergenic	-42850	ENSG00000170382	LRRN2	leucine rich repeat neuronal 2
chr1	204749898	204750282	*	+ 2 fold & sig. in E2	E2 vs DMSO	3.33789492650803	0.00840699322388479	Distal Intergenic	-64160	ENSG00000170382	LRRN2	leucine rich repeat neuronal 2
chr1	204758682	204758940	*	+ 2 fold & sig. in E2	E2 vs DMSO	1.85605962497234	0.00295099271979673	Distal Intergenic	-69711	ENSG00000163531	NFASC	neurofascin
chr1	205535988	205536851	*	+ 2 fold & sig. in E2	E2 vs DMSO	1.39346596995629	0.00296888046171797	Distal Intergenic	5675	ENSG00000117266	CDK18	cyclin dependent kinase 18
chr1	205652758	205653300	*	+ 2 fold & sig. in E2	E2 vs DMSO	1.93883589427508	0.0140965684297514	Distal Intergenic	9368	ENSG00000158715	SLC45A3	solute carrier family 45 member 3
chr1	205894824	205895563	*	+ 2 fold & sig. in E2	E2 vs DMSO	1.9295098103876	0.000917601285565374	Exon (ENST00000656763.1/284581, exon 3 of 3)	4777	NA	LOC284581	uncharacterized LOC284581
chr1	206843380	206844185	*	+ 2 fold & sig. in E2	E2 vs DMSO	2.97728304232126	3.12479427560191e-08	Distal Intergenic	6717	ENSG00000142224	IL19	interleukin 19
chr1	206898612	206898987	*	+ 2 fold & sig. in E2	E2 vs DMSO	1.93896167978449	0.00142440946377679	Intron (ENST00000391929.7/11009, intron 2 of 6)	779	ENSG00000162892	IL24	interleukin 24
chr1	206901294	206901523	*	+ 2 fold & sig. in E2	E2 vs DMSO	3.31586077763941	0.000292605213182808	Exon (ENST00000391929.7/11009, exon 5 of 7)	3461	ENSG00000162892	IL24	interleukin 24
chr1	206908987	206910238	*	+ 2 fold & sig. in E2	E2 vs DMSO	2.24578460096085	8.45894744312707e-07	Promoter	0	ENSG00000162894	FCMR	Fc fragment of IgM receptor
chr1	207240808	207241875	*	+ 2 fold & sig. in E2	E2 vs DMSO	1.17971456477698	0.0395897825235507	Intron (ENST00000634239.1/124904497, intron 1 of 3)	686	NA	NA	NA
chr1	207397402	207397893	*	+ 2 fold & sig. in E2	E2 vs DMSO	3.07284965915039	0.000586089652911588	Distal Intergenic	18343	NA	NA	NA
chr1	207565203	207565916	*	+ 2 fold & sig. in E2	E2 vs DMSO	2.47244220853232	0.0172839891882254	Exon (ENST00000400960.7/1378, exon 16 of 39)	68862	ENSG00000203710	CR1	complement C3b/C4b receptor 1 (Knops blood group)
chr1	20784620	20785190	*	+ 2 fold & sig. in E2	E2 vs DMSO	2.81582156397475	0.000244244332336065	Intron (ENST00000438032.6/50809, intron 1 of 12)	1093	ENSG00000127483	HP1BP3	heterochromatin protein 1 binding protein 3
chr1	208069011	208069667	*	+ 2 fold & sig. in E2	E2 vs DMSO	3.95084823550931	0.000991046224265394	Intron (ENST00000367033.4/5362, intron 12 of 31)	-28747	ENSG00000076356	PLXNA2	plexin A2
chr1	208476351	208477200	*	+ 2 fold & sig. in E2	E2 vs DMSO	2.27148991084365	0.00158471765282994	Distal Intergenic	137095	NA	LINC01735	long intergenic non-protein coding RNA 1735
chr1	20869732	20870264	*	+ 2 fold & sig. in E2	E2 vs DMSO	8.15717372835426	7.30272010465615e-05	Intron (ENST00000374935.7/8672, intron 16 of 32)	-18464	ENSG00000075151	EIF4G3	eukaryotic translation initiation factor 4 gamma 3
chr1	209546108	209546980	*	+ 2 fold & sig. in E2	E2 vs DMSO	2.37530144953034	0.000964602968615709	Exon (ENST00000424696.6/105372898, exon 3 of 7)	600	NA	LOC105372898	uncharacterized LOC105372898
chr1	209587471	209588308	*	+ 2 fold & sig. in E2	E2 vs DMSO	1.58867687349306	0.0448223494677821	Intron (ENST00000361322.3/57172, intron 1 of 12)	3742	ENSG00000008118	CAMK1G	calcium/calmodulin dependent protein kinase IG
chr1	210366559	210367558	*	+ 2 fold & sig. in E2	E2 vs DMSO	1.75306617440726	0.000212945938135879	Promoter	0	NA	NA	NA
chr1	211258430	211259590	*	+ 2 fold & sig. in E2	E2 vs DMSO	3.62117905684204	6.30792414403525e-11	Promoter	0	ENSG00000117625	RCOR3	REST corepressor 3
chr1	211260274	211260891	*	+ 2 fold & sig. in E2	E2 vs DMSO	2.07609694114657	0.00429691133982681	Promoter	299	ENSG00000117625	RCOR3	REST corepressor 3
chr1	211510028	211510518	*	+ 2 fold & sig. in E2	E2 vs DMSO	6.61272370116278	0.0171798944126973	Distal Intergenic	-17866	ENSG00000198570	RD3	RD3 regulator of GUCY2D
chr1	212046766	212047635	*	+ 2 fold & sig. in E2	E2 vs DMSO	1.87170126936784	0.0199930717178963	Exon (ENST00000542077.5/51514, exon 3 of 14)	4371	ENSG00000220749	RPL21P28	ribosomal protein L21 pseudogene 28
chr1	212088303	212088881	*	+ 2 fold & sig. in E2	E2 vs DMSO	2.24960240005743	0.033895419989704	Intron (ENST00000542077.5/51514, intron 12 of 13)	7934	ENSG00000143476	DTL	denticleless E3 ubiquitin protein ligase homolog
chr1	212121624	212122272	*	+ 2 fold & sig. in E2	E2 vs DMSO	3.54881498157936	8.38456286224957e-05	Distal Intergenic	20978	ENSG00000143476	DTL	denticleless E3 ubiquitin protein ligase homolog
chr1	212124827	212125199	*	+ 2 fold & sig. in E2	E2 vs DMSO	2.27867796646863	0.0459644368059574	Distal Intergenic	24181	ENSG00000143476	DTL	denticleless E3 ubiquitin protein ligase homolog
chr1	212147328	212148102	*	+ 2 fold & sig. in E2	E2 vs DMSO	2.01243804046907	6.69979926850798e-05	Distal Intergenic	46682	ENSG00000143476	DTL	denticleless E3 ubiquitin protein ligase homolog
chr1	212284638	212285818	*	+ 2 fold & sig. in E2	E2 vs DMSO	2.37597534331704	1.56906506836246e-08	Promoter	0	ENSG00000226251	LINC02608	long intergenic non-protein coding RNA 2608
chr1	21254764	21254964	*	+ 2 fold & sig. in E2	E2 vs DMSO	2.31577005066717	1.28124956982354e-05	Intron (ENST00000415912.6/1889, intron 8 of 18)	1753	ENSG00000117298	ECE1	endothelin converting enzyme 1
chr1	21294250	21295135	*	+ 2 fold & sig. in E2	E2 vs DMSO	1.6255402722769	0.00568728698402641	Promoter	0	ENSG00000117298	ECE1	endothelin converting enzyme 1
chr1	21329405	21329933	*	+ 2 fold & sig. in E2	E2 vs DMSO	1.47708902146267	0.00104137752224594	Intron (ENST00000415912.6/1889, intron 1 of 18)	15204	ENSG00000117298	ECE1	endothelin converting enzyme 1
chr1	21345281	21346145	*	+ 2 fold & sig. in E2	E2 vs DMSO	1.91283493457374	0.000892879575427265	Promoter	0	ENSG00000117298	ECE1	endothelin converting enzyme 1
chr1	21368170	21369090	*	+ 2 fold & sig. in E2	E2 vs DMSO	1.53765644051304	0.0138863380594634	Distal Intergenic	-22598	ENSG00000117298	ECE1	endothelin converting enzyme 1
chr1	21401647	21402127	*	+ 2 fold & sig. in E2	E2 vs DMSO	6.37918504814626	0.0282084415071289	Distal Intergenic	11166	NA	LOC105376832	uncharacterized LOC105376832
chr1	214327527	214327958	*	+ 2 fold & sig. in E2	E2 vs DMSO	3.29124116263233	0.00818723929619939	Promoter	33	ENSG00000143499	SMYD2	SET and MYND domain containing 2
chr1	214700287	214701057	*	+ 2 fold & sig. in E2	E2 vs DMSO	2.32161015200174	0.000459644128795824	Distal Intergenic	45139	ENSG00000117724	CENPF	centromere protein F
chr1	21522472	21522894	*	+ 2 fold & sig. in E2	E2 vs DMSO	6.10493662759661	0.0485030196886864	Intron (ENST00000468526.1/249, intron 1 of 4)	13044	ENSG00000162551	ALPL	alkaline phosphatase, biomineralization associated
chr1	215473664	215474295	*	+ 2 fold & sig. in E2	E2 vs DMSO	3.57936447413441	6.21140422216871e-10	Distal Intergenic	-93009	ENSG00000136636	KCTD3	potassium channel tetramerization domain containing 3
chr1	215475746	215476785	*	+ 2 fold & sig. in E2	E2 vs DMSO	1.28099775844591	0.00427834856829886	Distal Intergenic	-90519	ENSG00000136636	KCTD3	potassium channel tetramerization domain containing 3
chr1	215481849	215482630	*	+ 2 fold & sig. in E2	E2 vs DMSO	3.26355548164871	1.64364653062135e-09	Distal Intergenic	-84674	ENSG00000136636	KCTD3	potassium channel tetramerization domain containing 3
chr1	215517488	215517994	*	+ 2 fold & sig. in E2	E2 vs DMSO	1.87301086206663	0.0479301826036429	Distal Intergenic	-49310	ENSG00000136636	KCTD3	potassium channel tetramerization domain containing 3
chr1	21586890	21587781	*	+ 2 fold & sig. in E2	E2 vs DMSO	2.0360086912713	4.18050529461116e-07	Promoter	418	NA	LINC02596	long intergenic non-protein coding RNA 2596
chr1	21621284	21622439	*	+ 2 fold & sig. in E2	E2 vs DMSO	2.72132570767768	1.50650542349e-08	Promoter	129	ENSG00000076864	RAP1GAP	RAP1 GTPase activating protein
chr1	21626566	21627351	*	+ 2 fold & sig. in E2	E2 vs DMSO	1.50973345552545	0.000131542670064642	Intron (ENST00000471600.6/5909, intron 2 of 24)	-3998	ENSG00000076864	RAP1GAP	RAP1 GTPase activating protein
chr1	217363038	217363754	*	+ 2 fold & sig. in E2	E2 vs DMSO	1.38291711521239	0.00654136216908615	Distal Intergenic	135010	ENSG00000092978	GPATCH2	G-patch domain containing 2
chr1	21869616	21870288	*	+ 2 fold & sig. in E2	E2 vs DMSO	2.75483058739438	0.00350356050956398	Exon (ENST00000644714.1/3339, exon 3 of 6)	2089	ENSG00000142798	HSPG2	heparan sulfate proteoglycan 2
chr1	223654886	223655737	*	+ 2 fold & sig. in E2	E2 vs DMSO	1.80484596327206	0.00149923649029158	Promoter	-487	ENSG00000203697	CAPN8	calpain 8
chr1	223665456	223666260	*	+ 2 fold & sig. in E2	E2 vs DMSO	1.15725678352833	0.00577618998027852	Promoter	0	ENSG00000203697	CAPN8	calpain 8
chr1	223700561	223701561	*	+ 2 fold & sig. in E2	E2 vs DMSO	3.19578931189037	8.75974324297199e-10	Promoter	-32	ENSG00000162909	CAPN2	calpain 2
chr1	223706377	223706912	*	+ 2 fold & sig. in E2	E2 vs DMSO	1.5436125030923	0.0218350883505358	Intron (ENST00000433674.6/824, intron 1 of 20)	4732	ENSG00000162909	CAPN2	calpain 2
chr1	223712234	223713122	*	+ 2 fold & sig. in E2	E2 vs DMSO	3.70233364249652	1.46358914006154e-05	Promoter	0	ENSG00000162909	CAPN2	calpain 2
chr1	223720593	223721697	*	+ 2 fold & sig. in E2	E2 vs DMSO	1.22891875630992	0.00713932956339721	Intron (ENST00000433674.6/824, intron 2 of 20)	8054	ENSG00000162909	CAPN2	calpain 2
chr1	22414098	22414777	*	+ 2 fold & sig. in E2	E2 vs DMSO	1.51225073807515	0.000159545841995161	Distal Intergenic	-14061	ENSG00000184677	ZBTB40	zinc finger and BTB domain containing 40
chr1	224142732	224143545	*	+ 2 fold & sig. in E2	E2 vs DMSO	2.91407436248491	0.000158449063930463	Intron (ENST00000424254.6/23219, intron 3 of 3)	28514	ENSG00000143756	FBXO28	F-box protein 28
chr1	224204774	224205920	*	+ 2 fold & sig. in E2	E2 vs DMSO	1.09647775418447	0.0104470702171149	Distal Intergenic	4519	ENSG00000232628	LOC101927143	uncharacterized LOC101927143
chr1	224212242	224213032	*	+ 2 fold & sig. in E2	E2 vs DMSO	2.79780364988147	0.000371334670288633	Promoter	247	ENSG00000232628	LOC101927143	uncharacterized LOC101927143
chr1	224259789	224260519	*	+ 2 fold & sig. in E2	E2 vs DMSO	1.12349509963181	0.0286633016251164	Intron (ENST00000489194.5/4931, intron 1 of 4)	-2648	NA	MIR320B2	microRNA 320b-2
chr1	2243012	2243830	*	+ 2 fold & sig. in E2	E2 vs DMSO	3.06395380734633	2.33945756247554e-09	Intron (ENST00000704337.1/6497, intron 1 of 3)	-4166	ENSG00000157933	SKI	SKI proto-oncogene
chr1	22447310	22447933	*	+ 2 fold & sig. in E2	E2 vs DMSO	1.838455830133	0.000587122231899385	Intron (ENST00000650433.1/9923, intron 1 of 8)	-3918	ENSG00000184677	ZBTB40	zinc finger and BTB domain containing 40
chr1	22450356	22450972	*	+ 2 fold & sig. in E2	E2 vs DMSO	1.81109194511797	0.000367015181112243	Promoter	-879	ENSG00000184677	ZBTB40	zinc finger and BTB domain containing 40
chr1	22451574	22452579	*	+ 2 fold & sig. in E2	E2 vs DMSO	1.53462379915933	2.84811962611353e-05	Promoter	0	ENSG00000184677	ZBTB40	zinc finger and BTB domain containing 40
chr1	22469454	22469820	*	+ 2 fold & sig. in E2	E2 vs DMSO	4.65902247393069	4.15479763054906e-09	Intron (ENST00000650433.1/9923, intron 1 of 8)	17587	ENSG00000184677	ZBTB40	zinc finger and BTB domain containing 40
chr1	22479133	22479536	*	+ 2 fold & sig. in E2	E2 vs DMSO	3.13545606491927	0.0187183601638028	Intron (ENST00000650433.1/9923, intron 1 of 8)	27266	ENSG00000184677	ZBTB40	zinc finger and BTB domain containing 40
chr1	22526929	22527856	*	+ 2 fold & sig. in E2	E2 vs DMSO	2.73662554403742	8.14717319472477e-05	3' UTR	-35633	ENSG00000070886	EPHA8	EPH receptor A8
chr1	225450514	225451036	*	+ 2 fold & sig. in E2	E2 vs DMSO	2.84328315087754	9.94110173135665e-07	Exon (ENST00000651771.1/105373110, exon 3 of 4)	14247	NA	LINC02765	long intergenic non-protein coding RNA 2765
chr1	225454074	225455238	*	+ 2 fold & sig. in E2	E2 vs DMSO	1.42216403702083	7.7811290505176e-05	Intron (ENST00000654950.1/105373110, intron 1 of 1)	10045	NA	LINC02765	long intergenic non-protein coding RNA 2765
chr1	225802666	225803562	*	+ 2 fold & sig. in E2	E2 vs DMSO	3.01358347478491	0.0011586150965489	Exon (ENST00000434499.2/ENST00000434499.2, exon 1 of 1)	-6562	ENSG00000143819	EPHX1	epoxide hydrolase 1
chr1	22625697	22626419	*	+ 2 fold & sig. in E2	E2 vs DMSO	1.85308616654862	0.000263644826164866	Distal Intergenic	6947	ENSG00000276835	MIR6127	microRNA 6127
chr1	226448156	226448918	*	+ 2 fold & sig. in E2	E2 vs DMSO	2.04023758245281	0.00952083048989496	Distal Intergenic	-40002	ENSG00000143799	PARP1	poly(ADP-ribose) polymerase 1
chr1	228250385	228251112	*	+ 2 fold & sig. in E2	E2 vs DMSO	2.63250849938972	0.00110391807339246	Intron (ENST00000570156.7/84033, intron 15 of 115)	24221	NA	NA	NA
chr1	228735103	228735704	*	+ 2 fold & sig. in E2	E2 vs DMSO	8.12546205210366	0.000163948367607022	Promoter	0	ENSG00000116574	RHOU	ras homolog family member U
chr1	228736025	228736642	*	+ 2 fold & sig. in E2	E2 vs DMSO	2.04980051420021	0.00349202761118549	Intron (ENST00000366691.4/58480, intron 1 of 2)	546	ENSG00000116574	RHOU	ras homolog family member U
chr1	228809629	228810646	*	+ 2 fold & sig. in E2	E2 vs DMSO	2.07712279329186	5.70032210369949e-08	Distal Intergenic	74150	ENSG00000116574	RHOU	ras homolog family member U
chr1	228860979	228861846	*	+ 2 fold & sig. in E2	E2 vs DMSO	1.86621500111918	1.15898646757512e-05	Distal Intergenic	125500	ENSG00000116574	RHOU	ras homolog family member U
chr1	229003391	229004111	*	+ 2 fold & sig. in E2	E2 vs DMSO	2.58770719901893	1.35204471642188e-06	Distal Intergenic	90784	NA	LINC02815	long intergenic non-protein coding RNA 2815
chr1	229006178	229006905	*	+ 2 fold & sig. in E2	E2 vs DMSO	2.07676765607282	2.4919868816109e-06	Distal Intergenic	87990	NA	LINC02815	long intergenic non-protein coding RNA 2815
chr1	229147693	229149236	*	+ 2 fold & sig. in E2	E2 vs DMSO	2.96534716983067	7.15406698171429e-12	Intron (ENST00000662083.1/105373158, intron 1 of 4)	34859	NA	LINC02815	long intergenic non-protein coding RNA 2815
chr1	229162190	229162547	*	+ 2 fold & sig. in E2	E2 vs DMSO	2.22452683633069	0.000273987418650944	Intron (ENST00000662083.1/105373158, intron 1 of 4)	21548	NA	LINC02815	long intergenic non-protein coding RNA 2815
chr1	229164885	229165950	*	+ 2 fold & sig. in E2	E2 vs DMSO	3.66401229065446	4.71324552007391e-14	Intron (ENST00000662083.1/105373158, intron 1 of 4)	18145	NA	LINC02815	long intergenic non-protein coding RNA 2815
chr1	229203249	229203785	*	+ 2 fold & sig. in E2	E2 vs DMSO	1.87395136453152	0.0449362122637398	Intron (ENST00000666388.1/105373158, intron 1 of 2)	1643	NA	LINC02815	long intergenic non-protein coding RNA 2815
chr1	230084150	230085242	*	+ 2 fold & sig. in E2	E2 vs DMSO	1.72909267387708	0.000185805152892066	Intron (ENST00000494106.1/2590, intron 1 of 6)	16891	ENSG00000143641	GALNT2	polypeptide N-acetylgalactosaminyltransferase 2
chr1	230500272	230500951	*	+ 2 fold & sig. in E2	E2 vs DMSO	3.16823556376913	0.000917601285565374	Intron (ENST00000689608.1/105373164, intron 2 of 3)	73686	NA	LOC105373164	uncharacterized LOC105373164
chr1	231770862	231771227	*	+ 2 fold & sig. in E2	E2 vs DMSO	6.38192517098271	0.0285830652856045	3' UTR	-47678	ENSG00000162946	DISC1	DISC1 scaffold protein
chr1	231982450	231982839	*	+ 2 fold & sig. in E2	E2 vs DMSO	1.68260903367141	0.0378771611181822	Intron (ENST00000439617.8/27185, intron 10 of 12)	56616	ENSG00000226758	DISC1-IT1	DISC1 intronic transcript 1
chr1	231986518	231987693	*	+ 2 fold & sig. in E2	E2 vs DMSO	2.9991518083377	5.62290715887044e-09	Intron (ENST00000439617.8/27185, intron 10 of 12)	60684	ENSG00000226758	DISC1-IT1	DISC1 intronic transcript 1
chr1	232164106	232165086	*	+ 2 fold & sig. in E2	E2 vs DMSO	2.55234014622208	1.94257235053052e-06	Intron (ENST00000428673.1/ENST00000428673.1, intron 1 of 2)	237680	ENSG00000116991	SIPA1L2	signal induced proliferation associated 1 like 2
chr1	232192549	232193573	*	+ 2 fold & sig. in E2	E2 vs DMSO	2.71444770129368	4.55685846269475e-07	Distal Intergenic	209193	ENSG00000116991	SIPA1L2	signal induced proliferation associated 1 like 2
chr1	233326960	233328343	*	+ 2 fold & sig. in E2	E2 vs DMSO	1.24238084076662	0.0263440052560377	Promoter	0	ENSG00000143674	MAP3K21	mitogen-activated protein kinase kinase kinase 21
chr1	233543307	233544085	*	+ 2 fold & sig. in E2	E2 vs DMSO	1.54723124175107	0.000394506695008886	Exon (ENST00000659612.1/ENST00000659612.1, exon 1 of 4)	-70021	ENSG00000135750	KCNK1	potassium two pore domain channel subfamily K member 1
chr1	23393685	23394641	*	+ 2 fold & sig. in E2	E2 vs DMSO	2.27830816133174	5.98431594573411e-07	Exon (ENST00000450454.7/6920, exon 8 of 11)	23431	ENSG00000249087	ZNF436-AS1	ZNF436 antisense RNA 1
chr1	233972547	233973314	*	+ 2 fold & sig. in E2	E2 vs DMSO	2.51671595163119	2.21155279304547e-08	Intron (ENST00000366618.8/148641, intron 2 of 7)	67871	ENSG00000183780	SLC35F3	solute carrier family 35 member F3
chr1	233981141	233981594	*	+ 2 fold & sig. in E2	E2 vs DMSO	6.75226845084058	0.0138924141391369	Intron (ENST00000366618.8/148641, intron 2 of 7)	76465	ENSG00000183780	SLC35F3	solute carrier family 35 member F3
chr1	234046925	234047690	*	+ 2 fold & sig. in E2	E2 vs DMSO	1.02581212903563	0.0413468549158771	Intron (ENST00000366618.8/148641, intron 2 of 7)	142249	ENSG00000183780	SLC35F3	solute carrier family 35 member F3
chr1	234553004	234553798	*	+ 2 fold & sig. in E2	E2 vs DMSO	3.43170023726821	1.93776871103537e-11	Exon (ENST00000664950.1/ENST00000664950.1, exon 2 of 2)	-21201	ENSG00000231768	LINC01354	long intergenic non-protein coding RNA 1354
chr1	234599661	234600493	*	+ 2 fold & sig. in E2	E2 vs DMSO	2.32131766832428	0.000337830015501808	Exon (ENST00000690958.1/ENST00000690958.1, exon 1 of 1)	6386	NA	NA	NA
chr1	234610612	234611583	*	+ 2 fold & sig. in E2	E2 vs DMSO	2.28430429751751	0.000101871789623955	Promoter	-434	ENSG00000168264	IRF2BP2	interferon regulatory factor 2 binding protein 2
chr1	234612590	234613076	*	+ 2 fold & sig. in E2	E2 vs DMSO	1.40036332516413	0.00489232813203417	Distal Intergenic	-2412	ENSG00000168264	IRF2BP2	interferon regulatory factor 2 binding protein 2
chr1	234667990	234668669	*	+ 2 fold & sig. in E2	E2 vs DMSO	3.61182699883189	0.00256317790929606	Intron (ENST00000664534.1/105373209, intron 1 of 2)	-5427	NA	LOC105373209	uncharacterized LOC105373209
chr1	234866343	234866586	*	+ 2 fold & sig. in E2	E2 vs DMSO	2.36662149503037	0.0245572030384563	Intron (ENST00000651370.1/107985365, intron 1 of 1)	66067	NA	LOC107985365	uncharacterized LOC107985365
chr1	234867060	234867736	*	+ 2 fold & sig. in E2	E2 vs DMSO	2.90781729474683	6.04945670422293e-09	Intron (ENST00000651370.1/107985365, intron 1 of 1)	64917	NA	LOC107985365	uncharacterized LOC107985365
chr1	234874544	234874803	*	+ 2 fold & sig. in E2	E2 vs DMSO	1.48294969054189	0.018960283463156	Intron (ENST00000651370.1/107985365, intron 1 of 1)	57850	NA	LOC107985365	uncharacterized LOC107985365
chr1	234960763	234961133	*	+ 2 fold & sig. in E2	E2 vs DMSO	2.81111180567795	2.43630318448735e-06	Intron (ENST00000418557.1/101927851, intron 1 of 3)	1012	ENSG00000238005	LOC101927851	uncharacterized LOC101927851
chr1	234963129	234964459	*	+ 2 fold & sig. in E2	E2 vs DMSO	3.35954989931648	1.65525660671386e-13	Promoter	0	ENSG00000238005	LOC101927851	uncharacterized LOC101927851
chr1	234973603	234974224	*	+ 2 fold & sig. in E2	E2 vs DMSO	2.51437374693932	1.29806766545524e-07	Distal Intergenic	-3541	ENSG00000238005	LOC101927851	uncharacterized LOC101927851
chr1	234987142	234988154	*	+ 2 fold & sig. in E2	E2 vs DMSO	1.41768809130524	0.00259801845954256	Distal Intergenic	-17080	ENSG00000238005	LOC101927851	uncharacterized LOC101927851
chr1	234997116	234997868	*	+ 2 fold & sig. in E2	E2 vs DMSO	1.37574106230312	0.00135885309491184	Distal Intergenic	-27054	ENSG00000238005	LOC101927851	uncharacterized LOC101927851
chr1	235006577	235007179	*	+ 2 fold & sig. in E2	E2 vs DMSO	3.33651375413343	0.00742379752265358	Distal Intergenic	-36515	ENSG00000238005	LOC101927851	uncharacterized LOC101927851
chr1	235060481	235061362	*	+ 2 fold & sig. in E2	E2 vs DMSO	1.70062947888732	5.158873902645e-06	Distal Intergenic	8434	NA	LINC01348	long intergenic non-protein coding RNA 1348
chr1	235062195	235062652	*	+ 2 fold & sig. in E2	E2 vs DMSO	2.37011520663795	2.49779590678582e-05	Distal Intergenic	7144	NA	LINC01348	long intergenic non-protein coding RNA 1348
chr1	2350707	2351216	*	+ 2 fold & sig. in E2	E2 vs DMSO	3.03909067177457	0.0205481066463994	Exon (ENST00000602865.1/100129534, exon 1 of 1)	641	ENSG00000269896	LOC100129534	small nuclear ribonucleoprotein polypeptide N pseudogene
chr1	235079354	235080020	*	+ 2 fold & sig. in E2	E2 vs DMSO	2.36918189754837	2.883894633465e-07	Distal Intergenic	-9540	NA	LINC01348	long intergenic non-protein coding RNA 1348
chr1	235083188	235083519	*	+ 2 fold & sig. in E2	E2 vs DMSO	7.17882030748917	0.00464583046912431	Distal Intergenic	-13374	NA	LINC01348	long intergenic non-protein coding RNA 1348
chr1	23534197	23534558	*	+ 2 fold & sig. in E2	E2 vs DMSO	1.94281284292606	0.0341733702552848	Distal Intergenic	-2964	ENSG00000007968	E2F2	E2F transcription factor 2
chr1	235642620	235643270	*	+ 2 fold & sig. in E2	E2 vs DMSO	4.05212272149417	4.73210543243745e-07	Intron (ENST00000391854.7/2786, intron 1 of 3)	6514	ENSG00000168243	GNG4	G protein subunit gamma 4
chr1	23585403	23586236	*	+ 2 fold & sig. in E2	E2 vs DMSO	2.5904126313692	1.50074294117557e-07	Exon (ENST00000648225.1/107984928, exon 2 of 4)	3908	ENSG00000197880	MDS2	myelodysplastic syndrome 2 translocation associated
chr1	23616927	23617704	*	+ 2 fold & sig. in E2	E2 vs DMSO	2.75171655298121	1.22603201453866e-05	Intron (ENST00000477916.5/259283, intron 2 of 6)	-9630	ENSG00000197880	MDS2	myelodysplastic syndrome 2 translocation associated
chr1	24001233	24001937	*	+ 2 fold & sig. in E2	E2 vs DMSO	2.35439486398492	9.724804013079e-05	Distal Intergenic	-20306	ENSG00000188529	SRSF10	serine and arginine rich splicing factor 10
chr1	24011488	24012237	*	+ 2 fold & sig. in E2	E2 vs DMSO	1.45739972684123	0.0207471913218077	Distal Intergenic	-28598	NA	LOC107984931	uncharacterized LOC107984931
chr1	24018456	24019309	*	+ 2 fold & sig. in E2	E2 vs DMSO	1.79451593310831	1.25555395074378e-05	Distal Intergenic	-21526	NA	LOC107984931	uncharacterized LOC107984931
chr1	240287716	240288356	*	+ 2 fold & sig. in E2	E2 vs DMSO	3.28429897571015	0.0105703624522871	Intron (ENST00000319653.14/56776, intron 7 of 17)	2485	ENSG00000155816	FMN2	formin 2
chr1	240435874	240436650	*	+ 2 fold & sig. in E2	E2 vs DMSO	1.94387107052432	8.9592811849214e-05	Intron (ENST00000319653.14/56776, intron 15 of 17)	-20843	ENSG00000155816	FMN2	formin 2
chr1	240475818	240476406	*	+ 2 fold & sig. in E2	E2 vs DMSO	6.2912195674098	0.0324398278921781	Distal Intergenic	3720	ENSG00000155816	FMN2	formin 2
chr1	2411741	2412874	*	+ 2 fold & sig. in E2	E2 vs DMSO	2.04633002364458	9.35354578676787e-05	Promoter	0	ENSG00000157911	PEX10	peroxisomal biogenesis factor 10
chr1	241265062	241265828	*	+ 2 fold & sig. in E2	E2 vs DMSO	2.07256556936169	0.000960680100933048	Intron (ENST00000690539.1/6000, intron 2 of 16)	-78170	ENSG00000182901	RGS7	regulator of G protein signaling 7
chr1	241800933	241801594	*	+ 2 fold & sig. in E2	E2 vs DMSO	3.74728146312845	6.44677970445553e-06	3' UTR	30478	ENSG00000162843	WDR64	WD repeat domain 64
chr1	241816988	241817701	*	+ 2 fold & sig. in E2	E2 vs DMSO	3.53103706729414	1.87116018581539e-07	Intron (ENST00000684005.1/124904603, intron 1 of 5)	-30266	ENSG00000174371	EXO1	exonuclease 1
chr1	24364508	24365033	*	+ 2 fold & sig. in E2	E2 vs DMSO	3.0796409360197	0.0268476784124015	Intron (ENST00000337248.9/90529, intron 7 of 8)	14790	ENSG00000001460	STPG1	sperm tail PG-rich repeat containing 1
chr1	2447580	2448337	*	+ 2 fold & sig. in E2	E2 vs DMSO	1.35154550569245	0.0184334871835919	Intron (ENST00000609981.5/9651, intron 2 of 3)	-19122	ENSG00000149527	PLCH2	phospholipase C eta 2
chr1	244989657	244990397	*	+ 2 fold & sig. in E2	E2 vs DMSO	2.44370861428119	0.000192237886110951	Intron (ENST00000366523.6/84288, intron 2 of 7)	-11756	NA	LOC107985725	uncharacterized LOC107985725
chr1	245336154	245336745	*	+ 2 fold & sig. in E2	E2 vs DMSO	2.75102420531146	0.046771569467929	Intron (ENST00000407071.7/55083, intron 2 of 14)	-16933	ENSG00000162849	KIF26B	kinesin family member 26B
chr1	24567529	24568506	*	+ 2 fold & sig. in E2	E2 vs DMSO	2.12314879829343	8.54540267147895e-09	Intron (ENST00000374392.3/400746, intron 1 of 3)	11442	ENSG00000184454	NCMAP	non-compact myelin associated protein
chr1	245802840	245803497	*	+ 2 fold & sig. in E2	E2 vs DMSO	1.81304025807188	0.025454760738105	Intron (ENST00000366516.5/64754, intron 5 of 6)	10914	ENSG00000185420	SMYD3	SET and MYND domain containing 3
chr1	245859508	245860212	*	+ 2 fold & sig. in E2	E2 vs DMSO	6.10380068144827	0.0489306584222239	Promoter	-861	ENSG00000185420	SMYD3	SET and MYND domain containing 3
chr1	24605574	24606234	*	+ 2 fold & sig. in E2	E2 vs DMSO	1.45938425502787	0.0211094580881163	3' UTR	16110	ENSG00000184454	NCMAP	non-compact myelin associated protein
chr1	246219251	246220188	*	+ 2 fold & sig. in E2	E2 vs DMSO	1.75528282342354	0.00282467347726825	Intron (ENST00000630181.2/64754, intron 5 of 11)	-25524	ENSG00000185420	SMYD3	SET and MYND domain containing 3
chr1	246632395	246633185	*	+ 2 fold & sig. in E2	E2 vs DMSO	1.93792366030209	0.00547735477052301	Exon (ENST00000449978.2/ENST00000449978.2, exon 1 of 2)	-56862	NA	LOC102724382	uncharacterized LOC102724382
chr1	25458674	25459301	*	+ 2 fold & sig. in E2	E2 vs DMSO	2.2325377758749	0.00109220620765594	Exon (ENST00000374343.5/55219, exon 6 of 11)	9781	ENSG00000204178	MACO1	macoilin 1
chr1	25476106	25476924	*	+ 2 fold & sig. in E2	E2 vs DMSO	4.64705661426179	1.31147622746158e-11	Intron (ENST00000399766.7/55219, intron 4 of 8)	27213	ENSG00000204178	MACO1	macoilin 1
chr1	25756791	25757895	*	+ 2 fold & sig. in E2	E2 vs DMSO	2.67726042470692	2.718939571413e-08	Intron (ENST00000374332.9/57134, intron 5 of 11)	-14174	ENSG00000117643	MAN1C1	mannosidase alpha class 1C member 1
chr1	27349050	27350071	*	+ 2 fold & sig. in E2	E2 vs DMSO	1.43397836215566	0.00125239948878079	Promoter	0	ENSG00000142765	SYTL1	synaptotagmin like 1
chr1	27557213	27558511	*	+ 2 fold & sig. in E2	E2 vs DMSO	2.32948547979829	2.73734164037887e-09	Promoter	0	ENSG00000126705	AHDC1	AT-hook DNA binding motif containing 1
chr1	27563389	27563940	*	+ 2 fold & sig. in E2	E2 vs DMSO	1.62110075465342	0.00599537533114661	Intron (ENST00000247087.10/27245, intron 1 of 5)	4320	ENSG00000126705	AHDC1	AT-hook DNA binding motif containing 1
chr1	27644937	27645637	*	+ 2 fold & sig. in E2	E2 vs DMSO	2.18191577833232	0.0142588791449103	Distal Intergenic	-9752	ENSG00000000938	FGR	FGR proto-oncogene, Src family tyrosine kinase
chr1	28313687	28314692	*	+ 2 fold & sig. in E2	E2 vs DMSO	1.10940135471314	0.00872826395386856	Distal Intergenic	-14310	ENSG00000130772	MED18	mediator complex subunit 18
chr1	29227278	29228152	*	+ 2 fold & sig. in E2	E2 vs DMSO	1.28175578098334	0.00204920308364682	Intron (ENST00000263702.11/51102, intron 1 of 9)	2739	ENSG00000116353	MECR	mitochondrial trans-2-enoyl-CoA reductase
chr1	29984987	29985890	*	+ 2 fold & sig. in E2	E2 vs DMSO	1.78037109602904	0.00294991882653454	Distal Intergenic	51722	ENSG00000233399	LINC01648	long intergenic non-protein coding RNA 1648
chr1	29998516	29999225	*	+ 2 fold & sig. in E2	E2 vs DMSO	2.28736645120004	0.000550349824684332	Distal Intergenic	38387	ENSG00000233399	LINC01648	long intergenic non-protein coding RNA 1648
chr1	30302711	30303713	*	+ 2 fold & sig. in E2	E2 vs DMSO	4.40664220972959	3.69844352180995e-14	Distal Intergenic	-265099	ENSG00000233399	LINC01648	long intergenic non-protein coding RNA 1648
chr1	30345339	30346320	*	+ 2 fold & sig. in E2	E2 vs DMSO	2.35350538435978	6.82533369798347e-09	Distal Intergenic	-307727	ENSG00000233399	LINC01648	long intergenic non-protein coding RNA 1648
chr1	30382507	30383578	*	+ 2 fold & sig. in E2	E2 vs DMSO	3.0343332079134	1.00540085856619e-10	Distal Intergenic	332557	ENSG00000162510	MATN1	matrilin 1
chr1	30397670	30398731	*	+ 2 fold & sig. in E2	E2 vs DMSO	4.69603480446169	2.33182315684221e-06	Distal Intergenic	317404	ENSG00000162510	MATN1	matrilin 1
chr1	30461432	30462362	*	+ 2 fold & sig. in E2	E2 vs DMSO	3.81176186821889	2.78479666512444e-12	Distal Intergenic	253773	ENSG00000162510	MATN1	matrilin 1
chr1	30806945	30807712	*	+ 2 fold & sig. in E2	E2 vs DMSO	1.93374981542274	0.0381880053345972	Distal Intergenic	-16505	ENSG00000223382	LINC01778	long intergenic non-protein coding RNA 1778
chr1	30815524	30816085	*	+ 2 fold & sig. in E2	E2 vs DMSO	1.95051772874636	0.00218151242768031	Exon (ENST00000440358.1/ENST00000440358.1, exon 1 of 2)	-8132	ENSG00000223382	LINC01778	long intergenic non-protein coding RNA 1778
chr1	30816239	30817258	*	+ 2 fold & sig. in E2	E2 vs DMSO	1.03864397240645	0.0181874942386194	Distal Intergenic	-6959	ENSG00000223382	LINC01778	long intergenic non-protein coding RNA 1778
chr1	31186514	31187370	*	+ 2 fold & sig. in E2	E2 vs DMSO	3.04155685075749	1.03971269339297e-10	Intron (ENST00000373736.7/79570, intron 2 of 6)	783	ENSG00000084628	NKAIN1	sodium/potassium transporting ATPase interacting 1
chr1	31258467	31259143	*	+ 2 fold & sig. in E2	E2 vs DMSO	6.97636470144311	0.00780030455266797	Distal Intergenic	1934	ENSG00000060688	SNRNP40	small nuclear ribonucleoprotein U5 subunit 40
chr1	31368440	31369305	*	+ 2 fold & sig. in E2	E2 vs DMSO	1.84124610771561	0.000522324020783313	Promoter	285	ENSG00000121769	FABP3	fatty acid binding protein 3
chr1	31769413	31770342	*	+ 2 fold & sig. in E2	E2 vs DMSO	1.39398785853973	0.000732272918467888	Distal Intergenic	-4520	ENSG00000121753	ADGRB2	adhesion G protein-coupled receptor B2
chr1	31798374	31799150	*	+ 2 fold & sig. in E2	E2 vs DMSO	1.99499707501588	0.000830881348993423	Promoter	0	ENSG00000134668	SPOCD1	SPOC domain containing 1
chr1	31830148	31831188	*	+ 2 fold & sig. in E2	E2 vs DMSO	4.5890561227251	4.76126152091062e-16	Distal Intergenic	-14126	ENSG00000134668	SPOCD1	SPOC domain containing 1
chr1	31842530	31843614	*	+ 2 fold & sig. in E2	E2 vs DMSO	3.89206980726356	1.25486020028511e-12	Exon (ENST00000453837.1/ENST00000453837.1, exon 2 of 2)	-26508	ENSG00000134668	SPOCD1	SPOC domain containing 1
chr1	31854958	31855773	*	+ 2 fold & sig. in E2	E2 vs DMSO	2.34400624434705	5.28048139192331e-06	Exon (ENST00000453837.1/ENST00000453837.1, exon 1 of 2)	-38936	ENSG00000134668	SPOCD1	SPOC domain containing 1
chr1	31880125	31881434	*	+ 2 fold & sig. in E2	E2 vs DMSO	1.90271573695976	3.16804464973369e-06	Intron (ENST00000602889.1/ENST00000602889.1, intron 1 of 1)	29846	ENSG00000184007	PTP4A2	protein tyrosine phosphatase 4A2
chr1	31938331	31938933	*	+ 2 fold & sig. in E2	E2 vs DMSO	2.57567524427323	0.000180648002068448	Promoter	0	ENSG00000184007	PTP4A2	protein tyrosine phosphatase 4A2
chr1	3213483	3214242	*	+ 2 fold & sig. in E2	E2 vs DMSO	3.48233834967454	1.54452615288614e-09	Intron (ENST00000511072.5/63976, intron 2 of 15)	-23689	ENSG00000142611	PRDM16	PR/SET domain 16
chr1	32239860	32241641	*	+ 2 fold & sig. in E2	E2 vs DMSO	1.15542280771699	0.00509103555014248	Promoter	0	NA	MTMR9LP	myotubularin related protein 9 like, pseudogene
chr1	32361706	32362634	*	+ 2 fold & sig. in E2	E2 vs DMSO	2.33177994376541	0.033246843241632	Promoter	0	ENSG00000225828	FAM229A	family with sequence similarity 229 member A
chr1	3261202	3262060	*	+ 2 fold & sig. in E2	E2 vs DMSO	2.66320268047518	3.36365383487743e-09	Intron (ENST00000511072.5/63976, intron 3 of 15)	17070	ENSG00000142611	PRDM16	PR/SET domain 16
chr1	33660326	33661054	*	+ 2 fold & sig. in E2	E2 vs DMSO	3.79060115328451	9.9263661242146e-06	Intron (ENST00000373381.9/114784, intron 26 of 70)	-33742	ENSG00000121904	CSMD2	CUB and Sushi multiple domains 2
chr1	3453051	3454437	*	+ 2 fold & sig. in E2	E2 vs DMSO	1.0942643821141	0.000223148854638262	Promoter	-228	ENSG00000130762	ARHGEF16	Rho guanine nucleotide exchange factor 16
chr1	34787710	34788644	*	+ 2 fold & sig. in E2	E2 vs DMSO	2.04036358533453	0.00989757057023706	Exon (ENST00000542839.1/ENST00000542839.1, exon 1 of 2)	-4355	ENSG00000187513	GJA4	gap junction protein alpha 4
chr1	34825101	34826188	*	+ 2 fold & sig. in E2	E2 vs DMSO	2.12746379468395	5.65625379936353e-05	Intron (ENST00000426886.1/105378642, intron 2 of 4)	32102	ENSG00000187513	GJA4	gap junction protein alpha 4
chr1	34831895	34832574	*	+ 2 fold & sig. in E2	E2 vs DMSO	2.96719482321286	0.0302519000167151	Intron (ENST00000426886.1/105378642, intron 2 of 4)	26471	ENSG00000163866	SMIM12	small integral membrane protein 12
chr1	3554825	3555929	*	+ 2 fold & sig. in E2	E2 vs DMSO	1.56015194471113	2.92483550926304e-05	Intron (ENST00000356575.9/1953, intron 4 of 36)	4861	ENSG00000207776	MIR551A	microRNA 551a
chr1	35593318	35594097	*	+ 2 fold & sig. in E2	E2 vs DMSO	2.9731348689704	0.000230578797227748	Intron (ENST00000373235.4/339488, intron 6 of 6)	5361	ENSG00000116819	TFAP2E	transcription factor AP-2 epsilon
chr1	35718478	35719303	*	+ 2 fold & sig. in E2	E2 vs DMSO	2.38486161247878	0.0449603242269419	Promoter	0	ENSG00000142686	C1orf216	chromosome 1 open reading frame 216
chr1	3611085	3611967	*	+ 2 fold & sig. in E2	E2 vs DMSO	3.71769133111459	5.62501688684822e-05	Promoter	0	ENSG00000162591	MEGF6	multiple EGF like domains 6
chr1	3624159	3625851	*	+ 2 fold & sig. in E2	E2 vs DMSO	2.00078799864997	0.000408781722868553	Promoter	0	ENSG00000158109	TPRG1L	tumor protein p63 regulated 1 like
chr1	3640134	3641090	*	+ 2 fold & sig. in E2	E2 vs DMSO	3.70457377811859	6.81190713015333e-14	Promoter	-509	ENSG00000116213	WRAP73	WD repeat containing, antisense to TP73
chr1	36415346	36416198	*	+ 2 fold & sig. in E2	E2 vs DMSO	1.55290976636942	0.002015316501603	3' UTR	2380	ENSG00000201448	SNORA63C	small nucleolar RNA, H/ACA box 63C
chr1	3649839	3650039	*	+ 2 fold & sig. in E2	E2 vs DMSO	6.73830928204217	0.0188369402607454	Promoter	0	ENSG00000116213	WRAP73	WD repeat containing, antisense to TP73
chr1	3652005	3652507	*	+ 2 fold & sig. in E2	E2 vs DMSO	7.59709954407818	0.00199194735241941	Promoter	-9	ENSG00000078900	TP73	tumor protein p73
chr1	36593769	36594341	*	+ 2 fold & sig. in E2	E2 vs DMSO	3.28260031131242	0.0083651222607146	Distal Intergenic	-110491	ENSG00000119535	CSF3R	colony stimulating factor 3 receptor
chr1	36753017	36753394	*	+ 2 fold & sig. in E2	E2 vs DMSO	2.5445796980608	0.00843766795455411	Distal Intergenic	16331	NA	NA	NA
chr1	3708757	3710264	*	+ 2 fold & sig. in E2	E2 vs DMSO	1.0119832146344	0.00566729529491765	Intron (ENST00000378295.9/7161, intron 4 of 13)	10699	ENSG00000078900	TP73	tumor protein p73
chr1	37124493	37125040	*	+ 2 fold & sig. in E2	E2 vs DMSO	2.95656978974778	0.02679423678484	Distal Intergenic	-8449	NA	NA	NA
chr1	37691524	37693046	*	+ 2 fold & sig. in E2	E2 vs DMSO	1.82836479387514	8.49314935682122e-06	Promoter	0	ENSG00000116922	C1orf109	chromosome 1 open reading frame 109
chr1	37722968	37724137	*	+ 2 fold & sig. in E2	E2 vs DMSO	1.94879802220732	0.000126014240252422	Exon (ENST00000432874.7/284656, exon 3 of 16)	-1111	ENSG00000183317	EPHA10	EPH receptor A10
chr1	37752356	37752976	*	+ 2 fold & sig. in E2	E2 vs DMSO	7.4447411848165	0.00162241177221747	Promoter	0	ENSG00000183317	EPHA10	EPH receptor A10
chr1	37793039	37794095	*	+ 2 fold & sig. in E2	E2 vs DMSO	5.18859547648984	1.65008811107991e-16	Promoter	0	ENSG00000185090	MANEAL	mannosidase endo-alpha like
chr1	37807409	37807968	*	+ 2 fold & sig. in E2	E2 vs DMSO	3.51470199575823	4.01325163086027e-05	Promoter	0	ENSG00000197982	C1orf122	chromosome 1 open reading frame 122
chr1	37808154	37808640	*	+ 2 fold & sig. in E2	E2 vs DMSO	4.14745987818406	8.6675921213769e-05	Promoter	0	ENSG00000196449	YRDC	yrdC N6-threonylcarbamoyltransferase domain containing
chr1	37854255	37854971	*	+ 2 fold & sig. in E2	E2 vs DMSO	2.44895501416193	0.00351217215073789	Intron (ENST00000373036.5/4520, intron 2 of 10)	3568	ENSG00000188786	MTF1	metal regulatory transcription factor 1
chr1	3831756	3832928	*	+ 2 fold & sig. in E2	E2 vs DMSO	3.26856114453548	4.90011100354802e-07	Promoter	-532	ENSG00000116198	CEP104	centrosomal protein 104
chr1	39116688	39117678	*	+ 2 fold & sig. in E2	E2 vs DMSO	1.71820931649844	0.00126441789062866	Intron (ENST00000361689.7/23499, intron 2 of 93)	11183	ENSG00000127603	MACF1	microtubule actin crosslinking factor 1
chr1	39142546	39143572	*	+ 2 fold & sig. in E2	E2 vs DMSO	2.04993530275137	7.61656862972701e-07	Intron (ENST00000361689.7/23499, intron 2 of 93)	-15292	ENSG00000127603	MACF1	microtubule actin crosslinking factor 1
chr1	39178544	39179353	*	+ 2 fold & sig. in E2	E2 vs DMSO	1.30318737514363	0.0461676311112104	Intron (ENST00000361689.7/23499, intron 2 of 93)	19680	ENSG00000127603	MACF1	microtubule actin crosslinking factor 1
chr1	39255188	39255976	*	+ 2 fold & sig. in E2	E2 vs DMSO	2.3167324008687	0.0371913591212706	Intron (ENST00000361689.7/23499, intron 5 of 93)	-12489	ENSG00000127603	MACF1	microtubule actin crosslinking factor 1
chr1	39901916	39902687	*	+ 2 fold & sig. in E2	E2 vs DMSO	1.26015385773974	0.0266272379288962	Promoter	0	ENSG00000116990	MYCL	MYCL proto-oncogene, bHLH transcription factor
chr1	40696332	40696954	*	+ 2 fold & sig. in E2	E2 vs DMSO	1.83127642539366	0.00102373950481469	Intron (ENST00000467203.5/4802, intron 1 of 5)	4042	ENSG00000066136	NFYC	nuclear transcription factor Y subunit gamma
chr1	40898232	40899976	*	+ 2 fold & sig. in E2	E2 vs DMSO	1.68938603004434	1.80438348322458e-06	Distal Intergenic	34318	NA	NA	NA
chr1	40901880	40902265	*	+ 2 fold & sig. in E2	E2 vs DMSO	1.33165159026437	0.0368529681903825	Distal Intergenic	37966	NA	NA	NA
chr1	40906625	40907414	*	+ 2 fold & sig. in E2	E2 vs DMSO	2.166306636928	0.000870989814851507	Distal Intergenic	42711	NA	NA	NA
chr1	40919280	40920116	*	+ 2 fold & sig. in E2	E2 vs DMSO	2.33046696818377	3.00611793250719e-07	Distal Intergenic	55366	NA	NA	NA
chr1	40979419	40980011	*	+ 2 fold & sig. in E2	E2 vs DMSO	1.27802542349692	0.0489551993451486	Promoter	0	ENSG00000171793	CTPS1	CTP synthase 1
chr1	41241345	41242083	*	+ 2 fold & sig. in E2	E2 vs DMSO	7.75890298825315	0.00326776419988417	Promoter	0	NA	LOC102723924	uncharacterized LOC102723924
chr1	41415172	41415959	*	+ 2 fold & sig. in E2	E2 vs DMSO	3.2205404662035	1.5288416744255e-05	Distal Intergenic	-39503	ENSG00000229901	FOXO6-AS1	FOXO6 antisense RNA 1
chr1	41423373	41424274	*	+ 2 fold & sig. in E2	E2 vs DMSO	1.99735342662277	0.00157296518726072	Distal Intergenic	-47704	ENSG00000229901	FOXO6-AS1	FOXO6 antisense RNA 1
chr1	41496332	41496663	*	+ 2 fold & sig. in E2	E2 vs DMSO	9.12722055593566	1.64629527222882e-07	Distal Intergenic	-11649	ENSG00000127129	EDN2	endothelin 2
chr1	41498310	41499205	*	+ 2 fold & sig. in E2	E2 vs DMSO	1.85047982185342	6.27535385828933e-07	Distal Intergenic	-13627	ENSG00000127129	EDN2	endothelin 2
chr1	41500451	41501343	*	+ 2 fold & sig. in E2	E2 vs DMSO	1.90814567197925	4.72050227769842e-08	Distal Intergenic	-15768	ENSG00000127129	EDN2	endothelin 2
chr1	41719406	41719959	*	+ 2 fold & sig. in E2	E2 vs DMSO	2.72210427554792	0.00917210061134879	Intron (ENST00000372584.5/59269, intron 1 of 7)	-57081	ENSG00000127124	HIVEP3	HIVEP zinc finger 3
chr1	41764527	41765269	*	+ 2 fold & sig. in E2	E2 vs DMSO	4.44927362462251	2.09770245993216e-05	Intron (ENST00000372584.5/59269, intron 1 of 7)	-102202	ENSG00000127124	HIVEP3	HIVEP zinc finger 3
chr1	41778182	41779026	*	+ 2 fold & sig. in E2	E2 vs DMSO	4.11532950487554	3.23482682524415e-13	Intron (ENST00000372584.5/59269, intron 1 of 7)	90604	ENSG00000127124	HIVEP3	HIVEP zinc finger 3
chr1	41795132	41795583	*	+ 2 fold & sig. in E2	E2 vs DMSO	2.46696952696382	0.0199433507687437	Intron (ENST00000372584.5/59269, intron 1 of 7)	74047	ENSG00000127124	HIVEP3	HIVEP zinc finger 3
chr1	41823040	41823832	*	+ 2 fold & sig. in E2	E2 vs DMSO	2.60242920625732	0.000317187863021725	Intron (ENST00000372584.5/59269, intron 1 of 7)	45798	ENSG00000127124	HIVEP3	HIVEP zinc finger 3
chr1	41860214	41860576	*	+ 2 fold & sig. in E2	E2 vs DMSO	2.83972946446459	9.17917299366882e-07	Intron (ENST00000372584.5/59269, intron 1 of 7)	9054	ENSG00000127124	HIVEP3	HIVEP zinc finger 3
chr1	41862303	41863326	*	+ 2 fold & sig. in E2	E2 vs DMSO	2.88279619886763	1.70221347713439e-11	Intron (ENST00000372584.5/59269, intron 1 of 7)	6304	ENSG00000127124	HIVEP3	HIVEP zinc finger 3
chr1	41866139	41866722	*	+ 2 fold & sig. in E2	E2 vs DMSO	3.19317754836995	7.53049518786817e-12	Intron (ENST00000372584.5/59269, intron 1 of 7)	2908	ENSG00000127124	HIVEP3	HIVEP zinc finger 3
chr1	41868082	41868726	*	+ 2 fold & sig. in E2	E2 vs DMSO	3.67903715225029	1.15806096659125e-12	Intron (ENST00000372584.5/59269, intron 1 of 7)	904	ENSG00000127124	HIVEP3	HIVEP zinc finger 3
chr1	41954406	41955070	*	+ 2 fold & sig. in E2	E2 vs DMSO	1.66589583489201	0.00331263159729833	Intron (ENST00000489103.5/59269, intron 1 of 3)	-35484	ENSG00000127124	HIVEP3	HIVEP zinc finger 3
chr1	42151992	42152849	*	+ 2 fold & sig. in E2	E2 vs DMSO	2.72684764076946	1.82103237583216e-10	Promoter	-561	ENSG00000044012	GUCA2B	guanylate cyclase activator 2B
chr1	42958577	42959580	*	+ 2 fold & sig. in E2	E2 vs DMSO	1.01346229431487	0.0113048174976173	Promoter	0	ENSG00000227533	SLC2A1-DT	SLC2A1 divergent transcript
chr1	42973230	42973760	*	+ 2 fold & sig. in E2	E2 vs DMSO	2.78425439686226	4.87316352076548e-05	Intron (ENST00000431759.6/440584, intron 2 of 3)	14130	ENSG00000227533	SLC2A1-DT	SLC2A1 divergent transcript
chr1	42993430	42993961	*	+ 2 fold & sig. in E2	E2 vs DMSO	3.15330895218392	4.95764886181252e-09	Intron (ENST00000653200.1/440584, intron 3 of 3)	34330	ENSG00000227533	SLC2A1-DT	SLC2A1 divergent transcript
chr1	43639830	43640557	*	+ 2 fold & sig. in E2	E2 vs DMSO	2.8719381400702	0.002226240831005	Distal Intergenic	-9592	ENSG00000066135	KDM4A	lysine demethylase 4A
chr1	43946206	43947228	*	+ 2 fold & sig. in E2	E2 vs DMSO	1.16267226902525	0.0185632859625314	Promoter	0	NA	LOC101929609	uncharacterized LOC101929609
chr1	44043666	44044449	*	+ 2 fold & sig. in E2	E2 vs DMSO	1.75174655288873	0.0465476241468213	Promoter	0	ENSG00000171872	KLF17	Kruppel like factor 17
chr1	44067284	44068408	*	+ 2 fold & sig. in E2	E2 vs DMSO	3.79667170506106	9.56529006934126e-12	Intron (ENST00000434244.5/128209, intron 5 of 6)	16091	ENSG00000171872	KLF17	Kruppel like factor 17
chr1	44799673	44800454	*	+ 2 fold & sig. in E2	E2 vs DMSO	1.21678861992081	0.00118081953143992	Promoter	0	ENSG00000173846	PLK3	polo like kinase 3
chr1	44819084	44820762	*	+ 2 fold & sig. in E2	E2 vs DMSO	1.69911586620372	2.27916161291239e-05	3' UTR	2498	ENSG00000117425	PTCH2	patched 2
chr1	45059815	45060499	*	+ 2 fold & sig. in E2	E2 vs DMSO	2.60950171834194	0.000229162645759461	Exon (ENST00000359600.6/57643, exon 3 of 14)	45268	ENSG00000126088	UROD	uroporphyrinogen decarboxylase
chr1	45303547	45305131	*	+ 2 fold & sig. in E2	E2 vs DMSO	1.18389345530473	0.000243802731538431	Promoter	0	ENSG00000281912	LINC01144	long intergenic non-protein coding RNA 1144
chr1	45590222	45591025	*	+ 2 fold & sig. in E2	E2 vs DMSO	2.09261052325724	0.0142391350254964	Intron (ENST00000437901.6/4678, intron 2 of 9)	6157	ENSG00000132780	NASP	nuclear autoantigenic sperm protein
chr1	46478099	46479337	*	+ 2 fold & sig. in E2	E2 vs DMSO	2.88061448154535	8.49119872688659e-07	Intron (ENST00000635606.3/729041, intron 1 of 1)	-10499	ENSG00000197587	DMBX1	diencephalon/mesencephalon homeobox 1
chr1	4733523	4734169	*	+ 2 fold & sig. in E2	E2 vs DMSO	2.91705596730176	0.0336676606399919	Exon (ENST00000658045.1/ENST00000658045.1, exon 1 of 2)	22368	ENSG00000196581	AJAP1	adherens junctions associated protein 1
chr1	47782132	47782640	*	+ 2 fold & sig. in E2	E2 vs DMSO	2.55672328105759	0.0141743046707003	Intron (ENST00000606738.3/388630, intron 4 of 6)	-16585	ENSG00000269113	TRABD2B	TraB domain containing 2B
chr1	47888985	47889838	*	+ 2 fold & sig. in E2	E2 vs DMSO	3.67951222565184	1.33505663792495e-05	Intron (ENST00000606738.3/388630, intron 2 of 6)	104374	ENSG00000269113	TRABD2B	TraB domain containing 2B
chr1	47894500	47895620	*	+ 2 fold & sig. in E2	E2 vs DMSO	2.11825127449067	6.31095624171299e-07	Intron (ENST00000606738.3/388630, intron 2 of 6)	98592	ENSG00000269113	TRABD2B	TraB domain containing 2B
chr1	47920924	47921460	*	+ 2 fold & sig. in E2	E2 vs DMSO	7.33017210923394	0.00246197847069982	Intron (ENST00000606738.3/388630, intron 2 of 6)	72752	ENSG00000269113	TRABD2B	TraB domain containing 2B
chr1	48681465	48681864	*	+ 2 fold & sig. in E2	E2 vs DMSO	6.19799086369116	0.0435721479274108	Intron (ENST00000371839.6/84871, intron 6 of 13)	77069	ENSG00000162373	BEND5	BEN domain containing 5
chr1	51297335	51298124	*	+ 2 fold & sig. in E2	E2 vs DMSO	1.63844740335838	0.0230000169768159	Promoter	0	ENSG00000085831	TTC39A	tetratricopeptide repeat domain 39A
chr1	51306760	51307546	*	+ 2 fold & sig. in E2	E2 vs DMSO	3.66018471488684	9.27025322633984e-11	Intron (ENST00000447632.6/22996, intron 6 of 17)	-1167	ENSG00000085831	TTC39A	tetratricopeptide repeat domain 39A
chr1	51313795	51314996	*	+ 2 fold & sig. in E2	E2 vs DMSO	1.49948054838255	0.00107883762324575	Intron (ENST00000447632.6/22996, intron 2 of 17)	7214	ENSG00000085831	TTC39A	tetratricopeptide repeat domain 39A
chr1	51321243	51322093	*	+ 2 fold & sig. in E2	E2 vs DMSO	4.2721525534364	7.56140059190413e-15	Promoter	117	ENSG00000085831	TTC39A	tetratricopeptide repeat domain 39A
chr1	51329011	51330336	*	+ 2 fold & sig. in E2	E2 vs DMSO	2.13313845556992	9.52348339224364e-10	Promoter	0	ENSG00000261664	TTC39A-AS1	TTC39A antisense RNA 1
chr1	51331212	51331598	*	+ 2 fold & sig. in E2	E2 vs DMSO	1.92712427018731	0.000264583765752494	Promoter	0	ENSG00000085831	TTC39A	tetratricopeptide repeat domain 39A
chr1	51541571	51542502	*	+ 2 fold & sig. in E2	E2 vs DMSO	3.51821786777905	7.43689036073452e-12	Intron (ENST00000702775.1/105378720, intron 1 of 2)	-22243	ENSG00000085832	EPS15	epidermal growth factor receptor pathway substrate 15
chr1	51558194	51559072	*	+ 2 fold & sig. in E2	E2 vs DMSO	1.5181423720783	0.000786932849692383	Intron (ENST00000702775.1/105378720, intron 1 of 2)	-18107	ENSG00000117859	OSBPL9	oxysterol binding protein like 9
chr1	51976748	51977726	*	+ 2 fold & sig. in E2	E2 vs DMSO	1.38654509234127	0.00122441812466862	Exon (ENST00000371655.4/5865, exon 2 of 5)	12974	ENSG00000169213	RAB3B	RAB3B, member RAS oncogene family
chr1	5312722	5313404	*	+ 2 fold & sig. in E2	E2 vs DMSO	9.15318681545292	6.18181535655833e-08	Distal Intergenic	179400	ENSG00000284692	LOC105376686	uncharacterized LOC105376686
chr1	53942421	53942835	*	+ 2 fold & sig. in E2	E2 vs DMSO	1.77097337552954	0.0232675965258196	Intron (ENST00000371378.6/51668, intron 1 of 5)	-2321	ENSG00000081870	HSPB11	heat shock protein family B (small) member 11
chr1	59029333	59030346	*	+ 2 fold & sig. in E2	E2 vs DMSO	1.11741206619396	0.03567120400707	Intron (ENST00000634502.1/101926925, intron 6 of 13)	8734	NA	LINC01358	long intergenic non-protein coding RNA 1358
chr1	5959285	5960347	*	+ 2 fold & sig. in E2	E2 vs DMSO	1.8258787987869	0.0480799583033997	Intron (ENST00000478423.6/261734, intron 4 of 25)	-30580	ENSG00000069424	KCNAB2	potassium voltage-gated channel subfamily A regulatory beta subunit 2
chr1	59814386	59815593	*	+ 2 fold & sig. in E2	E2 vs DMSO	1.03061694983088	0.0247046646723023	Promoter	0	ENSG00000134709	HOOK1	hook microtubule tethering protein 1
chr1	6098052	6098502	*	+ 2 fold & sig. in E2	E2 vs DMSO	2.70533021522072	0.0010541542938629	3' UTR	3569	ENSG00000069424	KCNAB2	potassium voltage-gated channel subfamily A regulatory beta subunit 2
chr1	6100900	6101498	*	+ 2 fold & sig. in E2	E2 vs DMSO	2.89920992600442	2.09770245993216e-05	3' UTR	5274	ENSG00000116254	CHD5	chromodomain helicase DNA binding protein 5
chr1	6103490	6103851	*	+ 2 fold & sig. in E2	E2 vs DMSO	2.19808149936132	0.0477976669807966	3' UTR	2921	ENSG00000116254	CHD5	chromodomain helicase DNA binding protein 5
chr1	61215672	61216407	*	+ 2 fold & sig. in E2	E2 vs DMSO	1.95621551993233	7.24768492741298e-05	Intron (ENST00000371191.5/4774, intron 2 of 10)	12149	ENSG00000162599	NFIA	nuclear factor I A
chr1	61496264	61497099	*	+ 2 fold & sig. in E2	E2 vs DMSO	1.91370740862571	0.000271144834156186	Intron (ENST00000647399.1/ENST00000647399.1, intron 1 of 2)	89592	ENSG00000162599	NFIA	nuclear factor I A
chr1	61641875	61642151	*	+ 2 fold & sig. in E2	E2 vs DMSO	2.80089249321534	0.0380212848783851	Distal Intergenic	-12043	NA	MGC34796	sepiapterin reductase (7,8-dihydrobiopterin:NADP+ oxidoreductase) pseudogene
chr1	61741988	61743260	*	+ 2 fold & sig. in E2	E2 vs DMSO	2.77987222980355	1.78587425940589e-07	Promoter	0	ENSG00000132849	PATJ	PATJ crumbs cell polarity complex component
chr1	6234580	6236200	*	+ 2 fold & sig. in E2	E2 vs DMSO	1.52843947468583	0.000197516042585842	Promoter	0	NA	ICMT-DT	ICMT divergent transcript
chr1	6259325	6260279	*	+ 2 fold & sig. in E2	E2 vs DMSO	1.98037368366243	2.12754809472521e-06	Intron (ENST00000377893.3/387509, intron 1 of 5)	819	ENSG00000158292	GPR153	G protein-coupled receptor 153
chr1	64187538	64188062	*	+ 2 fold & sig. in E2	E2 vs DMSO	3.16447388230255	0.0167044878926455	Intron (ENST00000646967.1/ENST00000646967.1, intron 1 of 1)	-15561	ENSG00000177414	UBE2U	ubiquitin conjugating enzyme E2 U
chr1	64346349	64346646	*	+ 2 fold & sig. in E2	E2 vs DMSO	7.77568888923824	0.00085468193197284	Distal Intergenic	37813	NA	NA	NA
chr1	64436016	64436715	*	+ 2 fold & sig. in E2	E2 vs DMSO	3.05574033636288	0.000115193944450279	Distal Intergenic	-33414	ENSG00000158966	CACHD1	cache domain containing 1
chr1	64542106	64542485	*	+ 2 fold & sig. in E2	E2 vs DMSO	6.28840320138496	0.0348192276422059	Intron (ENST00000651257.2/57685, intron 1 of 26)	-21192	ENSG00000158966	CACHD1	cache domain containing 1
chr1	64686907	64687656	*	+ 2 fold & sig. in E2	E2 vs DMSO	1.9242702065004	0.0202051444382012	Intron (ENST00000651257.2/57685, intron 26 of 26)	22707	ENSG00000158966	CACHD1	cache domain containing 1
chr1	64692862	64693689	*	+ 2 fold & sig. in E2	E2 vs DMSO	3.72576860583717	8.74773209045612e-06	3' UTR	28662	ENSG00000158966	CACHD1	cache domain containing 1
chr1	64861425	64862205	*	+ 2 fold & sig. in E2	E2 vs DMSO	3.07332015023099	7.55617650579124e-05	Intron (ENST00000342505.5/3716, intron 8 of 24)	2651	ENSG00000162434	JAK1	Janus kinase 1
chr1	64878885	64879588	*	+ 2 fold & sig. in E2	E2 vs DMSO	4.04646607133449	7.74006327706569e-12	3' UTR	-9477	ENSG00000162434	JAK1	Janus kinase 1
chr1	64893276	64893565	*	+ 2 fold & sig. in E2	E2 vs DMSO	4.16244867580003	0.000114496920642251	Intron (ENST00000342505.5/3716, intron 1 of 24)	-23868	ENSG00000162434	JAK1	Janus kinase 1
chr1	64915549	64916303	*	+ 2 fold & sig. in E2	E2 vs DMSO	2.25413733979519	1.44525400999073e-07	Intron (ENST00000342505.5/3716, intron 1 of 24)	-46141	ENSG00000162434	JAK1	Janus kinase 1
chr1	64965401	64966962	*	+ 2 fold & sig. in E2	E2 vs DMSO	2.33927395848393	6.92494678956892e-05	Promoter	0	ENSG00000162434	JAK1	Janus kinase 1
chr1	64980044	64980278	*	+ 2 fold & sig. in E2	E2 vs DMSO	2.37708664570483	0.00028173656739368	Intron (ENST00000671954.2/3716, intron 2 of 25)	9784	ENSG00000226891	LINC01359	long intergenic non-protein coding RNA 1359
chr1	64987392	64987663	*	+ 2 fold & sig. in E2	E2 vs DMSO	2.92278217141862	2.82857114192372e-05	Exon (ENST00000654707.1/101927084, exon 3 of 5)	2399	ENSG00000226891	LINC01359	long intergenic non-protein coding RNA 1359
chr1	64989433	64990028	*	+ 2 fold & sig. in E2	E2 vs DMSO	3.01762596185201	1.45574294675811e-06	Promoter	34	ENSG00000226891	LINC01359	long intergenic non-protein coding RNA 1359
chr1	64996737	64997295	*	+ 2 fold & sig. in E2	E2 vs DMSO	2.98048938689083	1.2603654993245e-06	Intron (ENST00000671954.2/3716, intron 2 of 25)	-3725	ENSG00000226891	LINC01359	long intergenic non-protein coding RNA 1359
chr1	64999934	65000379	*	+ 2 fold & sig. in E2	E2 vs DMSO	4.14071692588104	0.000159093727010856	Intron (ENST00000671954.2/3716, intron 2 of 25)	2052	ENSG00000226891	LINC01359	long intergenic non-protein coding RNA 1359
chr1	65002290	65003255	*	+ 2 fold & sig. in E2	E2 vs DMSO	2.57071965779328	5.69379284484881e-07	Promoter	0	ENSG00000226891	LINC01359	long intergenic non-protein coding RNA 1359
chr1	65036909	65037257	*	+ 2 fold & sig. in E2	E2 vs DMSO	8.00590749133896	0.000155915444317873	Intron (ENST00000671954.2/3716, intron 2 of 25)	20585	ENSG00000265996	MIR3671	microRNA 3671
chr1	65066514	65067330	*	+ 2 fold & sig. in E2	E2 vs DMSO	2.42188892657965	0.00158142112751896	Promoter	284	ENSG00000162434	JAK1	Janus kinase 1
chr1	6611568	6612108	*	+ 2 fold & sig. in E2	E2 vs DMSO	2.05292430515308	0.00237280488405657	Intron (ENST00000467612.5/9903, intron 1 of 3)	-1623	ENSG00000116273	PHF13	PHD finger protein 13
chr1	66924798	66925742	*	+ 2 fold & sig. in E2	E2 vs DMSO	1.61333917789748	0.000422971200414596	Promoter	0	ENSG00000198160	MIER1	MIER1 transcriptional regulator
chr1	6909625	6910348	*	+ 2 fold & sig. in E2	E2 vs DMSO	2.98904864062755	0.00142982288580635	Intron (ENST00000303635.12/23261, intron 3 of 22)	35569	ENSG00000171735	CAMTA1	calmodulin binding transcription activator 1
chr1	6960197	6960897	*	+ 2 fold & sig. in E2	E2 vs DMSO	2.95128444914419	3.99865434741969e-12	Intron (ENST00000303635.12/23261, intron 3 of 22)	86141	ENSG00000171735	CAMTA1	calmodulin binding transcription activator 1
chr1	6998034	6998639	*	+ 2 fold & sig. in E2	E2 vs DMSO	2.12978488193807	0.0488450532644399	Intron (ENST00000303635.12/23261, intron 3 of 22)	123978	ENSG00000171735	CAMTA1	calmodulin binding transcription activator 1
chr1	7106748	7107194	*	+ 2 fold & sig. in E2	E2 vs DMSO	2.98606848620832	0.00153697870926637	Intron (ENST00000303635.12/23261, intron 4 of 22)	232692	ENSG00000171735	CAMTA1	calmodulin binding transcription activator 1
chr1	7109971	7110914	*	+ 2 fold & sig. in E2	E2 vs DMSO	4.90994068596905	6.3411159502907e-10	Intron (ENST00000303635.12/23261, intron 4 of 22)	235915	ENSG00000171735	CAMTA1	calmodulin binding transcription activator 1
chr1	71448514	71449199	*	+ 2 fold & sig. in E2	E2 vs DMSO	3.14280925587871	0.000682241355022629	Intron (ENST00000654734.1/100852410, intron 5 of 6)	-8676	ENSG00000172260	NEGR1	neuronal growth regulator 1
chr1	7223529	7224540	*	+ 2 fold & sig. in E2	E2 vs DMSO	4.69681323815012	8.52288804567534e-16	Intron (ENST00000303635.12/23261, intron 4 of 22)	-144402	ENSG00000171735	CAMTA1	calmodulin binding transcription activator 1
chr1	7228691	7229296	*	+ 2 fold & sig. in E2	E2 vs DMSO	2.9846680657786	7.15590241345233e-08	Intron (ENST00000303635.12/23261, intron 4 of 22)	-139646	ENSG00000171735	CAMTA1	calmodulin binding transcription activator 1
chr1	7265633	7266457	*	+ 2 fold & sig. in E2	E2 vs DMSO	1.34225306353957	0.000750328883537682	Intron (ENST00000303635.12/23261, intron 5 of 22)	-102485	ENSG00000171735	CAMTA1	calmodulin binding transcription activator 1
chr1	7282768	7283254	*	+ 2 fold & sig. in E2	E2 vs DMSO	7.40781826935177	0.00184792669090363	Intron (ENST00000303635.12/23261, intron 5 of 22)	-85688	ENSG00000171735	CAMTA1	calmodulin binding transcription activator 1
chr1	7286954	7287542	*	+ 2 fold & sig. in E2	E2 vs DMSO	1.58233096288126	0.0447804976730979	Intron (ENST00000303635.12/23261, intron 5 of 22)	-81400	ENSG00000171735	CAMTA1	calmodulin binding transcription activator 1
chr1	7326063	7327011	*	+ 2 fold & sig. in E2	E2 vs DMSO	2.35918715876001	1.22218731031923e-07	Intron (ENST00000303635.12/23261, intron 5 of 22)	-41931	ENSG00000171735	CAMTA1	calmodulin binding transcription activator 1
chr1	7335188	7336206	*	+ 2 fold & sig. in E2	E2 vs DMSO	2.14255877917553	6.2692494434157e-08	Intron (ENST00000303635.12/23261, intron 5 of 22)	-32736	ENSG00000171735	CAMTA1	calmodulin binding transcription activator 1
chr1	7341079	7341981	*	+ 2 fold & sig. in E2	E2 vs DMSO	1.8960837935435	0.0032763915638599	Intron (ENST00000303635.12/23261, intron 5 of 22)	-26961	ENSG00000171735	CAMTA1	calmodulin binding transcription activator 1
chr1	7401730	7402450	*	+ 2 fold & sig. in E2	E2 vs DMSO	2.18710519683453	1.55674878891367e-07	Intron (ENST00000303635.12/23261, intron 5 of 22)	-11976	ENSG00000237728	CAMTA1-AS2	CAMTA1 antisense RNA 2
chr1	7440147	7440923	*	+ 2 fold & sig. in E2	E2 vs DMSO	2.61850849348135	9.78315383551279e-06	Intron (ENST00000303635.12/23261, intron 5 of 22)	631	NA	CAMTA1-AS1	CAMTA1 antisense RNA 1
chr1	74485069	74485883	*	+ 2 fold & sig. in E2	E2 vs DMSO	2.01363268139144	0.00034074506747226	Intron (ENST00000557284.7/100526835, intron 23 of 26)	26728	ENSG00000162621	LRRC53	leucine rich repeat containing 53
chr1	7454288	7454522	*	+ 2 fold & sig. in E2	E2 vs DMSO	7.45626771558209	0.00182136178260949	Intron (ENST00000303635.12/23261, intron 5 of 22)	-12734	NA	CAMTA1-AS1	CAMTA1 antisense RNA 1
chr1	74652330	74653276	*	+ 2 fold & sig. in E2	E2 vs DMSO	3.87009171441304	5.834428217193e-15	Intron (ENST00000326665.10/127254, intron 1 of 14)	-17475	ENSG00000178965	ERICH3	glutamate rich 3
chr1	7470892	7471760	*	+ 2 fold & sig. in E2	E2 vs DMSO	2.50770497285742	1.36069683776192e-07	Intron (ENST00000303635.12/23261, intron 6 of 22)	-29338	NA	CAMTA1-AS1	CAMTA1 antisense RNA 1
chr1	7510340	7511143	*	+ 2 fold & sig. in E2	E2 vs DMSO	3.05914961947205	0.00133667449798187	Intron (ENST00000303635.12/23261, intron 6 of 22)	-68786	NA	CAMTA1-AS1	CAMTA1 antisense RNA 1
chr1	7526571	7527394	*	+ 2 fold & sig. in E2	E2 vs DMSO	2.87508490803572	0.000220303099354293	Intron (ENST00000303635.12/23261, intron 6 of 22)	-85017	NA	CAMTA1-AS1	CAMTA1 antisense RNA 1
chr1	7529003	7529527	*	+ 2 fold & sig. in E2	E2 vs DMSO	3.55490351244133	8.09867452579435e-05	Intron (ENST00000303635.12/23261, intron 6 of 22)	-87449	NA	CAMTA1-AS1	CAMTA1 antisense RNA 1
chr1	7538103	7538450	*	+ 2 fold & sig. in E2	E2 vs DMSO	2.38096356254119	0.0010314938415129	Intron (ENST00000303635.12/23261, intron 6 of 22)	-96549	NA	CAMTA1-AS1	CAMTA1 antisense RNA 1
chr1	7539561	7540208	*	+ 2 fold & sig. in E2	E2 vs DMSO	1.60811828039277	0.000253514894451235	Intron (ENST00000303635.12/23261, intron 6 of 22)	-98007	NA	CAMTA1-AS1	CAMTA1 antisense RNA 1
chr1	7540740	7541312	*	+ 2 fold & sig. in E2	E2 vs DMSO	2.72509514013881	6.45113339464027e-06	Intron (ENST00000303635.12/23261, intron 6 of 22)	-99186	NA	CAMTA1-AS1	CAMTA1 antisense RNA 1
chr1	7783586	7784752	*	+ 2 fold & sig. in E2	E2 vs DMSO	1.27499521813396	0.00564264161165049	Promoter	0	ENSG00000049246	PER3	period circadian regulator 3
chr1	79361073	79361716	*	+ 2 fold & sig. in E2	E2 vs DMSO	2.53949531254717	0.0123864541059182	Distal Intergenic	36065	NA	LINC02792	long intergenic non-protein coding RNA 2792
chr1	79391854	79392988	*	+ 2 fold & sig. in E2	E2 vs DMSO	2.3627913125055	0.000155474083474143	Distal Intergenic	66846	NA	LINC02792	long intergenic non-protein coding RNA 2792
chr1	7953800	7954600	*	+ 2 fold & sig. in E2	E2 vs DMSO	2.69074591048908	1.59289335405622e-08	Promoter	0	ENSG00000116288	PARK7	Parkinsonism associated deglycase
chr1	8120573	8121752	*	+ 2 fold & sig. in E2	E2 vs DMSO	1.4248133314646	0.00942645238335631	Exon (ENST00000445300.1/121832806, exon 3 of 3)	-79766	ENSG00000227634	LINC01714	long intergenic non-protein coding RNA 1714
chr1	8194285	8195046	*	+ 2 fold & sig. in E2	E2 vs DMSO	1.85887363117489	1.57138904600474e-05	Exon (ENST00000684850.1/ENST00000684850.1, exon 2 of 2)	-6472	ENSG00000227634	LINC01714	long intergenic non-protein coding RNA 1714
chr1	8202232	8203455	*	+ 2 fold & sig. in E2	E2 vs DMSO	3.47462257227023	1.31825786758737e-13	Promoter	0	ENSG00000227634	LINC01714	long intergenic non-protein coding RNA 1714
chr1	82386500	82387269	*	+ 2 fold & sig. in E2	E2 vs DMSO	1.91227730133246	0.00125544156894894	Intron (ENST00000653483.1/ENST00000653483.1, intron 4 of 4)	168282	NA	NA	NA
chr1	82864540	82864983	*	+ 2 fold & sig. in E2	E2 vs DMSO	3.29279565325614	0.0116875819031865	Distal Intergenic	-38200	ENSG00000230817	LINC01362	long intergenic non-protein coding RNA 1362
chr1	83163969	83164529	*	+ 2 fold & sig. in E2	E2 vs DMSO	2.09672160160429	3.98452404847636e-05	Intron (ENST00000452901.5/103283057, intron 10 of 10)	-177761	ENSG00000236268	LINC01361	long intergenic non-protein coding RNA 1361
chr1	8318064	8318705	*	+ 2 fold & sig. in E2	E2 vs DMSO	8.98447386468916	8.32118808245753e-07	Promoter	0	ENSG00000162426	SLC45A1	solute carrier family 45 member 1
chr1	84873800	84874583	*	+ 2 fold & sig. in E2	E2 vs DMSO	3.04189075757258	0.0173313881219035	Intron (ENST00000370611.4/23566, intron 1 of 2)	-7641	ENSG00000171517	LPAR3	lysophosphatidic acid receptor 3
chr1	85276274	85277029	*	+ 2 fold & sig. in E2	E2 vs DMSO	1.28942755262467	0.00106860832757381	Promoter	0	NA	BCL10-AS1	BCL10 antisense RNA 1
chr1	85278635	85279395	*	+ 2 fold & sig. in E2	E2 vs DMSO	2.45576392724149	1.88055405568614e-07	Intron (ENST00000654182.1/646626, intron 2 of 2)	1920	NA	BCL10-AS1	BCL10 antisense RNA 1
chr1	85297589	85298688	*	+ 2 fold & sig. in E2	E2 vs DMSO	1.68572533804384	8.70975925634653e-06	Intron (ENST00000654182.1/646626, intron 2 of 2)	20874	NA	BCL10-AS1	BCL10 antisense RNA 1
chr1	85464094	85465628	*	+ 2 fold & sig. in E2	E2 vs DMSO	2.13353614474624	0.00727649274064381	Promoter	0	ENSG00000153904	DDAH1	dimethylarginine dimethylaminohydrolase 1
chr1	85503949	85504822	*	+ 2 fold & sig. in E2	E2 vs DMSO	3.97559048025602	1.26013610339072e-12	Intron (ENST00000426972.8/23576, intron 1 of 6)	-7668	ENSG00000153904	DDAH1	dimethylarginine dimethylaminohydrolase 1
chr1	85526191	85526666	*	+ 2 fold & sig. in E2	E2 vs DMSO	6.86621216729446	0.0103716641273407	Intron (ENST00000426972.8/23576, intron 1 of 6)	-29910	ENSG00000153904	DDAH1	dimethylarginine dimethylaminohydrolase 1
chr1	85544518	85545366	*	+ 2 fold & sig. in E2	E2 vs DMSO	1.54123511154677	0.0235232743333453	Intron (ENST00000426972.8/23576, intron 1 of 6)	31492	NA	NA	NA
chr1	85576442	85577079	*	+ 2 fold & sig. in E2	E2 vs DMSO	3.55445814922993	0.000178411441519883	Promoter	0	NA	NA	NA
chr1	85599000	85599604	*	+ 2 fold & sig. in E2	E2 vs DMSO	2.68764010672243	4.36734345259885e-05	Exon (ENST00000426794.1/ENST00000426794.1, exon 1 of 2)	6720	NA	NA	NA
chr1	85606909	85607705	*	+ 2 fold & sig. in E2	E2 vs DMSO	2.82843592773092	3.20069495536957e-05	Distal Intergenic	14629	NA	NA	NA
chr1	85661703	85662164	*	+ 2 fold & sig. in E2	E2 vs DMSO	6.38783947764632	0.0457421532030422	Intron (ENST00000370574.4/54680, intron 8 of 9)	46269	ENSG00000117174	ZNHIT6	zinc finger HIT-type containing 6
chr1	8878516	8879673	*	+ 2 fold & sig. in E2	E2 vs DMSO	1.26919136386595	0.0259856933885362	Promoter	0	ENSG00000230679	ENO1-AS1	ENO1 antisense RNA 1
chr1	89524284	89525519	*	+ 2 fold & sig. in E2	E2 vs DMSO	3.19695101958981	4.19943259565621e-06	Promoter	0	NA	LOC105378844	uncharacterized LOC105378844
chr1	8989594	8990375	*	+ 2 fold & sig. in E2	E2 vs DMSO	2.34048827551454	0.000942761233299089	Distal Intergenic	36048	ENSG00000197241	SLC2A7	solute carrier family 2 member 7
chr1	89942720	89943687	*	+ 2 fold & sig. in E2	E2 vs DMSO	1.54003640370584	0.0126255425559626	Distal Intergenic	50634	NA	GEMIN8P4	gem nuclear organelle associated protein 8 pseudogene 4
chr1	9038178	9039020	*	+ 2 fold & sig. in E2	E2 vs DMSO	2.14121380960327	0.000567901075548281	Exon (ENST00000377424.9/6518, exon 9 of 12)	875	ENSG00000142583	SLC2A5	solute carrier family 2 member 5
chr1	90851004	90851665	*	+ 2 fold & sig. in E2	E2 vs DMSO	7.59518579186282	0.00123785922687164	Promoter	0	ENSG00000233593	LINC02609	long intergenic non-protein coding RNA 2609
chr1	91099821	91100538	*	+ 2 fold & sig. in E2	E2 vs DMSO	2.42839142787984	0.00633345572090731	Distal Intergenic	-77549	ENSG00000122482	ZNF644	zinc finger protein 644
chr1	91958907	91959673	*	+ 2 fold & sig. in E2	E2 vs DMSO	3.09094039451392	0.00952140217540913	Intron (ENST00000448194.6/676, intron 2 of 6)	6547	ENSG00000137948	BRDT	bromodomain testis associated
chr1	9302972	9303481	*	+ 2 fold & sig. in E2	E2 vs DMSO	1.86974060627076	0.00201398858987017	Intron (ENST00000328089.11/80176, intron 1 of 2)	8444	ENSG00000171621	SPSB1	splA/ryanodine receptor domain and SOCS box containing 1
chr1	9325436	9326373	*	+ 2 fold & sig. in E2	E2 vs DMSO	2.16779205353194	0.00123076450981283	Intron (ENST00000328089.11/80176, intron 1 of 2)	-25058	ENSG00000171621	SPSB1	splA/ryanodine receptor domain and SOCS box containing 1
chr1	93584996	93585731	*	+ 2 fold & sig. in E2	E2 vs DMSO	1.40440831380122	0.0373771708315622	Promoter	0	ENSG00000137936	BCAR3	BCAR3 adaptor protein, NSP family member
chr1	93599103	93599878	*	+ 2 fold & sig. in E2	E2 vs DMSO	2.22673772809797	0.000660089232025037	Exon (ENST00000446684.1/100129046, exon 3 of 3)	4713	NA	BCAR3-AS1	BCAR3 antisense RNA 1
chr1	93779507	93780232	*	+ 2 fold & sig. in E2	E2 vs DMSO	1.92960061009924	0.0244119815651127	Intron (ENST00000370244.5/8412, intron 2 of 13)	-4063	ENSG00000137936	BCAR3	BCAR3 adaptor protein, NSP family member
chr1	93908475	93909189	*	+ 2 fold & sig. in E2	E2 vs DMSO	3.81819611208301	0.000952253517893339	Promoter	0	ENSG00000023909	GCLM	glutamate-cysteine ligase modifier subunit
chr1	94417943	94419030	*	+ 2 fold & sig. in E2	E2 vs DMSO	2.28651835418316	0.0279591429299052	Promoter	0	ENSG00000117528	ABCD3	ATP binding cassette subfamily D member 3
chr1	94422986	94423387	*	+ 2 fold & sig. in E2	E2 vs DMSO	6.60465356180389	0.0179182571573469	Intron (ENST00000370214.9/5825, intron 1 of 22)	4155	ENSG00000117528	ABCD3	ATP binding cassette subfamily D member 3
chr1	9472963	9473498	*	+ 2 fold & sig. in E2	E2 vs DMSO	3.49549578871252	2.51990760629724e-05	Distal Intergenic	-32399	ENSG00000284693	LINC02606	long intergenic non-protein coding RNA 2606
chr1	9476611	9477334	*	+ 2 fold & sig. in E2	E2 vs DMSO	2.56418408215196	1.42737426026876e-05	Distal Intergenic	-36047	ENSG00000284693	LINC02606	long intergenic non-protein coding RNA 2606
chr1	95953591	95954431	*	+ 2 fold & sig. in E2	E2 vs DMSO	1.97023883361877	0.0325478642316909	Intron (ENST00000442558.5/102723661, intron 1 of 1)	15690	ENSG00000237435	LINC02790	long intergenic non-protein coding RNA 2790
chr1	96059564	96060294	*	+ 2 fold & sig. in E2	E2 vs DMSO	2.18323940478763	5.18440761728182e-06	Distal Intergenic	48868	ENSG00000237435	LINC02790	long intergenic non-protein coding RNA 2790
chr1	96060366	96061326	*	+ 2 fold & sig. in E2	E2 vs DMSO	1.92672428293996	1.2061038090856e-05	Distal Intergenic	49670	ENSG00000237435	LINC02790	long intergenic non-protein coding RNA 2790
chr1	96116750	96117424	*	+ 2 fold & sig. in E2	E2 vs DMSO	6.73915224003223	0.0136558671188156	Distal Intergenic	106054	ENSG00000237435	LINC02790	long intergenic non-protein coding RNA 2790
chr1	96840573	96841258	*	+ 2 fold & sig. in E2	E2 vs DMSO	1.87872338830849	0.00522288966649958	Distal Intergenic	29516	ENSG00000117569	PTBP2	polypyrimidine tract binding protein 2
chr1	96983177	96983765	*	+ 2 fold & sig. in E2	E2 vs DMSO	2.5709507505885	0.0109969398632168	Distal Intergenic	-112158	ENSG00000232878	DPYD-AS1	DPYD antisense RNA 1
chr1	9950279	9951179	*	+ 2 fold & sig. in E2	E2 vs DMSO	1.19637088665603	0.000482393681716748	Exon (ENST00000636827.2/113391335, exon 5 of 5)	6791	ENSG00000173614	NMNAT1	nicotinamide nucleotide adenylyltransferase 1
chr10	100006066	100006803	*	+ 2 fold & sig. in E2	E2 vs DMSO	3.32062209888029	5.70032210369949e-08	Intron (ENST00000324109.9/23268, intron 1 of 16)	3144	ENSG00000107554	DNMBP	dynamin binding protein
chr10	100008164	100008452	*	+ 2 fold & sig. in E2	E2 vs DMSO	7.37328606722815	0.00170317535923731	Intron (ENST00000324109.9/23268, intron 1 of 16)	1495	ENSG00000107554	DNMBP	dynamin binding protein
chr10	100035381	100036025	*	+ 2 fold & sig. in E2	E2 vs DMSO	3.70965518779993	2.1993119910147e-07	Distal Intergenic	-25434	ENSG00000107554	DNMBP	dynamin binding protein
chr10	100043181	100044114	*	+ 2 fold & sig. in E2	E2 vs DMSO	1.3623005333812	0.00540559044199584	Intron (ENST00000370418.8/1369, intron 8 of 8)	21280	ENSG00000120054	CPN1	carboxypeptidase N subunit 1
chr10	100709919	100710628	*	+ 2 fold & sig. in E2	E2 vs DMSO	2.21874912591254	0.0108074252203138	Distal Intergenic	-24768	ENSG00000075891	PAX2	paired box 2
chr10	100883138	100883782	*	+ 2 fold & sig. in E2	E2 vs DMSO	2.22527738478468	0.000416798131447753	Distal Intergenic	-29181	ENSG00000119906	SLF2	SMC5-SMC6 complex localization factor 2
chr10	100989452	100989917	*	+ 2 fold & sig. in E2	E2 vs DMSO	2.35947919791587	0.0302201500777286	Promoter	0	ENSG00000107815	TWNK	twinkle mtDNA helicase
chr10	101601490	101602125	*	+ 2 fold & sig. in E2	E2 vs DMSO	3.68302344925377	0.0016050862981617	Promoter	0	ENSG00000283558	MIR3158-2	microRNA 3158-2
chr10	101631778	101632309	*	+ 2 fold & sig. in E2	E2 vs DMSO	3.19593476760333	0.000434977537780916	Intron (ENST00000331272.9/6468, intron 5 of 8)	-4879	ENSG00000107829	FBXW4	F-box and WD repeat domain containing 4
chr10	101938384	101938916	*	+ 2 fold & sig. in E2	E2 vs DMSO	7.03208839684156	0.00636469377270106	Intron (ENST00000370033.9/79591, intron 23 of 25)	-48648	ENSG00000120029	ARMH3	armadillo like helical domain containing 3
chr10	102713725	102714996	*	+ 2 fold & sig. in E2	E2 vs DMSO	2.02210293469976	1.12473308814451e-09	Promoter	0	ENSG00000156398	SFXN2	sideroflexin 2
chr10	102813828	102814829	*	+ 2 fold & sig. in E2	E2 vs DMSO	1.7766457811643	0.00223195740285098	3' UTR	16874	ENSG00000148795	CYP17A1	cytochrome P450 family 17 subfamily A member 1
chr10	102818854	102819583	*	+ 2 fold & sig. in E2	E2 vs DMSO	1.37266668773388	0.0247289114518864	Intron (ENST00000647664.1/54838, intron 3 of 7)	12120	ENSG00000148795	CYP17A1	cytochrome P450 family 17 subfamily A member 1
chr10	103125756	103126267	*	+ 2 fold & sig. in E2	E2 vs DMSO	2.6957193005179	0.00585362669133546	Intron (ENST00000675164.1/22978, intron 4 of 19)	13925	ENSG00000076685	NT5C2	5'-nucleotidase, cytosolic II
chr10	103889981	103890781	*	+ 2 fold & sig. in E2	E2 vs DMSO	2.34754030535779	1.26915825615028e-09	Intron (ENST00000698239.1/79991, intron 9 of 11)	2943	ENSG00000107960	STN1	STN1 subunit of CST complex
chr10	103907987	103908728	*	+ 2 fold & sig. in E2	E2 vs DMSO	2.07113911804053	1.89977520836711e-05	Intron (ENST00000698239.1/79991, intron 4 of 11)	-7834	ENSG00000107960	STN1	STN1 subunit of CST complex
chr10	103917713	103918806	*	+ 2 fold & sig. in E2	E2 vs DMSO	2.03266432900892	3.54366312895312e-06	Promoter	0	ENSG00000107960	STN1	STN1 subunit of CST complex
chr10	103923365	103923922	*	+ 2 fold & sig. in E2	E2 vs DMSO	2.33728468713287	0.00156131287314776	Intron (ENST00000698239.1/79991, intron 2 of 11)	-5033	ENSG00000107960	STN1	STN1 subunit of CST complex
chr10	103931129	103932289	*	+ 2 fold & sig. in E2	E2 vs DMSO	4.52989052863099	5.11234998649964e-16	Intron (ENST00000698239.1/79991, intron 2 of 11)	-12797	ENSG00000107960	STN1	STN1 subunit of CST complex
chr10	103948277	103949082	*	+ 2 fold & sig. in E2	E2 vs DMSO	2.16526172406506	2.32784473722686e-05	Intron (ENST00000698239.1/79991, intron 2 of 11)	10755	NA	LOC102724351	uncharacterized LOC102724351
chr10	107796520	107797071	*	+ 2 fold & sig. in E2	E2 vs DMSO	3.46635523793406	0.00422388986132164	Intron (ENST00000630847.2/103695365, intron 5 of 5)	243628	ENSG00000229981	LINC01435	long intergenic non-protein coding RNA 1435
chr10	108445813	108446344	*	+ 2 fold & sig. in E2	E2 vs DMSO	1.99241412052052	0.0303377297250376	Distal Intergenic	-247964	ENSG00000229981	LINC01435	long intergenic non-protein coding RNA 1435
chr10	110774233	110775549	*	+ 2 fold & sig. in E2	E2 vs DMSO	1.76449194690082	0.000151325465695074	Intron (ENST00000369519.4/282996, intron 1 of 13)	-48039	ENSG00000203867	RBM20	RNA binding motif protein 20
chr10	110789636	110790353	*	+ 2 fold & sig. in E2	E2 vs DMSO	3.17997129673137	7.15496509829713e-07	Intron (ENST00000369519.4/282996, intron 5 of 13)	-33235	ENSG00000203867	RBM20	RNA binding motif protein 20
chr10	110918411	110919553	*	+ 2 fold & sig. in E2	E2 vs DMSO	1.01199904500962	0.00186888398613906	Promoter	0	ENSG00000108061	SHOC2	SHOC2 leucine rich repeat scaffold protein
chr10	11146472	11147143	*	+ 2 fold & sig. in E2	E2 vs DMSO	7.66933752081995	0.000729034173883544	Intron (ENST00000637215.1/10659, intron 2 of 14)	-17887	ENSG00000048740	CELF2	CUGBP Elav-like family member 2
chr10	111901	113075	*	+ 2 fold & sig. in E2	E2 vs DMSO	2.62001404843647	0.000129068536170433	Distal Intergenic	-17013	ENSG00000015171	ZMYND11	zinc finger MYND-type containing 11
chr10	112053841	112054360	*	+ 2 fold & sig. in E2	E2 vs DMSO	3.21577025342344	0.0114330025067411	Distal Intergenic	129350	ENSG00000119927	GPAM	glycerol-3-phosphate acyltransferase, mitochondrial
chr10	112295826	112296823	*	+ 2 fold & sig. in E2	E2 vs DMSO	2.12436830248647	0.000105984864548681	Intron (ENST00000643850.1/6975, intron 7 of 10)	-2789	ENSG00000276857	MIR6715A	microRNA 6715a
chr10	112485337	112485830	*	+ 2 fold & sig. in E2	E2 vs DMSO	7.63990602210273	0.000782102333208919	Intron (ENST00000705995.1/143187, intron 3 of 8)	-37765	ENSG00000023041	ZDHHC6	zinc finger DHHC-type palmitoyltransferase 6
chr10	112804060	112805020	*	+ 2 fold & sig. in E2	E2 vs DMSO	1.67738629866448	0.00053475538075248	Intron (ENST00000705995.1/143187, intron 8 of 8)	-18470	ENSG00000260917	LOC103344931	uncharacterized LOC103344931
chr10	113425423	113426670	*	+ 2 fold & sig. in E2	E2 vs DMSO	2.41400578039613	6.00948867616313e-06	Distal Intergenic	65384	ENSG00000286289	LOC107984270	uncharacterized LOC107984270
chr10	113524017	113524624	*	+ 2 fold & sig. in E2	E2 vs DMSO	2.88463210696186	0.00258786796617317	Distal Intergenic	-26213	ENSG00000148702	HABP2	hyaluronan binding protein 2
chr10	113581928	113582788	*	+ 2 fold & sig. in E2	E2 vs DMSO	1.34107671111577	0.0399303333118683	Exon (ENST00000542051.5/3026, exon 9 of 13)	14444	ENSG00000148702	HABP2	hyaluronan binding protein 2
chr10	113585946	113586314	*	+ 2 fold & sig. in E2	E2 vs DMSO	3.96863970089025	1.18190464248259e-06	Intron (ENST00000542051.5/3026, intron 12 of 12)	18462	ENSG00000148702	HABP2	hyaluronan binding protein 2
chr10	113589134	113590091	*	+ 2 fold & sig. in E2	E2 vs DMSO	5.21328661088793	3.53551690580916e-14	3' UTR	21650	ENSG00000148702	HABP2	hyaluronan binding protein 2
chr10	113616063	113616414	*	+ 2 fold & sig. in E2	E2 vs DMSO	6.10465702604489	0.048802934696705	Intron (ENST00000359988.4/4892, intron 26 of 41)	47627	ENSG00000197893	NRAP	nebulin related anchoring protein
chr10	113649707	113650264	*	+ 2 fold & sig. in E2	E2 vs DMSO	2.49261066965717	0.00385111874573623	Exon (ENST00000359988.4/4892, exon 9 of 42)	13777	ENSG00000197893	NRAP	nebulin related anchoring protein
chr10	113665565	113666516	*	+ 2 fold & sig. in E2	E2 vs DMSO	2.30788518248505	1.67297919257155e-08	Distal Intergenic	-1495	ENSG00000197893	NRAP	nebulin related anchoring protein
chr10	113958314	113959187	*	+ 2 fold & sig. in E2	E2 vs DMSO	3.62816867036716	1.42376488876968e-14	Distal Intergenic	-84679	ENSG00000043591	ADRB1	adrenoceptor beta 1
chr10	113959295	113959963	*	+ 2 fold & sig. in E2	E2 vs DMSO	2.60049207760457	2.63186025622153e-10	Distal Intergenic	-83903	ENSG00000043591	ADRB1	adrenoceptor beta 1
chr10	113960526	113960859	*	+ 2 fold & sig. in E2	E2 vs DMSO	3.20655833046059	2.35185652920404e-06	Distal Intergenic	-83007	ENSG00000043591	ADRB1	adrenoceptor beta 1
chr10	113966856	113967667	*	+ 2 fold & sig. in E2	E2 vs DMSO	2.92729581630256	2.78718410599504e-06	Distal Intergenic	-76199	ENSG00000043591	ADRB1	adrenoceptor beta 1
chr10	113982465	113983664	*	+ 2 fold & sig. in E2	E2 vs DMSO	3.5115929275647	1.07269279582541e-12	Distal Intergenic	-60202	ENSG00000043591	ADRB1	adrenoceptor beta 1
chr10	114008227	114008753	*	+ 2 fold & sig. in E2	E2 vs DMSO	3.58861025386033	3.35830242487349e-05	Distal Intergenic	-35113	ENSG00000043591	ADRB1	adrenoceptor beta 1
chr10	114026546	114027561	*	+ 2 fold & sig. in E2	E2 vs DMSO	2.51107011493521	1.60717911911607e-06	Distal Intergenic	-16305	ENSG00000043591	ADRB1	adrenoceptor beta 1
chr10	114042940	114044000	*	+ 2 fold & sig. in E2	E2 vs DMSO	1.89997207063563	3.16944599243753e-05	Promoter	0	ENSG00000043591	ADRB1	adrenoceptor beta 1
chr10	114044344	114044544	*	+ 2 fold & sig. in E2	E2 vs DMSO	7.07932701951072	0.00965446281349358	Promoter	478	ENSG00000043591	ADRB1	adrenoceptor beta 1
chr10	114056837	114057554	*	+ 2 fold & sig. in E2	E2 vs DMSO	4.35097639059739	1.33636651250512e-09	Distal Intergenic	12971	ENSG00000043591	ADRB1	adrenoceptor beta 1
chr10	114077879	114078902	*	+ 2 fold & sig. in E2	E2 vs DMSO	3.24355329653736	4.76921451424048e-09	Distal Intergenic	34013	ENSG00000043591	ADRB1	adrenoceptor beta 1
chr10	114100042	114101174	*	+ 2 fold & sig. in E2	E2 vs DMSO	2.36298369063041	8.09265191172317e-08	Distal Intergenic	30162	ENSG00000165813	CCDC186	coiled-coil domain containing 186
chr10	114174007	114174889	*	+ 2 fold & sig. in E2	E2 vs DMSO	1.07938397780283	0.0221387177011986	Promoter	0	ENSG00000284442	MIR2110	microRNA 2110
chr10	114239065	114239899	*	+ 2 fold & sig. in E2	E2 vs DMSO	3.12578153691117	6.32050977771904e-08	Promoter	0	ENSG00000165816	VWA2	von Willebrand factor A domain containing 2
chr10	114507345	114508444	*	+ 2 fold & sig. in E2	E2 vs DMSO	1.39871138432964	0.00177861589400267	Intron (ENST00000533213.7/3983, intron 6 of 22)	18391	ENSG00000099204	ABLIM1	actin binding LIM protein 1
chr10	115653379	115654014	*	+ 2 fold & sig. in E2	E2 vs DMSO	1.50339341435175	0.0174290499899673	Intron (ENST00000355044.8/26033, intron 26 of 28)	186205	ENSG00000107518	ATRNL1	attractin like 1
chr10	115708424	115709034	*	+ 2 fold & sig. in E2	E2 vs DMSO	1.16651922514615	0.00944727173511719	Intron (ENST00000355044.8/26033, intron 26 of 28)	-200317	ENSG00000107518	ATRNL1	attractin like 1
chr10	115879903	115880515	*	+ 2 fold & sig. in E2	E2 vs DMSO	2.79764221334598	0.00532581638341569	Intron (ENST00000355044.8/26033, intron 28 of 28)	-28836	ENSG00000107518	ATRNL1	attractin like 1
chr10	115919810	115920605	*	+ 2 fold & sig. in E2	E2 vs DMSO	2.26726415444784	0.000126928479349379	Intron (ENST00000355044.8/26033, intron 28 of 28)	10459	ENSG00000107518	ATRNL1	attractin like 1
chr10	115998024	115999015	*	+ 2 fold & sig. in E2	E2 vs DMSO	1.44631114143712	0.0439949578492363	Distal Intergenic	88673	ENSG00000107518	ATRNL1	attractin like 1
chr10	116080464	116081306	*	+ 2 fold & sig. in E2	E2 vs DMSO	1.47806401806946	0.000599599121736374	Intron (ENST00000369236.5/2674, intron 7 of 8)	171113	ENSG00000107518	ATRNL1	attractin like 1
chr10	116270873	116271499	*	+ 2 fold & sig. in E2	E2 vs DMSO	1.65610379557184	0.0486934289800996	Exon (ENST00000369236.5/2674, exon 2 of 9)	779	ENSG00000151892	GFRA1	GDNF family receptor alpha 1
chr10	117461507	117462556	*	+ 2 fold & sig. in E2	E2 vs DMSO	2.46691206222797	4.1061536030694e-06	Intron (ENST00000549104.1/105378502, intron 2 of 2)	32132	ENSG00000229847	EMX2OS	EMX2 opposite strand/antisense RNA
chr10	117483094	117483772	*	+ 2 fold & sig. in E2	E2 vs DMSO	2.04034185343532	0.0213229114994787	Intron (ENST00000549104.1/105378502, intron 2 of 2)	10916	ENSG00000229847	EMX2OS	EMX2 opposite strand/antisense RNA
chr10	117736473	117737296	*	+ 2 fold & sig. in E2	E2 vs DMSO	2.24155423615662	2.44591980095701e-08	Intron (ENST00000655405.1/102724627, intron 2 of 2)	1160	NA	LINC02674	long intergenic non-protein coding RNA 2674
chr10	118116743	118117355	*	+ 2 fold & sig. in E2	E2 vs DMSO	2.84975350438163	0.0342572465493899	Intron (ENST00000414722.5/255082, intron 3 of 3)	64612	ENSG00000177640	CASC2	cancer susceptibility 2
chr10	118285580	118286224	*	+ 2 fold & sig. in E2	E2 vs DMSO	3.91939491068443	0.000483138343941532	Distal Intergenic	25262	ENSG00000165669	FAM204A	family with sequence similarity 204 member A
chr10	118798033	118798609	*	+ 2 fold & sig. in E2	E2 vs DMSO	3.2707709126651	0.000281531404208418	Intron (ENST00000663084.1/124902512, intron 3 of 3)	-42784	ENSG00000151893	CACUL1	CDK2 associated cullin domain 1
chr10	119080635	119081728	*	+ 2 fold & sig. in E2	E2 vs DMSO	2.63631559730459	1.08023615506191e-08	Promoter	0	ENSG00000107581	EIF3A	eukaryotic translation initiation factor 3 subunit A
chr10	119104013	119104526	*	+ 2 fold & sig. in E2	E2 vs DMSO	7.23526580925484	0.00394709571317857	Promoter	0	ENSG00000119979	DENND10	DENN domain containing 10
chr10	119315502	119316008	*	+ 2 fold & sig. in E2	E2 vs DMSO	1.98789521796225	0.000878025846011886	Intron (ENST00000392870.3/2869, intron 1 of 15)	19949	NA	LOC105378511	uncharacterized LOC105378511
chr10	119316977	119317979	*	+ 2 fold & sig. in E2	E2 vs DMSO	3.91777749143828	1.76351680567215e-12	Intron (ENST00000392870.3/2869, intron 1 of 15)	17978	NA	LOC105378511	uncharacterized LOC105378511
chr10	119542434	119543611	*	+ 2 fold & sig. in E2	E2 vs DMSO	5.99440328679662	2.27378201359267e-09	Promoter	0	ENSG00000148908	RGS10	regulator of G protein signaling 10
chr10	119667670	119668376	*	+ 2 fold & sig. in E2	E2 vs DMSO	1.12257046548088	0.00938805958880122	Intron (ENST00000369085.8/9531, intron 1 of 3)	11060	ENSG00000151929	BAG3	BAG cochaperone 3
chr10	12053373	12054231	*	+ 2 fold & sig. in E2	E2 vs DMSO	1.48221442144054	0.0160088239827762	Distal Intergenic	-10203	ENSG00000151461	UPF2	UPF2 regulator of nonsense mediated mRNA decay
chr10	120931613	120932377	*	+ 2 fold & sig. in E2	E2 vs DMSO	7.98139469357658	0.000178634716372677	Intron (ENST00000414774.1/105378519, intron 1 of 1)	27548	ENSG00000120008	WDR11	WD repeat domain 11
chr10	120945870	120946529	*	+ 2 fold & sig. in E2	E2 vs DMSO	3.35457703923995	0.0075769731412084	Intron (ENST00000414774.1/105378519, intron 1 of 1)	34171	NA	LOC105378519	uncharacterized LOC105378519
chr10	121245671	121246469	*	+ 2 fold & sig. in E2	E2 vs DMSO	1.74221862179009	0.0160829029709668	Distal Intergenic	66971	ENSG00000227143	LINC01153	long intergenic non-protein coding RNA 1153
chr10	121324608	121325257	*	+ 2 fold & sig. in E2	E2 vs DMSO	1.55421979277928	0.00218875434553997	Distal Intergenic	145908	ENSG00000227143	LINC01153	long intergenic non-protein coding RNA 1153
chr10	121523325	121524170	*	+ 2 fold & sig. in E2	E2 vs DMSO	1.68874264648001	0.0187205043426991	Intron (ENST00000358487.10/2263, intron 6 of 17)	2080	ENSG00000066468	FGFR2	fibroblast growth factor receptor 2
chr10	121554839	121555351	*	+ 2 fold & sig. in E2	E2 vs DMSO	1.62697321917806	0.000420938826643204	Promoter	-579	ENSG00000066468	FGFR2	fibroblast growth factor receptor 2
chr10	121590025	121590757	*	+ 2 fold & sig. in E2	E2 vs DMSO	8.41142371128167	2.25963767403138e-05	Intron (ENST00000358487.10/2263, intron 2 of 17)	3007	ENSG00000066468	FGFR2	fibroblast growth factor receptor 2
chr10	122112276	122113818	*	+ 2 fold & sig. in E2	E2 vs DMSO	1.91828834034067	0.00554270108002719	Promoter	0	ENSG00000138162	TACC2	transforming acidic coiled-coil containing protein 2
chr10	122183078	122183859	*	+ 2 fold & sig. in E2	E2 vs DMSO	2.47169726474605	0.0137433085114636	Intron (ENST00000369005.6/10579, intron 7 of 22)	-8589	ENSG00000138162	TACC2	transforming acidic coiled-coil containing protein 2
chr10	123129405	123130043	*	+ 2 fold & sig. in E2	E2 vs DMSO	2.94872634989867	0.0244473796315862	Distal Intergenic	-5927	ENSG00000188620	HMX3	H6 family homeobox 3
chr10	123636631	123637585	*	+ 2 fold & sig. in E2	E2 vs DMSO	1.26917958079783	0.00890163949515053	Distal Intergenic	-28770	ENSG00000154478	GPR26	G protein-coupled receptor 26
chr10	123721452	123722535	*	+ 2 fold & sig. in E2	E2 vs DMSO	4.3390224801085	5.37221618137422e-14	Intron (ENST00000368854.7/119587, intron 15 of 19)	-54135	NA	LOC105378533	uncharacterized LOC105378533
chr10	123750838	123751817	*	+ 2 fold & sig. in E2	E2 vs DMSO	3.14678000723034	2.39148919469238e-06	Intron (ENST00000368854.7/119587, intron 15 of 19)	-24853	NA	LOC105378533	uncharacterized LOC105378533
chr10	123759383	123760087	*	+ 2 fold & sig. in E2	E2 vs DMSO	2.21723324601523	0.0413809901746649	Intron (ENST00000368854.7/119587, intron 13 of 19)	-16583	NA	LOC105378533	uncharacterized LOC105378533
chr10	123798944	123799582	*	+ 2 fold & sig. in E2	E2 vs DMSO	3.22531343162572	3.20069495536957e-05	5' UTR	22274	NA	LOC105378533	uncharacterized LOC105378533
chr10	124056511	124057177	*	+ 2 fold & sig. in E2	E2 vs DMSO	3.57087775206729	3.13497960487656e-06	Intron (ENST00000346248.7/51363, intron 1 of 7)	-17892	ENSG00000182022	CHST15	carbohydrate sulfotransferase 15
chr10	124092329	124093946	*	+ 2 fold & sig. in E2	E2 vs DMSO	1.66960413180733	0.00121819494129577	Promoter	0	ENSG00000182022	CHST15	carbohydrate sulfotransferase 15
chr10	124339815	124340566	*	+ 2 fold & sig. in E2	E2 vs DMSO	3.36779508556336	4.51185533413529e-06	Distal Intergenic	62770	ENSG00000065154	OAT	ornithine aminotransferase
chr10	124341684	124342175	*	+ 2 fold & sig. in E2	E2 vs DMSO	1.79181829242993	0.017646400319067	Distal Intergenic	61161	ENSG00000065154	OAT	ornithine aminotransferase
chr10	124385861	124386799	*	+ 2 fold & sig. in E2	E2 vs DMSO	2.1421502009922	9.35615766277055e-07	Distal Intergenic	16537	ENSG00000065154	OAT	ornithine aminotransferase
chr10	125014397	125015676	*	+ 2 fold & sig. in E2	E2 vs DMSO	1.3927329837851	0.000351932752435371	Intron (ENST00000309035.11/1488, intron 1 of 8)	-8384	ENSG00000175029	CTBP2	C-terminal binding protein 2
chr10	125025693	125026022	*	+ 2 fold & sig. in E2	E2 vs DMSO	1.53893145239289	0.0409067400001641	Intron (ENST00000309035.11/1488, intron 1 of 8)	2006	ENSG00000175029	CTBP2	C-terminal binding protein 2
chr10	125029452	125030119	*	+ 2 fold & sig. in E2	E2 vs DMSO	1.53206297544608	0.000237456062769203	Intron (ENST00000337195.10/1488, intron 3 of 10)	-1381	ENSG00000175029	CTBP2	C-terminal binding protein 2
chr10	125045579	125046207	*	+ 2 fold & sig. in E2	E2 vs DMSO	1.39698107278035	0.00184700041055424	Intron (ENST00000337195.10/1488, intron 2 of 10)	-12709	ENSG00000264572	MIR4296	microRNA 4296
chr10	125129165	125130037	*	+ 2 fold & sig. in E2	E2 vs DMSO	3.16636179660285	5.95234481096651e-12	Intron (ENST00000337195.10/1488, intron 1 of 10)	8213	ENSG00000175029	CTBP2	C-terminal binding protein 2
chr10	125160785	125162884	*	+ 2 fold & sig. in E2	E2 vs DMSO	1.38356176453991	0.00111756481125136	Promoter	0	ENSG00000175029	CTBP2	C-terminal binding protein 2
chr10	125514784	125515557	*	+ 2 fold & sig. in E2	E2 vs DMSO	1.51287327182099	0.000370822317322857	Distal Intergenic	-58814	ENSG00000237675	TEX36-AS1	TEX36 antisense RNA 1
chr10	125633623	125634570	*	+ 2 fold & sig. in E2	E2 vs DMSO	3.37220236595228	2.86713141292681e-07	Intron (ENST00000532135.5/387718, intron 3 of 3)	48536	ENSG00000175018	TEX36	testis expressed 36
chr10	125694842	125695524	*	+ 2 fold & sig. in E2	E2 vs DMSO	1.54168646665834	0.023501770034709	Intron (ENST00000596068.5/283038, intron 2 of 5)	-2005	ENSG00000228021	LOC283038	uncharacterized LOC283038
chr10	125701493	125702249	*	+ 2 fold & sig. in E2	E2 vs DMSO	3.72906478337616	2.15866389476369e-07	Intron (ENST00000596068.5/283038, intron 4 of 5)	2632	ENSG00000228021	LOC283038	uncharacterized LOC283038
chr10	125896249	125896890	*	+ 2 fold & sig. in E2	E2 vs DMSO	2.80091687765667	0.0360563200690645	Promoter	0	ENSG00000089876	DHX32	DEAH-box helicase 32 (putative)
chr10	126058104	126058881	*	+ 2 fold & sig. in E2	E2 vs DMSO	2.93533189662756	1.17604198950995e-05	Intron (ENST00000368679.8/8038, intron 14 of 22)	8125	ENSG00000148848	ADAM12	ADAM metallopeptidase domain 12
chr10	126059353	126060063	*	+ 2 fold & sig. in E2	E2 vs DMSO	2.5754071891382	1.21408385980749e-06	Intron (ENST00000368679.8/8038, intron 14 of 22)	6943	ENSG00000148848	ADAM12	ADAM metallopeptidase domain 12
chr10	126062287	126062881	*	+ 2 fold & sig. in E2	E2 vs DMSO	3.32334672549723	4.87777835240853e-07	Intron (ENST00000368679.8/8038, intron 14 of 22)	4125	ENSG00000148848	ADAM12	ADAM metallopeptidase domain 12
chr10	126066423	126067060	*	+ 2 fold & sig. in E2	E2 vs DMSO	2.45987132818369	0.000747191382488911	Promoter	0	ENSG00000148848	ADAM12	ADAM metallopeptidase domain 12
chr10	126175731	126176373	*	+ 2 fold & sig. in E2	E2 vs DMSO	2.8925030067621	4.90326148340844e-05	Intron (ENST00000368679.8/8038, intron 3 of 22)	-20426	ENSG00000148848	ADAM12	ADAM metallopeptidase domain 12
chr10	126508765	126509406	*	+ 2 fold & sig. in E2	E2 vs DMSO	2.8669677709354	0.00354121748336885	Intron (ENST00000488181.3/118611, intron 3 of 9)	-4647	ENSG00000154493	C10orf90	chromosome 10 open reading frame 90
chr10	126543546	126544193	*	+ 2 fold & sig. in E2	E2 vs DMSO	6.86321228591389	0.0122285927050752	Intron (ENST00000488181.3/118611, intron 2 of 9)	-18723	ENSG00000154493	C10orf90	chromosome 10 open reading frame 90
chr10	126549	127286	*	+ 2 fold & sig. in E2	E2 vs DMSO	2.22444116996906	0.010598506341685	Distal Intergenic	-2802	ENSG00000015171	ZMYND11	zinc finger MYND-type containing 11
chr10	126902159	126902768	*	+ 2 fold & sig. in E2	E2 vs DMSO	2.5727846773865	0.010570001260401	Distal Intergenic	-2641	ENSG00000150760	DOCK1	dedicator of cytokinesis 1
chr10	126905812	126906330	*	+ 2 fold & sig. in E2	E2 vs DMSO	2.86261361683156	0.0359605748510086	Promoter	384	ENSG00000150760	DOCK1	dedicator of cytokinesis 1
chr10	126918101	126918921	*	+ 2 fold & sig. in E2	E2 vs DMSO	4.95424390211482	4.68508910760796e-12	Intron (ENST00000280333.9/1793, intron 1 of 51)	12673	ENSG00000150760	DOCK1	dedicator of cytokinesis 1
chr10	126935355	126936132	*	+ 2 fold & sig. in E2	E2 vs DMSO	5.00635234168871	1.78301373410635e-12	Intron (ENST00000280333.9/1793, intron 1 of 51)	29927	ENSG00000150760	DOCK1	dedicator of cytokinesis 1
chr10	126940633	126941290	*	+ 2 fold & sig. in E2	E2 vs DMSO	1.92285340531635	0.000247770142850542	Intron (ENST00000280333.9/1793, intron 1 of 51)	35205	ENSG00000150760	DOCK1	dedicator of cytokinesis 1
chr10	127329053	127329573	*	+ 2 fold & sig. in E2	E2 vs DMSO	3.5340246079427	0.00338577588012047	Intron (ENST00000280333.9/1793, intron 29 of 51)	80985	ENSG00000150760	DOCK1	dedicator of cytokinesis 1
chr10	127906631	127907053	*	+ 2 fold & sig. in E2	E2 vs DMSO	1.05974755429369	0.0115210257422274	Promoter	-50	ENSG00000132334	PTPRE	protein tyrosine phosphatase receptor type E
chr10	127922899	127923478	*	+ 2 fold & sig. in E2	E2 vs DMSO	1.55421606111425	0.0136686606198866	Intron (ENST00000254667.8/5791, intron 1 of 20)	11039	NA	NA	NA
chr10	127945146	127946056	*	+ 2 fold & sig. in E2	E2 vs DMSO	1.57740947155869	3.12902540842655e-05	Intron (ENST00000254667.8/5791, intron 1 of 20)	-10629	NA	NA	NA
chr10	128194671	128195242	*	+ 2 fold & sig. in E2	E2 vs DMSO	3.62005559707702	0.00255986455860966	Intron (ENST00000626518.2/101927381, intron 1 of 3)	13535	ENSG00000280953	LINC01163	long intergenic non-protein coding RNA 1163
chr10	128541011	128541923	*	+ 2 fold & sig. in E2	E2 vs DMSO	2.34180064966638	0.00122438064279849	Distal Intergenic	-220797	NA	NA	NA
chr10	12875066	12875430	*	+ 2 fold & sig. in E2	E2 vs DMSO	1.34764734567825	0.0376868871286077	Distal Intergenic	-2029	NA	LOC105376418	uncharacterized LOC105376418
chr10	129036661	129037562	*	+ 2 fold & sig. in E2	E2 vs DMSO	1.51365852706787	0.0389913406349786	Promoter	0	NA	NA	NA
chr10	129415678	129416192	*	+ 2 fold & sig. in E2	E2 vs DMSO	6.75457327066811	0.0170642381052978	Distal Intergenic	-34925	NA	LOC105378557	uncharacterized LOC105378557
chr10	131098644	131099564	*	+ 2 fold & sig. in E2	E2 vs DMSO	1.96547429372695	0.0217747231731139	Intron (ENST00000483040.1/256536, intron 10 of 11)	3426	ENSG00000230098	TCERG1L-AS1	TCERG1L antisense RNA 1
chr10	131621517	131622593	*	+ 2 fold & sig. in E2	E2 vs DMSO	1.12359651770117	0.0136970987081467	Distal Intergenic	154809	ENSG00000189275	LINC01164	long intergenic non-protein coding RNA 1164
chr10	131654598	131655655	*	+ 2 fold & sig. in E2	E2 vs DMSO	1.73720214202906	1.23123238135491e-05	Distal Intergenic	121747	ENSG00000189275	LINC01164	long intergenic non-protein coding RNA 1164
chr10	131919453	131920569	*	+ 2 fold & sig. in E2	E2 vs DMSO	1.20326412496472	0.000917350003526047	Intron (ENST00000455566.6/55844, intron 2 of 8)	18162	ENSG00000175470	PPP2R2D	protein phosphatase 2 regulatory subunit Bdelta
chr10	132163045	132163937	*	+ 2 fold & sig. in E2	E2 vs DMSO	1.02973963370834	0.00218750408269887	Exon (ENST00000668452.1/282973, exon 20 of 24)	1262	ENSG00000188385	JAKMIP3	Janus kinase and microtubule interacting protein 3
chr10	132164546	132165324	*	+ 2 fold & sig. in E2	E2 vs DMSO	1.08357632150062	0.00488617747200705	Exon (ENST00000668452.1/282973, exon 21 of 24)	2763	ENSG00000188385	JAKMIP3	Janus kinase and microtubule interacting protein 3
chr10	132265342	132266234	*	+ 2 fold & sig. in E2	E2 vs DMSO	1.94936638404581	2.3670370778067e-06	Intron (ENST00000368622.5/282974, intron 1 of 11)	-16234	ENSG00000165752	STK32C	serine/threonine kinase 32C
chr10	132307906	132308706	*	+ 2 fold & sig. in E2	E2 vs DMSO	2.26332228819183	0.000615221141637995	Promoter	0	ENSG00000165752	STK32C	serine/threonine kinase 32C
chr10	132447893	132448205	*	+ 2 fold & sig. in E2	E2 vs DMSO	1.90013160765146	0.0326541056167082	Exon (ENST00000490765.4/170393, exon 3 of 3)	908	NA	LINC02870	long intergenic non-protein coding RNA 2870
chr10	132448310	132448788	*	+ 2 fold & sig. in E2	E2 vs DMSO	1.67389662648893	0.0268953493420378	Exon (ENST00000392630.7/170393, exon 3 of 3)	1325	NA	LINC02870	long intergenic non-protein coding RNA 2870
chr10	132452903	132453533	*	+ 2 fold & sig. in E2	E2 vs DMSO	2.09924704159999	0.00100696344270641	Distal Intergenic	5918	NA	LINC02870	long intergenic non-protein coding RNA 2870
chr10	132461447	132462150	*	+ 2 fold & sig. in E2	E2 vs DMSO	1.94185835928689	2.40771823076486e-06	Distal Intergenic	14462	NA	LINC02870	long intergenic non-protein coding RNA 2870
chr10	132467411	132468279	*	+ 2 fold & sig. in E2	E2 vs DMSO	1.21785288238294	0.00475797155239038	Distal Intergenic	20426	NA	LINC02870	long intergenic non-protein coding RNA 2870
chr10	132469180	132469566	*	+ 2 fold & sig. in E2	E2 vs DMSO	2.1012472853153	0.00367607530701032	Distal Intergenic	22195	NA	LINC02870	long intergenic non-protein coding RNA 2870
chr10	132479967	132480810	*	+ 2 fold & sig. in E2	E2 vs DMSO	2.7539057106542	1.62438198000308e-05	Distal Intergenic	32982	NA	LINC02870	long intergenic non-protein coding RNA 2870
chr10	132493217	132494154	*	+ 2 fold & sig. in E2	E2 vs DMSO	2.50614249910755	1.27395389705028e-10	Distal Intergenic	22985	NA	LOC107984282	uncharacterized LOC107984282
chr10	132516671	132517709	*	+ 2 fold & sig. in E2	E2 vs DMSO	1.6113856874534	1.8869753025579e-06	Promoter	0	NA	LOC107984282	uncharacterized LOC107984282
chr10	132532692	132533231	*	+ 2 fold & sig. in E2	E2 vs DMSO	1.03618595722764	0.00641341563716736	Distal Intergenic	-4556	ENSG00000068383	INPP5A	inositol polyphosphate-5-phosphatase A
chr10	132533573	132533896	*	+ 2 fold & sig. in E2	E2 vs DMSO	2.19105333527769	0.000230931237881654	Distal Intergenic	-3891	ENSG00000068383	INPP5A	inositol polyphosphate-5-phosphatase A
chr10	132537274	132537864	*	+ 2 fold & sig. in E2	E2 vs DMSO	2.97667604199299	1.00540085856619e-10	Promoter	0	ENSG00000068383	INPP5A	inositol polyphosphate-5-phosphatase A
chr10	132539250	132539797	*	+ 2 fold & sig. in E2	E2 vs DMSO	3.35619790269523	1.10948562678608e-10	Intron (ENST00000368594.8/3632, intron 1 of 15)	1111	ENSG00000068383	INPP5A	inositol polyphosphate-5-phosphatase A
chr10	132549128	132549949	*	+ 2 fold & sig. in E2	E2 vs DMSO	4.40674929854752	5.63807779565047e-14	Intron (ENST00000368594.8/3632, intron 1 of 15)	10989	ENSG00000068383	INPP5A	inositol polyphosphate-5-phosphatase A
chr10	132555408	132555768	*	+ 2 fold & sig. in E2	E2 vs DMSO	2.6293834296349	4.64933201237099e-06	Intron (ENST00000368594.8/3632, intron 1 of 15)	17269	ENSG00000068383	INPP5A	inositol polyphosphate-5-phosphatase A
chr10	132556706	132557813	*	+ 2 fold & sig. in E2	E2 vs DMSO	2.92543613181807	1.2192638738386e-11	Intron (ENST00000368594.8/3632, intron 1 of 15)	18567	ENSG00000068383	INPP5A	inositol polyphosphate-5-phosphatase A
chr10	132566823	132567371	*	+ 2 fold & sig. in E2	E2 vs DMSO	3.15725311719746	7.24574612463789e-08	Intron (ENST00000368594.8/3632, intron 1 of 15)	28684	ENSG00000068383	INPP5A	inositol polyphosphate-5-phosphatase A
chr10	132571822	132572772	*	+ 2 fold & sig. in E2	E2 vs DMSO	3.1721083099706	2.08770650699304e-13	Intron (ENST00000368594.8/3632, intron 1 of 15)	33683	ENSG00000068383	INPP5A	inositol polyphosphate-5-phosphatase A
chr10	132575032	132575825	*	+ 2 fold & sig. in E2	E2 vs DMSO	1.46614385636754	6.45107493381196e-05	Intron (ENST00000368594.8/3632, intron 1 of 15)	-32101	ENSG00000068383	INPP5A	inositol polyphosphate-5-phosphatase A
chr10	132643578	132644531	*	+ 2 fold & sig. in E2	E2 vs DMSO	1.46463396475656	0.0364851942968491	Intron (ENST00000368594.8/3632, intron 2 of 15)	35652	ENSG00000068383	INPP5A	inositol polyphosphate-5-phosphatase A
chr10	132674523	132675012	*	+ 2 fold & sig. in E2	E2 vs DMSO	2.73176502126676	0.00610120451088613	Intron (ENST00000368594.8/3632, intron 4 of 15)	-15380	ENSG00000068383	INPP5A	inositol polyphosphate-5-phosphatase A
chr10	132685089	132686113	*	+ 2 fold & sig. in E2	E2 vs DMSO	1.98022633969304	1.7233178421776e-06	Intron (ENST00000368594.8/3632, intron 4 of 15)	-4279	ENSG00000068383	INPP5A	inositol polyphosphate-5-phosphatase A
chr10	132758932	132759324	*	+ 2 fold & sig. in E2	E2 vs DMSO	3.10973877365781	3.81645743789964e-05	Intron (ENST00000368594.8/3632, intron 11 of 15)	-6500	ENSG00000068383	INPP5A	inositol polyphosphate-5-phosphatase A
chr10	132761136	132761372	*	+ 2 fold & sig. in E2	E2 vs DMSO	2.97448105967272	1.65525012512919e-06	Intron (ENST00000368594.8/3632, intron 11 of 15)	-4452	ENSG00000068383	INPP5A	inositol polyphosphate-5-phosphatase A
chr10	132764075	132765562	*	+ 2 fold & sig. in E2	E2 vs DMSO	4.11192919303179	1.33462861707689e-15	Promoter	-262	ENSG00000068383	INPP5A	inositol polyphosphate-5-phosphatase A
chr10	132915045	132915832	*	+ 2 fold & sig. in E2	E2 vs DMSO	5.076020559087	4.46343610071121e-11	Intron (ENST00000368586.10/54777, intron 17 of 57)	850	ENSG00000171811	CFAP46	cilia and flagella associated protein 46
chr10	132916454	132916909	*	+ 2 fold & sig. in E2	E2 vs DMSO	3.37935518095914	0.00012111927902922	Promoter	0	ENSG00000171811	CFAP46	cilia and flagella associated protein 46
chr10	1329179	1329823	*	+ 2 fold & sig. in E2	E2 vs DMSO	7.45607525275765	0.00191952362867839	Intron (ENST00000381312.6/105, intron 3 of 9)	-88649	ENSG00000185736	ADARB2	adenosine deaminase RNA specific B2 (inactive)
chr10	132984782	132985751	*	+ 2 fold & sig. in E2	E2 vs DMSO	1.60780461383409	0.00118757167337604	Distal Intergenic	19197	ENSG00000240707	LINC01168	long intergenic non-protein coding RNA 1168
chr10	132999822	133000575	*	+ 2 fold & sig. in E2	E2 vs DMSO	1.7322374721133	0.0277995548621901	Distal Intergenic	-13078	NA	LOC112268067	uncharacterized LOC112268067
chr10	133280436	133280813	*	+ 2 fold & sig. in E2	E2 vs DMSO	4.25748655517551	1.46494543407641e-12	Intron (ENST00000252936.8/10844, intron 17 of 17)	709	ENSG00000130640	TUBGCP2	tubulin gamma complex associated protein 2
chr10	133304051	133304821	*	+ 2 fold & sig. in E2	E2 vs DMSO	3.20895735964985	1.57075522360351e-06	Intron (ENST00000252936.8/10844, intron 1 of 17)	-1070	ENSG00000130640	TUBGCP2	tubulin gamma complex associated protein 2
chr10	133308927	133309546	*	+ 2 fold & sig. in E2	E2 vs DMSO	1.64091511255082	0.00675648116805001	Promoter	0	NA	ZNF511-PRAP1	ZNF511-PRAP1 readthrough
chr10	14407369	14408195	*	+ 2 fold & sig. in E2	E2 vs DMSO	1.47112337047502	0.0129503923596661	Intron (ENST00000493380.5/55691, intron 1 of 3)	-24092	ENSG00000266321	MIR4293	microRNA 4293
chr10	15248536	15249061	*	+ 2 fold & sig. in E2	E2 vs DMSO	3.0564898276695	0.0227356439095213	Promoter	0	ENSG00000148468	FAM171A1	family with sequence similarity 171 member A1
chr10	15461115	15461989	*	+ 2 fold & sig. in E2	E2 vs DMSO	4.40687148789659	1.34224775994757e-11	Distal Intergenic	-89826	ENSG00000148468	FAM171A1	family with sequence similarity 171 member A1
chr10	17453235	17454013	*	+ 2 fold & sig. in E2	E2 vs DMSO	2.53827634327681	0.00265517782115766	Promoter	183	ENSG00000148488	ST8SIA6	ST8 alpha-N-acetyl-neuraminide alpha-2,8-sialyltransferase 6
chr10	19232230	19232980	*	+ 2 fold & sig. in E2	E2 vs DMSO	2.01723508329446	0.0126459712222194	Intron (ENST00000454679.7/340895, intron 18 of 39)	28380	ENSG00000204740	MALRD1	MAM and LDL receptor class A domain containing 1
chr10	19904019	19904681	*	+ 2 fold & sig. in E2	E2 vs DMSO	2.21159325818164	2.56633695114136e-07	Intron (ENST00000377242.7/84898, intron 1 of 12)	87587	ENSG00000120594	PLXDC2	plexin domain containing 2
chr10	21174050	21174948	*	+ 2 fold & sig. in E2	E2 vs DMSO	1.68914913391058	0.00951101886914168	Promoter	0	ENSG00000231920	NEBL-AS1	NEBL antisense RNA 1
chr10	21272367	21273313	*	+ 2 fold & sig. in E2	E2 vs DMSO	1.432114005919	0.000311693791327807	Intron (ENST00000675702.1/10529, intron 1 of 8)	19698	ENSG00000078114	NEBL	nebulette
chr10	21630268	21631045	*	+ 2 fold & sig. in E2	E2 vs DMSO	3.46761479815501	6.13875087875473e-10	Intron (ENST00000631589.1/8028, intron 8 of 22)	5577	ENSG00000078403	MLLT10	MLLT10 histone lysine methyltransferase DOT1L cofactor
chr10	22002687	22004039	*	+ 2 fold & sig. in E2	E2 vs DMSO	1.16426520813425	0.0165107487760332	Promoter	0	ENSG00000136770	DNAJC1	DnaJ heat shock protein family (Hsp40) member C1
chr10	22481698	22482677	*	+ 2 fold & sig. in E2	E2 vs DMSO	1.76534314857307	0.0123812864886633	Distal Intergenic	-3672	NA	NA	NA
chr10	22582887	22584159	*	+ 2 fold & sig. in E2	E2 vs DMSO	2.6742305681025	4.00498908803559e-11	Intron (ENST00000376573.9/5305, intron 4 of 9)	7516	ENSG00000150867	PIP4K2A	phosphatidylinositol-5-phosphate 4-kinase type 2 alpha
chr10	22598318	22598827	*	+ 2 fold & sig. in E2	E2 vs DMSO	2.72248059490113	0.00116416325857276	Intron (ENST00000376573.9/5305, intron 3 of 9)	-6605	ENSG00000150867	PIP4K2A	phosphatidylinositol-5-phosphate 4-kinase type 2 alpha
chr10	22620168	22620920	*	+ 2 fold & sig. in E2	E2 vs DMSO	2.41634115685559	2.45784843079205e-06	Intron (ENST00000376573.9/5305, intron 1 of 9)	-10451	ENSG00000150867	PIP4K2A	phosphatidylinositol-5-phosphate 4-kinase type 2 alpha
chr10	22632960	22634142	*	+ 2 fold & sig. in E2	E2 vs DMSO	2.6261824713566	2.24291569497898e-11	Intron (ENST00000376573.9/5305, intron 1 of 9)	-23243	ENSG00000150867	PIP4K2A	phosphatidylinositol-5-phosphate 4-kinase type 2 alpha
chr10	22672349	22673102	*	+ 2 fold & sig. in E2	E2 vs DMSO	1.2709928458435	0.00641341563716736	Intron (ENST00000376573.9/5305, intron 1 of 9)	41006	ENSG00000150867	PIP4K2A	phosphatidylinositol-5-phosphate 4-kinase type 2 alpha
chr10	22712967	22714350	*	+ 2 fold & sig. in E2	E2 vs DMSO	2.12147877480464	0.0124415597684905	Promoter	0	ENSG00000150867	PIP4K2A	phosphatidylinositol-5-phosphate 4-kinase type 2 alpha
chr10	22726773	22727875	*	+ 2 fold & sig. in E2	E2 vs DMSO	3.1530090554838	9.89680892422384e-09	Distal Intergenic	-12195	ENSG00000150867	PIP4K2A	phosphatidylinositol-5-phosphate 4-kinase type 2 alpha
chr10	22844332	22844800	*	+ 2 fold & sig. in E2	E2 vs DMSO	2.62061117514675	0.00167666203555068	Distal Intergenic	-83224	ENSG00000165309	ARMC3	armadillo repeat containing 3
chr10	22855032	22855614	*	+ 2 fold & sig. in E2	E2 vs DMSO	2.46580764374346	0.0146205216199783	Distal Intergenic	-72410	ENSG00000165309	ARMC3	armadillo repeat containing 3
chr10	23047346	23048087	*	+ 2 fold & sig. in E2	E2 vs DMSO	1.61968816349907	0.0251688172220071	Intron (ENST00000655837.1/107984215, intron 2 of 4)	16715	ENSG00000165309	ARMC3	armadillo repeat containing 3
chr10	23056070	23056595	*	+ 2 fold & sig. in E2	E2 vs DMSO	3.75370123828133	0.00165667605440532	Intron (ENST00000655837.1/107984215, intron 2 of 4)	25439	ENSG00000165309	ARMC3	armadillo repeat containing 3
chr10	23081159	23082091	*	+ 2 fold & sig. in E2	E2 vs DMSO	2.04615226269743	1.03920398764715e-05	Intron (ENST00000655837.1/107984215, intron 1 of 4)	13006	NA	LOC107984215	uncharacterized LOC107984215
chr10	25334497	25334872	*	+ 2 fold & sig. in E2	E2 vs DMSO	6.20417619707903	0.0434189453950547	Intron (ENST00000650135.1/57512, intron 3 of 11)	-131318	ENSG00000151025	GPR158	G protein-coupled receptor 158
chr10	264426	265531	*	+ 2 fold & sig. in E2	E2 vs DMSO	1.53561879740022	4.1555036613863e-05	Distal Intergenic	19955	ENSG00000015171	ZMYND11	zinc finger MYND-type containing 11
chr10	26981709	26982722	*	+ 2 fold & sig. in E2	E2 vs DMSO	2.83404127434773	0.0018647231360969	3' UTR	31820	ENSG00000107890	ANKRD26	ankyrin repeat domain 26
chr10	27620851	27621681	*	+ 2 fold & sig. in E2	E2 vs DMSO	2.72954266622568	0.00505699761176368	Distal Intergenic	56421	NA	LINC02680	long intergenic non-protein coding RNA 2680
chr10	28256724	28257299	*	+ 2 fold & sig. in E2	E2 vs DMSO	2.60489760858856	5.87220477832866e-08	Intron (ENST00000337532.9/143098, intron 1 of 17)	-17987	ENSG00000150054	MPP7	membrane palmitoylated protein 7
chr10	28333943	28334782	*	+ 2 fold & sig. in E2	E2 vs DMSO	1.12356230102835	0.0126231647589666	Promoter	0	ENSG00000150054	MPP7	membrane palmitoylated protein 7
chr10	28477977	28478496	*	+ 2 fold & sig. in E2	E2 vs DMSO	6.74390472722551	0.0125579891005934	Intron (ENST00000421132.1/105376468, intron 1 of 2)	17317	ENSG00000237128	LINC02652	long intergenic non-protein coding RNA 2652
chr10	28660211	28660772	*	+ 2 fold & sig. in E2	E2 vs DMSO	2.05542677471661	0.0235363796749571	Distal Intergenic	-16738	ENSG00000095739	BAMBI	BMP and activin membrane bound inhibitor
chr10	28676878	28677738	*	+ 2 fold & sig. in E2	E2 vs DMSO	2.97659228941066	0.000789282893055362	Promoter	0	ENSG00000095739	BAMBI	BMP and activin membrane bound inhibitor
chr10	28900305	28900799	*	+ 2 fold & sig. in E2	E2 vs DMSO	2.22336858727645	0.00222282269227113	Intron (ENST00000646289.1/101929218, intron 2 of 7)	24707	ENSG00000232624	C10orf126	chromosome 10 open reading frame 126
chr10	28924993	28925965	*	+ 2 fold & sig. in E2	E2 vs DMSO	4.18648155852045	4.38818980710351e-14	Intron (ENST00000646289.1/101929218, intron 3 of 7)	49395	ENSG00000232624	C10orf126	chromosome 10 open reading frame 126
chr10	28939311	28940227	*	+ 2 fold & sig. in E2	E2 vs DMSO	2.37699249786026	5.32753101488147e-05	Intron (ENST00000646289.1/101929218, intron 7 of 7)	63713	ENSG00000232624	C10orf126	chromosome 10 open reading frame 126
chr10	29075029	29075498	*	+ 2 fold & sig. in E2	E2 vs DMSO	6.53540844280748	0.0197399688108922	Distal Intergenic	199431	ENSG00000232624	C10orf126	chromosome 10 open reading frame 126
chr10	29107807	29108508	*	+ 2 fold & sig. in E2	E2 vs DMSO	1.56103909238676	0.00105256609990422	Distal Intergenic	-180553	ENSG00000120563	LYZL1	lysozyme like 1
chr10	29303272	29304098	*	+ 2 fold & sig. in E2	E2 vs DMSO	2.30112656773756	0.0039509494360473	Intron (ENST00000375500.8/84569, intron 3 of 4)	11347	ENSG00000120563	LYZL1	lysozyme like 1
chr10	29464240	29465150	*	+ 2 fold & sig. in E2	E2 vs DMSO	1.6546962681614	0.0221488254339266	Intron (ENST00000684815.1/102724316, intron 2 of 2)	16505	ENSG00000197321	SVIL	supervillin
chr10	29622236	29623052	*	+ 2 fold & sig. in E2	E2 vs DMSO	1.84427421758774	4.36232062342621e-07	Intron (ENST00000355867.9/6840, intron 1 of 37)	11907	ENSG00000197321	SVIL	supervillin
chr10	29658914	29659620	*	+ 2 fold & sig. in E2	E2 vs DMSO	1.67188081890609	0.00363847542768361	Intron (ENST00000375400.7/6840, intron 2 of 35)	-11659	ENSG00000197321	SVIL	supervillin
chr10	29735579	29737300	*	+ 2 fold & sig. in E2	E2 vs DMSO	3.51537137396944	9.49931011105104e-12	Promoter	0	ENSG00000197321	SVIL	supervillin
chr10	29784217	29784867	*	+ 2 fold & sig. in E2	E2 vs DMSO	1.91948312094696	3.19499228120566e-05	Distal Intergenic	-47258	ENSG00000197321	SVIL	supervillin
chr10	29804084	29804723	*	+ 2 fold & sig. in E2	E2 vs DMSO	1.11636025050015	0.00235083032599304	Distal Intergenic	38540	NA	LOC107984172	uncharacterized LOC107984172
chr10	29808726	29809108	*	+ 2 fold & sig. in E2	E2 vs DMSO	3.27765814893189	3.26814663154426e-11	Distal Intergenic	34155	NA	LOC107984172	uncharacterized LOC107984172
chr10	29820944	29821527	*	+ 2 fold & sig. in E2	E2 vs DMSO	2.45044574024295	0.000146057455138795	Distal Intergenic	21736	NA	LOC107984172	uncharacterized LOC107984172
chr10	29957521	29958374	*	+ 2 fold & sig. in E2	E2 vs DMSO	2.82702718033419	5.54290060654025e-10	Distal Intergenic	10375	NA	NA	NA
chr10	30357293	30357880	*	+ 2 fold & sig. in E2	E2 vs DMSO	2.06038369178673	0.00103666111255964	Exon (ENST00000512082.1/ENST00000512082.1, exon 3 of 3)	-8015	ENSG00000107951	MTPAP	mitochondrial poly(A) polymerase
chr10	30364962	30365750	*	+ 2 fold & sig. in E2	E2 vs DMSO	2.24825690457032	4.07400911356564e-08	Exon (ENST00000488290.5/55149, exon 8 of 17)	2915	ENSG00000284277	MIR7162	microRNA 7162
chr10	30433177	30434787	*	+ 2 fold & sig. in E2	E2 vs DMSO	1.89676450271179	1.01069211272909e-07	Promoter	0	ENSG00000107968	MAP3K8	mitogen-activated protein kinase kinase kinase 8
chr10	30493976	30494627	*	+ 2 fold & sig. in E2	E2 vs DMSO	2.15234406677139	5.17058452582185e-05	Distal Intergenic	-34890	NA	LOC105376478	uncharacterized LOC105376478
chr10	30522523	30523167	*	+ 2 fold & sig. in E2	E2 vs DMSO	1.53088051191131	0.00671511257540605	Distal Intergenic	-6350	NA	LOC105376478	uncharacterized LOC105376478
chr10	30541966	30542750	*	+ 2 fold & sig. in E2	E2 vs DMSO	3.79689707814819	1.26604849517799e-13	Intron (ENST00000670247.1/105376478, intron 1 of 1)	12449	NA	LOC105376478	uncharacterized LOC105376478
chr10	30579072	30579730	*	+ 2 fold & sig. in E2	E2 vs DMSO	1.93159565832889	0.0130792829317425	Intron (ENST00000426067.1/ENST00000426067.1, intron 1 of 1)	-7976	NA	LOC105376479	uncharacterized LOC105376479
chr10	30611984	30612658	*	+ 2 fold & sig. in E2	E2 vs DMSO	2.29843620569389	0.0346124512388584	Exon (ENST00000647634.2/119180, exon 5 of 5)	17095	ENSG00000151033	LYZL2	lysozyme like 2
chr10	30695549	30696667	*	+ 2 fold & sig. in E2	E2 vs DMSO	1.63646496215871	1.19925843481733e-05	Exon (ENST00000422642.6/645954, exon 8 of 19)	1887	NA	SVIL2P	supervillin family member 2, pseudogene
chr10	30709873	30710698	*	+ 2 fold & sig. in E2	E2 vs DMSO	3.34065892080511	3.08693784086821e-07	Intron (ENST00000422642.6/645954, intron 15 of 18)	-12553	ENSG00000230720	LINC02644	long intergenic non-protein coding RNA 2644
chr10	3091494	3091878	*	+ 2 fold & sig. in E2	E2 vs DMSO	2.29673486118574	0.0287646842353046	Intron (ENST00000607886.5/5214, intron 2 of 3)	-12846	ENSG00000067057	PFKP	phosphofructokinase, platelet
chr10	32343975	32344340	*	+ 2 fold & sig. in E2	E2 vs DMSO	3.00177791498343	0.0211835928279977	Intron (ENST00000319778.11/80314, intron 1 of 13)	2479	ENSG00000120616	EPC1	enhancer of polycomb homolog 1
chr10	32650739	32652108	*	+ 2 fold & sig. in E2	E2 vs DMSO	1.83344185309668	0.000308953483317229	Intron (ENST00000639629.2/79741, intron 21 of 43)	-33911	ENSG00000216937	CCDC7	coiled-coil domain containing 7
chr10	33264066	33264941	*	+ 2 fold & sig. in E2	E2 vs DMSO	1.75548257783212	1.3632254499745e-06	Promoter	-362	ENSG00000099250	NRP1	neuropilin 1
chr10	33271832	33272423	*	+ 2 fold & sig. in E2	E2 vs DMSO	2.08453351861541	0.049203786359856	Intron (ENST00000374875.5/8829, intron 2 of 15)	-8128	ENSG00000099250	NRP1	neuropilin 1
chr10	33334740	33336511	*	+ 2 fold & sig. in E2	E2 vs DMSO	1.86343055811955	0.00083434388583744	Promoter	0	ENSG00000099250	NRP1	neuropilin 1
chr10	3395275	3396224	*	+ 2 fold & sig. in E2	E2 vs DMSO	1.54333026344022	0.000133064049425374	Distal Intergenic	-1281	NA	LOC105376357	uncharacterized LOC105376357
chr10	3502413	3503088	*	+ 2 fold & sig. in E2	E2 vs DMSO	1.52927006707505	0.0129987848964594	Promoter	0	ENSG00000233321	LINC02669	long intergenic non-protein coding RNA 2669
chr10	35394333	35395057	*	+ 2 fold & sig. in E2	E2 vs DMSO	1.35244513777808	0.00892762008907806	5' UTR	-39054	ENSG00000108100	CCNY	cyclin Y
chr10	3584759	3585757	*	+ 2 fold & sig. in E2	E2 vs DMSO	1.70264483816392	2.09830333431851e-05	Distal Intergenic	-81844	ENSG00000233321	LINC02669	long intergenic non-protein coding RNA 2669
chr10	361224	361834	*	+ 2 fold & sig. in E2	E2 vs DMSO	1.60283736198866	0.00992767446465475	Intron (ENST00000381496.7/22982, intron 21 of 35)	28182	ENSG00000151240	DIP2C	disco interacting protein 2 homolog C
chr10	3692286	3692871	*	+ 2 fold & sig. in E2	E2 vs DMSO	2.00927924578297	0.0308118402717116	Distal Intergenic	-56095	NA	LOC105376363	uncharacterized LOC105376363
chr10	3763007	3763568	*	+ 2 fold & sig. in E2	E2 vs DMSO	2.60740814568796	0.00891617409549782	Exon (ENST00000661014.1/105376363, exon 3 of 3)	-4347	NA	LOC105376363	uncharacterized LOC105376363
chr10	3809884	3810528	*	+ 2 fold & sig. in E2	E2 vs DMSO	1.70463645505067	0.0490946690503655	Exon (ENST00000668154.1/ENST00000668154.1, exon 1 of 4)	-23422	ENSG00000230573	LINC02639	long intergenic non-protein coding RNA 2639
chr10	4127698	4128469	*	+ 2 fold & sig. in E2	E2 vs DMSO	1.36577312214628	0.00225273839494941	Distal Intergenic	75972	ENSG00000236990	LOC101927964	uncharacterized LOC101927964
chr10	4279550	4281536	*	+ 2 fold & sig. in E2	E2 vs DMSO	1.98109642788184	7.24839384014575e-08	Distal Intergenic	-35638	NA	LINC00702	long intergenic non-protein coding RNA 702
chr10	42865896	42867129	*	+ 2 fold & sig. in E2	E2 vs DMSO	2.91651592912378	1.13698456904135e-07	Distal Intergenic	-4392	ENSG00000234944	LINC02623	long intergenic non-protein coding RNA 2623
chr10	42933530	42934576	*	+ 2 fold & sig. in E2	E2 vs DMSO	1.01377603730643	0.0304811483429275	Distal Intergenic	46931	ENSG00000229630	LINC01264	long intergenic non-protein coding RNA 1264
chr10	42981316	42982353	*	+ 2 fold & sig. in E2	E2 vs DMSO	1.97004260223584	0.00254843191037845	Promoter	0	ENSG00000229630	LINC01264	long intergenic non-protein coding RNA 1264
chr10	43026021	43027104	*	+ 2 fold & sig. in E2	E2 vs DMSO	4.2095729005569	1.45779128360317e-15	Distal Intergenic	28458	ENSG00000263795	MIR5100	microRNA 5100
chr10	43037890	43039054	*	+ 2 fold & sig. in E2	E2 vs DMSO	3.06144607456098	2.05146974455038e-07	Distal Intergenic	-38010	ENSG00000165731	RET	ret proto-oncogene
chr10	43044151	43045293	*	+ 2 fold & sig. in E2	E2 vs DMSO	1.74323458789205	3.28879192070528e-05	Distal Intergenic	-31771	ENSG00000165731	RET	ret proto-oncogene
chr10	43068486	43069679	*	+ 2 fold & sig. in E2	E2 vs DMSO	2.50361419062509	3.49804446725303e-06	Distal Intergenic	-7385	ENSG00000165731	RET	ret proto-oncogene
chr10	43076301	43077046	*	+ 2 fold & sig. in E2	E2 vs DMSO	4.33354704729335	3.74136563572851e-06	Promoter	-18	ENSG00000165731	RET	ret proto-oncogene
chr10	43081748	43082765	*	+ 2 fold & sig. in E2	E2 vs DMSO	2.53714386038248	4.89894141358369e-09	Intron (ENST00000671844.1/5979, intron 1 of 15)	4662	ENSG00000165731	RET	ret proto-oncogene
chr10	43086319	43086670	*	+ 2 fold & sig. in E2	E2 vs DMSO	3.12026765227584	3.51638350970446e-06	Intron (ENST00000671844.1/5979, intron 1 of 15)	9233	ENSG00000165731	RET	ret proto-oncogene
chr10	43110422	43111493	*	+ 2 fold & sig. in E2	E2 vs DMSO	3.82189768822969	5.28263568176591e-15	3' UTR	1215	ENSG00000165731	RET	ret proto-oncogene
chr10	43363503	43363999	*	+ 2 fold & sig. in E2	E2 vs DMSO	2.32697089711612	0.00762825517671439	Distal Intergenic	-7637	ENSG00000150201	FXYD4	FXYD domain containing ion transport regulator 4
chr10	44236417	44237317	*	+ 2 fold & sig. in E2	E2 vs DMSO	2.25738369253896	4.77599554658907e-08	Distal Intergenic	-55252	ENSG00000277288	LINC02881	long intergenic non-protein coding RNA 2881
chr10	44244773	44245814	*	+ 2 fold & sig. in E2	E2 vs DMSO	1.47039866769246	0.028666883671154	Distal Intergenic	-46755	ENSG00000277288	LINC02881	long intergenic non-protein coding RNA 2881
chr10	44258949	44259801	*	+ 2 fold & sig. in E2	E2 vs DMSO	1.10759770714079	0.0269828723349856	Exon (ENST00000437014.1/ENST00000437014.1, exon 2 of 2)	-32768	ENSG00000277288	LINC02881	long intergenic non-protein coding RNA 2881
chr10	44300847	44301817	*	+ 2 fold & sig. in E2	E2 vs DMSO	1.09112848986445	0.00336218341997055	Intron (ENST00000658643.1/124902544, intron 1 of 2)	8097	ENSG00000277288	LINC02881	long intergenic non-protein coding RNA 2881
chr10	44642040	44642443	*	+ 2 fold & sig. in E2	E2 vs DMSO	7.27691299640204	0.00309098549245102	Distal Intergenic	-39936	NA	NA	NA
chr10	44752693	44753707	*	+ 2 fold & sig. in E2	E2 vs DMSO	3.9512450647087	0.000215665416802984	Distal Intergenic	125931	ENSG00000224812	TMEM72-AS1	TMEM72 antisense RNA 1
chr10	4525066	4525566	*	+ 2 fold & sig. in E2	E2 vs DMSO	4.15445627145695	0.000131332994706683	Distal Intergenic	118564	ENSG00000224382	LINC00703	long intergenic non-protein coding RNA 703
chr10	45914518	45915090	*	+ 2 fold & sig. in E2	E2 vs DMSO	7.45140265448965	0.0010366892337551	Intron (ENST00000688192.1/728407, intron 6 of 11)	-22035	NA	PARGP1-AGAP4	PARGP1-AGAP4 readthrough
chr10	46023035	46023779	*	+ 2 fold & sig. in E2	E2 vs DMSO	2.87673445920788	2.50649472349959e-08	Promoter	0	ENSG00000266412	NCOA4	nuclear receptor coactivator 4
chr10	46047681	46048684	*	+ 2 fold & sig. in E2	E2 vs DMSO	1.62683039790684	0.000295353302050323	Promoter	0	ENSG00000263639	MSMB	microseminoprotein beta
chr10	47047364	47048277	*	+ 2 fold & sig. in E2	E2 vs DMSO	1.55683562055369	0.0139019502233637	Distal Intergenic	106782	ENSG00000204179	PTPN20	protein tyrosine phosphatase non-receptor type 20
chr10	47384055	47384857	*	+ 2 fold & sig. in E2	E2 vs DMSO	1.60902816088276	0.0361179082055827	Promoter	0	ENSG00000265763	ZNF488	zinc finger protein 488
chr10	47409959	47410350	*	+ 2 fold & sig. in E2	E2 vs DMSO	2.56020602018862	2.71397869847662e-07	Distal Intergenic	-25666	ENSG00000265763	ZNF488	zinc finger protein 488
chr10	47412911	47413153	*	+ 2 fold & sig. in E2	E2 vs DMSO	2.57867025446695	0.0106056492424148	Distal Intergenic	-28618	ENSG00000265763	ZNF488	zinc finger protein 488
chr10	4755340	4755877	*	+ 2 fold & sig. in E2	E2 vs DMSO	2.48136962867662	0.0188977892345439	Intron (ENST00000701197.1/105376375, intron 2 of 2)	10695	NA	LOC105376375	uncharacterized LOC105376375
chr10	48306042	48306935	*	+ 2 fold & sig. in E2	E2 vs DMSO	3.00363248651556	4.15339135328144e-07	Promoter	0	ENSG00000107643	MAPK8	mitogen-activated protein kinase 8
chr10	48309714	48310126	*	+ 2 fold & sig. in E2	E2 vs DMSO	4.48138133077136	1.89271062814426e-05	Intron (ENST00000395611.7/5599, intron 1 of 11)	1498	ENSG00000107643	MAPK8	mitogen-activated protein kinase 8
chr10	48813903	48814630	*	+ 2 fold & sig. in E2	E2 vs DMSO	2.27197705725708	1.64965694998454e-06	Exon (ENST00000325239.12/57705, exon 31 of 62)	11165	ENSG00000128815	WDFY4	WDFY family member 4
chr10	48814742	48815437	*	+ 2 fold & sig. in E2	E2 vs DMSO	1.28479644532158	0.0072590415488118	Intron (ENST00000325239.12/57705, intron 31 of 61)	12004	ENSG00000128815	WDFY4	WDFY family member 4
chr10	50172625	50173410	*	+ 2 fold & sig. in E2	E2 vs DMSO	7.59936369851014	0.000553426129216318	Distal Intergenic	25736	ENSG00000188611	ASAH2	N-acylsphingosine amidohydrolase 2
chr10	50473834	50474248	*	+ 2 fold & sig. in E2	E2 vs DMSO	7.03647602504675	0.00659305593142894	Exon (ENST00000437213.2/ENST00000437213.2, exon 2 of 2)	-6902	ENSG00000198964	SGMS1	sphingomyelin synthase 1
chr10	50768419	50769395	*	+ 2 fold & sig. in E2	E2 vs DMSO	4.23997193336781	4.48509870634474e-05	Intron (ENST00000483649.1/653308, intron 4 of 6)	28467	ENSG00000204147	ASAH2B	N-acylsphingosine amidohydrolase 2B
chr10	5115880	5116465	*	+ 2 fold & sig. in E2	E2 vs DMSO	1.86469122043032	0.00398484046652435	Distal Intergenic	10605	ENSG00000196139	AKR1C3	aldo-keto reductase family 1 member C3
chr10	517005	517783	*	+ 2 fold & sig. in E2	E2 vs DMSO	1.42020141719463	0.00102470738246389	Intron (ENST00000280886.12/22982, intron 1 of 36)	-30447	ENSG00000151240	DIP2C	disco interacting protein 2 homolog C
chr10	5446294	5446865	*	+ 2 fold & sig. in E2	E2 vs DMSO	1.27695887777171	0.0345635703115454	Promoter	0	ENSG00000173848	NET1	neuroepithelial cell transforming 1
chr10	5493614	5494367	*	+ 2 fold & sig. in E2	E2 vs DMSO	1.43938489582002	2.39905200032594e-05	Exon (ENST00000689579.2/ENST00000689579.2, exon 1 of 2)	5203	ENSG00000178372	CALML5	calmodulin like 5
chr10	5496366	5497242	*	+ 2 fold & sig. in E2	E2 vs DMSO	3.18269371648123	1.83428874755011e-13	Distal Intergenic	2328	ENSG00000178372	CALML5	calmodulin like 5
chr10	5509362	5509802	*	+ 2 fold & sig. in E2	E2 vs DMSO	1.71986862145658	0.039498206109241	Distal Intergenic	-9792	ENSG00000178372	CALML5	calmodulin like 5
chr10	5544366	5545382	*	+ 2 fold & sig. in E2	E2 vs DMSO	1.45527752620058	1.57053207232751e-05	Distal Intergenic	8895	ENSG00000287566	LOC105376380	uncharacterized LOC105376380
chr10	5547897	5548625	*	+ 2 fold & sig. in E2	E2 vs DMSO	1.40809741954695	8.18164347778898e-05	Distal Intergenic	5652	ENSG00000287566	LOC105376380	uncharacterized LOC105376380
chr10	5551277	5552032	*	+ 2 fold & sig. in E2	E2 vs DMSO	2.01261255120461	1.04103850127052e-06	Exon (ENST00000668112.1/105376380, exon 2 of 4)	2245	ENSG00000287566	LOC105376380	uncharacterized LOC105376380
chr10	5579432	5579961	*	+ 2 fold & sig. in E2	E2 vs DMSO	2.31825847868102	0.00488617747200705	Distal Intergenic	-12551	ENSG00000287235	LOC105376381	uncharacterized LOC105376381
chr10	5583372	5584102	*	+ 2 fold & sig. in E2	E2 vs DMSO	1.29265194052652	0.0027642087140596	Distal Intergenic	12016	ENSG00000242147	LASTR	lncRNA associated with SART3 regulation of splicing
chr10	5584961	5585479	*	+ 2 fold & sig. in E2	E2 vs DMSO	1.11382233261682	0.0284855987100447	Distal Intergenic	10639	ENSG00000242147	LASTR	lncRNA associated with SART3 regulation of splicing
chr10	5622680	5623780	*	+ 2 fold & sig. in E2	E2 vs DMSO	2.1997562881823	2.25610022547252e-08	Intron (ENST00000675199.1/105376382, intron 1 of 1)	-2713	ENSG00000242147	LINC02677	long intergenic non-protein coding RNA 2677
chr10	5632178	5632946	*	+ 2 fold & sig. in E2	E2 vs DMSO	3.27402535056191	2.2699048584026e-06	Promoter	0	ENSG00000242147	LINC02677	long intergenic non-protein coding RNA 2677
chr10	5645462	5645735	*	+ 2 fold & sig. in E2	E2 vs DMSO	2.95123244023638	0.0254813601122878	Intron (ENST00000357700.11/79754, intron 4 of 5)	-3650	ENSG00000196372	ASB13	ankyrin repeat and SOCS box containing 13
chr10	5665983	5667119	*	+ 2 fold & sig. in E2	E2 vs DMSO	2.87703412902015	5.26977952207531e-08	Promoter	0	ENSG00000196372	ASB13	ankyrin repeat and SOCS box containing 13
chr10	56664846	56665543	*	+ 2 fold & sig. in E2	E2 vs DMSO	2.60277750588592	0.00830863781884572	Distal Intergenic	-68815	NA	NA	NA
chr10	5684451	5685873	*	+ 2 fold & sig. in E2	E2 vs DMSO	2.99968214468202	8.73857754670262e-12	Promoter	0	ENSG00000108021	TASOR2	transcription activation suppressor family member 2
chr10	58300638	58301407	*	+ 2 fold & sig. in E2	E2 vs DMSO	2.11404934397007	0.00766273980176178	Distal Intergenic	25623	NA	LOC112268068	uncharacterized LOC112268068
chr10	58412292	58413047	*	+ 2 fold & sig. in E2	E2 vs DMSO	3.93981138914816	0.000399008192576609	Distal Intergenic	26688	ENSG00000108064	TFAM	transcription factor A, mitochondrial
chr10	5888746	5890284	*	+ 2 fold & sig. in E2	E2 vs DMSO	1.16130861584942	0.00938805958880122	Promoter	0	ENSG00000134461	ANKRD16	ankyrin repeat domain 16
chr10	59322902	59323752	*	+ 2 fold & sig. in E2	E2 vs DMSO	2.67143080541337	0.000105660151612848	Promoter	354	ENSG00000148541	FAM13C	family with sequence similarity 13 member C
chr10	60031404	60032001	*	+ 2 fold & sig. in E2	E2 vs DMSO	5.02039262507658	2.42890326803568e-07	Intron (ENST00000280772.7/288, intron 43 of 43)	12802	ENSG00000151150	ANK3	ankyrin 3
chr10	60410969	60411490	*	+ 2 fold & sig. in E2	E2 vs DMSO	6.94062495660373	0.0125777990332265	Intron (ENST00000503366.6/288, intron 1 of 43)	-21094	ENSG00000151150	ANK3	ankyrin 3
chr10	60942675	60943665	*	+ 2 fold & sig. in E2	E2 vs DMSO	2.44139418627266	0.000131846369958293	Intron (ENST00000337910.10/9886, intron 1 of 10)	520	ENSG00000072422	RHOBTB1	Rho related BTB domain containing 1
chr10	61158589	61158975	*	+ 2 fold & sig. in E2	E2 vs DMSO	6.29122076968816	0.0319510524867794	Intron (ENST00000687498.1/ENST00000687498.1, intron 1 of 1)	142314	ENSG00000227244	LINC00845	long intergenic non-protein coding RNA 845
chr10	61271149	61271982	*	+ 2 fold & sig. in E2	E2 vs DMSO	1.93909350227906	0.000210673080711657	Distal Intergenic	142518	ENSG00000196932	TMEM26	transmembrane protein 26
chr10	61409714	61410805	*	+ 2 fold & sig. in E2	E2 vs DMSO	3.47784666238033	1.0656245765757e-10	3' UTR	3695	ENSG00000196932	TMEM26	transmembrane protein 26
chr10	61917911	61918587	*	+ 2 fold & sig. in E2	E2 vs DMSO	1.81190526901848	0.0287646842353046	Intron (ENST00000644638.1/84159, intron 2 of 4)	16212	ENSG00000150347	ARID5B	AT-rich interaction domain 5B
chr10	6202513	6203412	*	+ 2 fold & sig. in E2	E2 vs DMSO	1.95742361389295	0.000453641285708946	Promoter	0	NA	NA	NA
chr10	6203576	6204722	*	+ 2 fold & sig. in E2	E2 vs DMSO	1.81788691226982	0.000156052112255541	Intron (ENST00000379789.8/5209, intron 1 of 14)	644	ENSG00000170525	PFKFB3	6-phosphofructo-2-kinase/fructose-2,6-biphosphatase 3
chr10	62048845	62049471	*	+ 2 fold & sig. in E2	E2 vs DMSO	1.80758042652267	0.00189715694521332	Promoter	0	ENSG00000150347	ARID5B	AT-rich interaction domain 5B
chr10	62089711	62090329	*	+ 2 fold & sig. in E2	E2 vs DMSO	3.20367824859036	0.0159091224589077	Intron (ENST00000279873.12/84159, intron 9 of 9)	40500	ENSG00000150347	ARID5B	AT-rich interaction domain 5B
chr10	62381560	62382313	*	+ 2 fold & sig. in E2	E2 vs DMSO	1.69108834911886	0.0001068517594602	Intron (ENST00000395255.7/22891, intron 2 of 4)	6016	ENSG00000138311	ZNF365	zinc finger protein 365
chr10	62842880	62843361	*	+ 2 fold & sig. in E2	E2 vs DMSO	3.26329776557548	0.000460848992031038	Intron (ENST00000493899.2/107984012, intron 6 of 7)	-23713	ENSG00000122877	EGR2	early growth response 2
chr10	63348188	63348871	*	+ 2 fold & sig. in E2	E2 vs DMSO	3.82411558900112	0.00096444608013367	Intron (ENST00000399262.7/221037, intron 2 of 25)	24177	ENSG00000221063	MIR1296	microRNA 1296
chr10	63492175	63492674	*	+ 2 fold & sig. in E2	E2 vs DMSO	2.21447471927574	0.039110307052518	Intron (ENST00000633035.1/221037, intron 1 of 3)	-26198	ENSG00000171988	JMJD1C	jumonji domain containing 1C
chr10	63646540	63647000	*	+ 2 fold & sig. in E2	E2 vs DMSO	2.40383549692328	0.00516467816421681	Intron (ENST00000654322.1/101929846, intron 1 of 2)	15868	NA	LOC101929846	uncharacterized LOC101929846
chr10	63700131	63700407	*	+ 2 fold & sig. in E2	E2 vs DMSO	6.29668391605512	0.0344730729127632	Intron (ENST00000444770.1/124902438, intron 2 of 2)	35467	NA	NA	NA
chr10	63707311	63707632	*	+ 2 fold & sig. in E2	E2 vs DMSO	3.41016968872168	3.61081497198195e-06	Intron (ENST00000444770.1/124902438, intron 2 of 2)	42647	NA	NA	NA
chr10	63720084	63720471	*	+ 2 fold & sig. in E2	E2 vs DMSO	3.13589615208253	0.0152990806563673	Intron (ENST00000444770.1/124902438, intron 2 of 2)	55420	NA	NA	NA
chr10	6401276	6402215	*	+ 2 fold & sig. in E2	E2 vs DMSO	1.16164052053815	0.0192122013897003	Distal Intergenic	50960	NA	LINC02656	long intergenic non-protein coding RNA 2656
chr10	67819764	67820378	*	+ 2 fold & sig. in E2	E2 vs DMSO	1.83593429015376	0.0004459541234794	Intron (ENST00000225171.7/56521, intron 2 of 4)	17681	ENSG00000108176	DNAJC12	DnaJ heat shock protein family (Hsp40) member C12
chr10	68155155	68155777	*	+ 2 fold & sig. in E2	E2 vs DMSO	3.51474084080277	5.71209286086688e-05	Exon (ENST00000692953.1/84665, exon 6 of 6)	-2340	ENSG00000138347	MYPN	myopalladin
chr10	69317721	69320188	*	+ 2 fold & sig. in E2	E2 vs DMSO	1.68953924469052	9.84814871051254e-05	Promoter	0	ENSG00000156515	HK1	hexokinase 1
chr10	69421767	69422421	*	+ 2 fold & sig. in E2	E2 vs DMSO	3.23555193039873	2.56541178822107e-08	Distal Intergenic	-4849	ENSG00000075073	TACR2	tachykinin receptor 2
chr10	69438493	69439947	*	+ 2 fold & sig. in E2	E2 vs DMSO	3.0668634904105	2.98375919911046e-12	Distal Intergenic	-11518	ENSG00000099282	TSPAN15	tetraspanin 15
chr10	69451207	69452095	*	+ 2 fold & sig. in E2	E2 vs DMSO	1.67412413958876	0.0254936380305374	Promoter	0	ENSG00000099282	TSPAN15	tetraspanin 15
chr10	70081136	70081838	*	+ 2 fold & sig. in E2	E2 vs DMSO	2.85426236549112	6.29285858532058e-06	Intron (ENST00000676699.1/55506, intron 2 of 7)	5536	ENSG00000099284	MACROH2A2	macroH2A.2 histone
chr10	70866476	70867553	*	+ 2 fold & sig. in E2	E2 vs DMSO	1.09076882001727	0.0133013821807884	Promoter	202	ENSG00000166224	SGPL1	sphingosine-1-phosphate lyase 1
chr10	70873537	70874473	*	+ 2 fold & sig. in E2	E2 vs DMSO	1.69491889495381	0.0135652318146955	3' UTR	7263	ENSG00000166224	SGPL1	sphingosine-1-phosphate lyase 1
chr10	71333811	71334843	*	+ 2 fold & sig. in E2	E2 vs DMSO	1.78718747939391	0.000215797381613293	Intron (ENST00000373189.6/55315, intron 2 of 5)	10987	ENSG00000198246	SLC29A3	solute carrier family 29 member 3
chr10	71339613	71340569	*	+ 2 fold & sig. in E2	E2 vs DMSO	1.09611973902779	0.000441985235700974	Intron (ENST00000373189.6/55315, intron 2 of 5)	7498	NA	LOC105378353	uncharacterized LOC105378353
chr10	71435598	71436399	*	+ 2 fold & sig. in E2	E2 vs DMSO	1.73467586812181	0.00812590216012779	Intron (ENST00000224721.12/64072, intron 1 of 69)	-3433	ENSG00000107736	CDH23	cadherin related 23
chr10	71512575	71513551	*	+ 2 fold & sig. in E2	E2 vs DMSO	2.84633032045403	2.06671486426213e-05	Promoter	462	ENSG00000107736	CDH23	cadherin related 23
chr10	71638022	71638825	*	+ 2 fold & sig. in E2	E2 vs DMSO	1.42764139892776	0.0083509034459377	Intron (ENST00000224721.12/64072, intron 11 of 69)	20737	ENSG00000107736	CDH23	cadherin related 23
chr10	71868098	71868866	*	+ 2 fold & sig. in E2	E2 vs DMSO	2.08458761722498	1.84251913946889e-05	Distal Intergenic	-9490	NA	NA	NA
chr10	72068871	72069522	*	+ 2 fold & sig. in E2	E2 vs DMSO	1.64288552157375	0.0341868224439475	Promoter	0	ENSG00000107742	SPOCK2	SPARC (osteonectin), cwcv and kazal like domains proteoglycan 2
chr10	73117889	73118578	*	+ 2 fold & sig. in E2	E2 vs DMSO	1.58140913365832	0.0234971158629116	Intron (ENST00000617744.4/25961, intron 2 of 7)	7359	ENSG00000166321	NUDT13	nudix hydrolase 13
chr10	73819208	73820186	*	+ 2 fold & sig. in E2	E2 vs DMSO	1.08493230463088	0.0147111218171125	3' UTR	-1426	ENSG00000148660	CAMK2G	calcium/calmodulin dependent protein kinase II gamma
chr10	74585530	74586369	*	+ 2 fold & sig. in E2	E2 vs DMSO	4.97096664354696	3.40304084493338e-07	Intron (ENST00000672429.1/132, intron 6 of 9)	-54977	NA	LOC102723439	uncharacterized LOC102723439
chr10	74655617	74656406	*	+ 2 fold & sig. in E2	E2 vs DMSO	1.86347517770667	0.00356070503489921	Exon (ENST00000398689.2/ENST00000398689.2, exon 1 of 1)	-125064	NA	LOC102723439	uncharacterized LOC102723439
chr10	74743198	74743948	*	+ 2 fold & sig. in E2	E2 vs DMSO	2.41939344723179	1.74521091876807e-06	Distal Intergenic	-80979	ENSG00000156650	KAT6B	lysine acetyltransferase 6B
chr10	74821742	74822075	*	+ 2 fold & sig. in E2	E2 vs DMSO	1.44737000372639	0.0286761749079344	Exon (ENST00000608199.1/ENST00000608199.1, exon 1 of 1)	-2852	ENSG00000156650	KAT6B	lysine acetyltransferase 6B
chr10	74899782	74900341	*	+ 2 fold & sig. in E2	E2 vs DMSO	3.18374783893516	0.000382790557016882	Intron (ENST00000648725.1/23522, intron 3 of 17)	56899	ENSG00000156650	KAT6B	lysine acetyltransferase 6B
chr10	74901227	74901793	*	+ 2 fold & sig. in E2	E2 vs DMSO	1.76479936124284	0.00137247473748732	Intron (ENST00000648725.1/23522, intron 3 of 17)	58344	ENSG00000156650	KAT6B	lysine acetyltransferase 6B
chr10	75062367	75063117	*	+ 2 fold & sig. in E2	E2 vs DMSO	2.09727191784712	0.0210705705336118	Intron (ENST00000338487.6/338599, intron 1 of 3)	10525	ENSG00000188716	DUSP29	dual specificity phosphatase 29
chr10	75234226	75236206	*	+ 2 fold & sig. in E2	E2 vs DMSO	1.88842697822045	7.34313620076626e-05	Promoter	0	ENSG00000165644	COMTD1	catechol-O-methyltransferase domain containing 1
chr10	7696551	7696981	*	+ 2 fold & sig. in E2	E2 vs DMSO	2.27689050639421	0.00156649258851615	Distal Intergenic	-6335	ENSG00000151655	ITIH2	inter-alpha-trypsin inhibitor heavy chain 2
chr10	76973740	76974415	*	+ 2 fold & sig. in E2	E2 vs DMSO	2.04423908201549	0.00366412668121521	Promoter	-538	ENSG00000156113	KCNMA1	potassium calcium-activated channel subfamily M alpha 1
chr10	77163785	77164521	*	+ 2 fold & sig. in E2	E2 vs DMSO	2.89328568609584	5.81490318183258e-08	Intron (ENST00000604624.6/3778, intron 4 of 27)	15493	ENSG00000225497	KCNMA1-AS2	KCNMA1 antisense RNA 2
chr10	77417307	77417715	*	+ 2 fold & sig. in E2	E2 vs DMSO	6.87141612737762	0.00909914838718459	Intron (ENST00000639601.1/3778, intron 1 of 27)	-13282	ENSG00000156113	KCNMA1	potassium calcium-activated channel subfamily M alpha 1
chr10	77479610	77480584	*	+ 2 fold & sig. in E2	E2 vs DMSO	1.14020240946938	0.0119915291913918	Intron (ENST00000639601.1/3778, intron 1 of 27)	18386	ENSG00000156113	KCNMA1	potassium calcium-activated channel subfamily M alpha 1
chr10	77826024	77826602	*	+ 2 fold & sig. in E2	E2 vs DMSO	2.39291579691888	0.0012830908010692	Intron (ENST00000424842.5/9231, intron 2 of 19)	-1294	ENSG00000151208	DLG5	discs large MAGUK scaffold protein 5
chr10	77857029	77857972	*	+ 2 fold & sig. in E2	E2 vs DMSO	1.74388218956174	6.63621228230905e-08	Intron (ENST00000475613.6/9231, intron 1 of 21)	11219	ENSG00000151208	DLG5	discs large MAGUK scaffold protein 5
chr10	77859374	77859826	*	+ 2 fold & sig. in E2	E2 vs DMSO	1.93579962684383	0.0011516090807811	Intron (ENST00000475613.6/9231, intron 1 of 21)	9365	ENSG00000151208	DLG5	discs large MAGUK scaffold protein 5
chr10	778598	779419	*	+ 2 fold & sig. in E2	E2 vs DMSO	2.14347591926306	4.08096855410016e-08	Distal Intergenic	36296	ENSG00000107929	LARP4B	La ribonucleoprotein 4B
chr10	77865517	77866366	*	+ 2 fold & sig. in E2	E2 vs DMSO	2.61068982159912	2.83985078583781e-11	Intron (ENST00000475613.6/9231, intron 1 of 21)	2825	ENSG00000151208	DLG5	discs large MAGUK scaffold protein 5
chr10	77869889	77870452	*	+ 2 fold & sig. in E2	E2 vs DMSO	4.5316751992708	1.33996136216284e-14	Promoter	-698	ENSG00000151208	DLG5	discs large MAGUK scaffold protein 5
chr10	77873349	77873646	*	+ 2 fold & sig. in E2	E2 vs DMSO	2.87063124434201	7.11612793355106e-08	Intron (ENST00000372391.7/9231, intron 1 of 31)	-4158	ENSG00000151208	DLG5	discs large MAGUK scaffold protein 5
chr10	77877741	77878562	*	+ 2 fold & sig. in E2	E2 vs DMSO	2.11501331810321	1.62146842279581e-06	Intron (ENST00000372391.7/9231, intron 1 of 31)	-8550	ENSG00000151208	DLG5	discs large MAGUK scaffold protein 5
chr10	77889229	77890301	*	+ 2 fold & sig. in E2	E2 vs DMSO	2.11217760567187	9.94487893861313e-10	Promoter	0	ENSG00000151208	DLG5	discs large MAGUK scaffold protein 5
chr10	77906815	77907341	*	+ 2 fold & sig. in E2	E2 vs DMSO	1.61932388390639	0.0337270177464116	Intron (ENST00000372391.7/9231, intron 1 of 31)	-17308	ENSG00000151208	DLG5	discs large MAGUK scaffold protein 5
chr10	77972163	77972786	*	+ 2 fold & sig. in E2	E2 vs DMSO	2.88842099739566	7.14330548215515e-07	Intron (ENST00000698724.1/11128, intron 9 of 10)	9048	ENSG00000148606	POLR3A	RNA polymerase III subunit A
chr10	78185469	78186071	*	+ 2 fold & sig. in E2	E2 vs DMSO	8.6734275605325	5.37993750183218e-06	Intron (ENST00000634930.1/105378375, intron 1 of 3)	6264	NA	LOC105378375	uncharacterized LOC105378375
chr10	78256025	78256675	*	+ 2 fold & sig. in E2	E2 vs DMSO	2.54077454062491	4.60101321520981e-06	Intron (ENST00000634930.1/105378375, intron 1 of 3)	7188	ENSG00000230417	LINC00856	long intergenic non-protein coding RNA 856
chr10	78301796	78302458	*	+ 2 fold & sig. in E2	E2 vs DMSO	1.7936538618096	0.000908753663307154	Promoter	137	NA	NA	NA
chr10	78302925	78303842	*	+ 2 fold & sig. in E2	E2 vs DMSO	1.86551414473518	4.433501519727e-05	Intron (ENST00000634930.1/105378375, intron 1 of 3)	1266	NA	NA	NA
chr10	7868019	7868710	*	+ 2 fold & sig. in E2	E2 vs DMSO	5.00122852769729	1.36616552770652e-15	Intron (ENST00000687671.1/83860, intron 2 of 3)	49491	ENSG00000165632	TAF3	TATA-box binding protein associated factor 3
chr10	78754361	78754659	*	+ 2 fold & sig. in E2	E2 vs DMSO	7.09538040367866	0.00532513750003175	Distal Intergenic	207735	ENSG00000224596	ZMIZ1-AS1	ZMIZ1 antisense RNA 1
chr10	78843220	78843935	*	+ 2 fold & sig. in E2	E2 vs DMSO	4.09464145331916	0.000152563431634339	Distal Intergenic	118459	ENSG00000224596	ZMIZ1-AS1	ZMIZ1 antisense RNA 1
chr10	78927103	78927794	*	+ 2 fold & sig. in E2	E2 vs DMSO	1.67540907525661	0.0359026481475782	Distal Intergenic	34600	ENSG00000224596	ZMIZ1-AS1	ZMIZ1 antisense RNA 1
chr10	78962916	78963265	*	+ 2 fold & sig. in E2	E2 vs DMSO	2.85693660144234	0.0345574168182564	Promoter	-522	ENSG00000224596	ZMIZ1-AS1	ZMIZ1 antisense RNA 1
chr10	78973188	78973961	*	+ 2 fold & sig. in E2	E2 vs DMSO	2.90936260140846	2.71826034619092e-05	Intron (ENST00000456353.5/283050, intron 5 of 9)	-10794	ENSG00000224596	ZMIZ1-AS1	ZMIZ1 antisense RNA 1
chr10	78977410	78978432	*	+ 2 fold & sig. in E2	E2 vs DMSO	4.49842542817742	8.33661855458225e-15	Intron (ENST00000456353.5/283050, intron 5 of 9)	-15016	ENSG00000224596	ZMIZ1-AS1	ZMIZ1 antisense RNA 1
chr10	79046464	79047396	*	+ 2 fold & sig. in E2	E2 vs DMSO	3.89052301497419	6.6141208336912e-09	Intron (ENST00000456353.5/283050, intron 5 of 9)	20024	ENSG00000224596	ZMIZ1-AS1	ZMIZ1 antisense RNA 1
chr10	79067173	79067510	*	+ 2 fold & sig. in E2	E2 vs DMSO	3.51217012832158	0.00344565629257392	Promoter	0	ENSG00000224596	ZMIZ1-AS1	ZMIZ1 antisense RNA 1
chr10	79093612	79094577	*	+ 2 fold & sig. in E2	E2 vs DMSO	3.05076316056971	3.14188321750508e-11	Intron (ENST00000334512.10/57178, intron 1 of 24)	24646	ENSG00000108175	ZMIZ1	zinc finger MIZ-type containing 1
chr10	79127004	79127860	*	+ 2 fold & sig. in E2	E2 vs DMSO	1.31472508935011	0.00196788525554364	Intron (ENST00000334512.10/57178, intron 2 of 24)	58038	ENSG00000108175	ZMIZ1	zinc finger MIZ-type containing 1
chr10	79128313	79129273	*	+ 2 fold & sig. in E2	E2 vs DMSO	2.79357964002387	6.0450618805599e-11	Intron (ENST00000334512.10/57178, intron 2 of 24)	59347	ENSG00000108175	ZMIZ1	zinc finger MIZ-type containing 1
chr10	79148728	79149289	*	+ 2 fold & sig. in E2	E2 vs DMSO	1.94389108528541	0.00562720173864139	Intron (ENST00000334512.10/57178, intron 3 of 24)	79762	ENSG00000108175	ZMIZ1	zinc finger MIZ-type containing 1
chr10	79149820	79150602	*	+ 2 fold & sig. in E2	E2 vs DMSO	1.63050351148207	0.000190647228962916	Intron (ENST00000334512.10/57178, intron 3 of 24)	80854	ENSG00000108175	ZMIZ1	zinc finger MIZ-type containing 1
chr10	79157367	79159279	*	+ 2 fold & sig. in E2	E2 vs DMSO	2.16424741292006	3.35023052761505e-09	Intron (ENST00000334512.10/57178, intron 3 of 24)	-84390	ENSG00000108175	ZMIZ1	zinc finger MIZ-type containing 1
chr10	79239216	79240552	*	+ 2 fold & sig. in E2	E2 vs DMSO	2.35051907751905	3.97263425773026e-09	Intron (ENST00000334512.10/57178, intron 7 of 24)	-3117	ENSG00000108175	ZMIZ1	zinc finger MIZ-type containing 1
chr10	79254224	79254905	*	+ 2 fold & sig. in E2	E2 vs DMSO	2.34366693980616	9.80936382416523e-05	Intron (ENST00000334512.10/57178, intron 7 of 24)	10555	ENSG00000108175	ZMIZ1	zinc finger MIZ-type containing 1
chr10	79263895	79265539	*	+ 2 fold & sig. in E2	E2 vs DMSO	1.19118832110198	0.0001588645872074	Intron (ENST00000334512.10/57178, intron 7 of 24)	-11640	ENSG00000108175	ZMIZ1	zinc finger MIZ-type containing 1
chr10	79342169	79343532	*	+ 2 fold & sig. in E2	E2 vs DMSO	3.08137014369138	1.74594916869941e-12	Distal Intergenic	-3937	ENSG00000108179	PPIF	peptidylprolyl isomerase F
chr10	79345917	79346415	*	+ 2 fold & sig. in E2	E2 vs DMSO	2.17823186324743	2.25904585494259e-06	Distal Intergenic	-1054	ENSG00000108179	PPIF	peptidylprolyl isomerase F
chr10	79347200	79347612	*	+ 2 fold & sig. in E2	E2 vs DMSO	2.02973946659434	0.00488617747200705	Promoter	0	ENSG00000108179	PPIF	peptidylprolyl isomerase F
chr10	79355603	79355927	*	+ 2 fold & sig. in E2	E2 vs DMSO	3.22320598452546	1.46303769072142e-07	Downstream (<=300bp)	7945	ENSG00000108179	PPIF	peptidylprolyl isomerase F
chr10	7945088	7946327	*	+ 2 fold & sig. in E2	E2 vs DMSO	2.12770703988031	2.1531278441062e-08	Intron (ENST00000687671.1/83860, intron 2 of 3)	-99051	ENSG00000107485	GATA3	GATA binding protein 3
chr10	79507948	79508795	*	+ 2 fold & sig. in E2	E2 vs DMSO	1.96644601975977	0.0300764694072199	Exon (ENST00000648988.1/729815, exon 3 of 3)	1765	ENSG00000235705	LOC729815	uncharacterized LOC729815
chr10	7966981	7967451	*	+ 2 fold & sig. in E2	E2 vs DMSO	2.39418364715225	0.00596361135910883	Intron (ENST00000687671.1/83860, intron 3 of 3)	-77927	ENSG00000107485	GATA3	GATA binding protein 3
chr10	79933941	79934793	*	+ 2 fold & sig. in E2	E2 vs DMSO	1.56542298435122	0.0123708821196675	Intron (ENST00000453174.7/100288974, intron 6 of 7)	9915	ENSG00000133661	SFTPD	surfactant protein D
chr10	80013406	80014099	*	+ 2 fold & sig. in E2	E2 vs DMSO	2.80531090884058	0.00443067866453439	Distal Intergenic	-30792	ENSG00000133661	SFTPD	surfactant protein D
chr10	80014455	80014999	*	+ 2 fold & sig. in E2	E2 vs DMSO	2.49352249569215	0.0197819345458636	Distal Intergenic	-31841	ENSG00000133661	SFTPD	surfactant protein D
chr10	80110009	80110634	*	+ 2 fold & sig. in E2	E2 vs DMSO	3.49389988198525	0.00350703378834814	Distal Intergenic	-21048	ENSG00000189129	PLAC9	placenta associated 9
chr10	80163617	80164184	*	+ 2 fold & sig. in E2	E2 vs DMSO	1.43329093579424	0.0367376509109147	Exon (ENST00000422982.8/311, exon 9 of 16)	-1605	ENSG00000122359	ANXA11	annexin A11
chr10	80205377	80206161	*	+ 2 fold & sig. in E2	E2 vs DMSO	2.70709636979363	3.26927781489794e-07	Promoter	0	ENSG00000122359	ANXA11	annexin A11
chr10	80251526	80252220	*	+ 2 fold & sig. in E2	E2 vs DMSO	2.17413889488761	0.00921948695308885	Exon (ENST00000623657.1/ENST00000623657.1, exon 1 of 1)	17862	NA	NA	NA
chr10	80290669	80291488	*	+ 2 fold & sig. in E2	E2 vs DMSO	2.89690105500993	0.0282369734102981	Distal Intergenic	-1011	ENSG00000151224	MAT1A	methionine adenosyltransferase 1A
chr10	80429343	80430170	*	+ 2 fold & sig. in E2	E2 vs DMSO	2.33706585258749	1.46565954557063e-05	Intron (ENST00000372188.5/84293, intron 5 of 5)	9345	ENSG00000122378	PRXL2A	peroxiredoxin like 2A
chr10	8050784	8051466	*	+ 2 fold & sig. in E2	E2 vs DMSO	1.30600648784495	0.00376627104927667	Promoter	-75	ENSG00000107485	GATA3	GATA binding protein 3
chr10	8053347	8054085	*	+ 2 fold & sig. in E2	E2 vs DMSO	1.66050613608604	1.41177285446215e-05	Promoter	0	ENSG00000107485	GATA3	GATA binding protein 3
chr10	8163829	8164312	*	+ 2 fold & sig. in E2	E2 vs DMSO	1.9515976015781	0.00614752641114702	Distal Intergenic	17341	NA	LOC107984206	uncharacterized LOC107984206
chr10	81898158	81898852	*	+ 2 fold & sig. in E2	E2 vs DMSO	4.49135447364058	8.18669964533826e-06	Intron (ENST00000372141.7/10718, intron 1 of 8)	20197	ENSG00000185737	NRG3	neuregulin 3
chr10	84632707	84633538	*	+ 2 fold & sig. in E2	E2 vs DMSO	2.94809855166514	8.32890246523794e-06	Distal Intergenic	180490	ENSG00000107771	CCSER2	coiled-coil serine rich protein 2
chr10	8581658	8582289	*	+ 2 fold & sig. in E2	E2 vs DMSO	1.73264412220396	0.00176133001192098	Distal Intergenic	180798	NA	LOC105376396	uncharacterized LOC105376396
chr10	8671410	8671872	*	+ 2 fold & sig. in E2	E2 vs DMSO	1.8374998273495	0.000194804334987703	Distal Intergenic	-226117	ENSG00000234752	LINC02676	long intergenic non-protein coding RNA 2676
chr10	86715358	86716261	*	+ 2 fold & sig. in E2	E2 vs DMSO	1.56954190949623	0.00338722408446233	Intron (ENST00000688001.1/11155, intron 8 of 12)	-2469	ENSG00000122367	LDB3	LIM domain binding 3
chr10	87008076	87009273	*	+ 2 fold & sig. in E2	E2 vs DMSO	2.030600803511	0.0008882355027156	Exon (ENST00000433214.2/119385, exon 12 of 12)	6440	ENSG00000271880	AGAP11	ArfGAP with GTPase domain, ankyrin repeat and PH domain 11
chr10	87095085	87095838	*	+ 2 fold & sig. in E2	E2 vs DMSO	2.33848282857413	7.66215019090988e-06	Promoter	0	ENSG00000122376	SHLD2	shieldin complex subunit 2
chr10	8752133	8753133	*	+ 2 fold & sig. in E2	E2 vs DMSO	2.70863376161199	1.13688887944166e-10	Distal Intergenic	-144856	ENSG00000234752	LINC02676	long intergenic non-protein coding RNA 2676
chr10	87589460	87590091	*	+ 2 fold & sig. in E2	E2 vs DMSO	2.00893272593767	0.0279591429299052	Distal Intergenic	68345	ENSG00000107789	MINPP1	multiple inositol-polyphosphate phosphatase 1
chr10	87657312	87657798	*	+ 2 fold & sig. in E2	E2 vs DMSO	4.66054106483451	1.03795993148692e-08	Intron (ENST00000438082.1/ENST00000438082.1, intron 2 of 3)	-1815	ENSG00000198682	PAPSS2	3'-phosphoadenosine 5'-phosphosulfate synthase 2
chr10	87659374	87659888	*	+ 2 fold & sig. in E2	E2 vs DMSO	4.02746292617276	0.00059612527973159	Promoter	0	ENSG00000198682	PAPSS2	3'-phosphoadenosine 5'-phosphosulfate synthase 2
chr10	87693726	87694599	*	+ 2 fold & sig. in E2	E2 vs DMSO	1.04117300836852	0.0163334629208102	Intron (ENST00000361175.8/9060, intron 1 of 11)	32742	ENSG00000198682	PAPSS2	3'-phosphoadenosine 5'-phosphosulfate synthase 2
chr10	87701496	87701879	*	+ 2 fold & sig. in E2	E2 vs DMSO	2.57093200875063	0.00938542112148614	Intron (ENST00000361175.8/9060, intron 1 of 11)	40512	ENSG00000198682	PAPSS2	3'-phosphoadenosine 5'-phosphosulfate synthase 2
chr10	87705212	87706048	*	+ 2 fold & sig. in E2	E2 vs DMSO	1.8344616389679	5.31945386263616e-05	Intron (ENST00000361175.8/9060, intron 1 of 11)	44228	ENSG00000198682	PAPSS2	3'-phosphoadenosine 5'-phosphosulfate synthase 2
chr10	8789995	8790886	*	+ 2 fold & sig. in E2	E2 vs DMSO	1.01181569877368	0.0182981577837765	Distal Intergenic	-107103	ENSG00000234752	LINC02676	long intergenic non-protein coding RNA 2676
chr10	88134	88791	*	+ 2 fold & sig. in E2	E2 vs DMSO	2.51166849497463	2.35316330474494e-06	Distal Intergenic	-13971	ENSG00000261456	TUBB8	tubulin beta 8 class VIII
chr10	88178672	88179269	*	+ 2 fold & sig. in E2	E2 vs DMSO	1.70173126576574	0.0420237437381463	Distal Intergenic	-183977	NA	NA	NA
chr10	8830776	8831342	*	+ 2 fold & sig. in E2	E2 vs DMSO	1.93498404991521	0.0372204102276607	Distal Intergenic	-66647	ENSG00000234752	LINC02676	long intergenic non-protein coding RNA 2676
chr10	88385365	88386282	*	+ 2 fold & sig. in E2	E2 vs DMSO	2.58069252704638	1.13136042763383e-06	Intron (ENST00000371947.7/55328, intron 4 of 6)	196908	ENSG00000184719	RNLS	renalase, FAD dependent amine oxidase
chr10	8871318	8871813	*	+ 2 fold & sig. in E2	E2 vs DMSO	1.30291650192881	0.00803486415530176	Distal Intergenic	-26176	ENSG00000234752	LINC02676	long intergenic non-protein coding RNA 2676
chr10	8873931	8874334	*	+ 2 fold & sig. in E2	E2 vs DMSO	1.85333060540359	0.00572293830220705	Distal Intergenic	-23655	ENSG00000234752	LINC02676	long intergenic non-protein coding RNA 2676
chr10	90106	90640	*	+ 2 fold & sig. in E2	E2 vs DMSO	2.89313365239842	9.43453626459537e-05	Distal Intergenic	-15943	ENSG00000261456	TUBB8	tubulin beta 8 class VIII
chr10	9037783	9038794	*	+ 2 fold & sig. in E2	E2 vs DMSO	2.33383785219097	7.18341944439584e-09	Distal Intergenic	139794	ENSG00000234752	LINC02676	long intergenic non-protein coding RNA 2676
chr10	91681767	91682341	*	+ 2 fold & sig. in E2	E2 vs DMSO	2.2431121023364	0.0421225136190523	Distal Intergenic	-48696	ENSG00000119938	PPP1R3C	protein phosphatase 1 regulatory subunit 3C
chr10	91931630	91932181	*	+ 2 fold & sig. in E2	E2 vs DMSO	2.24815408952995	0.0403890749850548	Intron (ENST00000265990.12/9044, intron 1 of 37)	7860	ENSG00000095564	BTAF1	B-TFIID TATA-box binding protein associated factor 1
chr10	9301914	9302759	*	+ 2 fold & sig. in E2	E2 vs DMSO	2.35806821500981	0.0203355908717782	Intron (ENST00000658214.1/101928272, intron 2 of 3)	6877	NA	LOC101928272	uncharacterized LOC101928272
chr10	93445306	93446085	*	+ 2 fold & sig. in E2	E2 vs DMSO	1.28801241062105	2.58969466250639e-05	Intron (ENST00000359263.9/26509, intron 3 of 53)	36109	ENSG00000138119	MYOF	myoferlin
chr10	93458600	93459294	*	+ 2 fold & sig. in E2	E2 vs DMSO	1.01573923331452	0.0220305667254298	Intron (ENST00000359263.9/26509, intron 1 of 53)	22900	ENSG00000138119	MYOF	myoferlin
chr10	93570881	93571586	*	+ 2 fold & sig. in E2	E2 vs DMSO	3.31237488802831	1.17011331079678e-08	Intron (ENST00000371481.9/338557, intron 1 of 2)	4199	ENSG00000186188	FFAR4	free fatty acid receptor 4
chr10	93741108	93741941	*	+ 2 fold & sig. in E2	E2 vs DMSO	1.82452319387103	0.00412225053815939	Distal Intergenic	-15899	ENSG00000108231	LGI1	leucine rich glioma inactivated 1
chr10	95716670	95717246	*	+ 2 fold & sig. in E2	E2 vs DMSO	3.04618759300795	0.0194871102260006	Intron (ENST00000453258.6/953, intron 1 of 9)	4891	ENSG00000138185	ENTPD1	ectonucleoside triphosphate diphosphohydrolase 1
chr10	970003	971034	*	+ 2 fold & sig. in E2	E2 vs DMSO	1.12340872652667	0.00259565082891698	Distal Intergenic	17307	ENSG00000107929	LARP4B	La ribonucleoprotein 4B
chr10	97408468	97409181	*	+ 2 fold & sig. in E2	E2 vs DMSO	1.66413443312485	0.000197245511906689	Intron (ENST00000422848.1/ENST00000422848.1, intron 1 of 1)	-6934	ENSG00000052749	RRP12	ribosomal RNA processing 12 homolog
chr10	97498192	97499119	*	+ 2 fold & sig. in E2	E2 vs DMSO	1.58817898962702	0.000295221064061408	Promoter	0	ENSG00000155229	MMS19	MMS19 homolog, cytosolic iron-sulfur assembly component
chr10	97566351	97566885	*	+ 2 fold & sig. in E2	E2 vs DMSO	1.72779726512069	0.00104386980712217	Intron (ENST00000370664.4/80019, intron 1 of 2)	-5614	ENSG00000165887	ANKRD2	ankyrin repeat domain 2
chr10	97580215	97580875	*	+ 2 fold & sig. in E2	E2 vs DMSO	3.0164761627594	1.13142808474845e-06	Exon (ENST00000298808.9/26287, exon 5 of 8)	-3448	ENSG00000241935	HOGA1	4-hydroxy-2-oxoglutarate aldolase 1
chr10	98269046	98269906	*	+ 2 fold & sig. in E2	E2 vs DMSO	2.55495443134323	2.76667061572235e-05	Promoter	-852	ENSG00000138131	LOXL4	lysyl oxidase like 4
chr10	98396021	98396555	*	+ 2 fold & sig. in E2	E2 vs DMSO	2.08863539991875	0.00262443695150186	Promoter	-714	ENSG00000284415	MIR1287	microRNA 1287
chr10	98481766	98482157	*	+ 2 fold & sig. in E2	E2 vs DMSO	6.45938246534776	0.0262769763437695	Intron (ENST00000404542.5/60495, intron 8 of 8)	-34803	ENSG00000107521	HPS1	HPS1 biogenesis of lysosomal organelles complex 3 subunit 1
chr10	99966224	99966840	*	+ 2 fold & sig. in E2	E2 vs DMSO	1.70072656268911	0.0280014380708327	Intron (ENST00000324109.9/23268, intron 3 of 16)	-35228	ENSG00000107554	DNMBP	dynamin binding protein
chr11	10050406	10050960	*	+ 2 fold & sig. in E2	E2 vs DMSO	1.29299239302912	0.0112938618333262	Intron (ENST00000692716.1/81846, intron 2 of 38)	-5791	ENSG00000133812	SBF2	SET binding factor 2
chr11	100632800	100633474	*	+ 2 fold & sig. in E2	E2 vs DMSO	4.51639000606937	1.00003659206519e-05	Distal Intergenic	-53814	ENSG00000165895	ARHGAP42	Rho GTPase activating protein 42
chr11	100692210	100692887	*	+ 2 fold & sig. in E2	E2 vs DMSO	2.34833369336864	3.06475154336644e-05	Intron (ENST00000298815.13/143872, intron 1 of 23)	-4255	ENSG00000248027	ARHGAP42-AS1	ARHGAP42 antisense RNA 1
chr11	100776220	100777549	*	+ 2 fold & sig. in E2	E2 vs DMSO	1.85480525167612	2.9781020901469e-05	Intron (ENST00000298815.13/143872, intron 2 of 23)	5854	ENSG00000165895	ARHGAP42	Rho GTPase activating protein 42
chr11	100840970	100841415	*	+ 2 fold & sig. in E2	E2 vs DMSO	6.20063352099098	0.0445445247728897	Intron (ENST00000298815.13/143872, intron 3 of 23)	1566	ENSG00000165895	ARHGAP42	Rho GTPase activating protein 42
chr11	100980570	100981665	*	+ 2 fold & sig. in E2	E2 vs DMSO	3.19044913508967	2.53448163004921e-09	Intron (ENST00000298815.13/143872, intron 22 of 23)	20720	ENSG00000165895	ARHGAP42	Rho GTPase activating protein 42
chr11	100999620	101000317	*	+ 2 fold & sig. in E2	E2 vs DMSO	3.57449155666138	1.98455388236531e-10	Distal Intergenic	39770	ENSG00000165895	ARHGAP42	Rho GTPase activating protein 42
chr11	101009775	101010266	*	+ 2 fold & sig. in E2	E2 vs DMSO	6.86378683443007	0.0095743786289286	Distal Intergenic	41204	ENSG00000082175	PGR	progesterone receptor
chr11	101063654	101064721	*	+ 2 fold & sig. in E2	E2 vs DMSO	2.12535191343379	0.00634006082735358	Promoter	0	ENSG00000082175	PGR	progesterone receptor
chr11	101079812	101080024	*	+ 2 fold & sig. in E2	E2 vs DMSO	1.70456212903069	0.0417202270926757	Intron (ENST00000325455.10/5241, intron 3 of 7)	-15787	ENSG00000082175	PGR	progesterone receptor
chr11	101127102	101129908	*	+ 2 fold & sig. in E2	E2 vs DMSO	2.65705243693021	1.80001419197212e-09	Promoter	0	NA	PGR-AS1	PGR antisense RNA 1
chr11	101178300	101179023	*	+ 2 fold & sig. in E2	E2 vs DMSO	3.84194595140089	8.05313782408833e-06	Intron (ENST00000632820.1/101054525, intron 5 of 6)	30150	NA	PGR-AS1	PGR antisense RNA 1
chr11	101342315	101342742	*	+ 2 fold & sig. in E2	E2 vs DMSO	3.83120698332507	0.000911607246985197	Distal Intergenic	112835	ENSG00000137672	TRPC6	transient receptor potential cation channel subfamily C member 6
chr11	101436419	101436922	*	+ 2 fold & sig. in E2	E2 vs DMSO	5.98062879347157	9.85236627367508e-11	Distal Intergenic	18655	ENSG00000137672	TRPC6	transient receptor potential cation channel subfamily C member 6
chr11	101674473	101675070	*	+ 2 fold & sig. in E2	E2 vs DMSO	2.34617727308295	0.00722525724668144	Intron (ENST00000526713.1/7225, intron 1 of 1)	-90466	ENSG00000137672	TRPC6	transient receptor potential cation channel subfamily C member 6
chr11	101686517	101687201	*	+ 2 fold & sig. in E2	E2 vs DMSO	2.04231623015921	7.00544608782596e-05	Intron (ENST00000526713.1/7225, intron 1 of 1)	-102510	ENSG00000137672	TRPC6	transient receptor potential cation channel subfamily C member 6
chr11	103091569	103092722	*	+ 2 fold & sig. in E2	E2 vs DMSO	1.25724054033497	0.0110100752352645	Promoter	0	ENSG00000137692	DCUN1D5	defective in cullin neddylation 1 domain containing 5
chr11	1071714	1072779	*	+ 2 fold & sig. in E2	E2 vs DMSO	1.25494797679807	7.8489115439185e-05	Distal Intergenic	-2096	ENSG00000198788	MUC2	mucin 2, oligomeric mucus/gel-forming
chr11	10742435	10743812	*	+ 2 fold & sig. in E2	E2 vs DMSO	1.46245796672458	0.000231664754380718	Distal Intergenic	-7434	ENSG00000198730	CTR9	CTR9 homolog, Paf1/RNA polymerase II complex component
chr11	108667009	108667790	*	+ 2 fold & sig. in E2	E2 vs DMSO	3.43187282663847	3.73926230833352e-06	Intron (ENST00000693015.1/1662, intron 1 of 14)	1887	ENSG00000178105	DDX10	DEAD-box helicase 10
chr11	110093407	110094016	*	+ 2 fold & sig. in E2	E2 vs DMSO	7.18506268285459	0.00755557089278571	Promoter	15	ENSG00000149289	ZC3H12C	zinc finger CCCH-type containing 12C
chr11	110339377	110339960	*	+ 2 fold & sig. in E2	E2 vs DMSO	3.4727499270737	0.00411736935471634	Distal Intergenic	10969	NA	NA	NA
chr11	110356756	110357876	*	+ 2 fold & sig. in E2	E2 vs DMSO	2.10533417986177	3.87637205065976e-06	Intron (ENST00000526605.6/105369486, intron 1 of 2)	1453	NA	LINC02732	long intergenic non-protein coding RNA 2732
chr11	111800431	111801393	*	+ 2 fold & sig. in E2	E2 vs DMSO	2.54739904188092	0.000240297937929906	Intron (ENST00000532425.6/79796, intron 4 of 5)	8297	ENSG00000086848	ALG9	ALG9 alpha-1,2-mannosyltransferase
chr11	112253631	112253982	*	+ 2 fold & sig. in E2	E2 vs DMSO	6.45485134787342	0.0278827911271658	Intron (ENST00000531673.5/5805, intron 6 of 6)	-6283	ENSG00000268472	LOC100132686	uncharacterized LOC100132686
chr11	112290018	112290725	*	+ 2 fold & sig. in E2	E2 vs DMSO	4.03966174217781	0.000210841136333223	Promoter	0	ENSG00000250303	LINC02762	long intergenic non-protein coding RNA 2762
chr11	112292980	112293417	*	+ 2 fold & sig. in E2	E2 vs DMSO	3.20673315970679	0.000471011046202329	Promoter	407	ENSG00000250303	LINC02762	long intergenic non-protein coding RNA 2762
chr11	112318051	112318570	*	+ 2 fold & sig. in E2	E2 vs DMSO	7.32736265997851	0.00236887505781946	Intron (ENST00000504610.2/283140, intron 2 of 3)	25478	ENSG00000250303	LINC02762	long intergenic non-protein coding RNA 2762
chr11	112321565	112322365	*	+ 2 fold & sig. in E2	E2 vs DMSO	2.51045082194898	0.0126748689613005	Intron (ENST00000504610.2/283140, intron 2 of 3)	28992	ENSG00000250303	LINC02762	long intergenic non-protein coding RNA 2762
chr11	112342975	112343871	*	+ 2 fold & sig. in E2	E2 vs DMSO	2.33219736060722	0.0264082954849405	Intron (ENST00000504610.2/283140, intron 2 of 3)	-49247	ENSG00000254968	LINC02763	long intergenic non-protein coding RNA 2763
chr11	112554305	112555107	*	+ 2 fold & sig. in E2	E2 vs DMSO	3.10906786595181	0.00110651805193674	Intron (ENST00000665326.1/124902757, intron 2 of 2)	695	ENSG00000255484	LINC02764	long intergenic non-protein coding RNA 2764
chr11	113779377	113779608	*	+ 2 fold & sig. in E2	E2 vs DMSO	6.92592562169892	0.00797751252113125	Promoter	-188	ENSG00000228607	CLDN25	claudin 25
chr11	113781656	113782207	*	+ 2 fold & sig. in E2	E2 vs DMSO	2.15887817033673	0.000831836019955377	Distal Intergenic	1860	ENSG00000228607	CLDN25	claudin 25
chr11	114315789	114316538	*	+ 2 fold & sig. in E2	E2 vs DMSO	1.94721357646713	0.000208413608487555	Intron (ENST00000544925.1/ENST00000544925.1, intron 1 of 2)	17638	ENSG00000166741	NNMT	nicotinamide N-methyltransferase
chr11	1150661	1151307	*	+ 2 fold & sig. in E2	E2 vs DMSO	1.28278892689769	0.000788283817136308	Distal Intergenic	-6646	ENSG00000215182	MUC5AC	mucin 5AC, oligomeric mucus/gel-forming
chr11	1153757	1154552	*	+ 2 fold & sig. in E2	E2 vs DMSO	2.09087275051133	1.37656284702375e-07	Distal Intergenic	-3401	ENSG00000215182	MUC5AC	mucin 5AC, oligomeric mucus/gel-forming
chr11	115471272	115471924	*	+ 2 fold & sig. in E2	E2 vs DMSO	2.79230372084441	6.95047538320034e-07	Intron (ENST00000331581.11/23705, intron 1 of 11)	32465	ENSG00000182985	CADM1	cell adhesion molecule 1
chr11	115503742	115505022	*	+ 2 fold & sig. in E2	E2 vs DMSO	1.4958091143912	0.0245825660937132	Promoter	0	ENSG00000182985	CADM1	cell adhesion molecule 1
chr11	115550115	115550908	*	+ 2 fold & sig. in E2	E2 vs DMSO	3.14627179223718	0.000696874226331055	Distal Intergenic	-45158	ENSG00000182985	CADM1	cell adhesion molecule 1
chr11	115837462	115838031	*	+ 2 fold & sig. in E2	E2 vs DMSO	7.095083315006	0.00555477421051896	Intron (ENST00000539305.1/105369512, intron 2 of 2)	-76816	NA	LINC00900	long intergenic non-protein coding RNA 900
chr11	115893407	115894114	*	+ 2 fold & sig. in E2	E2 vs DMSO	3.31612775361019	3.15549144513295e-05	Distal Intergenic	-26134	NA	LINC02703	long intergenic non-protein coding RNA 2703
chr11	115920950	115921857	*	+ 2 fold & sig. in E2	E2 vs DMSO	1.64026753871817	0.0256141929979931	Intron (ENST00000653503.1/102724165, intron 1 of 6)	702	NA	LINC02703	long intergenic non-protein coding RNA 2703
chr11	115944504	115945090	*	+ 2 fold & sig. in E2	E2 vs DMSO	3.1685286004057	1.03296382420188e-09	Distal Intergenic	11647	NA	LINC02703	long intergenic non-protein coding RNA 2703
chr11	116740783	116741377	*	+ 2 fold & sig. in E2	E2 vs DMSO	3.55378924152987	0.00336971474773724	Distal Intergenic	21459	ENSG00000137656	BUD13	BUD13 homolog
chr11	116808119	116809203	*	+ 2 fold & sig. in E2	E2 vs DMSO	1.75621778114357	0.000113901326246127	Distal Intergenic	4800	NA	NA	NA
chr11	116831974	116833004	*	+ 2 fold & sig. in E2	E2 vs DMSO	2.49881109887731	5.63537193037476e-09	3' UTR	1445	ENSG00000110245	APOC3	apolipoprotein C3
chr11	116836240	116836516	*	+ 2 fold & sig. in E2	E2 vs DMSO	3.94104538754611	0.00039944606942706	Promoter	74	ENSG00000235910	APOA1-AS	APOA1 antisense RNA
chr11	117185133	117185690	*	+ 2 fold & sig. in E2	E2 vs DMSO	1.76262381905056	0.0156205301777941	Promoter	-261	ENSG00000149577	SIDT2	SID1 transmembrane family member 2
chr11	117302988	117303717	*	+ 2 fold & sig. in E2	E2 vs DMSO	3.70395662073117	1.8713525806812e-10	Intron (ENST00000313005.11/23621, intron 1 of 8)	-2251	ENSG00000186318	BACE1	beta-secretase 1
chr11	117999304	118000048	*	+ 2 fold & sig. in E2	E2 vs DMSO	1.86132575184162	0.00107338902631504	3' UTR	6246	ENSG00000110324	IL10RA	interleukin 10 receptor subunit alpha
chr11	118057370	118059326	*	+ 2 fold & sig. in E2	E2 vs DMSO	1.61443734742351	4.46957212742693e-07	Exon (ENST00000527329.5/100526771, exon 3 of 4)	-17686	ENSG00000137648	TMPRSS4	transmembrane serine protease 4
chr11	11972194	11972777	*	+ 2 fold & sig. in E2	E2 vs DMSO	2.86136065418614	0.000214807191817467	Intron (ENST00000396505.7/27122, intron 4 of 7)	-3448	ENSG00000050165	DKK3	dickkopf WNT signaling pathway inhibitor 3
chr11	1203138	1204289	*	+ 2 fold & sig. in E2	E2 vs DMSO	1.62692264566369	4.89073008435991e-06	Distal Intergenic	-18777	ENSG00000117983	MUC5B	mucin 5B, oligomeric mucus/gel-forming
chr11	120812730	120813355	*	+ 2 fold & sig. in E2	E2 vs DMSO	1.60784929458972	0.000268009558133577	Intron (ENST00000638419.1/2900, intron 4 of 20)	-44885	ENSG00000149403	GRIK4	glutamate ionotropic receptor kainate type subunit 4
chr11	120985770	120986562	*	+ 2 fold & sig. in E2	E2 vs DMSO	2.03181917521446	0.0481265732465591	3' UTR	-37510	ENSG00000154114	TBCEL	tubulin folding cofactor E like
chr11	12109897	12111196	*	+ 2 fold & sig. in E2	E2 vs DMSO	1.67409403959206	0.00232169772917227	Promoter	0	ENSG00000133816	MICAL2	microtubule associated monooxygenase, calponin and LIM domain containing 2
chr11	121325994	121326563	*	+ 2 fold & sig. in E2	E2 vs DMSO	1.39049778506397	0.0131503139433568	Distal Intergenic	20244	ENSG00000109929	SC5D	sterol-C5-desaturase
chr11	12138103	12138777	*	+ 2 fold & sig. in E2	E2 vs DMSO	2.38352638804401	0.00698342836712851	Promoter	0	ENSG00000133816	MICAL2	microtubule associated monooxygenase, calponin and LIM domain containing 2
chr11	12245456	12246211	*	+ 2 fold & sig. in E2	E2 vs DMSO	1.4661827450993	1.18100857749153e-05	Intron (ENST00000683283.1/9645, intron 21 of 27)	2256	ENSG00000133816	MICAL2	microtubule associated monooxygenase, calponin and LIM domain containing 2
chr11	123097758	123097985	*	+ 2 fold & sig. in E2	E2 vs DMSO	2.69883125808249	0.00670241505538671	Promoter	0	ENSG00000166250	CLMP	CXADR like membrane protein
chr11	123300859	123301613	*	+ 2 fold & sig. in E2	E2 vs DMSO	2.29005612868176	0.0354087525808784	Promoter	0	NA	NA	NA
chr11	123444971	123445771	*	+ 2 fold & sig. in E2	E2 vs DMSO	2.09830167002473	0.0177415026445775	Intron (ENST00000638157.1/57476, intron 1 of 20)	-8627	ENSG00000023171	GRAMD1B	GRAM domain containing 1B
chr11	126082824	126083681	*	+ 2 fold & sig. in E2	E2 vs DMSO	2.39010617529187	0.000789282893055362	Distal Intergenic	-19489	ENSG00000064309	CDON	cell adhesion associated, oncogene regulated
chr11	12794874	12795445	*	+ 2 fold & sig. in E2	E2 vs DMSO	6.68142021159753	0.0160292941403953	Intron (ENST00000527636.7/7003, intron 3 of 12)	-32676	ENSG00000187079	TEAD1	TEA domain transcription factor 1
chr11	12829159	12829709	*	+ 2 fold & sig. in E2	E2 vs DMSO	2.01088714929987	0.0117398578716328	Intron (ENST00000527636.7/7003, intron 3 of 12)	1038	ENSG00000187079	TEAD1	TEA domain transcription factor 1
chr11	129324100	129325218	*	+ 2 fold & sig. in E2	E2 vs DMSO	1.18148135972032	0.000692456993732036	Distal Intergenic	-44776	ENSG00000134909	ARHGAP32	Rho GTPase activating protein 32
chr11	129363894	129364614	*	+ 2 fold & sig. in E2	E2 vs DMSO	2.43693761414933	0.00410931554529685	Distal Intergenic	-11234	ENSG00000043039	BARX2	BARX homeobox 2
chr11	129375207	129375908	*	+ 2 fold & sig. in E2	E2 vs DMSO	3.64084213841133	6.21427719854146e-05	Promoter	0	ENSG00000043039	BARX2	BARX homeobox 2
chr11	129456906	129457731	*	+ 2 fold & sig. in E2	E2 vs DMSO	1.22485750668716	0.00585668228526087	Distal Intergenic	81058	ENSG00000043039	BARX2	BARX homeobox 2
chr11	129458671	129459573	*	+ 2 fold & sig. in E2	E2 vs DMSO	1.13095589186859	0.00560219636658234	Distal Intergenic	82823	ENSG00000043039	BARX2	BARX homeobox 2
chr11	129633181	129633857	*	+ 2 fold & sig. in E2	E2 vs DMSO	2.56630588496981	0.00208223457268178	Distal Intergenic	-15912	ENSG00000281097	LINC01395	long intergenic non-protein coding RNA 1395
chr11	129642997	129643784	*	+ 2 fold & sig. in E2	E2 vs DMSO	3.0596282148119	1.28541620406334e-08	Distal Intergenic	-25728	ENSG00000281097	LINC01395	long intergenic non-protein coding RNA 1395
chr11	129687113	129687868	*	+ 2 fold & sig. in E2	E2 vs DMSO	4.09257685796058	8.39782098896025e-09	Distal Intergenic	-69844	ENSG00000281097	LINC01395	long intergenic non-protein coding RNA 1395
chr11	129694392	129695092	*	+ 2 fold & sig. in E2	E2 vs DMSO	4.58234773311274	9.13626389310148e-16	Distal Intergenic	-77123	ENSG00000281097	LINC01395	long intergenic non-protein coding RNA 1395
chr11	129695551	129696468	*	+ 2 fold & sig. in E2	E2 vs DMSO	3.88828275965649	7.56140059190413e-15	Distal Intergenic	-78282	ENSG00000281097	LINC01395	long intergenic non-protein coding RNA 1395
chr11	129709945	129710586	*	+ 2 fold & sig. in E2	E2 vs DMSO	3.7105556592817	2.31455756757652e-05	Distal Intergenic	-92676	ENSG00000281097	LINC01395	long intergenic non-protein coding RNA 1395
chr11	129731223	129731964	*	+ 2 fold & sig. in E2	E2 vs DMSO	2.08621077681615	3.6016771756618e-07	Distal Intergenic	82726	NA	NA	NA
chr11	129750495	129751131	*	+ 2 fold & sig. in E2	E2 vs DMSO	2.32354794789203	0.0330261157560226	Distal Intergenic	63559	NA	NA	NA
chr11	13009011	13009645	*	+ 2 fold & sig. in E2	E2 vs DMSO	2.90907356468379	0.0220620661603626	Promoter	0	ENSG00000254670	RASSF10-DT	RASSF10 divergent transcript
chr11	131033089	131033692	*	+ 2 fold & sig. in E2	E2 vs DMSO	2.33156153622508	0.0224572762489323	Distal Intergenic	-116610	ENSG00000120451	SNX19	sorting nexin 19
chr11	131681927	131682556	*	+ 2 fold & sig. in E2	E2 vs DMSO	2.24130238140797	0.0038420515009941	Intron (ENST00000374791.7/50863, intron 1 of 7)	-18320	NA	NTM-AS1	NTM antisense RNA 1
chr11	131691988	131692630	*	+ 2 fold & sig. in E2	E2 vs DMSO	2.97683562392205	1.27353764024209e-09	Intron (ENST00000374791.7/50863, intron 1 of 7)	-28381	NA	NTM-AS1	NTM antisense RNA 1
chr11	131896825	131897723	*	+ 2 fold & sig. in E2	E2 vs DMSO	3.4042273552709	4.29589776221004e-09	Promoter	0	NA	LOC107984413	uncharacterized LOC107984413
chr11	134169812	134171072	*	+ 2 fold & sig. in E2	E2 vs DMSO	2.80083163883188	4.18829968489256e-07	Intron (ENST00000534548.7/23310, intron 24 of 34)	-1617	ENSG00000151503	NCAPD3	non-SMC condensin II complex subunit D3
chr11	134488997	134489435	*	+ 2 fold & sig. in E2	E2 vs DMSO	7.09269863898624	0.00504015583073764	Intron (ENST00000661684.1/283177, intron 3 of 3)	9698	ENSG00000255545	B3GAT1-DT	B3GAT1 divergent transcript
chr11	134639871	134640719	*	+ 2 fold & sig. in E2	E2 vs DMSO	4.66450668254853	4.89784188197623e-15	Distal Intergenic	-71820	NA	LINC02706	long intergenic non-protein coding RNA 2706
chr11	13718881	13719943	*	+ 2 fold & sig. in E2	E2 vs DMSO	3.51022560785137	0.00324067977376396	Promoter	0	ENSG00000197601	FAR1	fatty acyl-CoA reductase 1
chr11	13952237	13953035	*	+ 2 fold & sig. in E2	E2 vs DMSO	7.78174525911878	0.000498837730874943	Distal Intergenic	-9688	ENSG00000262655	SPON1	spondin 1
chr11	14015520	14016240	*	+ 2 fold & sig. in E2	E2 vs DMSO	3.38141670489828	1.4107529867983e-09	Intron (ENST00000576479.4/10418, intron 2 of 15)	52797	ENSG00000262655	SPON1	spondin 1
chr11	14029861	14030524	*	+ 2 fold & sig. in E2	E2 vs DMSO	2.39832504347702	0.00704259845980931	Intron (ENST00000576479.4/10418, intron 2 of 15)	67138	ENSG00000262655	SPON1	spondin 1
chr11	1485711	1486414	*	+ 2 fold & sig. in E2	E2 vs DMSO	1.10331009030676	0.026146703314036	Promoter	365	ENSG00000182208	MOB2	MOB kinase activator 2
chr11	15493895	15494584	*	+ 2 fold & sig. in E2	E2 vs DMSO	2.14938842950819	0.00473696947217847	Distal Intergenic	-58271	ENSG00000254946	LINC02751	long intergenic non-protein coding RNA 2751
chr11	15615315	15616312	*	+ 2 fold & sig. in E2	E2 vs DMSO	2.77937223092681	1.67170927237105e-08	Intron (ENST00000532242.2/105376569, intron 1 of 3)	6079	NA	LOC105376568	uncharacterized LOC105376568
chr11	15650037	15650931	*	+ 2 fold & sig. in E2	E2 vs DMSO	1.61637021866143	0.00212175583284056	Intron (ENST00000532242.2/105376569, intron 2 of 3)	-27590	NA	LOC105376568	uncharacterized LOC105376568
chr11	1650104	1650948	*	+ 2 fold & sig. in E2	E2 vs DMSO	2.94542430197981	3.04081083987581e-08	Distal Intergenic	-14649	ENSG00000205866	FAM99A	family with sequence similarity 99 member A
chr11	1652880	1653342	*	+ 2 fold & sig. in E2	E2 vs DMSO	2.08313596961258	0.0282760626612033	Distal Intergenic	-12255	ENSG00000205866	FAM99A	family with sequence similarity 99 member A
chr11	1693453	1694531	*	+ 2 fold & sig. in E2	E2 vs DMSO	1.63647143093806	0.000214343800744191	Distal Intergenic	-2664	ENSG00000205864	KRTAP5-6	keratin associated protein 5-6
chr11	16956397	16957172	*	+ 2 fold & sig. in E2	E2 vs DMSO	2.14962891890259	4.1458433643822e-07	Intron (ENST00000531066.6/144100, intron 3 of 26)	-42913	ENSG00000166689	PLEKHA7	pleckstrin homology domain containing A7
chr11	16982332	16982794	*	+ 2 fold & sig. in E2	E2 vs DMSO	2.2528053971278	0.00855033428608653	Intron (ENST00000531066.6/144100, intron 3 of 26)	30548	ENSG00000166689	PLEKHA7	pleckstrin homology domain containing A7
chr11	16989398	16989787	*	+ 2 fold & sig. in E2	E2 vs DMSO	1.91311408426618	0.010347155605649	Intron (ENST00000531066.6/144100, intron 3 of 26)	23555	ENSG00000166689	PLEKHA7	pleckstrin homology domain containing A7
chr11	17238311	17239846	*	+ 2 fold & sig. in E2	E2 vs DMSO	1.40205726713998	2.62505271941464e-05	Intron (ENST00000528644.5/4925, intron 1 of 2)	-20494	ENSG00000070081	NUCB2	nucleobindin 2
chr11	17405386	17406433	*	+ 2 fold & sig. in E2	E2 vs DMSO	4.86147140657598	2.18763191369554e-13	Promoter	-739	ENSG00000006071	ABCC8	ATP binding cassette subfamily C member 8
chr11	17413289	17414055	*	+ 2 fold & sig. in E2	E2 vs DMSO	1.55382752770436	0.00742356826130754	Promoter	0	ENSG00000006071	ABCC8	ATP binding cassette subfamily C member 8
chr11	1749283	1750365	*	+ 2 fold & sig. in E2	E2 vs DMSO	1.66936346696606	2.19977240731279e-06	Promoter	-86	ENSG00000244242	IFITM10	interferon induced transmembrane protein 10
chr11	1762131	1764657	*	+ 2 fold & sig. in E2	E2 vs DMSO	1.44587302508305	3.35461520382107e-06	Promoter	0	ENSG00000117984	CTSD	cathepsin D
chr11	1770682	1771059	*	+ 2 fold & sig. in E2	E2 vs DMSO	3.32440108548356	1.76351680567215e-12	Distal Intergenic	-6109	ENSG00000117984	CTSD	cathepsin D
chr11	17769838	17770687	*	+ 2 fold & sig. in E2	E2 vs DMSO	2.19100312916535	0.000120173147983202	Intron (ENST00000379472.4/3746, intron 1 of 1)	-1504	NA	LOC107984317	uncharacterized LOC107984317
chr11	1778105	1778846	*	+ 2 fold & sig. in E2	E2 vs DMSO	2.20449802885687	2.66975064223552e-08	Promoter	0	NA	LOC105376517	uncharacterized LOC105376517
chr11	17924594	17925217	*	+ 2 fold & sig. in E2	E2 vs DMSO	4.24213202249197	5.43855907598395e-05	Intron (ENST00000528369.5/26297, intron 1 of 2)	14415	ENSG00000129158	SERGEF	secretion regulating guanine nucleotide exchange factor
chr11	17927498	17928165	*	+ 2 fold & sig. in E2	E2 vs DMSO	3.53348469910827	2.79045213976939e-05	Intron (ENST00000528369.5/26297, intron 1 of 2)	11467	ENSG00000129158	SERGEF	secretion regulating guanine nucleotide exchange factor
chr11	1825090	1825405	*	+ 2 fold & sig. in E2	E2 vs DMSO	2.93210001456142	6.36656153808294e-09	Distal Intergenic	-2902	ENSG00000149043	SYT8	synaptotagmin 8
chr11	1830583	1831170	*	+ 2 fold & sig. in E2	E2 vs DMSO	2.11129533815499	4.43854094752258e-10	Promoter	0	ENSG00000149043	SYT8	synaptotagmin 8
chr11	19240913	19241681	*	+ 2 fold & sig. in E2	E2 vs DMSO	2.24789927039376	0.00404415406064205	Promoter	0	ENSG00000129173	E2F8	E2F transcription factor 8
chr11	19268558	19269499	*	+ 2 fold & sig. in E2	E2 vs DMSO	2.88405800584557	2.2283693535122e-09	Intron (ENST00000527978.1/105376580, intron 3 of 3)	-26938	ENSG00000129173	E2F8	E2F transcription factor 8
chr11	19276829	19277759	*	+ 2 fold & sig. in E2	E2 vs DMSO	1.65902707943627	0.00134615286273444	Intron (ENST00000527978.1/105376580, intron 3 of 3)	-22124	NA	CSRP3-AS1	CSRP3 and E2F8 antisense RNA 1
chr11	19332333	19332839	*	+ 2 fold & sig. in E2	E2 vs DMSO	7.13650245651429	0.00458763151734073	Distal Intergenic	-17885	ENSG00000166833	NAV2	neuron navigator 2
chr11	19344528	19345630	*	+ 2 fold & sig. in E2	E2 vs DMSO	2.42753352719337	0.00580999789472318	Distal Intergenic	-5094	ENSG00000166833	NAV2	neuron navigator 2
chr11	19380241	19380925	*	+ 2 fold & sig. in E2	E2 vs DMSO	1.79847145308936	0.0018231068538746	Exon (ENST00000528204.1/ENST00000528204.1, exon 1 of 2)	29517	ENSG00000166833	NAV2	neuron navigator 2
chr11	19389627	19390370	*	+ 2 fold & sig. in E2	E2 vs DMSO	3.21783685408068	1.43824022946441e-06	Intron (ENST00000360655.8/89797, intron 1 of 37)	38903	ENSG00000166833	NAV2	neuron navigator 2
chr11	19469714	19470391	*	+ 2 fold & sig. in E2	E2 vs DMSO	2.09063458407925	0.0210087250245717	Intron (ENST00000360655.8/89797, intron 1 of 37)	35509	ENSG00000255043	NAV2-AS5	NAV2 antisense RNA 5
chr11	1947636	1948192	*	+ 2 fold & sig. in E2	E2 vs DMSO	2.53415184508789	0.00276066164394957	Promoter	82	ENSG00000214026	MRPL23	mitochondrial ribosomal protein L23
chr11	1968543	1969692	*	+ 2 fold & sig. in E2	E2 vs DMSO	2.36615443805371	8.71725843051966e-06	Intron (ENST00000397297.7/6150, intron 4 of 5)	12966	ENSG00000214026	MRPL23	mitochondrial ribosomal protein L23
chr11	1986881	1987682	*	+ 2 fold & sig. in E2	E2 vs DMSO	4.03880082720703	3.42838677476096e-13	Intron (ENST00000419080.3/100133545, intron 1 of 3)	2311	ENSG00000226416	MRPL23-AS1	MRPL23 antisense RNA 1
chr11	19919117	19919763	*	+ 2 fold & sig. in E2	E2 vs DMSO	3.53260053713555	1.47325680051768e-11	Intron (ENST00000360655.8/89797, intron 6 of 37)	-12002	ENSG00000166833	NAV2	neuron navigator 2
chr11	19922559	19923224	*	+ 2 fold & sig. in E2	E2 vs DMSO	4.49030310543903	9.74156696607152e-13	Intron (ENST00000360655.8/89797, intron 6 of 37)	-8541	ENSG00000166833	NAV2	neuron navigator 2
chr11	19924533	19924951	*	+ 2 fold & sig. in E2	E2 vs DMSO	3.71729946532625	3.73251130286552e-07	Intron (ENST00000360655.8/89797, intron 6 of 37)	-6814	ENSG00000166833	NAV2	neuron navigator 2
chr11	19951685	19952033	*	+ 2 fold & sig. in E2	E2 vs DMSO	6.80901244919365	0.0106157983903655	Intron (ENST00000360655.8/89797, intron 10 of 37)	19920	ENSG00000166833	NAV2	neuron navigator 2
chr11	19952081	19952571	*	+ 2 fold & sig. in E2	E2 vs DMSO	2.08167708892139	0.0281162285585581	Intron (ENST00000360655.8/89797, intron 10 of 37)	20316	ENSG00000166833	NAV2	neuron navigator 2
chr11	19953940	19954242	*	+ 2 fold & sig. in E2	E2 vs DMSO	1.87708193959203	0.0489527911321143	Intron (ENST00000360655.8/89797, intron 10 of 37)	22175	ENSG00000166833	NAV2	neuron navigator 2
chr11	19978565	19979403	*	+ 2 fold & sig. in E2	E2 vs DMSO	3.0670823176637	1.02443675235955e-10	Exon (ENST00000534036.1/100874013, exon 2 of 2)	1934	NA	NAV2-AS3	NAV2 antisense RNA 3
chr11	19981349	19981954	*	+ 2 fold & sig. in E2	E2 vs DMSO	1.82016269659977	0.00474215272107658	Promoter	-12	NA	NAV2-AS3	NAV2 antisense RNA 3
chr11	20000637	20001114	*	+ 2 fold & sig. in E2	E2 vs DMSO	2.17536744257957	0.0226226730888103	Intron (ENST00000360655.8/89797, intron 11 of 37)	-19300	NA	NAV2-AS3	NAV2 antisense RNA 3
chr11	20027217	20027600	*	+ 2 fold & sig. in E2	E2 vs DMSO	1.52975932374617	0.000179432723237958	Promoter	0	ENSG00000166833	NAV2	neuron navigator 2
chr11	20041937	20042736	*	+ 2 fold & sig. in E2	E2 vs DMSO	1.97006241247631	1.92079563677397e-05	Intron (ENST00000360655.8/89797, intron 12 of 37)	6722	ENSG00000254453	NAV2-AS2	NAV2 antisense RNA 2
chr11	20068601	20069261	*	+ 2 fold & sig. in E2	E2 vs DMSO	2.03696650609757	0.0209360841763563	Intron (ENST00000360655.8/89797, intron 22 of 37)	-19143	ENSG00000254453	NAV2-AS2	NAV2 antisense RNA 2
chr11	20070301	20070805	*	+ 2 fold & sig. in E2	E2 vs DMSO	2.84548491934259	0.0372280483561034	Intron (ENST00000360655.8/89797, intron 22 of 37)	-20843	ENSG00000254453	NAV2-AS2	NAV2 antisense RNA 2
chr11	20110814	20111318	*	+ 2 fold & sig. in E2	E2 vs DMSO	1.6379015827053	0.00173987923974166	Intron (ENST00000360655.8/89797, intron 36 of 37)	-3065	ENSG00000166833	NAV2	neuron navigator 2
chr11	20112154	20112940	*	+ 2 fold & sig. in E2	E2 vs DMSO	2.61801468664118	1.41967099978403e-07	Intron (ENST00000360655.8/89797, intron 36 of 37)	-1443	ENSG00000166833	NAV2	neuron navigator 2
chr11	20113893	20114508	*	+ 2 fold & sig. in E2	E2 vs DMSO	5.03706929475314	3.69494873202008e-07	Promoter	0	ENSG00000166833	NAV2	neuron navigator 2
chr11	2165144	2165632	*	+ 2 fold & sig. in E2	E2 vs DMSO	3.50039317443307	3.42611636827775e-14	3' UTR	1142	ENSG00000180176	TH	tyrosine hydroxylase
chr11	2175512	2176329	*	+ 2 fold & sig. in E2	E2 vs DMSO	2.72412267253121	7.08290283138714e-09	Distal Intergenic	2449	ENSG00000265258	MIR4686	microRNA 4686
chr11	2178752	2179488	*	+ 2 fold & sig. in E2	E2 vs DMSO	2.61566162356479	2.71741974475418e-08	Distal Intergenic	5689	ENSG00000265258	MIR4686	microRNA 4686
chr11	2190795	2191501	*	+ 2 fold & sig. in E2	E2 vs DMSO	4.13802984294792	2.58937219529924e-16	Distal Intergenic	17732	ENSG00000265258	MIR4686	microRNA 4686
chr11	21949645	21950469	*	+ 2 fold & sig. in E2	E2 vs DMSO	2.06705643892438	0.00523668384829827	Intron (ENST00000682428.1/102723370, intron 5 of 6)	149711	ENSG00000171714	ANO5	anoctamin 5
chr11	2269061	2269691	*	+ 2 fold & sig. in E2	E2 vs DMSO	8.85516065958404	1.46499787485532e-06	3' UTR	897	ENSG00000183734	ASCL2	achaete-scute family bHLH transcription factor 2
chr11	2270669	2271915	*	+ 2 fold & sig. in E2	E2 vs DMSO	1.76062697113583	0.000151684068893935	Promoter	-81	ENSG00000183734	ASCL2	achaete-scute family bHLH transcription factor 2
chr11	2305265	2305976	*	+ 2 fold & sig. in E2	E2 vs DMSO	1.02559539601792	0.0384861505390363	Promoter	-969	ENSG00000064201	TSPAN32	tetraspanin 32
chr11	2483271	2483989	*	+ 2 fold & sig. in E2	E2 vs DMSO	1.66282196320215	0.00225352132858619	Intron (ENST00000496887.6/3784, intron 2 of 6)	21384	ENSG00000053918	KCNQ1	potassium voltage-gated channel subfamily Q member 1
chr11	282485	283152	*	+ 2 fold & sig. in E2	E2 vs DMSO	1.76000573145463	0.00589556032352219	Exon (ENST00000534750.6/171389, exon 5 of 8)	3426	ENSG00000174885	NLRP6	NLR family pyrin domain containing 6
chr11	3010457	3011244	*	+ 2 fold & sig. in E2	E2 vs DMSO	2.29822143482125	0.00263737327511184	Promoter	-924	ENSG00000110619	CARS1	cysteinyl-tRNA synthetase 1
chr11	30411327	30411778	*	+ 2 fold & sig. in E2	E2 vs DMSO	4.02741114499192	0.000375115569646367	3' UTR	29625	ENSG00000066382	MPPED2	metallophosphoesterase domain containing 2
chr11	30418512	30418885	*	+ 2 fold & sig. in E2	E2 vs DMSO	2.7394110399547	0.00802276995005283	Intron (ENST00000448418.6/744, intron 4 of 6)	22518	ENSG00000066382	MPPED2	metallophosphoesterase domain containing 2
chr11	30435512	30436033	*	+ 2 fold & sig. in E2	E2 vs DMSO	2.45762695854779	0.00329549366595163	Intron (ENST00000448418.6/744, intron 4 of 6)	5370	ENSG00000066382	MPPED2	metallophosphoesterase domain containing 2
chr11	30438608	30438948	*	+ 2 fold & sig. in E2	E2 vs DMSO	7.03374145204899	0.00680604785295992	Intron (ENST00000448418.6/744, intron 4 of 6)	2455	ENSG00000066382	MPPED2	metallophosphoesterase domain containing 2
chr11	30527498	30528375	*	+ 2 fold & sig. in E2	E2 vs DMSO	2.75061927834157	0.00089244272455225	Intron (ENST00000448418.6/744, intron 3 of 6)	7690	ENSG00000066382	MPPED2	metallophosphoesterase domain containing 2
chr11	30585324	30586893	*	+ 2 fold & sig. in E2	E2 vs DMSO	2.04497563876422	0.018235260209549	Promoter	0	ENSG00000066382	MPPED2	metallophosphoesterase domain containing 2
chr11	30868366	30869239	*	+ 2 fold & sig. in E2	E2 vs DMSO	2.07870800098486	1.51829845058221e-06	Intron (ENST00000444572.6/341019, intron 16 of 20)	37466	ENSG00000170959	DCDC1	doublecortin domain containing 1
chr11	30911071	30911875	*	+ 2 fold & sig. in E2	E2 vs DMSO	1.44120555381631	0.000593925281688907	Exon (ENST00000444572.6/341019, exon 6 of 21)	-1967	ENSG00000170959	DCDC1	doublecortin domain containing 1
chr11	3215245	3215970	*	+ 2 fold & sig. in E2	E2 vs DMSO	2.28971112298499	0.000570126771867926	Distal Intergenic	-2362	ENSG00000236301	MRGPRG-AS1	MRGPRG antisense RNA 1
chr11	34284745	34285324	*	+ 2 fold & sig. in E2	E2 vs DMSO	2.51047493817244	0.000591014582612914	Intron (ENST00000435224.3/25841, intron 1 of 16)	-42200	ENSG00000166016	ABTB2	ankyrin repeat and BTB domain containing 2
chr11	34296077	34296873	*	+ 2 fold & sig. in E2	E2 vs DMSO	2.03010083115547	0.0276625758959836	Intron (ENST00000435224.3/25841, intron 1 of 16)	-53532	ENSG00000166016	ABTB2	ankyrin repeat and BTB domain containing 2
chr11	35009112	35010420	*	+ 2 fold & sig. in E2	E2 vs DMSO	1.61966299096669	1.95312421773476e-05	Intron (ENST00000477173.3/8050, intron 2 of 2)	24479	ENSG00000110435	PDHX	pyruvate dehydrogenase complex component X
chr11	35016589	35017195	*	+ 2 fold & sig. in E2	E2 vs DMSO	2.85426983579048	0.0315669811539852	Intron (ENST00000477173.3/8050, intron 2 of 2)	31956	ENSG00000110435	PDHX	pyruvate dehydrogenase complex component X
chr11	35097701	35098380	*	+ 2 fold & sig. in E2	E2 vs DMSO	4.56730761738918	5.73410335752524e-06	Distal Intergenic	-30509	NA	LOC105376626	uncharacterized LOC105376626
chr11	35264214	35264751	*	+ 2 fold & sig. in E2	E2 vs DMSO	8.90087613374365	9.50005680853579e-07	Promoter	-71	ENSG00000110436	SLC1A2	solute carrier family 1 member 2
chr11	35295528	35296380	*	+ 2 fold & sig. in E2	E2 vs DMSO	2.22033040474803	4.82894892786025e-05	Intron (ENST00000278379.9/6506, intron 6 of 10)	5261	ENSG00000110436	SLC1A2	solute carrier family 1 member 2
chr11	35359992	35360455	*	+ 2 fold & sig. in E2	E2 vs DMSO	3.29344235304984	1.11873477147609e-05	Promoter	0	ENSG00000110436	SLC1A2	solute carrier family 1 member 2
chr11	35403305	35403919	*	+ 2 fold & sig. in E2	E2 vs DMSO	6.6814122874428	0.0173076187885705	Intron (ENST00000278379.9/6506, intron 1 of 10)	571	ENSG00000110436	SLC1A2	solute carrier family 1 member 2
chr11	35797323	35798310	*	+ 2 fold & sig. in E2	E2 vs DMSO	3.38482777386489	2.03888596840523e-07	Intron (ENST00000299413.7/54765, intron 4 of 4)	73067	ENSG00000166326	TRIM44	tripartite motif containing 44
chr11	35949873	35950581	*	+ 2 fold & sig. in E2	E2 vs DMSO	3.54959342063055	5.2763316277237e-08	Intron (ENST00000524419.5/143458, intron 1 of 5)	5774	ENSG00000179241	LDLRAD3	low density lipoprotein receptor class A domain containing 3
chr11	36149473	36150178	*	+ 2 fold & sig. in E2	E2 vs DMSO	3.27860704901575	7.49868074102581e-07	Intron (ENST00000524419.5/143458, intron 4 of 5)	-13121	ENSG00000179241	LDLRAD3	low density lipoprotein receptor class A domain containing 3
chr11	37484233	37485044	*	+ 2 fold & sig. in E2	E2 vs DMSO	1.21278707047574	0.0369998418141293	Distal Intergenic	-453557	ENSG00000254516	LINC02760	long intergenic non-protein coding RNA 2760
chr11	38382694	38383103	*	+ 2 fold & sig. in E2	E2 vs DMSO	6.54608793462072	0.0315443947316563	Distal Intergenic	263239	ENSG00000255175	LINC02759	long intergenic non-protein coding RNA 2759
chr11	38811203	38811949	*	+ 2 fold & sig. in E2	E2 vs DMSO	2.99640278619716	0.00114700532221179	Distal Intergenic	162345	ENSG00000254562	LINC01493	long intergenic non-protein coding RNA 1493
chr11	38937470	38938093	*	+ 2 fold & sig. in E2	E2 vs DMSO	2.20977091776717	0.00658992211063035	Distal Intergenic	288612	ENSG00000254562	LINC01493	long intergenic non-protein coding RNA 1493
chr11	38971939	38972616	*	+ 2 fold & sig. in E2	E2 vs DMSO	1.61264006457906	0.0148475733834603	Distal Intergenic	323081	ENSG00000254562	LINC01493	long intergenic non-protein coding RNA 1493
chr11	38994460	38995327	*	+ 2 fold & sig. in E2	E2 vs DMSO	1.32776017411394	0.0247756753122295	Distal Intergenic	345602	ENSG00000254562	LINC01493	long intergenic non-protein coding RNA 1493
chr11	393741	394343	*	+ 2 fold & sig. in E2	E2 vs DMSO	2.07868948602256	8.67746294606353e-06	Promoter	0	ENSG00000184363	PKP3	plakophilin 3
chr11	395716	396818	*	+ 2 fold & sig. in E2	E2 vs DMSO	3.25242524276057	4.68674082295956e-14	Promoter	0	ENSG00000184363	PKP3	plakophilin 3
chr11	43920438	43921237	*	+ 2 fold & sig. in E2	E2 vs DMSO	1.02548188946371	0.0309016309820705	Promoter	0	ENSG00000244926	ALKBH3-AS1	ALKBH3 antisense RNA 1
chr11	44095987	44096727	*	+ 2 fold & sig. in E2	E2 vs DMSO	1.89195162774744	0.0238681534367303	Promoter	158	ENSG00000151348	EXT2	exostosin glycosyltransferase 2
chr11	44300687	44301538	*	+ 2 fold & sig. in E2	E2 vs DMSO	2.65704257052566	2.42257631131044e-07	Intron (ENST00000652299.1/60529, intron 1 of 3)	8601	ENSG00000052850	ALX4	ALX homeobox 4
chr11	44589293	44589820	*	+ 2 fold & sig. in E2	E2 vs DMSO	2.89064154453003	0.0312778717630024	Intron (ENST00000526958.5/3732, intron 2 of 6)	2061	ENSG00000085117	CD82	CD82 molecule
chr11	447932	448670	*	+ 2 fold & sig. in E2	E2 vs DMSO	1.10967948667951	0.0227451043292625	Promoter	0	ENSG00000174915	PTDSS2	phosphatidylserine synthase 2
chr11	44949229	44950028	*	+ 2 fold & sig. in E2	E2 vs DMSO	2.90546583894388	0.00268846349367984	Promoter	132	ENSG00000175274	TP53I11	tumor protein p53 inducible protein 11
chr11	44950562	44951192	*	+ 2 fold & sig. in E2	E2 vs DMSO	3.41262315720711	0.00471880277999198	Promoter	0	ENSG00000175274	TP53I11	tumor protein p53 inducible protein 11
chr11	45161155	45162038	*	+ 2 fold & sig. in E2	E2 vs DMSO	1.54371799653715	0.00401442962532963	Intron (ENST00000530656.5/56981, intron 1 of 6)	13812	ENSG00000019485	PRDM11	PR/SET domain 11
chr11	45408426	45409900	*	+ 2 fold & sig. in E2	E2 vs DMSO	2.790206465309	1.92055199778974e-08	Intron (ENST00000528445.1/ENST00000528445.1, intron 2 of 2)	23279	ENSG00000255267	LINC02687	long intergenic non-protein coding RNA 2687
chr11	45677954	45678452	*	+ 2 fold & sig. in E2	E2 vs DMSO	2.95824317321065	0.0256014964607159	Distal Intergenic	-12332	ENSG00000175264	CHST1	carbohydrate sulfotransferase 1
chr11	46234019	46234735	*	+ 2 fold & sig. in E2	E2 vs DMSO	3.67702172996684	1.28872249306985e-10	Distal Intergenic	-13581	NA	LINC02710	long intergenic non-protein coding RNA 2710
chr11	46362873	46364255	*	+ 2 fold & sig. in E2	E2 vs DMSO	2.07421460190726	8.97082628393307e-10	Intron (ENST00000343674.10/8525, intron 1 of 30)	1266	ENSG00000149091	DGKZ	diacylglycerol kinase zeta
chr11	469663	470565	*	+ 2 fold & sig. in E2	E2 vs DMSO	4.53882277489406	5.72234942775978e-13	Intron (ENST00000532614.5/81490, intron 2 of 3)	-3355	ENSG00000174915	PTDSS2	phosphatidylserine synthase 2
chr11	47354950	47355881	*	+ 2 fold & sig. in E2	E2 vs DMSO	1.656124229519	0.00872171561897693	3' UTR	-2248	ENSG00000134571	MYBPC3	myosin binding protein C3
chr11	506195	507533	*	+ 2 fold & sig. in E2	E2 vs DMSO	2.47290416024136	3.43987198652541e-06	Promoter	0	ENSG00000023191	RNH1	ribonuclease/angiogenin inhibitor 1
chr11	537336	537821	*	+ 2 fold & sig. in E2	E2 vs DMSO	1.20257499280827	0.00726276615188037	Promoter	0	ENSG00000161328	LRRC56	leucine rich repeat containing 56
chr11	539775	540696	*	+ 2 fold & sig. in E2	E2 vs DMSO	1.59858471427094	5.77651034680572e-06	5' UTR	2248	ENSG00000161328	LRRC56	leucine rich repeat containing 56
chr11	569438	569992	*	+ 2 fold & sig. in E2	E2 vs DMSO	2.76364312590164	0.000445167098553288	Promoter	-981	ENSG00000247095	MIR210HG	MIR210 host gene
chr11	60332431	60333125	*	+ 2 fold & sig. in E2	E2 vs DMSO	3.08933417174309	0.0169106300192247	Intron (ENST00000684409.1/245802, intron 1 of 4)	-1706	ENSG00000166926	MS4A6E	membrane spanning 4-domains A6E
chr11	61728699	61729482	*	+ 2 fold & sig. in E2	E2 vs DMSO	1.38484615725378	0.0162304308693675	3' UTR	-23154	ENSG00000124920	MYRF	myelin regulatory factor
chr11	62052917	62053355	*	+ 2 fold & sig. in E2	E2 vs DMSO	6.45941636352049	0.0235710565976026	Intron (ENST00000658933.1/100507521, intron 2 of 2)	28613	ENSG00000255553	LINC02733	long intergenic non-protein coding RNA 2733
chr11	63591061	63591847	*	+ 2 fold & sig. in E2	E2 vs DMSO	1.12104542001974	0.0465511016408032	Intron (ENST00000323646.9/11145, intron 2 of 3)	6868	ENSG00000176485	PLAAT3	phospholipase A and acyltransferase 3
chr11	63620018	63620484	*	+ 2 fold & sig. in E2	E2 vs DMSO	1.56380940848806	0.0131930501746286	Intron (ENST00000542805.1/ENST00000542805.1, intron 1 of 1)	-3135	ENSG00000176485	PLAAT3	phospholipase A and acyltransferase 3
chr11	63871987	63873367	*	+ 2 fold & sig. in E2	E2 vs DMSO	1.87296824728163	4.39944702750064e-07	Intron (ENST00000377810.8/2011, intron 1 of 17)	2711	ENSG00000072518	MARK2	microtubule affinity regulating kinase 2
chr11	64165918	64166714	*	+ 2 fold & sig. in E2	E2 vs DMSO	1.15335394222389	0.0301061213714168	Promoter	0	ENSG00000133315	MACROD1	mono-ADP ribosylhydrolase 1
chr11	64359173	64359991	*	+ 2 fold & sig. in E2	E2 vs DMSO	1.52184097784291	0.0142293706708942	Promoter	0	ENSG00000162302	RPS6KA4	ribosomal protein S6 kinase A4
chr11	64695799	64696592	*	+ 2 fold & sig. in E2	E2 vs DMSO	1.81651635886642	0.00218869740477244	Intron (ENST00000704782.1/9379, intron 2 of 21)	-5362	ENSG00000110076	NRXN2	neurexin 2
chr11	647367	648544	*	+ 2 fold & sig. in E2	E2 vs DMSO	2.97344032307937	1.83093740323043e-08	Promoter	-771	ENSG00000177030	DEAF1	DEAF1 transcription factor
chr11	64844298	64845177	*	+ 2 fold & sig. in E2	E2 vs DMSO	1.67043825729553	0.00988367215427206	Promoter	0	ENSG00000171219	CDC42BPG	CDC42 binding protein kinase gamma
chr11	64876590	64877599	*	+ 2 fold & sig. in E2	E2 vs DMSO	1.08876753553909	0.000507965394687182	Promoter	318	ENSG00000110047	EHD1	EH domain containing 1
chr11	64878376	64879000	*	+ 2 fold & sig. in E2	E2 vs DMSO	1.42483763461772	0.00128780073403528	Promoter	0	ENSG00000110047	EHD1	EH domain containing 1
chr11	65379594	65380400	*	+ 2 fold & sig. in E2	E2 vs DMSO	1.94808514162297	1.2048295876575e-07	5' UTR	589	ENSG00000162241	SLC25A45	solute carrier family 25 member 45
chr11	65539881	65541165	*	+ 2 fold & sig. in E2	E2 vs DMSO	1.1319776340524	0.00695999425000627	Promoter	0	ENSG00000168056	LTBP3	latent transforming growth factor beta binding protein 3
chr11	66124501	66125252	*	+ 2 fold & sig. in E2	E2 vs DMSO	1.96382877805209	4.33205866413781e-06	Intron (ENST00000320580.9/55690, intron 1 of 23)	23738	ENSG00000175115	PACS1	phosphofurin acidic cluster sorting protein 1
chr11	66137307	66138064	*	+ 2 fold & sig. in E2	E2 vs DMSO	2.54978874176811	4.37357346603954e-10	Intron (ENST00000320580.9/55690, intron 1 of 23)	36544	ENSG00000175115	PACS1	phosphofurin acidic cluster sorting protein 1
chr11	66996879	66997592	*	+ 2 fold & sig. in E2	E2 vs DMSO	1.24076665810371	0.0202456827122472	Distal Intergenic	-9186	ENSG00000173227	SYT12	synaptotagmin 12
chr11	67022215	67022983	*	+ 2 fold & sig. in E2	E2 vs DMSO	2.27860272064659	1.31450117401208e-08	Promoter	0	ENSG00000173227	SYT12	synaptotagmin 12
chr11	67302732	67304382	*	+ 2 fold & sig. in E2	E2 vs DMSO	1.93871422285581	8.6460943632274e-06	Promoter	0	ENSG00000172830	SSH3	slingshot protein phosphatase 3
chr11	67507851	67508764	*	+ 2 fold & sig. in E2	E2 vs DMSO	1.0069917048259	0.00160646997881993	Promoter	0	ENSG00000167797	CDK2AP2	cyclin dependent kinase 2 associated protein 2
chr11	67548462	67549334	*	+ 2 fold & sig. in E2	E2 vs DMSO	2.21931639860932	7.00023956710654e-07	Distal Intergenic	-23945	ENSG00000167791	CABP2	calcium binding protein 2
chr11	67629297	67630986	*	+ 2 fold & sig. in E2	E2 vs DMSO	1.12854196734308	0.00218295530688808	Promoter	0	ENSG00000167799	NUDT8	nudix hydrolase 8
chr11	68037938	68039107	*	+ 2 fold & sig. in E2	E2 vs DMSO	1.89542821302469	2.65573854702072e-08	Promoter	0	ENSG00000110719	TCIRG1	T cell immune regulator 1, ATPase H+ transporting V0 subunit a3
chr11	68818140	68818539	*	+ 2 fold & sig. in E2	E2 vs DMSO	2.35019561939951	6.80132964685036e-07	Promoter	153	ENSG00000110090	CPT1A	carnitine palmitoyltransferase 1A
chr11	68819213	68820151	*	+ 2 fold & sig. in E2	E2 vs DMSO	2.53644715364996	6.04532410096182e-12	Promoter	-521	ENSG00000110090	CPT1A	carnitine palmitoyltransferase 1A
chr11	68825453	68826185	*	+ 2 fold & sig. in E2	E2 vs DMSO	1.01350527286051	0.0179580485973783	Intron (ENST00000376618.6/1374, intron 1 of 18)	-6761	ENSG00000110090	CPT1A	carnitine palmitoyltransferase 1A
chr11	68843749	68844343	*	+ 2 fold & sig. in E2	E2 vs DMSO	1.29831572497091	0.00566320558842908	Promoter	67	ENSG00000110090	CPT1A	carnitine palmitoyltransferase 1A
chr11	69010324	69011255	*	+ 2 fold & sig. in E2	E2 vs DMSO	2.64586332114148	2.4490082027151e-08	Intron (ENST00000441623.1/116535, intron 1 of 2)	-1028	ENSG00000256508	MRGPRF-AS1	MRGPRF antisense RNA 1
chr11	69101297	69101926	*	+ 2 fold & sig. in E2	E2 vs DMSO	1.33503610400959	9.05787530445683e-05	Intron (ENST00000637504.1/219931, intron 19 of 19)	18121	ENSG00000265539	MIR3164	microRNA 3164
chr11	69105836	69107071	*	+ 2 fold & sig. in E2	E2 vs DMSO	1.64426512868137	9.9951847810028e-08	Intron (ENST00000637504.1/219931, intron 19 of 19)	22660	ENSG00000265539	MIR3164	microRNA 3164
chr11	69114769	69116188	*	+ 2 fold & sig. in E2	E2 vs DMSO	1.39914446882122	3.35857686308453e-06	Intron (ENST00000637504.1/219931, intron 19 of 19)	31593	ENSG00000265539	MIR3164	microRNA 3164
chr11	69263556	69264385	*	+ 2 fold & sig. in E2	E2 vs DMSO	1.50972334249383	0.00258216926448515	Distal Intergenic	-29766	ENSG00000172927	MYEOV	myeloma overexpressed
chr11	69298502	69298996	*	+ 2 fold & sig. in E2	E2 vs DMSO	2.28798638799843	3.53529198457396e-09	Promoter	-278	NA	LOC105369370	uncharacterized LOC105369370
chr11	69312590	69313271	*	+ 2 fold & sig. in E2	E2 vs DMSO	1.53072021008893	0.000443170273409808	Intron (ENST00000544008.1/26579, intron 1 of 1)	13316	NA	LOC105369370	uncharacterized LOC105369370
chr11	69368200	69368942	*	+ 2 fold & sig. in E2	E2 vs DMSO	1.81224637520951	0.000639624508030252	Intron (ENST00000561588.3/105369370, intron 1 of 2)	26644	NA	LOC105369370	uncharacterized LOC105369370
chr11	69417685	69417973	*	+ 2 fold & sig. in E2	E2 vs DMSO	3.12888074909545	0.0173507843358636	Distal Intergenic	-7705	ENSG00000255980	LOC102724265	uncharacterized LOC102724265
chr11	69479515	69481094	*	+ 2 fold & sig. in E2	E2 vs DMSO	2.15273859893204	7.94275985860105e-11	Promoter	0	ENSG00000255774	LINC02747	long intergenic non-protein coding RNA 2747
chr11	69485444	69485758	*	+ 2 fold & sig. in E2	E2 vs DMSO	1.71674219886871	0.0141789435100764	Promoter	0	NA	LINC01488	long intergenic non-protein coding RNA 1488
chr11	695054	695860	*	+ 2 fold & sig. in E2	E2 vs DMSO	1.05555005469762	0.00325668824202408	Promoter	0	ENSG00000177030	DEAF1	DEAF1 transcription factor
chr11	69510827	69511059	*	+ 2 fold & sig. in E2	E2 vs DMSO	2.71802981122074	1.53031390173554e-08	Distal Intergenic	25216	NA	LINC01488	long intergenic non-protein coding RNA 1488
chr11	69524327	69525343	*	+ 2 fold & sig. in E2	E2 vs DMSO	3.78750550864822	2.44092332964939e-15	Distal Intergenic	38716	NA	LINC01488	long intergenic non-protein coding RNA 1488
chr11	69530066	69530736	*	+ 2 fold & sig. in E2	E2 vs DMSO	2.69258373279221	8.10879581391307e-07	Distal Intergenic	44455	NA	LINC01488	long intergenic non-protein coding RNA 1488
chr11	69541524	69542220	*	+ 2 fold & sig. in E2	E2 vs DMSO	3.96297447479995	1.67170990631871e-10	Distal Intergenic	55913	NA	LINC01488	long intergenic non-protein coding RNA 1488
chr11	69554737	69555462	*	+ 2 fold & sig. in E2	E2 vs DMSO	3.45340354423865	2.98244287135039e-09	Distal Intergenic	69126	NA	LINC01488	long intergenic non-protein coding RNA 1488
chr11	69603824	69604775	*	+ 2 fold & sig. in E2	E2 vs DMSO	3.08574939619545	1.42981435806731e-07	Distal Intergenic	-36381	ENSG00000110092	CCND1	cyclin D1
chr11	69638210	69638648	*	+ 2 fold & sig. in E2	E2 vs DMSO	3.14025232903468	1.23512933049671e-06	Distal Intergenic	-2508	ENSG00000110092	CCND1	cyclin D1
chr11	69638871	69639444	*	+ 2 fold & sig. in E2	E2 vs DMSO	3.29180100487501	8.53600962100012e-11	Distal Intergenic	-1712	ENSG00000110092	CCND1	cyclin D1
chr11	69640795	69641542	*	+ 2 fold & sig. in E2	E2 vs DMSO	1.79017286366681	4.30024937610536e-07	Promoter	0	ENSG00000110092	CCND1	cyclin D1
chr11	69644018	69644848	*	+ 2 fold & sig. in E2	E2 vs DMSO	1.34103318596966	2.9737658461108e-05	Promoter	306	ENSG00000110092	CCND1	cyclin D1
chr11	69674363	69675725	*	+ 2 fold & sig. in E2	E2 vs DMSO	1.48677419372737	8.14153843567785e-05	Promoter	0	ENSG00000149716	LTO1	LTO1 maturation factor of ABCE1
chr11	69685775	69686295	*	+ 2 fold & sig. in E2	E2 vs DMSO	2.23706479133372	0.000391121604072184	Distal Intergenic	-10359	ENSG00000149716	LTO1	LTO1 maturation factor of ABCE1
chr11	69808626	69809383	*	+ 2 fold & sig. in E2	E2 vs DMSO	3.47560544838339	1.20509314430167e-07	Distal Intergenic	8167	ENSG00000186895	FGF3	fibroblast growth factor 3
chr11	69906349	69906902	*	+ 2 fold & sig. in E2	E2 vs DMSO	3.11315085108859	1.73676249824143e-09	Distal Intergenic	-78974	ENSG00000131620	ANO1	anoctamin 1
chr11	69914267	69915829	*	+ 2 fold & sig. in E2	E2 vs DMSO	1.06928354193478	0.000157382389192363	Distal Intergenic	-70047	ENSG00000131620	ANO1	anoctamin 1
chr11	69918372	69918692	*	+ 2 fold & sig. in E2	E2 vs DMSO	1.21559887654226	0.0404808370364018	Distal Intergenic	-67184	ENSG00000131620	ANO1	anoctamin 1
chr11	69948133	69949872	*	+ 2 fold & sig. in E2	E2 vs DMSO	1.12152849130799	0.00015625922314945	Distal Intergenic	-36004	ENSG00000131620	ANO1	anoctamin 1
chr11	70104508	70104916	*	+ 2 fold & sig. in E2	E2 vs DMSO	2.54206824515919	8.43719620520291e-06	Promoter	379	ENSG00000131620	ANO1	anoctamin 1
chr11	70105978	70106854	*	+ 2 fold & sig. in E2	E2 vs DMSO	4.18444081811797	1.18328569723777e-14	Intron (ENST00000531349.6/55107, intron 6 of 27)	-1331	ENSG00000131620	ANO1	anoctamin 1
chr11	70111573	70112318	*	+ 2 fold & sig. in E2	E2 vs DMSO	1.31308215657855	0.0114848410851464	Exon (ENST00000531349.6/55107, exon 9 of 28)	3388	ENSG00000131620	ANO1	anoctamin 1
chr11	70116329	70117009	*	+ 2 fold & sig. in E2	E2 vs DMSO	1.33371729597563	0.0211675933152376	Exon (ENST00000531349.6/55107, exon 10 of 28)	8144	ENSG00000131620	ANO1	anoctamin 1
chr11	70202906	70204257	*	+ 2 fold & sig. in E2	E2 vs DMSO	2.94638742239094	3.31543262489462e-10	Promoter	0	ENSG00000168040	FADD	Fas associated via death domain
chr11	70247464	70248315	*	+ 2 fold & sig. in E2	E2 vs DMSO	1.46583351927871	0.000184106984435472	Distal Intergenic	-22375	ENSG00000131626	PPFIA1	PTPRF interacting protein alpha 1
chr11	70269919	70270849	*	+ 2 fold & sig. in E2	E2 vs DMSO	2.08931866746601	9.53370906996331e-07	Promoter	0	ENSG00000131626	PPFIA1	PTPRF interacting protein alpha 1
chr11	70306412	70307098	*	+ 2 fold & sig. in E2	E2 vs DMSO	1.60940930363882	0.00426223967421773	Intron (ENST00000253925.12/8500, intron 2 of 27)	-19246	ENSG00000131626	PPFIA1	PTPRF interacting protein alpha 1
chr11	70745613	70746414	*	+ 2 fold & sig. in E2	E2 vs DMSO	1.15345122398355	0.00993804269856787	Intron (ENST00000601538.6/22941, intron 14 of 25)	-27610	ENSG00000162105	SHANK2	SH3 and multiple ankyrin repeat domains 2
chr11	70935176	70935787	*	+ 2 fold & sig. in E2	E2 vs DMSO	1.2497729683746	0.0393583857703464	Intron (ENST00000601538.6/22941, intron 10 of 25)	15284	ENSG00000162105	SHANK2	SH3 and multiple ankyrin repeat domains 2
chr11	71251744	71253990	*	+ 2 fold & sig. in E2	E2 vs DMSO	1.37196978502704	0.000207955351781089	Promoter	0	ENSG00000162105	SHANK2	SH3 and multiple ankyrin repeat domains 2
chr11	71298867	71299949	*	+ 2 fold & sig. in E2	E2 vs DMSO	1.0669443529377	0.000771471595414799	Distal Intergenic	-46290	ENSG00000162105	SHANK2	SH3 and multiple ankyrin repeat domains 2
chr11	71447499	71449294	*	+ 2 fold & sig. in E2	E2 vs DMSO	3.2461640586801	3.74222489996222e-14	Promoter	0	ENSG00000172893	DHCR7	7-dehydrocholesterol reductase
chr11	71452698	71454332	*	+ 2 fold & sig. in E2	E2 vs DMSO	2.9315241601143	5.62708112442681e-13	Promoter	0	ENSG00000172893	DHCR7	7-dehydrocholesterol reductase
chr11	71477646	71478022	*	+ 2 fold & sig. in E2	E2 vs DMSO	2.58380256923675	2.80778325406004e-09	Promoter	-373	ENSG00000172890	NADSYN1	NAD synthetase 1
chr11	71487940	71489112	*	+ 2 fold & sig. in E2	E2 vs DMSO	1.73361848643391	1.48273867478644e-07	Intron (ENST00000319023.7/55191, intron 16 of 20)	5217	ENSG00000172890	NADSYN1	NAD synthetase 1
chr11	71500127	71501433	*	+ 2 fold & sig. in E2	E2 vs DMSO	3.0857935575205	9.3043597413919e-13	3' UTR	1725	ENSG00000172890	NADSYN1	NAD synthetase 1
chr11	71579437	71580407	*	+ 2 fold & sig. in E2	E2 vs DMSO	1.20629206233082	0.0104123295158904	Exon (ENST00000502328.1/ENST00000502328.1, exon 1 of 1)	2468	ENSG00000204571	KRTAP5-11	keratin associated protein 5-11
chr11	71867230	71867602	*	+ 2 fold & sig. in E2	E2 vs DMSO	6.3868860966593	0.0328425179475158	Intron (ENST00000696863.1/122319435, intron 4 of 10)	-10851	ENSG00000225805	DEFB131B	defensin beta 131B
chr11	72397884	72398826	*	+ 2 fold & sig. in E2	E2 vs DMSO	1.9093826948723	1.24513424420574e-07	Intron (ENST00000294053.9/81570, intron 3 of 16)	-17558	ENSG00000162129	CLPB	caseinolytic mitochondrial matrix peptidase chaperone subunit B
chr11	72752270	72753075	*	+ 2 fold & sig. in E2	E2 vs DMSO	1.12585943524449	0.00103882695032703	Promoter	0	ENSG00000186635	ARAP1	ArfGAP with RhoGAP domain, ankyrin repeat and PH domain 1
chr11	72772934	72773502	*	+ 2 fold & sig. in E2	E2 vs DMSO	1.94487819426999	4.74888154742821e-05	Intron (ENST00000359373.9/116985, intron 1 of 33)	7614	ENSG00000214530	STARD10	StAR related lipid transfer domain containing 10
chr11	72777746	72778392	*	+ 2 fold & sig. in E2	E2 vs DMSO	2.20958826094198	7.90821219052966e-09	Intron (ENST00000359373.9/116985, intron 1 of 33)	2724	ENSG00000214530	STARD10	StAR related lipid transfer domain containing 10
chr11	72812799	72813623	*	+ 2 fold & sig. in E2	E2 vs DMSO	1.60330755933791	1.52547447280842e-05	Promoter	431	NA	LOC107984421	uncharacterized LOC107984421
chr11	72813700	72815198	*	+ 2 fold & sig. in E2	E2 vs DMSO	1.48233347942016	4.39137784637476e-06	Promoter	0	NA	LOC107984421	uncharacterized LOC107984421
chr11	72821884	72822675	*	+ 2 fold & sig. in E2	E2 vs DMSO	1.63351198768149	0.00049485091889614	Promoter	0	ENSG00000168010	ATG16L2	autophagy related 16 like 2
chr11	72823670	72824184	*	+ 2 fold & sig. in E2	E2 vs DMSO	1.05405818629097	0.0351718456855326	Promoter	0	ENSG00000168010	ATG16L2	autophagy related 16 like 2
chr11	73192326	73192736	*	+ 2 fold & sig. in E2	E2 vs DMSO	2.86034515782978	7.16100618165724e-11	Distal Intergenic	-9415	NA	LOC105369381	uncharacterized LOC105369381
chr11	73200144	73200785	*	+ 2 fold & sig. in E2	E2 vs DMSO	2.54104278279727	1.47259185401611e-08	Distal Intergenic	-17233	NA	LOC105369381	uncharacterized LOC105369381
chr11	73217753	73218860	*	+ 2 fold & sig. in E2	E2 vs DMSO	2.49373388796523	3.79068594295353e-09	Promoter	0	NA	NA	NA
chr11	73227413	73228807	*	+ 2 fold & sig. in E2	E2 vs DMSO	2.51781297689397	2.98463520719757e-12	5' UTR	8956	ENSG00000175591	P2RY2	purinergic receptor P2Y2
chr11	73236593	73237313	*	+ 2 fold & sig. in E2	E2 vs DMSO	1.02494791983983	0.0250103054161839	3' UTR	18136	ENSG00000175591	P2RY2	purinergic receptor P2Y2
chr11	74636157	74636981	*	+ 2 fold & sig. in E2	E2 vs DMSO	2.33446325855555	0.00109022117734747	Exon (ENST00000263681.7/10714, exon 11 of 12)	-1633	ENSG00000077514	POLD3	DNA polymerase delta 3, accessory subunit
chr11	74672711	74673617	*	+ 2 fold & sig. in E2	E2 vs DMSO	1.05077134808777	0.0111956596465529	Distal Intergenic	24077	ENSG00000054938	CHRDL2	chordin like 2
chr11	75035874	75036590	*	+ 2 fold & sig. in E2	E2 vs DMSO	2.0544644233869	0.000312795467617404	Distal Intergenic	46930	ENSG00000162139	NEU3	neuraminidase 3
chr11	75333577	75334669	*	+ 2 fold & sig. in E2	E2 vs DMSO	3.53425145318125	7.80702949922244e-14	Intron (ENST00000420843.7/408, intron 1 of 15)	517	ENSG00000199090	MIR326	microRNA 326
chr11	75342563	75343804	*	+ 2 fold & sig. in E2	E2 vs DMSO	1.38759835481511	1.62224463492373e-06	Intron (ENST00000420843.7/408, intron 1 of 15)	-7377	ENSG00000199090	MIR326	microRNA 326
chr11	75349446	75349833	*	+ 2 fold & sig. in E2	E2 vs DMSO	1.7747715803759	1.6260335093785e-05	Intron (ENST00000420843.7/408, intron 1 of 15)	1827	ENSG00000137486	ARRB1	arrestin beta 1
chr11	75350693	75351732	*	+ 2 fold & sig. in E2	E2 vs DMSO	3.24407735781339	2.84116692666036e-13	Promoter	0	ENSG00000137486	ARRB1	arrestin beta 1
chr11	76208729	76209654	*	+ 2 fold & sig. in E2	E2 vs DMSO	1.60042556758121	0.02212548678543	Intron (ENST00000529461.1/7481, intron 1 of 2)	1076	ENSG00000085741	WNT11	Wnt family member 11
chr11	76766188	76766594	*	+ 2 fold & sig. in E2	E2 vs DMSO	2.36497328498217	4.08727451138503e-05	Intron (ENST00000533437.1/ENST00000533437.1, intron 1 of 1)	2028	NA	NA	NA
chr11	76769616	76770032	*	+ 2 fold & sig. in E2	E2 vs DMSO	1.95104374234678	1.43716769439111e-06	Promoter	-994	NA	NA	NA
chr11	76784117	76784745	*	+ 2 fold & sig. in E2	E2 vs DMSO	1.66510596680116	3.46989063314423e-05	Promoter	0	ENSG00000182704	TSKU	tsukushi, small leucine rich proteoglycan
chr11	76919978	76920552	*	+ 2 fold & sig. in E2	E2 vs DMSO	1.14129879429616	0.0190302721520082	Promoter	0	ENSG00000078124	ACER3	alkaline ceramidase 3
chr11	76921433	76921944	*	+ 2 fold & sig. in E2	E2 vs DMSO	1.42755672697926	0.0297111176993082	Intron (ENST00000679754.1/55331, intron 1 of 11)	1354	ENSG00000078124	ACER3	alkaline ceramidase 3
chr11	76939017	76939760	*	+ 2 fold & sig. in E2	E2 vs DMSO	1.99229766610157	0.00297409298534599	Intron (ENST00000679754.1/55331, intron 2 of 11)	18938	ENSG00000078124	ACER3	alkaline ceramidase 3
chr11	77003811	77004384	*	+ 2 fold & sig. in E2	E2 vs DMSO	1.47734003224478	0.00468236487980692	Intron (ENST00000679754.1/55331, intron 7 of 11)	5257	ENSG00000078124	ACER3	alkaline ceramidase 3
chr11	77015542	77016070	*	+ 2 fold & sig. in E2	E2 vs DMSO	2.05769525694411	2.66841966736895e-05	Promoter	0	ENSG00000078124	ACER3	alkaline ceramidase 3
chr11	77029658	77030391	*	+ 2 fold & sig. in E2	E2 vs DMSO	1.58791169926019	9.33214206363844e-05	Distal Intergenic	-4007	ENSG00000198488	B3GNT6	UDP-GlcNAc:betaGal beta-1,3-N-acetylglucosaminyltransferase 6
chr11	77038349	77039139	*	+ 2 fold & sig. in E2	E2 vs DMSO	3.68276094534073	6.36449574204751e-15	Intron (ENST00000528622.5/192134, intron 2 of 2)	3951	ENSG00000198488	B3GNT6	UDP-GlcNAc:betaGal beta-1,3-N-acetylglucosaminyltransferase 6
chr11	77066455	77067171	*	+ 2 fold & sig. in E2	E2 vs DMSO	1.4862276391455	0.0134670195125622	Promoter	0	ENSG00000149260	CAPN5	calpain 5
chr11	77191387	77192526	*	+ 2 fold & sig. in E2	E2 vs DMSO	1.1551229527326	0.00171853569340954	Exon (ENST00000409709.9/4647, exon 31 of 49)	6701	ENSG00000137474	MYO7A	myosin VIIA
chr11	77407563	77408154	*	+ 2 fold & sig. in E2	E2 vs DMSO	1.90110677850622	0.0140168750399567	5' UTR	3750	ENSG00000149269	PAK1	p21 (RAC1) activated kinase 1
chr11	78150328	78151301	*	+ 2 fold & sig. in E2	E2 vs DMSO	2.48171171834955	4.21880161531511e-08	Intron (ENST00000701360.1/100289388, intron 2 of 2)	10385	ENSG00000246174	KCTD21-AS1	KCTD21 antisense RNA 1
chr11	78187857	78189080	*	+ 2 fold & sig. in E2	E2 vs DMSO	1.92180518158072	2.29422585955544e-07	Promoter	0	ENSG00000188997	KCTD21	potassium channel tetramerization domain containing 21
chr11	78311646	78312482	*	+ 2 fold & sig. in E2	E2 vs DMSO	5.21351278654234	5.43000858242877e-13	Intron (ENST00000361507.5/9846, intron 1 of 9)	-2314	NA	LOC105369402	uncharacterized LOC105369402
chr11	78396570	78396944	*	+ 2 fold & sig. in E2	E2 vs DMSO	7.64461324528237	0.00146018305455388	Intron (ENST00000534168.1/ENST00000534168.1, intron 1 of 1)	20827	ENSG00000033327	GAB2	GRB2 associated binding protein 2
chr11	78416762	78417378	*	+ 2 fold & sig. in E2	E2 vs DMSO	3.83167964617751	1.33618506096029e-08	Promoter	393	ENSG00000033327	GAB2	GRB2 associated binding protein 2
chr11	78848689	78849428	*	+ 2 fold & sig. in E2	E2 vs DMSO	3.47521089386082	7.32283117428455e-05	Intron (ENST00000278550.12/26011, intron 12 of 33)	-43278	ENSG00000149256	TENM4	teneurin transmembrane protein 4
chr11	79353697	79354190	*	+ 2 fold & sig. in E2	E2 vs DMSO	2.95118183025246	0.0228218017029618	Intron (ENST00000278550.12/26011, intron 1 of 33)	47919	ENSG00000211997	MIR708	microRNA 708
chr11	80436065	80437087	*	+ 2 fold & sig. in E2	E2 vs DMSO	3.0584898359889	1.05379055971149e-11	Distal Intergenic	325739	ENSG00000255178	LINC02720	long intergenic non-protein coding RNA 2720
chr11	80693561	80694559	*	+ 2 fold & sig. in E2	E2 vs DMSO	1.18950998285177	0.0184319708399755	Distal Intergenic	68267	ENSG00000255178	LINC02720	long intergenic non-protein coding RNA 2720
chr11	82997122	82997945	*	+ 2 fold & sig. in E2	E2 vs DMSO	1.3789374977051	0.00216032720074327	Promoter	0	ENSG00000137502	RAB30	RAB30, member RAS oncogene family
chr11	84607911	84609134	*	+ 2 fold & sig. in E2	E2 vs DMSO	1.95676045356874	5.12255296424048e-07	Intron (ENST00000398309.6/1740, intron 1 of 22)	111447	ENSG00000150672	DLG2	discs large MAGUK scaffold protein 2
chr11	86497090	86497583	*	+ 2 fold & sig. in E2	E2 vs DMSO	1.79882300357221	0.00968284137426427	Intron (ENST00000524610.1/ENST00000524610.1, intron 2 of 2)	541	ENSG00000151376	ME3	malic enzyme 3
chr11	86499393	86500356	*	+ 2 fold & sig. in E2	E2 vs DMSO	1.7182174019648	3.79284390906682e-06	Intron (ENST00000524610.1/ENST00000524610.1, intron 2 of 2)	-1269	ENSG00000151376	ME3	malic enzyme 3
chr11	86632727	86633381	*	+ 2 fold & sig. in E2	E2 vs DMSO	1.7849999552137	0.0183309574838755	Intron (ENST00000393324.7/10873, intron 1 of 13)	38441	ENSG00000151376	ME3	malic enzyme 3
chr11	86671120	86672252	*	+ 2 fold & sig. in E2	E2 vs DMSO	3.32960058639471	9.24465702844768e-08	Promoter	0	ENSG00000151376	ME3	malic enzyme 3
chr11	86735514	86736915	*	+ 2 fold & sig. in E2	E2 vs DMSO	2.17909934645277	0.000154781856097942	Promoter	0	NA	LOC102724775	uncharacterized LOC102724775
chr11	86776008	86776803	*	+ 2 fold & sig. in E2	E2 vs DMSO	3.13745266811212	7.18350233288347e-10	Distal Intergenic	-14256	ENSG00000150687	PRSS23	serine protease 23
chr11	86795539	86796443	*	+ 2 fold & sig. in E2	E2 vs DMSO	3.33271558717702	2.68250401193538e-10	Intron (ENST00000527521.1/11098, intron 1 of 1)	-4078	ENSG00000150687	PRSS23	serine protease 23
chr11	86799980	86800572	*	+ 2 fold & sig. in E2	E2 vs DMSO	3.73095275532953	0.000277506802178841	Promoter	0	ENSG00000150687	PRSS23	serine protease 23
chr11	9083888	9084420	*	+ 2 fold & sig. in E2	E2 vs DMSO	1.75022124470506	0.0171838999719039	Intron (ENST00000649792.2/57758, intron 2 of 22)	5959	ENSG00000264984	MIR5691	microRNA 5691
chr11	9089086	9090140	*	+ 2 fold & sig. in E2	E2 vs DMSO	2.5389020074092	5.12136147488658e-09	Promoter	239	ENSG00000264984	MIR5691	microRNA 5691
chr11	9091702	9092361	*	+ 2 fold & sig. in E2	E2 vs DMSO	3.95543467545135	1.54936548593351e-08	Promoter	-101	ENSG00000175356	SCUBE2	signal peptide, CUB domain and EGF like domain containing 2
chr11	9103349	9104109	*	+ 2 fold & sig. in E2	E2 vs DMSO	1.35432538925637	0.000993161504861238	Intron (ENST00000534295.1/57758, intron 2 of 3)	8972	ENSG00000213538	KRT8P41	keratin 8 pseudogene 41
chr11	91595971	91596880	*	+ 2 fold & sig. in E2	E2 vs DMSO	3.29261228751098	0.00810796676114544	Distal Intergenic	-197439	NA	LINC02756	long intergenic non-protein coding RNA 2756
chr11	93650421	93650891	*	+ 2 fold & sig. in E2	E2 vs DMSO	3.13380331935866	0.0148699251834476	Distal Intergenic	-10791	ENSG00000166004	CEP295	centrosomal protein 295
chr11	94196199	94196973	*	+ 2 fold & sig. in E2	E2 vs DMSO	2.34126319392628	0.000537119649969585	Intron (ENST00000655054.1/105369435, intron 2 of 2)	-2900	NA	LOC105369435	uncharacterized LOC105369435
chr11	94543716	94544790	*	+ 2 fold & sig. in E2	E2 vs DMSO	4.49643881752277	3.62339577943982e-10	Promoter	0	ENSG00000134627	PIWIL4	piwi like RNA-mediated gene silencing 4
chr11	94737190	94737840	*	+ 2 fold & sig. in E2	E2 vs DMSO	1.97431349193987	0.0095781884705857	Intron (ENST00000299004.13/154810, intron 2 of 4)	2429	ENSG00000255929	PIWIL4-AS1	PIWIL4 antisense RNA 1
chr11	94830753	94831358	*	+ 2 fold & sig. in E2	E2 vs DMSO	2.24482997996796	1.18541408515639e-05	Intron (ENST00000317829.12/154810, intron 4 of 11)	10453	ENSG00000166025	AMOTL1	angiomotin like 1
chr11	94831592	94831891	*	+ 2 fold & sig. in E2	E2 vs DMSO	7.44310506866496	0.00179047911258651	Intron (ENST00000317829.12/154810, intron 5 of 11)	11292	ENSG00000166025	AMOTL1	angiomotin like 1
chr11	94832555	94833248	*	+ 2 fold & sig. in E2	E2 vs DMSO	2.80388509685502	5.01575286296254e-07	Intron (ENST00000317829.12/154810, intron 5 of 11)	12255	ENSG00000166025	AMOTL1	angiomotin like 1
chr11	94837993	94838706	*	+ 2 fold & sig. in E2	E2 vs DMSO	1.12489833790422	0.0107204109732298	Intron (ENST00000317829.12/154810, intron 5 of 11)	17693	ENSG00000166025	AMOTL1	angiomotin like 1
chr11	94845472	94846236	*	+ 2 fold & sig. in E2	E2 vs DMSO	1.44271003382503	0.000311595041520255	Intron (ENST00000317829.12/154810, intron 5 of 11)	-18592	ENSG00000166025	AMOTL1	angiomotin like 1
chr11	95091775	95092531	*	+ 2 fold & sig. in E2	E2 vs DMSO	1.55675037111392	0.0140617531051987	Intron (ENST00000278505.5/23052, intron 1 of 1)	1929	ENSG00000149218	ENDOD1	endonuclease domain containing 1
chr12	100952180	100953069	*	+ 2 fold & sig. in E2	E2 vs DMSO	1.56669333372871	2.30375065455894e-05	Intron (ENST00000549155.6/121601, intron 7 of 10)	-34050	ENSG00000151572	ANO4	anoctamin 4
chr12	100986886	100987234	*	+ 2 fold & sig. in E2	E2 vs DMSO	2.94867575458123	0.034057232181814	Promoter	0	ENSG00000151572	ANO4	anoctamin 4
chr12	100987742	100988633	*	+ 2 fold & sig. in E2	E2 vs DMSO	1.91811654041207	0.00523681312844506	Intron (ENST00000549155.6/121601, intron 10 of 10)	623	ENSG00000151572	ANO4	anoctamin 4
chr12	101608054	101609160	*	+ 2 fold & sig. in E2	E2 vs DMSO	2.14504024022219	1.20362696507502e-05	Intron (ENST00000550514.5/4604, intron 1 of 6)	-8019	ENSG00000196091	MYBPC1	myosin binding protein C1
chr12	101696865	101698852	*	+ 2 fold & sig. in E2	E2 vs DMSO	4.37862486171538	1.53810745875698e-13	Promoter	0	ENSG00000111666	CHPT1	choline phosphotransferase 1
chr12	102948969	102949613	*	+ 2 fold & sig. in E2	E2 vs DMSO	4.31531325511592	4.10782753582605e-05	Intron (ENST00000551337.5/5053, intron 1 of 4)	1232	NA	LOC112267865	uncharacterized LOC112267865
chr12	103503230	103503972	*	+ 2 fold & sig. in E2	E2 vs DMSO	2.04926025143484	0.00795170937309897	Exon (ENST00000551967.1/ENST00000551967.1, exon 1 of 1)	-7252	ENSG00000179088	C12orf42	chromosome 12 open reading frame 42
chr12	103524300	103525052	*	+ 2 fold & sig. in E2	E2 vs DMSO	3.89460563597159	1.685178286681e-09	Intron (ENST00000650784.1/374470, intron 3 of 3)	-22699	ENSG00000257762	LINC02401	long intergenic non-protein coding RNA 2401
chr12	103799443	103800618	*	+ 2 fold & sig. in E2	E2 vs DMSO	2.24903178757632	1.75022434686402e-06	Intron (ENST00000392876.8/51559, intron 4 of 13)	1783	ENSG00000111696	NT5DC3	5'-nucleotidase domain containing 3
chr12	103841212	103842316	*	+ 2 fold & sig. in E2	E2 vs DMSO	3.07313069580224	3.12707940604267e-12	Promoter	0	NA	LOC107984433	uncharacterized LOC107984433
chr12	103851739	103853000	*	+ 2 fold & sig. in E2	E2 vs DMSO	2.46049067937235	9.6698388091942e-07	Intron (ENST00000548527.5/253724, intron 6 of 6)	10288	NA	LOC107984433	uncharacterized LOC107984433
chr12	104296496	104297183	*	+ 2 fold & sig. in E2	E2 vs DMSO	1.66108140998127	0.0161604414388466	Intron (ENST00000525566.6/7296, intron 4 of 16)	-6556	ENSG00000255150	EID3	EP300 interacting inhibitor of differentiation 3
chr12	104656230	104656881	*	+ 2 fold & sig. in E2	E2 vs DMSO	2.24091886958656	1.13497501271357e-05	Intron (ENST00000303694.6/50515, intron 2 of 2)	64597	ENSG00000264295	MIR3922	microRNA 3922
chr12	104669478	104669937	*	+ 2 fold & sig. in E2	E2 vs DMSO	3.16577411892076	0.0138686607787186	Intron (ENST00000303694.6/50515, intron 2 of 2)	77845	ENSG00000264295	MIR3922	microRNA 3922
chr12	104677368	104678208	*	+ 2 fold & sig. in E2	E2 vs DMSO	1.97249947454125	0.0209104606793137	Intron (ENST00000303694.6/50515, intron 2 of 2)	85735	ENSG00000264295	MIR3922	microRNA 3922
chr12	104680273	104680944	*	+ 2 fold & sig. in E2	E2 vs DMSO	1.97969620903281	0.00465991038951707	Intron (ENST00000303694.6/50515, intron 2 of 2)	88640	ENSG00000264295	MIR3922	microRNA 3922
chr12	107843618	107844665	*	+ 2 fold & sig. in E2	E2 vs DMSO	2.15651307146079	0.0102403542410429	Intron (ENST00000651741.1/ENST00000651741.1, intron 2 of 8)	59283	NA	LOC728739	programmed cell death 2 pseudogene
chr12	110023308	110023911	*	+ 2 fold & sig. in E2	E2 vs DMSO	1.80851824528237	0.0324548590217513	Promoter	0	ENSG00000076513	ANKRD13A	ankyrin repeat domain 13A
chr12	110038927	110039846	*	+ 2 fold & sig. in E2	E2 vs DMSO	1.47887878899137	0.00106511405847977	3' UTR	2712	ENSG00000076513	ANKRD13A	ankyrin repeat domain 13A
chr12	110074139	110074772	*	+ 2 fold & sig. in E2	E2 vs DMSO	2.02507369018898	0.0266350782410798	Promoter	-453	ENSG00000174456	C12orf76	chromosome 12 open reading frame 76
chr12	110247161	110248130	*	+ 2 fold & sig. in E2	E2 vs DMSO	1.56520344096904	0.00805782353050613	Distal Intergenic	-32626	ENSG00000174437	ATP2A2	ATPase sarcoplasmic/endoplasmic reticulum Ca2+ transporting 2
chr12	110339183	110340071	*	+ 2 fold & sig. in E2	E2 vs DMSO	1.9652366950741	1.26525707001801e-05	3' UTR	-3185	ENSG00000174437	ATP2A2	ATPase sarcoplasmic/endoplasmic reticulum Ca2+ transporting 2
chr12	110344814	110345773	*	+ 2 fold & sig. in E2	E2 vs DMSO	1.60347617777863	2.95865036957368e-05	Promoter	0	ENSG00000174437	ATP2A2	ATPase sarcoplasmic/endoplasmic reticulum Ca2+ transporting 2
chr12	110563893	110564726	*	+ 2 fold & sig. in E2	E2 vs DMSO	2.35568428007696	0.00532765884185846	Intron (ENST00000354300.5/160760, intron 1 of 5)	-17124	ENSG00000196850	PPTC7	protein phosphatase targeting COQ7
chr12	115101912	115102347	*	+ 2 fold & sig. in E2	E2 vs DMSO	6.81154408584576	0.0116499395088895	Distal Intergenic	364208	NA	NA	NA
chr12	115383479	115384230	*	+ 2 fold & sig. in E2	E2 vs DMSO	1.70140626386538	0.00437169486758031	Distal Intergenic	217491	NA	LOC105370002	uncharacterized LOC105370002
chr12	115397985	115398928	*	+ 2 fold & sig. in E2	E2 vs DMSO	1.4138627282334	0.000259880508460549	Distal Intergenic	202793	NA	LOC105370002	uncharacterized LOC105370002
chr12	115869969	115870788	*	+ 2 fold & sig. in E2	E2 vs DMSO	2.41645227828455	5.44096264894749e-09	Intron (ENST00000546414.1/105370004, intron 1 of 2)	15349	NA	LINC02463	long intergenic non-protein coding RNA 2463
chr12	116015499	116016024	*	+ 2 fold & sig. in E2	E2 vs DMSO	2.329954271704	0.0023854000352529	Intron (ENST00000281928.9/23389, intron 7 of 30)	-4527	ENSG00000123066	MED13L	mediator complex subunit 13L
chr12	116277528	116278030	*	+ 2 fold & sig. in E2	E2 vs DMSO	3.09890602518881	0.000134574480734403	Promoter	0	ENSG00000123066	MED13L	mediator complex subunit 13L
chr12	116320682	116321413	*	+ 2 fold & sig. in E2	E2 vs DMSO	1.73626528891609	0.000470312166148558	Distal Intergenic	-42989	ENSG00000123066	MED13L	mediator complex subunit 13L
chr12	116336444	116337210	*	+ 2 fold & sig. in E2	E2 vs DMSO	1.92384754982004	1.58442708750554e-05	Distal Intergenic	-58751	ENSG00000123066	MED13L	mediator complex subunit 13L
chr12	116494215	116494670	*	+ 2 fold & sig. in E2	E2 vs DMSO	3.36277841986172	8.76351262628384e-13	Intron (ENST00000659057.1/107984439, intron 1 of 2)	12142	NA	LINC02457	long intergenic non-protein coding RNA 2457
chr12	116528054	116528493	*	+ 2 fold & sig. in E2	E2 vs DMSO	1.06200300302919	0.0381316025372474	Distal Intergenic	-4929	ENSG00000196668	LINC00173	long intergenic non-protein coding RNA 173
chr12	116534423	116535014	*	+ 2 fold & sig. in E2	E2 vs DMSO	1.30406646325472	0.00104333060934084	Promoter	-409	ENSG00000196668	LINC00173	long intergenic non-protein coding RNA 173
chr12	116551798	116552276	*	+ 2 fold & sig. in E2	E2 vs DMSO	1.93418981937657	0.0460206517569048	Intron (ENST00000547114.3/ENST00000547114.3, intron 3 of 3)	1056	ENSG00000258102	MAP1LC3B2	microtubule associated protein 1 light chain 3 beta 2
chr12	116601738	116602367	*	+ 2 fold & sig. in E2	E2 vs DMSO	1.86569356563092	0.000307898129388974	Intron (ENST00000550742.1/ENST00000550742.1, intron 1 of 1)	42357	ENSG00000258102	MAP1LC3B2	microtubule associated protein 1 light chain 3 beta 2
chr12	116655783	116656060	*	+ 2 fold & sig. in E2	E2 vs DMSO	6.10287433792439	0.0443911427441169	Distal Intergenic	-5522	NA	NA	NA
chr12	117062497	117063237	*	+ 2 fold & sig. in E2	E2 vs DMSO	1.09880179373252	0.0101289647589086	Intron (ENST00000335209.12/54997, intron 2 of 7)	-8502	ENSG00000088992	TESC	tescalcin
chr12	117240421	117240710	*	+ 2 fold & sig. in E2	E2 vs DMSO	6.20028695460025	0.0408271818502237	Intron (ENST00000317775.11/4842, intron 20 of 28)	-49951	ENSG00000135108	FBXO21	F-box protein 21
chr12	117883784	117884413	*	+ 2 fold & sig. in E2	E2 vs DMSO	2.98051045320277	1.57201861683646e-06	Intron (ENST00000425217.5/283455, intron 1 of 19)	83810	ENSG00000171435	KSR2	kinase suppressor of ras 2
chr12	117906901	117907744	*	+ 2 fold & sig. in E2	E2 vs DMSO	2.66255945140622	7.41369848972843e-10	Intron (ENST00000425217.5/283455, intron 1 of 19)	60479	ENSG00000171435	KSR2	kinase suppressor of ras 2
chr12	117968878	117969727	*	+ 2 fold & sig. in E2	E2 vs DMSO	1.32350680219453	0.0185653153806048	Promoter	0	ENSG00000171435	KSR2	kinase suppressor of ras 2
chr12	118016384	118017239	*	+ 2 fold & sig. in E2	E2 vs DMSO	1.47494059963202	0.0388341812829327	Promoter	0	ENSG00000111445	RFC5	replication factor C subunit 5
chr12	118364332	118364691	*	+ 2 fold & sig. in E2	E2 vs DMSO	6.09873848047881	0.0461687390216952	Intron (ENST00000392533.8/51347, intron 1 of 20)	-4612	ENSG00000135090	TAOK3	TAO kinase 3
chr12	119171105	119171891	*	+ 2 fold & sig. in E2	E2 vs DMSO	3.41219694283222	4.62926365165641e-11	Exon (ENST00000676008.1/ENST00000676008.1, exon 1 of 3)	-2035	ENSG00000152137	HSPB8	heat shock protein family B (small) member 8
chr12	119178417	119179108	*	+ 2 fold & sig. in E2	E2 vs DMSO	1.52421762444561	0.00433887141386089	Promoter	0	ENSG00000152137	HSPB8	heat shock protein family B (small) member 8
chr12	119179308	119179938	*	+ 2 fold & sig. in E2	E2 vs DMSO	2.13168418940133	0.0177990729684809	Promoter	0	NA	LOC105370026	uncharacterized LOC105370026
chr12	119932148	119932770	*	+ 2 fold & sig. in E2	E2 vs DMSO	2.44542785318284	0.0217201902383221	Distal Intergenic	-54828	ENSG00000122966	CIT	citron rho-interacting serine/threonine kinase
chr12	120116657	120117516	*	+ 2 fold & sig. in E2	E2 vs DMSO	1.73521526880501	0.0128400290674719	Promoter	0	ENSG00000111737	RAB35	RAB35, member RAS oncogene family
chr12	120161965	120162639	*	+ 2 fold & sig. in E2	E2 vs DMSO	1.34808636967547	0.0276162392432224	Promoter	0	ENSG00000089154	GCN1	GCN1 activator of EIF2AK4
chr12	121124294	121124886	*	+ 2 fold & sig. in E2	E2 vs DMSO	1.6680495874321	0.00116879111607936	Distal Intergenic	-7933	ENSG00000089041	P2RX7	purinergic receptor P2X 7
chr12	121127658	121127955	*	+ 2 fold & sig. in E2	E2 vs DMSO	1.33261720387889	0.0248709408697244	Distal Intergenic	-4864	ENSG00000089041	P2RX7	purinergic receptor P2X 7
chr12	121175886	121176368	*	+ 2 fold & sig. in E2	E2 vs DMSO	2.81377170950047	7.35428992369625e-05	Intron (ENST00000537312.5/5027, intron 8 of 10)	-33697	ENSG00000135124	P2RX4	purinergic receptor P2X 4
chr12	121202653	121203884	*	+ 2 fold & sig. in E2	E2 vs DMSO	1.53354706564059	0.000372135645073919	Distal Intergenic	-6181	ENSG00000135124	P2RX4	purinergic receptor P2X 4
chr12	121209794	121210733	*	+ 2 fold & sig. in E2	E2 vs DMSO	1.65426992261457	0.0178131418227833	Promoter	0	ENSG00000135124	P2RX4	purinergic receptor P2X 4
chr12	121709560	121710047	*	+ 2 fold & sig. in E2	E2 vs DMSO	1.23568993751953	0.0191373072900256	Distal Intergenic	-2705	ENSG00000188735	TMEM120B	transmembrane protein 120B
chr12	121712147	121713056	*	+ 2 fold & sig. in E2	E2 vs DMSO	2.15669693977317	2.73717015969483e-07	Promoter	0	ENSG00000188735	TMEM120B	transmembrane protein 120B
chr12	121716922	121717446	*	+ 2 fold & sig. in E2	E2 vs DMSO	2.25842297465867	3.65288627931646e-05	Intron (ENST00000342607.10/144404, intron 1 of 12)	4170	ENSG00000188735	TMEM120B	transmembrane protein 120B
chr12	121791806	121792416	*	+ 2 fold & sig. in E2	E2 vs DMSO	1.52793765109248	1.0283978095099e-05	Intron (ENST00000267205.7/54509, intron 2 of 4)	944	ENSG00000139725	RHOF	ras homolog family member F, filopodia associated
chr12	121792772	121793522	*	+ 2 fold & sig. in E2	E2 vs DMSO	3.37064968344861	6.72596823719418e-11	Promoter	0	ENSG00000139725	RHOF	ras homolog family member F, filopodia associated
chr12	121794082	121794671	*	+ 2 fold & sig. in E2	E2 vs DMSO	1.55027455848679	1.75586966760971e-05	Promoter	0	ENSG00000139725	RHOF	ras homolog family member F, filopodia associated
chr12	121796967	121797572	*	+ 2 fold & sig. in E2	E2 vs DMSO	1.01528057194382	0.00137247473748732	Exon (ENST00000609067.1/ENST00000609067.1, exon 1 of 2)	-2612	ENSG00000139725	RHOF	ras homolog family member F, filopodia associated
chr12	121799773	121800504	*	+ 2 fold & sig. in E2	E2 vs DMSO	1.046267366675	0.0140936421350668	Promoter	173	ENSG00000139725	RHOF	ras homolog family member F, filopodia associated
chr12	122062673	122064212	*	+ 2 fold & sig. in E2	E2 vs DMSO	1.1003288585903	0.00022347472776461	Promoter	0	ENSG00000256546	LOC100506691	uncharacterized LOC100506691
chr12	122078148	122078919	*	+ 2 fold & sig. in E2	E2 vs DMSO	4.52029689975573	7.90021476983803e-08	Promoter	0	ENSG00000175727	MLXIP	MLX interacting protein
chr12	122225538	122226632	*	+ 2 fold & sig. in E2	E2 vs DMSO	1.32713155098019	0.000169833947102954	Promoter	0	ENSG00000184047	DIABLO	diablo IAP-binding mitochondrial protein
chr12	122491888	122492637	*	+ 2 fold & sig. in E2	E2 vs DMSO	1.39222080287803	0.0363526581137861	Exon (ENST00000516383.1/ENST00000516383.1, exon 1 of 1)	6688	ENSG00000033030	ZCCHC8	zinc finger CCHC-type containing 8
chr12	122864348	122864822	*	+ 2 fold & sig. in E2	E2 vs DMSO	1.75352543341445	0.0366566297934574	Distal Intergenic	4183	ENSG00000130787	HIP1R	huntingtin interacting protein 1 related
chr12	123060302	123060636	*	+ 2 fold & sig. in E2	E2 vs DMSO	2.92655910167949	5.77225107067078e-07	Intron (ENST00000280562.9/57605, intron 1 of 24)	15459	ENSG00000090975	PITPNM2	phosphatidylinositol transfer protein membrane associated 2
chr12	123069544	123071150	*	+ 2 fold & sig. in E2	E2 vs DMSO	2.92507408963714	1.03394354990407e-12	Intron (ENST00000280562.9/57605, intron 1 of 24)	4945	ENSG00000090975	PITPNM2	phosphatidylinositol transfer protein membrane associated 2
chr12	123075389	123076377	*	+ 2 fold & sig. in E2	E2 vs DMSO	1.39764747764745	6.26351818693762e-05	Promoter	0	ENSG00000090975	PITPNM2	phosphatidylinositol transfer protein membrane associated 2
chr12	123445480	123446585	*	+ 2 fold & sig. in E2	E2 vs DMSO	1.75466773259842	0.000115373541551845	Distal Intergenic	-8796	ENSG00000150977	RILPL2	Rab interacting lysosomal protein like 2
chr12	123516174	123516911	*	+ 2 fold & sig. in E2	E2 vs DMSO	3.03518147622871	1.13324053143632e-05	Intron (ENST00000376874.9/353116, intron 2 of 6)	-1746	ENSG00000188026	RILPL1	Rab interacting lysosomal protein like 1
chr12	12356676	12357708	*	+ 2 fold & sig. in E2	E2 vs DMSO	3.87252358774649	1.93598482302074e-10	Promoter	0	ENSG00000165714	BORCS5	BLOC-1 related complex subunit 5
chr12	124217512	124218402	*	+ 2 fold & sig. in E2	E2 vs DMSO	1.7085379189469	0.00596233463721361	Intron (ENST00000389727.8/100533183, intron 3 of 4)	-70762	ENSG00000178882	RFLNA	refilin A
chr12	124359485	124360712	*	+ 2 fold & sig. in E2	E2 vs DMSO	1.92687775808392	1.75323003592029e-07	Intron (ENST00000404621.5/9612, intron 22 of 46)	-2635	ENSG00000196498	NCOR2	nuclear receptor corepressor 2
chr12	124369521	124370518	*	+ 2 fold & sig. in E2	E2 vs DMSO	1.37374016344995	0.00452799510716603	Intron (ENST00000404621.5/9612, intron 20 of 46)	-12671	ENSG00000196498	NCOR2	nuclear receptor corepressor 2
chr12	124388918	124389655	*	+ 2 fold & sig. in E2	E2 vs DMSO	3.30303590505386	3.16672567662534e-09	Promoter	-94	ENSG00000196498	NCOR2	nuclear receptor corepressor 2
chr12	124392563	124393688	*	+ 2 fold & sig. in E2	E2 vs DMSO	2.24455818558597	3.02364472328286e-10	Intron (ENST00000404621.5/9612, intron 17 of 46)	-3739	ENSG00000196498	NCOR2	nuclear receptor corepressor 2
chr12	124410326	124411156	*	+ 2 fold & sig. in E2	E2 vs DMSO	4.78319034105777	7.86780069328165e-14	Intron (ENST00000404621.5/9612, intron 14 of 46)	11398	ENSG00000196498	NCOR2	nuclear receptor corepressor 2
chr12	124527716	124528485	*	+ 2 fold & sig. in E2	E2 vs DMSO	2.6374362851661	0.00776840124980622	Intron (ENST00000404621.5/9612, intron 1 of 46)	7118	ENSG00000196498	NCOR2	nuclear receptor corepressor 2
chr12	124544037	124544875	*	+ 2 fold & sig. in E2	E2 vs DMSO	2.399079857827	4.81257823683064e-05	Intron (ENST00000405201.6/9612, intron 1 of 48)	-8434	ENSG00000196498	NCOR2	nuclear receptor corepressor 2
chr12	124566220	124567100	*	+ 2 fold & sig. in E2	E2 vs DMSO	1.13608790788771	0.0321751853175577	Promoter	364	ENSG00000196498	NCOR2	nuclear receptor corepressor 2
chr12	124592429	124592846	*	+ 2 fold & sig. in E2	E2 vs DMSO	6.46522096843881	0.0261216246433675	Distal Intergenic	-24817	ENSG00000196498	NCOR2	nuclear receptor corepressor 2
chr12	124637322	124638206	*	+ 2 fold & sig. in E2	E2 vs DMSO	1.08624472164641	0.033246843241632	Exon (ENST00000623827.1/ENST00000623827.1, exon 1 of 1)	-69710	ENSG00000196498	NCOR2	nuclear receptor corepressor 2
chr12	124679256	124679860	*	+ 2 fold & sig. in E2	E2 vs DMSO	2.15162747532961	6.13840247391944e-06	Distal Intergenic	-62410	NA	NA	NA
chr12	124681347	124682110	*	+ 2 fold & sig. in E2	E2 vs DMSO	1.95148958483891	6.15738228458446e-06	Distal Intergenic	-60160	NA	NA	NA
chr12	124684375	124685072	*	+ 2 fold & sig. in E2	E2 vs DMSO	1.37469082763337	0.001014902067046	Distal Intergenic	-57198	NA	NA	NA
chr12	124685947	124686225	*	+ 2 fold & sig. in E2	E2 vs DMSO	1.60447768887789	0.0376205271448296	Distal Intergenic	-56045	NA	NA	NA
chr12	124690958	124691338	*	+ 2 fold & sig. in E2	E2 vs DMSO	2.90383029762021	0.00307500408263275	Distal Intergenic	-50932	NA	NA	NA
chr12	124699879	124700381	*	+ 2 fold & sig. in E2	E2 vs DMSO	7.88137826178998	0.000348306422477091	Distal Intergenic	-41889	NA	NA	NA
chr12	124705291	124706119	*	+ 2 fold & sig. in E2	E2 vs DMSO	1.16988989691853	0.0448034607760757	Distal Intergenic	-36151	NA	NA	NA
chr12	124720270	124721037	*	+ 2 fold & sig. in E2	E2 vs DMSO	1.519888866886	0.0132161218300897	Distal Intergenic	-21233	NA	NA	NA
chr12	124727356	124727761	*	+ 2 fold & sig. in E2	E2 vs DMSO	2.36597907241665	1.83516404952789e-06	Distal Intergenic	-14509	NA	NA	NA
chr12	124745697	124746404	*	+ 2 fold & sig. in E2	E2 vs DMSO	3.7684330205144	2.2554774612038e-11	Distal Intergenic	3427	NA	NA	NA
chr12	124979647	124980131	*	+ 2 fold & sig. in E2	E2 vs DMSO	2.80656235039244	0.0436342643606692	Intron (ENST00000308736.7/57647, intron 4 of 26)	567	ENSG00000150990	DHX37	DEAH-box helicase 37
chr12	12498970	12499562	*	+ 2 fold & sig. in E2	E2 vs DMSO	6.99719004441328	0.00951274638841522	Intron (ENST00000298573.9/80824, intron 4 of 6)	6625	ENSG00000111266	DUSP16	dual specificity phosphatase 16
chr12	124992940	124993246	*	+ 2 fold & sig. in E2	E2 vs DMSO	2.33794722032932	0.00518920855951604	Promoter	-399	ENSG00000184992	BRI3BP	BRI3 binding protein
chr12	124993383	124994880	*	+ 2 fold & sig. in E2	E2 vs DMSO	3.93007593020448	2.80076511402734e-10	Promoter	0	ENSG00000184992	BRI3BP	BRI3 binding protein
chr12	125049270	125050100	*	+ 2 fold & sig. in E2	E2 vs DMSO	1.86830557594967	1.36967657113554e-06	Distal Intergenic	-15334	ENSG00000081760	AACS	acetoacetyl-CoA synthetase
chr12	12586853	12587443	*	+ 2 fold & sig. in E2	E2 vs DMSO	1.11192727599172	0.00633725902079943	Distal Intergenic	-23990	ENSG00000111266	DUSP16	dual specificity phosphatase 16
chr12	12819640	12820486	*	+ 2 fold & sig. in E2	E2 vs DMSO	2.39488724331776	3.40783544019202e-08	Promoter	0	ENSG00000213782	DDX47	DEAD-box helicase 47
chr12	12890439	12891696	*	+ 2 fold & sig. in E2	E2 vs DMSO	1.86824837679969	9.29676398082433e-09	Promoter	0	ENSG00000013588	GPRC5A	G protein-coupled receptor class C group 5 member A
chr12	130128535	130129169	*	+ 2 fold & sig. in E2	E2 vs DMSO	1.85984467691719	0.0081814801420803	Distal Intergenic	32509	ENSG00000250208	FZD10-AS1	FZD10 antisense divergent transcript
chr12	13041091	13041672	*	+ 2 fold & sig. in E2	E2 vs DMSO	3.14585681335839	3.74719795456716e-05	Distal Intergenic	-2709	ENSG00000084444	FAM234B	family with sequence similarity 234 member B
chr12	13046908	13047568	*	+ 2 fold & sig. in E2	E2 vs DMSO	2.46783033942529	3.61622966451611e-05	Intron (ENST00000197268.13/57613, intron 1 of 12)	2527	ENSG00000084444	FAM234B	family with sequence similarity 234 member B
chr12	13050027	13050566	*	+ 2 fold & sig. in E2	E2 vs DMSO	4.81327246999936	1.09492898111692e-06	Intron (ENST00000197268.13/57613, intron 1 of 12)	5646	ENSG00000084444	FAM234B	family with sequence similarity 234 member B
chr12	130952286	130952775	*	+ 2 fold & sig. in E2	E2 vs DMSO	1.90695042144657	0.0149360802505727	Distal Intergenic	-1132	ENSG00000111452	ADGRD1	adhesion G protein-coupled receptor D1
chr12	130953777	130954545	*	+ 2 fold & sig. in E2	E2 vs DMSO	3.57201995409668	3.93743969354161e-08	Promoter	0	ENSG00000111452	ADGRD1	adhesion G protein-coupled receptor D1
chr12	131068917	131069717	*	+ 2 fold & sig. in E2	E2 vs DMSO	3.45566753352104	2.39846562687153e-12	Promoter	0	ENSG00000111452	ADGRD1	adhesion G protein-coupled receptor D1
chr12	131076407	131076932	*	+ 2 fold & sig. in E2	E2 vs DMSO	1.83537128847831	0.0112699582448492	Promoter	0	ENSG00000111452	ADGRD1	adhesion G protein-coupled receptor D1
chr12	131096891	131097826	*	+ 2 fold & sig. in E2	E2 vs DMSO	1.64892766557676	0.00751360802913866	Intron (ENST00000261654.10/283383, intron 15 of 24)	4979	ENSG00000111452	ADGRD1	adhesion G protein-coupled receptor D1
chr12	131129674	131130417	*	+ 2 fold & sig. in E2	E2 vs DMSO	1.97607900276272	0.00447578950231433	Intron (ENST00000261654.10/283383, intron 20 of 24)	7720	ENSG00000111452	ADGRD1	adhesion G protein-coupled receptor D1
chr12	131205477	131205939	*	+ 2 fold & sig. in E2	E2 vs DMSO	8.36501761058252	1.90990985233611e-05	Intron (ENST00000376678.6/116437, intron 2 of 4)	-1215	ENSG00000204603	LINC01257	long intergenic non-protein coding RNA 1257
chr12	131278561	131279292	*	+ 2 fold & sig. in E2	E2 vs DMSO	3.07068643997836	4.37682451233705e-06	Distal Intergenic	-16230	NA	LOC100128002	uncharacterized LOC100128002
chr12	131284661	131285424	*	+ 2 fold & sig. in E2	E2 vs DMSO	3.08626826870078	9.61381472698614e-08	Distal Intergenic	-10098	NA	LOC100128002	uncharacterized LOC100128002
chr12	131311323	131311990	*	+ 2 fold & sig. in E2	E2 vs DMSO	5.00735195861972	1.77417238955114e-07	Exon (ENST00000666848.1/124903055, exon 2 of 2)	821	NA	NA	NA
chr12	131318555	131319084	*	+ 2 fold & sig. in E2	E2 vs DMSO	4.36078929223438	3.38958683072935e-05	Distal Intergenic	-5744	NA	NA	NA
chr12	131381898	131382426	*	+ 2 fold & sig. in E2	E2 vs DMSO	2.24904882775364	0.000299797476856565	Distal Intergenic	34428	NA	LINC02370	long intergenic non-protein coding RNA 2370
chr12	131382878	131384134	*	+ 2 fold & sig. in E2	E2 vs DMSO	3.78572979909532	4.54698864017042e-10	Distal Intergenic	35408	NA	LINC02370	long intergenic non-protein coding RNA 2370
chr12	131402025	131402917	*	+ 2 fold & sig. in E2	E2 vs DMSO	1.10177786524398	0.00651669749970019	Distal Intergenic	52519	NA	LOC101929974	uncharacterized LOC101929974
chr12	131563727	131564659	*	+ 2 fold & sig. in E2	E2 vs DMSO	2.16519714378884	4.38232238078305e-06	Distal Intergenic	-33833	NA	LOC101929974	uncharacterized LOC101929974
chr12	131564889	131565549	*	+ 2 fold & sig. in E2	E2 vs DMSO	2.06949093369757	0.00100912452598905	Distal Intergenic	-34995	NA	LOC101929974	uncharacterized LOC101929974
chr12	131830252	131831165	*	+ 2 fold & sig. in E2	E2 vs DMSO	1.91708750826665	0.000784298286116257	Intron (ENST00000535004.2/4326, intron 1 of 9)	1757	ENSG00000198598	MMP17	matrix metallopeptidase 17
chr12	131851095	131851650	*	+ 2 fold & sig. in E2	E2 vs DMSO	2.38142527553203	0.000240506861006267	3' UTR	-5770	NA	NA	NA
chr12	131863342	131863794	*	+ 2 fold & sig. in E2	E2 vs DMSO	2.78170091714087	1.79256552492149e-10	Intron (ENST00000542763.2/124903058, intron 2 of 2)	5922	NA	NA	NA
chr12	131865161	131865652	*	+ 2 fold & sig. in E2	E2 vs DMSO	3.69726980495036	3.37641959260522e-14	Distal Intergenic	7741	NA	NA	NA
chr12	131894237	131894764	*	+ 2 fold & sig. in E2	E2 vs DMSO	3.43280939099518	1.0832814573741e-07	Promoter	0	ENSG00000177169	ULK1	unc-51 like autophagy activating kinase 1
chr12	131895799	131896935	*	+ 2 fold & sig. in E2	E2 vs DMSO	2.5278062280752	1.42581234540387e-10	Exon (ENST00000321867.6/8408, exon 3 of 28)	1177	ENSG00000177169	ULK1	unc-51 like autophagy activating kinase 1
chr12	131928615	131929858	*	+ 2 fold & sig. in E2	E2 vs DMSO	2.46921329864199	1.20777420529875e-06	Promoter	0	NA	LOC107984455	uncharacterized LOC107984455
chr12	131949491	131950806	*	+ 2 fold & sig. in E2	E2 vs DMSO	2.4498649162713	5.11489668238327e-05	Promoter	0	ENSG00000183495	EP400	E1A binding protein p400
chr12	132284661	132285578	*	+ 2 fold & sig. in E2	E2 vs DMSO	1.22244289794981	0.00461340794513557	Intron (ENST00000328957.13/50614, intron 2 of 10)	893	ENSG00000182870	GALNT9	polypeptide N-acetylgalactosaminyltransferase 9
chr12	132466364	132467184	*	+ 2 fold & sig. in E2	E2 vs DMSO	2.16591587529978	0.00155036591066682	Distal Intergenic	-22367	ENSG00000112787	FBRSL1	fibrosin like 1
chr12	132471124	132471339	*	+ 2 fold & sig. in E2	E2 vs DMSO	2.85442199178025	0.0330497671128054	Distal Intergenic	-18212	ENSG00000112787	FBRSL1	fibrosin like 1
chr12	14819911	14820397	*	+ 2 fold & sig. in E2	E2 vs DMSO	2.20395220222577	0.0385136821052499	Intron (ENST00000533472.1/144608, intron 1 of 1)	-5729	ENSG00000179256	SMCO3	single-pass membrane protein with coiled-coil domains 3
chr12	14868767	14869581	*	+ 2 fold & sig. in E2	E2 vs DMSO	2.48290796625659	3.42157060343193e-06	Intron (ENST00000533472.1/144608, intron 1 of 1)	14664	ENSG00000111341	MGP	matrix Gla protein
chr12	15183765	15184147	*	+ 2 fold & sig. in E2	E2 vs DMSO	3.00634162927515	0.0244877365186407	Intron (ENST00000256953.6/85004, intron 2 of 4)	31842	ENSG00000255660	RERG-AS1	RERG antisense RNA 1
chr12	15188127	15188670	*	+ 2 fold & sig. in E2	E2 vs DMSO	8.08825533688382	0.000150397875966572	Intron (ENST00000256953.6/85004, intron 2 of 4)	28959	ENSG00000134533	RERG	RAS like estrogen regulated growth inhibitor
chr12	15220954	15221476	*	+ 2 fold & sig. in E2	E2 vs DMSO	2.14780217464142	3.71912436653783e-05	Promoter	0	ENSG00000134533	RERG	RAS like estrogen regulated growth inhibitor
chr12	15222139	15222696	*	+ 2 fold & sig. in E2	E2 vs DMSO	2.43427383276221	5.47278637513389e-05	Promoter	-722	ENSG00000134533	RERG	RAS like estrogen regulated growth inhibitor
chr12	15242945	15244080	*	+ 2 fold & sig. in E2	E2 vs DMSO	1.85940271974641	5.42023043733323e-07	Intron (ENST00000393736.3/105369673, intron 2 of 3)	-21528	ENSG00000134533	RERG	RAS like estrogen regulated growth inhibitor
chr12	15279504	15280127	*	+ 2 fold & sig. in E2	E2 vs DMSO	2.7255132543837	8.8766420130097e-05	Intron (ENST00000393736.3/105369673, intron 2 of 3)	-42130	ENSG00000151490	PTPRO	protein tyrosine phosphatase receptor type O
chr12	15526009	15526402	*	+ 2 fold & sig. in E2	E2 vs DMSO	6.74121040801486	0.0136314523863384	3' UTR	-19942	ENSG00000151490	PTPRO	protein tyrosine phosphatase receptor type O
chr12	15754819	15755436	*	+ 2 fold & sig. in E2	E2 vs DMSO	3.1408256400969	0.000623097231348193	Intron (ENST00000281172.10/2059, intron 1 of 20)	25291	ENSG00000151491	EPS8	epidermal growth factor receptor pathway substrate 8
chr12	16163766	16164445	*	+ 2 fold & sig. in E2	E2 vs DMSO	3.56844009561341	0.00214085607339556	Distal Intergenic	113240	ENSG00000188991	SLC15A5	solute carrier family 15 member 5
chr12	1628969	1629686	*	+ 2 fold & sig. in E2	E2 vs DMSO	2.80768750290378	0.0384950527752091	Promoter	0	ENSG00000111186	WNT5B	Wnt family member 5B
chr12	174657	175027	*	+ 2 fold & sig. in E2	E2 vs DMSO	2.3665815714138	0.0231366784231584	Exon (ENST00000538872.6/440073, exon 14 of 14)	5602	ENSG00000120645	IQSEC3	IQ motif and Sec7 domain ArfGEF 3
chr12	176278	176999	*	+ 2 fold & sig. in E2	E2 vs DMSO	1.79352293016744	0.00163159723620971	3' UTR	5397	NA	LOC105369592	uncharacterized LOC105369592
chr12	1836677	1837471	*	+ 2 fold & sig. in E2	E2 vs DMSO	1.96226260088413	5.16580436665e-07	3' UTR	9114	ENSG00000166159	LRTM2	leucine rich repeats and transmembrane domains 2
chr12	1841369	1841857	*	+ 2 fold & sig. in E2	E2 vs DMSO	2.59932392178364	4.43004965957125e-05	Intron (ENST00000537784.5/93589, intron 3 of 14)	12180	ENSG00000151062	CACNA2D4	calcium voltage-gated channel auxiliary subunit alpha2delta 4
chr12	1859310	1860348	*	+ 2 fold & sig. in E2	E2 vs DMSO	1.29846794811499	0.00715347338888655	3' UTR	-5273	ENSG00000151062	CACNA2D4	calcium voltage-gated channel auxiliary subunit alpha2delta 4
chr12	1931965	1932838	*	+ 2 fold & sig. in E2	E2 vs DMSO	2.48290233769414	3.2219790011639e-07	Intron (ENST00000418006.1/100271702, intron 1 of 1)	3736	ENSG00000235049	LINC00940	long intergenic non-protein coding RNA 940
chr12	24544240	24544716	*	+ 2 fold & sig. in E2	E2 vs DMSO	6.37449138477293	0.0279394918012583	Intron (ENST00000646273.1/6660, intron 1 of 16)	17666	ENSG00000134532	SOX5	SRY-box transcription factor 5
chr12	25518503	25519223	*	+ 2 fold & sig. in E2	E2 vs DMSO	2.50712636142721	9.40633646278342e-07	Exon (ENST00000543629.5/160492, exon 3 of 5)	738	ENSG00000152936	LMNTD1	lamin tail domain containing 1
chr12	26100956	26102083	*	+ 2 fold & sig. in E2	E2 vs DMSO	1.69774592307492	9.16524024460069e-06	Distal Intergenic	-19908	ENSG00000123096	SSPN	sarcospan
chr12	2794684	2795107	*	+ 2 fold & sig. in E2	E2 vs DMSO	1.47666562882215	0.000282627046383963	Promoter	0	ENSG00000004478	FKBP4	FKBP prolyl isomerase 4
chr12	31431204	31431904	*	+ 2 fold & sig. in E2	E2 vs DMSO	2.02899431124096	0.00174830643115092	Intron (ENST00000389082.10/160518, intron 8 of 20)	-4453	ENSG00000170456	DENND5B	DENN domain containing 5B
chr12	31475455	31475993	*	+ 2 fold & sig. in E2	E2 vs DMSO	3.344403094623	1.55420030412948e-06	Intron (ENST00000389082.10/160518, intron 3 of 20)	19909	ENSG00000170456	DENND5B	DENN domain containing 5B
chr12	31478484	31478774	*	+ 2 fold & sig. in E2	E2 vs DMSO	3.04166935777303	0.0258620817746468	Intron (ENST00000389082.10/160518, intron 3 of 20)	17128	ENSG00000170456	DENND5B	DENN domain containing 5B
chr12	31591168	31592013	*	+ 2 fold & sig. in E2	E2 vs DMSO	1.46136269647811	0.0370578771424274	Promoter	0	ENSG00000255867	DENND5B-AS1	DENND5B antisense RNA 1
chr12	31759742	31760513	*	+ 2 fold & sig. in E2	E2 vs DMSO	1.71473113246037	0.0195446874168811	Distal Intergenic	-30621	ENSG00000151743	AMN1	antagonist of mitotic exit network 1 homolog
chr12	31773188	31774062	*	+ 2 fold & sig. in E2	E2 vs DMSO	2.83487563986689	1.29619826927186e-06	Distal Intergenic	18236	ENSG00000188375	H3-5	H3.5 histone
chr12	32186934	32187723	*	+ 2 fold & sig. in E2	E2 vs DMSO	2.83331515331919	0.00020757321097299	Intron (ENST00000548411.6/636, intron 1 of 8)	79638	ENSG00000151746	BICD1	BICD cargo adaptor 1
chr12	32542853	32543510	*	+ 2 fold & sig. in E2	E2 vs DMSO	2.65022873617979	0.000269532803491949	Intron (ENST00000534526.7/121512, intron 1 of 16)	8529	ENSG00000139132	FGD4	FYVE, RhoGEF and PH domain containing 4
chr12	32661549	32662166	*	+ 2 fold & sig. in E2	E2 vs DMSO	4.62176945026405	6.02073539380565e-06	Distal Intergenic	-17034	ENSG00000087470	DNM1L	dynamin 1 like
chr12	3349569	3350626	*	+ 2 fold & sig. in E2	E2 vs DMSO	2.38207883063805	6.59476432426433e-05	Intron (ENST00000636557.1/100128253, intron 1 of 5)	-12367	NA	LOC100128253	uncharacterized LOC100128253
chr12	33587350	33588575	*	+ 2 fold & sig. in E2	E2 vs DMSO	1.30342219149471	0.00149339099904755	Distal Intergenic	-147531	ENSG00000110975	SYT10	synaptotagmin 10
chr12	3514001	3514882	*	+ 2 fold & sig. in E2	E2 vs DMSO	2.66307404745561	5.27453921385768e-09	Intron (ENST00000452611.6/56341, intron 1 of 9)	-21182	ENSG00000287243	THCAT155	thyroid cancer-associated transcript 155
chr12	3542649	3543386	*	+ 2 fold & sig. in E2	E2 vs DMSO	2.15286399133169	0.00118833494353577	Intron (ENST00000452611.6/56341, intron 2 of 9)	4435	ENSG00000111218	PRMT8	protein arginine methyltransferase 8
chr12	39442479	39444016	*	+ 2 fold & sig. in E2	E2 vs DMSO	4.24186030006401	8.69221287811057e-11	Promoter	0	ENSG00000139116	KIF21A	kinesin family member 21A
chr12	39581586	39582234	*	+ 2 fold & sig. in E2	E2 vs DMSO	1.94014931337706	0.045988945054165	Intron (ENST00000308666.4/225, intron 7 of 9)	37569	ENSG00000173208	ABCD2	ATP binding cassette subfamily D member 2
chr12	4011516	4012151	*	+ 2 fold & sig. in E2	E2 vs DMSO	2.00895518755678	3.01629000596714e-05	Promoter	-751	NA	LOC105369611	uncharacterized LOC105369611
chr12	45232869	45233366	*	+ 2 fold & sig. in E2	E2 vs DMSO	2.31464877324643	0.00145162012107766	Intron (ENST00000426898.2/196527, intron 1 of 17)	16547	ENSG00000177119	ANO6	anoctamin 6
chr12	45234245	45234793	*	+ 2 fold & sig. in E2	E2 vs DMSO	1.40070816163508	0.00927447808014173	Intron (ENST00000426898.2/196527, intron 1 of 17)	17923	ENSG00000177119	ANO6	anoctamin 6
chr12	45280087	45280531	*	+ 2 fold & sig. in E2	E2 vs DMSO	3.23813694590088	0.0123893518095777	Intron (ENST00000426898.2/196527, intron 1 of 17)	-12146	ENSG00000177119	ANO6	anoctamin 6
chr12	45549625	45550061	*	+ 2 fold & sig. in E2	E2 vs DMSO	6.19770408713164	0.0396889777066551	Intron (ENST00000551229.3/105369743, intron 2 of 5)	60529	NA	LOC105369743	uncharacterized LOC105369743
chr12	45601490	45602104	*	+ 2 fold & sig. in E2	E2 vs DMSO	2.10279599886409	0.00531777996792235	Intron (ENST00000551229.3/105369743, intron 1 of 5)	8486	NA	LOC105369743	uncharacterized LOC105369743
chr12	46208483	46209653	*	+ 2 fold & sig. in E2	E2 vs DMSO	2.43630263926433	7.47359045354709e-07	Exon (ENST00000398637.10/81539, exon 6 of 17)	-10462	ENSG00000111371	SLC38A1	solute carrier family 38 member 1
chr12	46455613	46456709	*	+ 2 fold & sig. in E2	E2 vs DMSO	1.31292745419081	0.000463800015889948	Exon (ENST00000551503.5/100288798, exon 4 of 4)	37765	NA	NA	NA
chr12	48977090	48978082	*	+ 2 fold & sig. in E2	E2 vs DMSO	1.22083162839577	0.000472414283017111	Promoter	-240	ENSG00000125084	WNT1	Wnt family member 1
chr12	49803842	49804371	*	+ 2 fold & sig. in E2	E2 vs DMSO	2.1904380512163	0.00309855371166999	5' UTR	1019	ENSG00000167566	NCKAP5L	NCK associated protein 5 like
chr12	50520980	50521594	*	+ 2 fold & sig. in E2	E2 vs DMSO	1.61216593424499	0.0306112822616121	Intron (ENST00000549620.5/57609, intron 1 of 7)	15995	ENSG00000066084	DIP2B	disco interacting protein 2 homolog B
chr12	5088638	5089342	*	+ 2 fold & sig. in E2	E2 vs DMSO	2.26539878947076	0.010166630367614	Intron (ENST00000648143.1/ENST00000648143.1, intron 1 of 1)	44759	ENSG00000130037	KCNA5	potassium voltage-gated channel subfamily A member 5
chr12	51025728	51026732	*	+ 2 fold & sig. in E2	E2 vs DMSO	3.26583370749335	5.57679199522345e-10	Promoter	0	ENSG00000110911	SLC11A2	solute carrier family 11 member 2
chr12	513384	513894	*	+ 2 fold & sig. in E2	E2 vs DMSO	2.80776217130166	0.0416144004306383	Intron (ENST00000266383.10/283358, intron 1 of 19)	-26569	ENSG00000139044	B4GALNT3	beta-1,4-N-acetyl-galactosaminyltransferase 3
chr12	51823790	51824722	*	+ 2 fold & sig. in E2	E2 vs DMSO	2.79503085773037	2.27131168947452e-08	Exon (ENST00000567167.1/ENST00000567167.1, exon 2 of 5)	-8865	ENSG00000284730	TMDD1	transmembrane and death domain 1
chr12	52025513	52026456	*	+ 2 fold & sig. in E2	E2 vs DMSO	2.01191447043128	9.57448090490994e-09	Intron (ENST00000548977.5/3164, intron 1 of 2)	2681	ENSG00000123358	NR4A1	nuclear receptor subfamily 4 group A member 1
chr12	52116039	52117251	*	+ 2 fold & sig. in E2	E2 vs DMSO	1.09154237385507	0.000396978728655826	Distal Intergenic	-11742	NA	LOC112268096	uncharacterized LOC112268096
chr12	52119334	52120239	*	+ 2 fold & sig. in E2	E2 vs DMSO	1.59370044419892	1.16913634161397e-05	Distal Intergenic	-15037	NA	LOC112268096	uncharacterized LOC112268096
chr12	52156817	52157373	*	+ 2 fold & sig. in E2	E2 vs DMSO	1.03589083978997	0.0155800673134308	Distal Intergenic	-6742	ENSG00000258279	LINC00592	long intergenic non-protein coding RNA 592
chr12	52160264	52160486	*	+ 2 fold & sig. in E2	E2 vs DMSO	1.49510971804834	0.0372204102276607	Distal Intergenic	-3629	ENSG00000258279	LINC00592	long intergenic non-protein coding RNA 592
chr12	52163830	52164498	*	+ 2 fold & sig. in E2	E2 vs DMSO	1.86220433904593	2.29700226451519e-06	Promoter	0	ENSG00000258279	LINC00592	long intergenic non-protein coding RNA 592
chr12	52200507	52201116	*	+ 2 fold & sig. in E2	E2 vs DMSO	3.20861580942678	8.89878165174636e-14	Intron (ENST00000640420.1/283404, intron 2 of 2)	7286	NA	LINC02874	long intergenic non-protein coding RNA 2874
chr12	52333178	52333743	*	+ 2 fold & sig. in E2	E2 vs DMSO	1.78845736064442	0.00625248894696891	Distal Intergenic	-11780	ENSG00000170523	KRT83	keratin 83
chr12	52371731	52372342	*	+ 2 fold & sig. in E2	E2 vs DMSO	3.26787209822059	1.89153419081111e-05	Distal Intergenic	-4250	ENSG00000135443	KRT85	keratin 85
chr12	52380318	52380958	*	+ 2 fold & sig. in E2	E2 vs DMSO	2.67124882257803	1.41977345326922e-06	Exon (ENST00000547174.1/ENST00000547174.1, exon 1 of 2)	4694	ENSG00000161849	KRT84	keratin 84
chr12	523928	524741	*	+ 2 fold & sig. in E2	E2 vs DMSO	3.25618291517645	8.43534843998442e-08	Intron (ENST00000266383.10/283358, intron 1 of 19)	-15722	ENSG00000139044	B4GALNT3	beta-1,4-N-acetyl-galactosaminyltransferase 3
chr12	5258041	5258663	*	+ 2 fold & sig. in E2	E2 vs DMSO	2.25286440988706	0.0399343152581934	Distal Intergenic	-13842	ENSG00000256115	LINC02443	long intergenic non-protein coding RNA 2443
chr12	52617211	52617915	*	+ 2 fold & sig. in E2	E2 vs DMSO	3.6848312927521	1.54219882460101e-08	Intron (ENST00000305748.7/319101, intron 1 of 8)	634	ENSG00000186049	KRT73	keratin 73
chr12	52630715	52631776	*	+ 2 fold & sig. in E2	E2 vs DMSO	2.46382386646826	7.60786749570606e-07	Exon (ENST00000550729.2/ENST00000550729.2, exon 6 of 7)	-12156	ENSG00000186049	KRT73	keratin 73
chr12	52645904	52646992	*	+ 2 fold & sig. in E2	E2 vs DMSO	2.99920318042051	9.54861294085839e-06	Exon (ENST00000309680.4/3849, exon 7 of 9)	3680	ENSG00000172867	KRT2	keratin 2
chr12	52873648	52874884	*	+ 2 fold & sig. in E2	E2 vs DMSO	1.40284323139511	3.24695210556869e-06	Distal Intergenic	-24556	ENSG00000170423	KRT78	keratin 78
chr12	52903915	52904216	*	+ 2 fold & sig. in E2	E2 vs DMSO	2.26078767705377	0.000213564769767456	Promoter	-267	ENSG00000170421	KRT8	keratin 8
chr12	52948701	52949273	*	+ 2 fold & sig. in E2	E2 vs DMSO	1.7950925046516	2.77136413033313e-05	Promoter	0	ENSG00000111057	KRT18	keratin 18
chr12	53157978	53158692	*	+ 2 fold & sig. in E2	E2 vs DMSO	1.78489428155105	0.0026672433239213	3' UTR	11684	ENSG00000139631	CSAD	cysteine sulfinic acid decarboxylase
chr12	53358724	53359343	*	+ 2 fold & sig. in E2	E2 vs DMSO	1.83334959129718	0.000791591619354657	Distal Intergenic	-13409	ENSG00000170374	SP7	Sp7 transcription factor
chr12	5379653	5380274	*	+ 2 fold & sig. in E2	E2 vs DMSO	4.71101369452752	1.90357736909677e-06	Intron (ENST00000537714.1/105369617, intron 1 of 1)	8090	NA	LOC105369617	uncharacterized LOC105369617
chr12	53871480	53872178	*	+ 2 fold & sig. in E2	E2 vs DMSO	1.60780153815492	0.0118967185618096	Intron (ENST00000663306.1/107984525, intron 3 of 4)	-66653	ENSG00000123364	HOXC13	homeobox C13
chr12	55057191	55057857	*	+ 2 fold & sig. in E2	E2 vs DMSO	2.99085946641334	0.00249005272940503	Distal Intergenic	37217	ENSG00000123307	NEUROD4	neuronal differentiation 4
chr12	5634935	5635659	*	+ 2 fold & sig. in E2	E2 vs DMSO	3.54913384310735	4.50657429298912e-05	Exon (ENST00000327087.12/57101, exon 18 of 27)	-19640	ENSG00000047617	ANO2	anoctamin 2
chr12	57101696	57102920	*	+ 2 fold & sig. in E2	E2 vs DMSO	2.20919427949323	6.17567218259889e-09	Promoter	0	ENSG00000166888	STAT6	signal transducer and activator of transcription 6
chr12	57723183	57723758	*	+ 2 fold & sig. in E2	E2 vs DMSO	2.96264723167175	0.000747981586927329	Intron (ENST00000700670.1/100130776, intron 3 of 3)	-2513	ENSG00000255737	AGAP2-AS1	AGAP2 antisense RNA 1
chr12	5919057	5919785	*	+ 2 fold & sig. in E2	E2 vs DMSO	3.08486519610436	0.019071474341649	Intron (ENST00000327087.12/57101, intron 3 of 26)	25443	ENSG00000047617	ANO2	anoctamin 2
chr12	6063062	6064104	*	+ 2 fold & sig. in E2	E2 vs DMSO	1.61958617969371	0.00209095762335499	Intron (ENST00000261405.10/7450, intron 12 of 51)	-41136	ENSG00000110799	VWF	von Willebrand factor
chr12	6064952	6065853	*	+ 2 fold & sig. in E2	E2 vs DMSO	1.72241978950314	0.000899180907007893	Exon (ENST00000261405.10/7450, exon 11 of 52)	-43026	ENSG00000110799	VWF	von Willebrand factor
chr12	6088799	6089586	*	+ 2 fold & sig. in E2	E2 vs DMSO	3.09774955845697	6.14270110225155e-11	Intron (ENST00000261405.10/7450, intron 6 of 51)	35079	ENSG00000110799	VWF	von Willebrand factor
chr12	6092940	6093874	*	+ 2 fold & sig. in E2	E2 vs DMSO	1.45664268199891	0.000220741010524915	Intron (ENST00000261405.10/7450, intron 6 of 51)	30791	ENSG00000110799	VWF	von Willebrand factor
chr12	6107841	6108267	*	+ 2 fold & sig. in E2	E2 vs DMSO	7.32064275646359	0.00239333619881211	Intron (ENST00000261405.10/7450, intron 5 of 51)	16398	ENSG00000110799	VWF	von Willebrand factor
chr12	6200333	6201652	*	+ 2 fold & sig. in E2	E2 vs DMSO	1.57918455291242	0.00313057541288535	Promoter	0	ENSG00000010278	CD9	CD9 molecule
chr12	6237538	6237758	*	+ 2 fold & sig. in E2	E2 vs DMSO	3.89632708855024	0.000493858171856233	3' UTR	4317	ENSG00000010278	CD9	CD9 molecule
chr12	6254579	6255250	*	+ 2 fold & sig. in E2	E2 vs DMSO	3.24248362562504	2.15660533696057e-08	Distal Intergenic	21358	ENSG00000010278	CD9	CD9 molecule
chr12	6262152	6262608	*	+ 2 fold & sig. in E2	E2 vs DMSO	3.06134728596875	1.84476179173112e-07	Distal Intergenic	28931	ENSG00000010278	CD9	CD9 molecule
chr12	6262665	6262892	*	+ 2 fold & sig. in E2	E2 vs DMSO	2.28448716716405	0.000548631698756215	Distal Intergenic	29444	ENSG00000010278	CD9	CD9 molecule
chr12	6272369	6273372	*	+ 2 fold & sig. in E2	E2 vs DMSO	2.39643963033802	4.13610668844205e-08	Distal Intergenic	-37064	ENSG00000008323	PLEKHG6	pleckstrin homology and RhoGEF domain containing G6
chr12	6278075	6279121	*	+ 2 fold & sig. in E2	E2 vs DMSO	4.54681778111838	2.69400142137751e-13	Distal Intergenic	-31315	ENSG00000008323	PLEKHG6	pleckstrin homology and RhoGEF domain containing G6
chr12	6279964	6280423	*	+ 2 fold & sig. in E2	E2 vs DMSO	2.2096315400301	1.07943479265595e-06	Distal Intergenic	-30013	ENSG00000008323	PLEKHG6	pleckstrin homology and RhoGEF domain containing G6
chr12	63086424	63087051	*	+ 2 fold & sig. in E2	E2 vs DMSO	4.24602803041506	1.6295380877419e-07	Distal Intergenic	63128	ENSG00000166148	AVPR1A	arginine vasopressin receptor 1A
chr12	63572101	63572863	*	+ 2 fold & sig. in E2	E2 vs DMSO	1.80608029755816	0.0135782831160588	Intron (ENST00000324472.9/283417, intron 19 of 21)	-2632	ENSG00000177990	DPY19L2	dpy-19 like 2
chr12	63643270	63643992	*	+ 2 fold & sig. in E2	E2 vs DMSO	2.77961405053584	0.00354302821218125	Intron (ENST00000324472.9/283417, intron 6 of 21)	-23048	ENSG00000177990	DPY19L2	dpy-19 like 2
chr12	6370697	6371472	*	+ 2 fold & sig. in E2	E2 vs DMSO	1.04129453933435	0.0189841473948821	Intron (ENST00000360168.7/6337, intron 1 of 11)	3331	ENSG00000111319	SCNN1A	sodium channel epithelial 1 subunit alpha
chr12	64081120	64081546	*	+ 2 fold & sig. in E2	E2 vs DMSO	2.85147333318177	0.0395829225790312	Exon (ENST00000537556.1/57522, exon 10 of 10)	-30265	ENSG00000196935	SRGAP1	SLIT-ROBO Rho GTPase activating protein 1
chr12	64600198	64601267	*	+ 2 fold & sig. in E2	E2 vs DMSO	1.72633945776056	0.00129364744904439	Intron (ENST00000637125.1/283349, intron 2 of 5)	8192	NA	RASSF3-DT	RASSF3 divergent transcript
chr12	64610480	64611607	*	+ 2 fold & sig. in E2	E2 vs DMSO	2.97414851086478	2.40333369261772e-07	Promoter	0	ENSG00000153179	RASSF3	Ras association domain family member 3
chr12	64625248	64625967	*	+ 2 fold & sig. in E2	E2 vs DMSO	1.13852373400083	0.0108157341179281	Intron (ENST00000637125.1/283349, intron 2 of 5)	-2643	ENSG00000266016	MIR548Z	microRNA 548z
chr12	64679349	64680601	*	+ 2 fold & sig. in E2	E2 vs DMSO	1.16388538655508	0.00972575869405273	Intron (ENST00000637125.1/283349, intron 2 of 5)	48553	ENSG00000135677	GNS	glucosamine (N-acetyl)-6-sulfatase
chr12	64722771	64723489	*	+ 2 fold & sig. in E2	E2 vs DMSO	1.72965653965126	0.0197515943298092	Exon (ENST00000418919.6/2799, exon 10 of 13)	5665	ENSG00000135677	GNS	glucosamine (N-acetyl)-6-sulfatase
chr12	64824334	64825692	*	+ 2 fold & sig. in E2	E2 vs DMSO	1.20225923890196	0.00866095560236554	Promoter	0	ENSG00000111490	TBC1D30	TBC1 domain family member 30
chr12	67275483	67276159	*	+ 2 fold & sig. in E2	E2 vs DMSO	1.36847629644542	0.00188763681084797	Intron (ENST00000545606.6/55832, intron 1 of 14)	5582	ENSG00000111530	CAND1	cullin associated and neddylation dissociated 1
chr12	67544999	67545723	*	+ 2 fold & sig. in E2	E2 vs DMSO	3.46437913730155	1.18030774986944e-07	Intron (ENST00000650195.1/105369812, intron 3 of 4)	24917	ENSG00000203585	LINC02408	long intergenic non-protein coding RNA 2408
chr12	68792777	68793878	*	+ 2 fold & sig. in E2	E2 vs DMSO	4.30763522765267	3.88013622141896e-16	3' UTR	11601	NA	LOC100130075	SUZ RNA binding domain containing 1 pseudogene
chr12	68804319	68804783	*	+ 2 fold & sig. in E2	E2 vs DMSO	1.90397331998474	0.00787967530098246	Distal Intergenic	696	NA	LOC100130075	SUZ RNA binding domain containing 1 pseudogene
chr12	68807416	68809236	*	+ 2 fold & sig. in E2	E2 vs DMSO	1.68771997883832	4.55486999723171e-06	Promoter	0	ENSG00000135679	MDM2	MDM2 proto-oncogene
chr12	68827253	68827647	*	+ 2 fold & sig. in E2	E2 vs DMSO	3.28853511951125	0.0106157983903655	Intron (ENST00000258149.11/4193, intron 7 of 10)	3050	ENSG00000135679	MDM2	MDM2 proto-oncogene
chr12	69068448	69068956	*	+ 2 fold & sig. in E2	E2 vs DMSO	2.33634892041745	0.0109042660056087	Distal Intergenic	-96878	ENSG00000135678	CPM	carboxypeptidase M
chr12	70249776	70250276	*	+ 2 fold & sig. in E2	E2 vs DMSO	2.12677057899361	0.00431779284322217	Intron (ENST00000547780.5/4848, intron 2 of 3)	6025	ENSG00000111596	CNOT2	CCR4-NOT transcription complex subunit 2
chr12	70365319	70366395	*	+ 2 fold & sig. in E2	E2 vs DMSO	1.8820158710041	0.00570458869612229	Promoter	0	ENSG00000135643	KCNMB4	potassium calcium-activated channel subfamily M regulatory beta subunit 4
chr12	725081	725548	*	+ 2 fold & sig. in E2	E2 vs DMSO	1.39930212571687	0.0449734851261957	Distal Intergenic	-27031	ENSG00000060237	WNK1	WNK lysine deficient protein kinase 1
chr12	7265091	7265886	*	+ 2 fold & sig. in E2	E2 vs DMSO	2.49938916603849	5.34634539077319e-05	Distal Intergenic	-38186	ENSG00000215009	ACSM4	acyl-CoA synthetase medium chain family member 4
chr12	75162355	75163215	*	+ 2 fold & sig. in E2	E2 vs DMSO	2.35380695584761	8.29981731429944e-07	Intron (ENST00000548513.5/3747, intron 1 of 4)	-22159	ENSG00000166006	KCNC2	potassium voltage-gated channel subfamily C member 2
chr12	75711081	75711634	*	+ 2 fold & sig. in E2	E2 vs DMSO	2.97772703090161	5.1102862885841e-10	Intron (ENST00000552856.1/105369844, intron 2 of 4)	-12265	NA	LOC105369844	uncharacterized LOC105369844
chr12	75712159	75712774	*	+ 2 fold & sig. in E2	E2 vs DMSO	1.39889617916906	0.00322282798072276	Intron (ENST00000552856.1/105369844, intron 2 of 4)	-13343	NA	LOC105369844	uncharacterized LOC105369844
chr12	75766453	75767250	*	+ 2 fold & sig. in E2	E2 vs DMSO	1.70113145996966	0.0214873884387425	Intron (ENST00000552856.1/105369844, intron 2 of 4)	-67637	NA	LOC105369844	uncharacterized LOC105369844
chr12	76030725	76032408	*	+ 2 fold & sig. in E2	E2 vs DMSO	2.24238421774651	1.97827497001951e-06	Promoter	0	ENSG00000139289	PHLDA1	pleckstrin homology like domain family A member 1
chr12	7885934	7886397	*	+ 2 fold & sig. in E2	E2 vs DMSO	3.73407507602615	0.00168393200324759	Intron (ENST00000539924.5/144195, intron 1 of 9)	4751	ENSG00000173262	SLC2A14	solute carrier family 2 member 14
chr12	79022763	79023463	*	+ 2 fold & sig. in E2	E2 vs DMSO	1.57752952097546	0.0108119339855732	Intron (ENST00000393240.7/6857, intron 3 of 11)	-22121	ENSG00000067715	SYT1	synaptotagmin 1
chr12	7919496	7920369	*	+ 2 fold & sig. in E2	E2 vs DMSO	1.36616303813828	0.00838067351921253	3' UTR	2920	ENSG00000059804	SLC2A3	solute carrier family 2 member 3
chr12	82909012	82909583	*	+ 2 fold & sig. in E2	E2 vs DMSO	2.17705840590605	0.0446439914229894	Intron (ENST00000551915.5/160335, intron 3 of 7)	150457	ENSG00000179104	TMTC2	transmembrane O-mannosyltransferase targeting cadherins 2
chr12	88684181	88685052	*	+ 2 fold & sig. in E2	E2 vs DMSO	1.37139577175113	0.0277002059027667	Distal Intergenic	102161	NA	LOC105369885	uncharacterized LOC105369885
chr12	89390761	89391452	*	+ 2 fold & sig. in E2	E2 vs DMSO	3.40590528131139	0.00514658815423349	Intron (ENST00000657284.1/124902981, intron 1 of 2)	36963	NA	NA	NA
chr12	89422267	89422739	*	+ 2 fold & sig. in E2	E2 vs DMSO	2.42063905108511	5.26043016610084e-05	Intron (ENST00000549591.1/282809, intron 1 of 1)	6721	ENSG00000139323	POC1B	POC1 centriolar protein B
chr12	89424814	89425436	*	+ 2 fold & sig. in E2	E2 vs DMSO	4.67605055279218	8.5150632084252e-14	3' UTR	4024	ENSG00000139323	POC1B	POC1 centriolar protein B
chr12	89707975	89708517	*	+ 2 fold & sig. in E2	E2 vs DMSO	2.46404494627231	0.00115230728825432	Promoter	319	ENSG00000070961	ATP2B1	ATPase plasma membrane Ca2+ transporting 1
chr12	89708884	89710237	*	+ 2 fold & sig. in E2	E2 vs DMSO	1.27052976194289	0.0027441772890764	Promoter	0	ENSG00000271614	ATP2B1-AS1	ATP2B1 antisense RNA 1
chr12	9131948	9132673	*	+ 2 fold & sig. in E2	E2 vs DMSO	3.05827907595846	0.000787785800613689	Distal Intergenic	-15719	ENSG00000175899	A2M	alpha-2-macroglobulin
chr12	91613430	91613897	*	+ 2 fold & sig. in E2	E2 vs DMSO	2.50740610714053	0.0215703587092091	Intron (ENST00000685093.1/105369896, intron 1 of 9)	20330	NA	LOC105369896	uncharacterized LOC105369896
chr12	91883678	91884209	*	+ 2 fold & sig. in E2	E2 vs DMSO	2.5501718860925	8.98295597378523e-05	Distal Intergenic	6287	ENSG00000257893	LINC02404	long intergenic non-protein coding RNA 2404
chr12	92434437	92434797	*	+ 2 fold & sig. in E2	E2 vs DMSO	6.45516559171452	0.0232675965258196	Intron (ENST00000508671.1/100507616, intron 1 of 1)	-6289	ENSG00000205057	CLLU1-AS1	CLLU1 antisense RNA 1
chr12	92928988	92929869	*	+ 2 fold & sig. in E2	E2 vs DMSO	1.36433709086594	0.0129363340978271	Promoter	0	ENSG00000102189	EEA1	early endosome antigen 1
chr12	93107320	93108273	*	+ 2 fold & sig. in E2	E2 vs DMSO	3.50471658307352	6.86681471910751e-08	Exon (ENST00000657309.1/105369908, exon 5 of 5)	11644	NA	LOC105369908	uncharacterized LOC105369908
chr12	93125034	93125625	*	+ 2 fold & sig. in E2	E2 vs DMSO	2.181007864395	0.0122068144828857	Intron (ENST00000550324.6/643339, intron 1 of 2)	13507	NA	LOC643339	uncharacterized LOC643339
chr12	95098185	95098909	*	+ 2 fold & sig. in E2	E2 vs DMSO	2.12331322660307	0.000114681569085052	Intron (ENST00000343958.9/55785, intron 14 of 20)	-6398	ENSG00000180263	FGD6	FYVE, RhoGEF and PH domain containing 6
chr12	95172441	95173098	*	+ 2 fold & sig. in E2	E2 vs DMSO	1.90676931459299	0.00921405109987689	Exon (ENST00000343958.9/55785, exon 3 of 21)	35858	ENSG00000180263	FGD6	FYVE, RhoGEF and PH domain containing 6
chr12	97487390	97488010	*	+ 2 fold & sig. in E2	E2 vs DMSO	1.33231492050273	0.0408737983181674	Intron (ENST00000640149.1/196475, intron 5 of 13)	-3899	ENSG00000221479	MIR1251	microRNA 1251
chr12	97500122	97501270	*	+ 2 fold & sig. in E2	E2 vs DMSO	2.59462802335183	4.38078328977937e-10	Intron (ENST00000640149.1/196475, intron 10 of 13)	5468	ENSG00000255794	RMST	rhabdomyosarcoma 2 associated transcript
chr12	97555810	97556841	*	+ 2 fold & sig. in E2	E2 vs DMSO	2.63824011177704	5.86120395590927e-07	Intron (ENST00000640149.1/196475, intron 11 of 13)	-6971	ENSG00000207586	MIR135A2	microRNA 135a-2
chr12	97701639	97702417	*	+ 2 fold & sig. in E2	E2 vs DMSO	2.10419777960949	0.000723041356308784	Intron (ENST00000701071.1/643711, intron 2 of 2)	51181	ENSG00000257501	PAFAH1B2P2	PAFAH1B2 pseudogene 2
chr12	98358242	98359069	*	+ 2 fold & sig. in E2	E2 vs DMSO	3.15833739949305	5.87220477832866e-08	Distal Intergenic	98046	ENSG00000227825	SLC9A7P1	solute carrier family 9 member 7 pseudogene 1
chr13	100035845	100036402	*	+ 2 fold & sig. in E2	E2 vs DMSO	1.48489034987692	0.0323808410648747	Distal Intergenic	-37936	ENSG00000260738	LINC00554	long intergenic non-protein coding RNA 554
chr13	100611726	100612345	*	+ 2 fold & sig. in E2	E2 vs DMSO	3.37366192591061	0.00748013302597271	Intron (ENST00000342624.10/84899, intron 17 of 18)	-22198	ENSG00000134864	GGACT	gamma-glutamylamine cyclotransferase
chr13	104641209	104641886	*	+ 2 fold & sig. in E2	E2 vs DMSO	2.94775477090498	6.5944333600027e-05	Distal Intergenic	515279	ENSG00000287734	LOC105370340	uncharacterized LOC105370340
chr13	105906849	105907289	*	+ 2 fold & sig. in E2	E2 vs DMSO	2.55362627448064	0.00241596068627645	Distal Intergenic	156547	NA	NA	NA
chr13	108711253	108711686	*	+ 2 fold & sig. in E2	E2 vs DMSO	7.4538546126693	0.00151805632002511	Intron (ENST00000356711.7/23026, intron 2 of 34)	-67856	ENSG00000041515	MYO16	myosin XVI
chr13	108902387	108903197	*	+ 2 fold & sig. in E2	E2 vs DMSO	1.73828943056821	0.000390699715499165	Intron (ENST00000356711.7/23026, intron 15 of 34)	47091	ENSG00000041515	MYO16	myosin XVI
chr13	108957231	108957908	*	+ 2 fold & sig. in E2	E2 vs DMSO	2.03701556966924	0.0256154707629113	Exon (ENST00000356711.7/23026, exon 17 of 35)	101935	ENSG00000041515	MYO16	myosin XVI
chr13	109026483	109027278	*	+ 2 fold & sig. in E2	E2 vs DMSO	4.05599398747114	0.000418995285942376	Intron (ENST00000356711.7/23026, intron 23 of 34)	74641	NA	MYO16-AS2	MYO16 antisense RNA 2
chr13	109087495	109088333	*	+ 2 fold & sig. in E2	E2 vs DMSO	7.44449690782441	0.00164899898791946	Intron (ENST00000356711.7/23026, intron 27 of 34)	13586	NA	MYO16-AS2	MYO16 antisense RNA 2
chr13	109243315	109243936	*	+ 2 fold & sig. in E2	E2 vs DMSO	4.2621100056726	7.08378715575382e-05	Distal Intergenic	-38037	ENSG00000223617	LINC00370	long intergenic non-protein coding RNA 370
chr13	109509294	109510234	*	+ 2 fold & sig. in E2	E2 vs DMSO	3.69963524631334	2.00363660497094e-07	Intron (ENST00000650264.1/107984602, intron 3 of 3)	108598	ENSG00000229792	LINC00399	long intergenic non-protein coding RNA 399
chr13	109642516	109642908	*	+ 2 fold & sig. in E2	E2 vs DMSO	1.49913948644925	0.00970697781155425	Intron (ENST00000650264.1/107984602, intron 1 of 3)	-85374	ENSG00000234854	LINC00676	long intergenic non-protein coding RNA 676
chr13	109643879	109644715	*	+ 2 fold & sig. in E2	E2 vs DMSO	2.34540094997331	4.84268023569063e-08	Intron (ENST00000650264.1/107984602, intron 1 of 3)	-83567	ENSG00000234854	LINC00676	long intergenic non-protein coding RNA 676
chr13	109743611	109744299	*	+ 2 fold & sig. in E2	E2 vs DMSO	2.80206665103561	4.97268592004695e-05	Distal Intergenic	-11911	NA	LOC107984602	uncharacterized LOC107984602
chr13	109786454	109787020	*	+ 2 fold & sig. in E2	E2 vs DMSO	3.5043710041191	0.00325676018188853	Promoter	0	ENSG00000185950	IRS2	insulin receptor substrate 2
chr13	109803776	109804355	*	+ 2 fold & sig. in E2	E2 vs DMSO	1.99873819462868	0.0203703287751932	Intron (ENST00000615635.1/105370360, intron 1 of 2)	-17193	ENSG00000185950	IRS2	insulin receptor substrate 2
chr13	110000162	110000522	*	+ 2 fold & sig. in E2	E2 vs DMSO	2.29076653035744	0.0316428002981325	Intron (ENST00000614099.1/101927646, intron 2 of 2)	42257	NA	LOC101927646	uncharacterized LOC101927646
chr13	110012011	110012465	*	+ 2 fold & sig. in E2	E2 vs DMSO	7.50490658929225	0.00232972491114327	Intron (ENST00000614099.1/101927646, intron 2 of 2)	30314	NA	LOC101927646	uncharacterized LOC101927646
chr13	110137851	110138842	*	+ 2 fold & sig. in E2	E2 vs DMSO	1.66993258230985	0.0298941804991979	Promoter	-945	NA	LOC101927712	uncharacterized LOC101927712
chr13	110561144	110561764	*	+ 2 fold & sig. in E2	E2 vs DMSO	1.99111002847335	0.0250129471070746	Promoter	0	ENSG00000139832	RAB20	RAB20, member RAS oncogene family
chr13	110567264	110568057	*	+ 2 fold & sig. in E2	E2 vs DMSO	3.08168515817857	1.10937143914968e-10	Distal Intergenic	-5542	ENSG00000139832	RAB20	RAB20, member RAS oncogene family
chr13	110575211	110576092	*	+ 2 fold & sig. in E2	E2 vs DMSO	3.58073235587196	2.11478075448779e-07	Distal Intergenic	-13489	ENSG00000139832	RAB20	RAB20, member RAS oncogene family
chr13	110816970	110817435	*	+ 2 fold & sig. in E2	E2 vs DMSO	2.83789714285308	0.0427673905924957	Distal Intergenic	-3886	ENSG00000259831	LINC00567	long intergenic non-protein coding RNA 567
chr13	111507868	111508489	*	+ 2 fold & sig. in E2	E2 vs DMSO	2.01717490131858	0.0151610055589937	Distal Intergenic	-79802	NA	LOC102724489	uncharacterized LOC102724489
chr13	111894018	111894586	*	+ 2 fold & sig. in E2	E2 vs DMSO	7.19931766818726	0.00436496579885811	Promoter	273	ENSG00000226903	LINC00354	long intergenic non-protein coding RNA 354
chr13	111913257	111914622	*	+ 2 fold & sig. in E2	E2 vs DMSO	2.67055243357321	1.86856796556212e-11	Distal Intergenic	13269	ENSG00000226903	LINC00354	long intergenic non-protein coding RNA 354
chr13	112443563	112444429	*	+ 2 fold & sig. in E2	E2 vs DMSO	2.19720288690868	0.00120110958249854	Distal Intergenic	45394	ENSG00000126216	TUBGCP3	tubulin gamma complex associated protein 3
chr13	112447866	112448068	*	+ 2 fold & sig. in E2	E2 vs DMSO	7.19178702186775	0.00390025226846766	Distal Intergenic	41755	ENSG00000126216	TUBGCP3	tubulin gamma complex associated protein 3
chr13	112448977	112449653	*	+ 2 fold & sig. in E2	E2 vs DMSO	3.08872311922484	8.19726443260554e-06	Distal Intergenic	40170	ENSG00000126216	TUBGCP3	tubulin gamma complex associated protein 3
chr13	112509086	112509501	*	+ 2 fold & sig. in E2	E2 vs DMSO	3.46157456532317	0.00465388606908151	Intron (ENST00000261965.8/10426, intron 17 of 21)	-19263	ENSG00000126216	TUBGCP3	tubulin gamma complex associated protein 3
chr13	112510001	112510726	*	+ 2 fold & sig. in E2	E2 vs DMSO	2.52752901075065	8.03213229981622e-05	Intron (ENST00000261965.8/10426, intron 17 of 21)	-20178	ENSG00000126216	TUBGCP3	tubulin gamma complex associated protein 3
chr13	112587351	112588428	*	+ 2 fold & sig. in E2	E2 vs DMSO	2.769514112481	4.99428815747946e-05	Promoter	0	ENSG00000126216	TUBGCP3	tubulin gamma complex associated protein 3
chr13	112594038	112594910	*	+ 2 fold & sig. in E2	E2 vs DMSO	2.96047362600193	1.39394965907098e-08	Distal Intergenic	-5833	ENSG00000126216	TUBGCP3	tubulin gamma complex associated protein 3
chr13	112601151	112602034	*	+ 2 fold & sig. in E2	E2 vs DMSO	2.78263072765908	3.02155585899871e-08	Distal Intergenic	-12946	ENSG00000126216	TUBGCP3	tubulin gamma complex associated protein 3
chr13	112606350	112606785	*	+ 2 fold & sig. in E2	E2 vs DMSO	7.810325865882	0.000421741236357337	Exon (ENST00000613809.1/ENST00000613809.1, exon 1 of 1)	-18145	ENSG00000126216	TUBGCP3	tubulin gamma complex associated protein 3
chr13	112616582	112617290	*	+ 2 fold & sig. in E2	E2 vs DMSO	3.65383057154001	5.01313399441176e-12	Distal Intergenic	-28377	ENSG00000126216	TUBGCP3	tubulin gamma complex associated protein 3
chr13	112670033	112670860	*	+ 2 fold & sig. in E2	E2 vs DMSO	4.07771243921479	7.850383370926e-07	Intron (ENST00000623100.2/400165, intron 1 of 2)	18900	NA	LOC102725228	uncharacterized LOC102725228
chr13	112711408	112712340	*	+ 2 fold & sig. in E2	E2 vs DMSO	1.47300168530704	4.79051112640616e-05	Intron (ENST00000375645.8/23250, intron 1 of 29)	8121	ENSG00000068650	ATP11A	ATPase phospholipid transporting 11A
chr13	112722467	112723298	*	+ 2 fold & sig. in E2	E2 vs DMSO	2.71941832364954	1.81082929557852e-09	Intron (ENST00000375645.8/23250, intron 1 of 29)	19180	ENSG00000068650	ATP11A	ATPase phospholipid transporting 11A
chr13	112760476	112760921	*	+ 2 fold & sig. in E2	E2 vs DMSO	2.89904834029074	0.0305953951821641	Intron (ENST00000375645.8/23250, intron 1 of 29)	-5783	ENSG00000232684	ATP11A-AS1	ATP11A antisense RNA 1
chr13	112761768	112762435	*	+ 2 fold & sig. in E2	E2 vs DMSO	3.11256201296543	3.93864444846976e-05	Intron (ENST00000375645.8/23250, intron 1 of 29)	-7075	ENSG00000232684	ATP11A-AS1	ATP11A antisense RNA 1
chr13	112893626	112894824	*	+ 2 fold & sig. in E2	E2 vs DMSO	2.01395350136696	0.000591014582612914	Promoter	0	ENSG00000126217	MCF2L	MCF.2 cell line derived transforming sequence like
chr13	112905753	112906771	*	+ 2 fold & sig. in E2	E2 vs DMSO	2.68878340256163	4.78324728903281e-10	Intron (ENST00000375608.7/23263, intron 2 of 29)	3558	ENSG00000126217	MCF2L	MCF.2 cell line derived transforming sequence like
chr13	112913198	112914561	*	+ 2 fold & sig. in E2	E2 vs DMSO	4.50091207160534	3.26202522384266e-15	Intron (ENST00000375608.7/23263, intron 2 of 29)	11003	ENSG00000126217	MCF2L	MCF.2 cell line derived transforming sequence like
chr13	112926071	112926517	*	+ 2 fold & sig. in E2	E2 vs DMSO	2.02497378053385	0.0499102929561115	Intron (ENST00000375608.7/23263, intron 2 of 29)	23876	ENSG00000126217	MCF2L	MCF.2 cell line derived transforming sequence like
chr13	112930917	112932269	*	+ 2 fold & sig. in E2	E2 vs DMSO	2.64809449898098	8.39757363337798e-09	Intron (ENST00000375608.7/23263, intron 2 of 29)	28722	ENSG00000126217	MCF2L	MCF.2 cell line derived transforming sequence like
chr13	112942664	112943388	*	+ 2 fold & sig. in E2	E2 vs DMSO	1.12528879300099	0.0371421567685121	Intron (ENST00000375608.7/23263, intron 2 of 29)	-25112	ENSG00000126217	MCF2L	MCF.2 cell line derived transforming sequence like
chr13	112968361	112969688	*	+ 2 fold & sig. in E2	E2 vs DMSO	3.99918431920269	1.17483763683688e-12	Promoter	0	ENSG00000126217	MCF2L	MCF.2 cell line derived transforming sequence like
chr13	112983463	112984049	*	+ 2 fold & sig. in E2	E2 vs DMSO	2.84213202039167	6.23105118528805e-10	Intron (ENST00000375608.7/23263, intron 2 of 29)	-1069	ENSG00000126217	MCF2L	MCF.2 cell line derived transforming sequence like
chr13	112990747	112991167	*	+ 2 fold & sig. in E2	E2 vs DMSO	2.23025365292721	0.00141528556738179	Intron (ENST00000375608.7/23263, intron 2 of 29)	5629	ENSG00000126217	MCF2L	MCF.2 cell line derived transforming sequence like
chr13	112997321	112997864	*	+ 2 fold & sig. in E2	E2 vs DMSO	2.16703698952573	4.34358540894935e-06	Intron (ENST00000375608.7/23263, intron 2 of 29)	-3406	ENSG00000126217	MCF2L	MCF.2 cell line derived transforming sequence like
chr13	113001097	113002515	*	+ 2 fold & sig. in E2	E2 vs DMSO	3.01636079883155	4.8543103711135e-12	Promoter	0	ENSG00000126217	MCF2L	MCF.2 cell line derived transforming sequence like
chr13	113013114	113014236	*	+ 2 fold & sig. in E2	E2 vs DMSO	1.28873198130314	6.73355864395149e-05	Intron (ENST00000375608.7/23263, intron 2 of 29)	-10428	ENSG00000126217	MCF2L	MCF.2 cell line derived transforming sequence like
chr13	113022644	113023546	*	+ 2 fold & sig. in E2	E2 vs DMSO	1.22192764749619	0.000599071740435982	Intron (ENST00000375608.7/23263, intron 3 of 29)	-1118	ENSG00000126217	MCF2L	MCF.2 cell line derived transforming sequence like
chr13	113208343	113209437	*	+ 2 fold & sig. in E2	E2 vs DMSO	3.17562915484946	0.000864907175298803	Promoter	0	ENSG00000126226	PCID2	PCI domain containing 2
chr13	113209912	113210281	*	+ 2 fold & sig. in E2	E2 vs DMSO	6.67866136463304	0.0169277235642971	Promoter	29	ENSG00000139842	CUL4A	cullin 4A
chr13	113427339	113428773	*	+ 2 fold & sig. in E2	E2 vs DMSO	1.70658651453055	0.000119830550601236	Intron (ENST00000612156.3/113622, intron 4 of 7)	-16364	ENSG00000153531	ADPRHL1	ADP-ribosylhydrolase like 1
chr13	113548505	113549496	*	+ 2 fold & sig. in E2	E2 vs DMSO	2.01418903731908	0.000562133087561642	Promoter	172	ENSG00000150403	TMCO3	transmembrane and coiled-coil domains 3
chr13	113787529	113788033	*	+ 2 fold & sig. in E2	E2 vs DMSO	3.98076055906791	1.39518832992568e-06	Intron (ENST00000375353.5/348013, intron 3 of 8)	-11855	ENSG00000184497	TMEM255B	transmembrane protein 255B
chr13	113833201	113834016	*	+ 2 fold & sig. in E2	E2 vs DMSO	2.01535894516865	1.82439498563926e-05	Promoter	0	ENSG00000183087	GAS6	growth arrest specific 6
chr13	113863326	113864455	*	+ 2 fold & sig. in E2	E2 vs DMSO	9.83626018094785	3.14019530791647e-07	Promoter	0	ENSG00000272695	GAS6-DT	GAS6 divergent transcript
chr13	113928338	113929395	*	+ 2 fold & sig. in E2	E2 vs DMSO	4.2481091040671	1.3785840877079e-12	Promoter	0	NA	LINC00565	long intergenic non-protein coding RNA 565
chr13	113938372	113939264	*	+ 2 fold & sig. in E2	E2 vs DMSO	1.91522880268126	0.0196505651820151	Distal Intergenic	-9381	NA	LINC00565	long intergenic non-protein coding RNA 565
chr13	114032216	114032637	*	+ 2 fold & sig. in E2	E2 vs DMSO	2.38619689275543	3.17551967520869e-05	Intron (ENST00000334062.8/22821, intron 4 of 23)	3556	ENSG00000185989	RASA3	RAS p21 protein activator 3
chr13	114035608	114037147	*	+ 2 fold & sig. in E2	E2 vs DMSO	2.48656335170239	1.81082929557852e-09	Promoter	0	ENSG00000185989	RASA3	RAS p21 protein activator 3
chr13	114078374	114079255	*	+ 2 fold & sig. in E2	E2 vs DMSO	1.967632872859	3.51718453335993e-08	Intron (ENST00000334062.8/22821, intron 1 of 23)	29565	NA	RASA3-IT1	RASA3 intronic transcript 1
chr13	114281149	114282573	*	+ 2 fold & sig. in E2	E2 vs DMSO	3.11964037934917	3.76165100545633e-07	Promoter	0	ENSG00000169062	UPF3A	UPF3A regulator of nonsense mediated mRNA decay
chr13	21529401	21530033	*	+ 2 fold & sig. in E2	E2 vs DMSO	4.33959756890581	4.2910064067608e-08	Intron (ENST00000382374.9/221154, intron 4 of 11)	-13740	ENSG00000165487	MICU2	mitochondrial calcium uptake 2
chr13	22956599	22957068	*	+ 2 fold & sig. in E2	E2 vs DMSO	2.84402033461967	0.0449721319184046	Distal Intergenic	29947	NA	NA	NA
chr13	22996671	22997469	*	+ 2 fold & sig. in E2	E2 vs DMSO	2.4705589024176	0.0121888830258937	Distal Intergenic	70019	NA	NA	NA
chr13	23065679	23066537	*	+ 2 fold & sig. in E2	E2 vs DMSO	1.54738360545965	0.0452636299994468	Distal Intergenic	104060	NA	LINC00362	long intergenic non-protein coding RNA 362
chr13	23450389	23450893	*	+ 2 fold & sig. in E2	E2 vs DMSO	6.93679972697669	0.00880206352533523	Distal Intergenic	-14883	ENSG00000232977	LINC00327	long intergenic non-protein coding RNA 327
chr13	23751963	23752171	*	+ 2 fold & sig. in E2	E2 vs DMSO	6.53821566755546	0.0204916128109472	Intron (ENST00000464194.3/4285, intron 1 of 1)	4659	ENSG00000027001	MIPEP	mitochondrial intermediate peptidase
chr13	24160065	24161777	*	+ 2 fold & sig. in E2	E2 vs DMSO	1.56376760470809	3.77075938220583e-05	Promoter	0	ENSG00000182957	SPATA13	spermatogenesis associated 13
chr13	25729111	25729908	*	+ 2 fold & sig. in E2	E2 vs DMSO	7.59566628104974	0.000585395667206086	Intron (ENST00000381655.7/51761, intron 25 of 36)	-98028	ENSG00000132932	ATP8A2	ATPase phospholipid transporting 8A2
chr13	26022466	26023207	*	+ 2 fold & sig. in E2	E2 vs DMSO	2.90261397330379	3.19611964734513e-09	3' UTR	12495	ENSG00000132932	ATP8A2	ATPase phospholipid transporting 8A2
chr13	26977994	26978873	*	+ 2 fold & sig. in E2	E2 vs DMSO	3.30076929423273	1.64359227492989e-12	Intron (ENST00000637583.1/ENST00000637583.1, intron 2 of 2)	116833	ENSG00000152484	USP12	ubiquitin specific peptidase 12
chr13	26983091	26983555	*	+ 2 fold & sig. in E2	E2 vs DMSO	1.6620384365499	0.00181205245566953	Intron (ENST00000637583.1/ENST00000637583.1, intron 2 of 2)	112151	ENSG00000152484	USP12	ubiquitin specific peptidase 12
chr13	26991420	26991940	*	+ 2 fold & sig. in E2	E2 vs DMSO	2.35338212080924	0.0284084954148218	Exon (ENST00000637583.1/ENST00000637583.1, exon 1 of 3)	103766	ENSG00000152484	USP12	ubiquitin specific peptidase 12
chr13	27425009	27425683	*	+ 2 fold & sig. in E2	E2 vs DMSO	2.04321721733466	0.00360513239819504	Promoter	0	ENSG00000122034	GTF3A	general transcription factor IIIA
chr13	29758575	29759049	*	+ 2 fold & sig. in E2	E2 vs DMSO	6.74668573185504	0.0131646165679802	Distal Intergenic	91568	ENSG00000122042	UBL3	ubiquitin like 3
chr13	30021066	30021564	*	+ 2 fold & sig. in E2	E2 vs DMSO	2.49436621497953	0.00313747597082147	Distal Intergenic	84843	NA	LINC00544	long intergenic non-protein coding RNA 544
chr13	30022638	30023693	*	+ 2 fold & sig. in E2	E2 vs DMSO	2.26414319199885	0.000288896466608928	Exon (ENST00000585222.1/ENST00000585222.1, exon 1 of 1)	85175	ENSG00000224511	LINC00365	long intergenic non-protein coding RNA 365
chr13	30108376	30109453	*	+ 2 fold & sig. in E2	E2 vs DMSO	2.00136312232187	9.52425567102165e-08	Promoter	0	ENSG00000224511	LINC00365	long intergenic non-protein coding RNA 365
chr13	30742945	30744479	*	+ 2 fold & sig. in E2	E2 vs DMSO	1.72829982018537	5.3545557805915e-07	Exon (ENST00000617770.4/241, exon 3 of 6)	609	ENSG00000132965	ALOX5AP	arachidonate 5-lipoxygenase activating protein
chr13	30830476	30830865	*	+ 2 fold & sig. in E2	E2 vs DMSO	2.43702433503797	0.0293461727388933	Distal Intergenic	27270	ENSG00000237879	LINC00398	long intergenic non-protein coding RNA 398
chr13	30832833	30833683	*	+ 2 fold & sig. in E2	E2 vs DMSO	1.67240001235281	0.00106511405847977	Distal Intergenic	29627	ENSG00000237879	LINC00398	long intergenic non-protein coding RNA 398
chr13	31052886	31053647	*	+ 2 fold & sig. in E2	E2 vs DMSO	1.35313948231694	0.00408068357555925	Exon (ENST00000689652.1/102723392, exon 2 of 5)	2655	NA	LOC102723392	uncharacterized LOC102723392
chr13	31073954	31074873	*	+ 2 fold & sig. in E2	E2 vs DMSO	1.37059862446032	0.00790264486721276	Intron (ENST00000425638.2/ENST00000425638.2, intron 3 of 15)	-17588	NA	LOC102723392	uncharacterized LOC102723392
chr13	31115225	31116257	*	+ 2 fold & sig. in E2	E2 vs DMSO	2.4343261831027	0.0147296447215833	Exon (ENST00000425638.2/ENST00000425638.2, exon 16 of 16)	22311	ENSG00000120694	HSPH1	heat shock protein family H (Hsp110) member 1
chr13	31600172	31600689	*	+ 2 fold & sig. in E2	E2 vs DMSO	7.75456440847651	0.00142423806158847	Distal Intergenic	-138837	ENSG00000133105	RXFP2	relaxin family peptide receptor 2
chr13	32791118	32792319	*	+ 2 fold & sig. in E2	E2 vs DMSO	1.70426304497333	2.7222482222509e-06	Distal Intergenic	20928	ENSG00000083642	PDS5B	PDS5 cohesin associated factor B
chr13	33116096	33116908	*	+ 2 fold & sig. in E2	E2 vs DMSO	1.06280992544952	0.00751369103517392	Intron (ENST00000336934.10/90627, intron 8 of 13)	-2903	ENSG00000133121	STARD13	StAR related lipid transfer domain containing 13
chr13	33350131	33350671	*	+ 2 fold & sig. in E2	E2 vs DMSO	4.27402881172808	3.39331461139172e-05	Promoter	0	ENSG00000133121	STARD13	StAR related lipid transfer domain containing 13
chr13	33648914	33649153	*	+ 2 fold & sig. in E2	E2 vs DMSO	3.28920198881935	0.0106833558815051	Intron (ENST00000686875.1/90627, intron 1 of 3)	27571	ENSG00000133121	STARD13	StAR related lipid transfer domain containing 13
chr13	33649395	33649842	*	+ 2 fold & sig. in E2	E2 vs DMSO	4.08575641615271	0.000131709793293257	Intron (ENST00000686875.1/90627, intron 1 of 3)	26882	ENSG00000133121	STARD13	StAR related lipid transfer domain containing 13
chr13	33651717	33652289	*	+ 2 fold & sig. in E2	E2 vs DMSO	4.54581505444276	1.09972125090531e-10	Intron (ENST00000686875.1/90627, intron 1 of 3)	24435	ENSG00000133121	STARD13	StAR related lipid transfer domain containing 13
chr13	33692186	33692739	*	+ 2 fold & sig. in E2	E2 vs DMSO	2.91230492708875	0.00254680316665889	Distal Intergenic	12712	NA	LOC107984551	uncharacterized LOC107984551
chr13	35716193	35716900	*	+ 2 fold & sig. in E2	E2 vs DMSO	2.59730957848517	0.000663177758716725	Distal Intergenic	18668	ENSG00000236036	LINC00445	long intergenic non-protein coding RNA 445
chr13	36028361	36029624	*	+ 2 fold & sig. in E2	E2 vs DMSO	2.2667485380464	1.44525400999073e-07	Intron (ENST00000360631.8/9201, intron 3 of 16)	101682	ENSG00000133083	DCLK1	doublecortin like kinase 1
chr13	36030845	36031314	*	+ 2 fold & sig. in E2	E2 vs DMSO	1.33975068423135	0.0462668992535308	Intron (ENST00000360631.8/9201, intron 3 of 16)	99992	ENSG00000133083	DCLK1	doublecortin like kinase 1
chr13	36062758	36063225	*	+ 2 fold & sig. in E2	E2 vs DMSO	6.61738222498732	0.0191666581565981	Intron (ENST00000360631.8/9201, intron 3 of 16)	68081	ENSG00000133083	DCLK1	doublecortin like kinase 1
chr13	36072030	36072748	*	+ 2 fold & sig. in E2	E2 vs DMSO	3.21011999998203	0.000244920591209534	Intron (ENST00000360631.8/9201, intron 3 of 16)	58558	ENSG00000133083	DCLK1	doublecortin like kinase 1
chr13	36130286	36132008	*	+ 2 fold & sig. in E2	E2 vs DMSO	3.66517817072086	8.51912942978841e-10	Promoter	0	ENSG00000133083	DCLK1	doublecortin like kinase 1
chr13	36870054	36871292	*	+ 2 fold & sig. in E2	E2 vs DMSO	1.43022537056241	0.000847588070606291	Intron (ENST00000379826.5/4093, intron 3 of 6)	8492	ENSG00000120693	SMAD9	SMAD family member 9
chr13	36882874	36883416	*	+ 2 fold & sig. in E2	E2 vs DMSO	2.70147027722686	0.00652997977717503	Intron (ENST00000379826.5/4093, intron 1 of 6)	-3090	ENSG00000120693	SMAD9	SMAD family member 9
chr13	38647210	38647779	*	+ 2 fold & sig. in E2	E2 vs DMSO	4.41320354175926	1.38269661370584e-05	Distal Intergenic	-39298	ENSG00000150893	FREM2	FRAS1 related extracellular matrix 2
chr13	38684698	38685168	*	+ 2 fold & sig. in E2	E2 vs DMSO	3.65247959030203	1.76434746080562e-08	Distal Intergenic	-1909	ENSG00000150893	FREM2	FRAS1 related extracellular matrix 2
chr13	38686006	38687534	*	+ 2 fold & sig. in E2	E2 vs DMSO	1.72500551439494	5.92120237552888e-05	Promoter	0	ENSG00000150893	FREM2	FRAS1 related extracellular matrix 2
chr13	38888302	38888872	*	+ 2 fold & sig. in E2	E2 vs DMSO	1.54184118436842	0.0228777853569966	Distal Intergenic	-60732	NA	FREM2-AS1	FREM2 antisense RNA 1
chr13	40536604	40537603	*	+ 2 fold & sig. in E2	E2 vs DMSO	2.27682908674482	8.25646297701281e-09	Promoter	-797	ENSG00000215483	LINC00598	long intergenic non-protein coding RNA 598
chr13	40540367	40540779	*	+ 2 fold & sig. in E2	E2 vs DMSO	1.63856051595542	0.0143568156126525	Intron (ENST00000636651.2/2308, intron 2 of 3)	-4560	ENSG00000215483	LINC00598	long intergenic non-protein coding RNA 598
chr13	40664803	40665791	*	+ 2 fold & sig. in E2	E2 vs DMSO	3.45677986607925	0.00019339104755931	Promoter	86	ENSG00000150907	FOXO1	forkhead box O1
chr13	40895548	40896192	*	+ 2 fold & sig. in E2	E2 vs DMSO	2.01092633101242	0.029509612662905	Intron (ENST00000652519.1/100616668, intron 2 of 6)	25464	ENSG00000239827	SUGT1P3	SUGT1 pseudogene 3
chr13	41017120	41018013	*	+ 2 fold & sig. in E2	E2 vs DMSO	1.56875022546259	0.0015694559484586	Intron (ENST00000239882.7/1997, intron 1 of 8)	1303	ENSG00000120690	ELF1	E74 like ETS transcription factor 1
chr13	41101853	41102405	*	+ 2 fold & sig. in E2	E2 vs DMSO	3.08212916253469	0.0220644506896012	Promoter	-753	ENSG00000264226	MIR3168	microRNA 3168
chr13	43153647	43154411	*	+ 2 fold & sig. in E2	E2 vs DMSO	1.95312385885569	0.0115405796425148	Distal Intergenic	-4220	NA	LINC00400	long intergenic non-protein coding RNA 400
chr13	43232201	43233420	*	+ 2 fold & sig. in E2	E2 vs DMSO	1.30680706731943	0.00652025254239691	Intron (ENST00000690772.1/55068, intron 15 of 16)	73570	NA	LINC00400	long intergenic non-protein coding RNA 400
chr13	43943872	43945213	*	+ 2 fold & sig. in E2	E2 vs DMSO	1.73964492358098	0.00379109303137853	Intron (ENST00000627615.1/144811, intron 9 of 12)	22300	ENSG00000233725	NRAD1	non-coding RNA in the aldehyde dehydrogenase 1A pathway
chr13	44108308	44109029	*	+ 2 fold & sig. in E2	E2 vs DMSO	3.27820146369847	1.36270178820992e-08	Promoter	0	NA	LINC00390	long intergenic non-protein coding RNA 390
chr13	45033662	45034268	*	+ 2 fold & sig. in E2	E2 vs DMSO	2.25783914942067	0.0324437265456065	3' UTR	2458	ENSG00000133114	GPALPP1	GPALPP motifs containing 1
chr13	45052135	45053045	*	+ 2 fold & sig. in E2	E2 vs DMSO	1.21333546993769	0.0194437275488718	Intron (ENST00000437748.2/105370188, intron 1 of 2)	20931	ENSG00000133114	GPALPP1	GPALPP motifs containing 1
chr13	46359545	46360216	*	+ 2 fold & sig. in E2	E2 vs DMSO	1.73836972949015	0.00114732469507826	3' UTR	-8538	ENSG00000102445	RUBCNL	rubicon like autophagy enhancer
chr13	46546075	46546850	*	+ 2 fold & sig. in E2	E2 vs DMSO	1.69333075700332	0.000511306435444673	Distal Intergenic	-6318	ENSG00000136141	LRCH1	leucine rich repeats and calponin homology domain containing 1
chr13	48000755	48001914	*	+ 2 fold & sig. in E2	E2 vs DMSO	1.96949695687643	9.02029585832981e-06	Promoter	0	ENSG00000136143	SUCLA2	succinate-CoA ligase ADP-forming subunit beta
chr13	48096445	48097191	*	+ 2 fold & sig. in E2	E2 vs DMSO	3.22381978641262	2.32198129212536e-09	Distal Intergenic	-1314	ENSG00000136146	MED4	mediator complex subunit 4
chr13	48590851	48591512	*	+ 2 fold & sig. in E2	E2 vs DMSO	3.97341878195595	0.000427231606030122	Promoter	-264	ENSG00000233610	LINC00462	long intergenic non-protein coding RNA 462
chr13	48679680	48680481	*	+ 2 fold & sig. in E2	E2 vs DMSO	2.80295262883702	0.0026672433239213	Intron (ENST00000614739.4/57105, intron 1 of 4)	25751	ENSG00000152207	CYSLTR2	cysteinyl leukotriene receptor 2
chr13	49233990	49234374	*	+ 2 fold & sig. in E2	E2 vs DMSO	7.56561527673744	0.000954420039374473	Exon (ENST00000610528.1/ENST00000610528.1, exon 2 of 2)	13466	NA	LOC105370203	uncharacterized LOC105370203
chr13	49569703	49570693	*	+ 2 fold & sig. in E2	E2 vs DMSO	1.65077723318632	0.00544138074693328	Intron (ENST00000378302.7/55213, intron 2 of 12)	-2380	ENSG00000136144	RCBTB1	RCC1 and BTB domain containing protein 1
chr13	49775146	49775888	*	+ 2 fold & sig. in E2	E2 vs DMSO	1.80837662906237	6.2377720214422e-05	Intron (ENST00000261667.8/3839, intron 1 of 16)	16794	ENSG00000102753	KPNA3	karyopherin subunit alpha 3
chr13	49859379	49860095	*	+ 2 fold & sig. in E2	E2 vs DMSO	2.07197477895876	0.00670641101297008	Distal Intergenic	-30496	ENSG00000181358	CTAGE10P	CTAGE family member 10, pseudogene
chr13	50149006	50149663	*	+ 2 fold & sig. in E2	E2 vs DMSO	3.05629994863272	5.68031586229397e-05	Intron (ENST00000486895.5/10301, intron 1 of 1)	-22426	NA	ST13P4	ST13, Hsp70 interacting protein pseudogene 4
chr13	50203410	50204216	*	+ 2 fold & sig. in E2	E2 vs DMSO	2.27495017531799	0.0419728480179907	Intron (ENST00000486895.5/10301, intron 1 of 1)	-17057	ENSG00000176124	DLEU1	deleted in lymphocytic leukemia 1
chr13	51905951	51907522	*	+ 2 fold & sig. in E2	E2 vs DMSO	1.2493240172536	0.000976681996348452	Distal Intergenic	26999	ENSG00000281106	TMEM272	transmembrane protein 272
chr13	51911526	51912507	*	+ 2 fold & sig. in E2	E2 vs DMSO	1.85361254065724	2.25272107520419e-05	Distal Intergenic	22014	ENSG00000281106	TMEM272	transmembrane protein 272
chr13	51921956	51922356	*	+ 2 fold & sig. in E2	E2 vs DMSO	1.74687727418039	0.00362450998279545	Distal Intergenic	12165	ENSG00000281106	TMEM272	transmembrane protein 272
chr13	51929596	51930113	*	+ 2 fold & sig. in E2	E2 vs DMSO	3.56603855330488	3.08288231639832e-05	Distal Intergenic	4408	ENSG00000281106	TMEM272	transmembrane protein 272
chr13	51935699	51936497	*	+ 2 fold & sig. in E2	E2 vs DMSO	2.77473454003748	2.14005964991525e-06	Intron (ENST00000242839.10/540, intron 19 of 20)	-1178	ENSG00000281106	TMEM272	transmembrane protein 272
chr13	51955984	51956661	*	+ 2 fold & sig. in E2	E2 vs DMSO	3.43873073354096	4.39853333418747e-09	Intron (ENST00000242839.10/540, intron 9 of 20)	3349	ENSG00000123191	ATP7B	ATPase copper transporting beta
chr13	51958128	51958657	*	+ 2 fold & sig. in E2	E2 vs DMSO	3.26998603323033	0.000157245512020695	3' UTR	1353	ENSG00000123191	ATP7B	ATPase copper transporting beta
chr13	52011329	52012408	*	+ 2 fold & sig. in E2	E2 vs DMSO	2.97283672950686	8.63441821193729e-08	Promoter	0	ENSG00000253710	ALG11	ALG11 alpha-1,2-mannosyltransferase
chr13	65214418	65215016	*	+ 2 fold & sig. in E2	E2 vs DMSO	2.14118586472845	0.000215208081938579	Distal Intergenic	-651054	NA	LINC01052	long intergenic non-protein coding RNA 1052
chr13	68685881	68686924	*	+ 2 fold & sig. in E2	E2 vs DMSO	3.91001522203429	8.51091103058802e-14	Distal Intergenic	-191456	NA	LINC02342	long intergenic non-protein coding RNA 2342
chr13	68711593	68712309	*	+ 2 fold & sig. in E2	E2 vs DMSO	3.48900162848584	1.70439044236755e-08	Distal Intergenic	-166071	NA	LINC02342	long intergenic non-protein coding RNA 2342
chr13	68745052	68746144	*	+ 2 fold & sig. in E2	E2 vs DMSO	2.77944029718606	1.32409714538045e-08	Distal Intergenic	-132236	NA	LINC02342	long intergenic non-protein coding RNA 2342
chr13	68893675	68894211	*	+ 2 fold & sig. in E2	E2 vs DMSO	6.61017610735881	0.0179099224315059	Downstream (<=300bp)	-8350	ENSG00000281778	LINC00550	long intergenic non-protein coding RNA 550
chr13	71712892	71713598	*	+ 2 fold & sig. in E2	E2 vs DMSO	1.27722597653958	0.0468615689719677	Intron (ENST00000613252.5/1602, intron 1 of 10)	-37666	ENSG00000276644	DACH1	dachshund family transcription factor 1
chr13	77605029	77605535	*	+ 2 fold & sig. in E2	E2 vs DMSO	1.96960706276314	0.0122206063399379	Intron (ENST00000535157.5/8796, intron 17 of 30)	981	ENSG00000224347	SCEL-AS1	SCEL antisense RNA 1
chr13	81874251	81875009	*	+ 2 fold & sig. in E2	E2 vs DMSO	2.58282103338922	0.00160322526567227	Distal Intergenic	623813	NA	LOC105370281	uncharacterized LOC105370281
chr13	81971196	81971829	*	+ 2 fold & sig. in E2	E2 vs DMSO	2.87910053315806	0.00269598078645387	Distal Intergenic	720758	NA	LOC105370281	uncharacterized LOC105370281
chr13	82090870	82091412	*	+ 2 fold & sig. in E2	E2 vs DMSO	1.99740545258056	0.0389716326620854	Distal Intergenic	840432	NA	LOC105370281	uncharacterized LOC105370281
chr13	82305608	82306146	*	+ 2 fold & sig. in E2	E2 vs DMSO	4.32254697605116	1.6618698596137e-07	Distal Intergenic	1055170	NA	LOC105370281	uncharacterized LOC105370281
chr13	85589308	85589887	*	+ 2 fold & sig. in E2	E2 vs DMSO	1.8097058135816	0.0318718637366066	Distal Intergenic	209532	ENSG00000184564	SLITRK6	SLIT and NTRK like family member 6
chr13	93224502	93225053	*	+ 2 fold & sig. in E2	E2 vs DMSO	2.54538185211253	0.000571302436237391	Distal Intergenic	-1754	ENSG00000183098	GPC6	glypican 6
chr13	93227105	93228530	*	+ 2 fold & sig. in E2	E2 vs DMSO	1.48702256541336	0.0224671469911228	Promoter	298	ENSG00000183098	GPC6	glypican 6
chr13	93233804	93234515	*	+ 2 fold & sig. in E2	E2 vs DMSO	2.72967960912569	7.58415551105101e-05	Intron (ENST00000377047.9/10082, intron 1 of 8)	6997	ENSG00000183098	GPC6	glypican 6
chr13	93325696	93327049	*	+ 2 fold & sig. in E2	E2 vs DMSO	1.31623271581477	0.00126803504229361	Intron (ENST00000377047.9/10082, intron 1 of 8)	98889	ENSG00000183098	GPC6	glypican 6
chr13	96238588	96239438	*	+ 2 fold & sig. in E2	E2 vs DMSO	1.01719172712075	0.00841699308265348	Intron (ENST00000376705.4/266722, intron 1 of 1)	148481	ENSG00000185352	HS6ST3	heparan sulfate 6-O-sulfotransferase 3
chr13	96540561	96541166	*	+ 2 fold & sig. in E2	E2 vs DMSO	7.45815781869299	0.00159568780035037	Intron (ENST00000376705.4/266722, intron 1 of 1)	113332	ENSG00000283487	MIR4501	microRNA 4501
chr13	98173521	98173892	*	+ 2 fold & sig. in E2	E2 vs DMSO	6.456963799324	0.0233772455625159	Intron (ENST00000595437.5/10160, intron 1 of 27)	3377	ENSG00000139797	RNF113B	ring finger protein 113B
chr13	98269437	98269799	*	+ 2 fold & sig. in E2	E2 vs DMSO	7.5987487089121	0.00101705137697975	Intron (ENST00000595437.5/10160, intron 2 of 27)	-58392	NA	LOC105370327	uncharacterized LOC105370327
chr13	98273002	98273656	*	+ 2 fold & sig. in E2	E2 vs DMSO	4.49890163393515	1.87941273818214e-05	Intron (ENST00000595437.5/10160, intron 2 of 27)	-54535	NA	LOC105370327	uncharacterized LOC105370327
chr13	98297814	98298328	*	+ 2 fold & sig. in E2	E2 vs DMSO	6.09583063037068	2.16986708097682e-14	Intron (ENST00000595437.5/10160, intron 2 of 27)	-29863	NA	LOC105370327	uncharacterized LOC105370327
chr13	98300928	98301496	*	+ 2 fold & sig. in E2	E2 vs DMSO	3.16477300539394	1.67170927237105e-08	Intron (ENST00000595437.5/10160, intron 2 of 27)	-26695	NA	LOC105370327	uncharacterized LOC105370327
chr13	98416114	98416914	*	+ 2 fold & sig. in E2	E2 vs DMSO	1.4332411074289	0.000218246803181492	Intron (ENST00000595437.5/10160, intron 16 of 27)	12043	ENSG00000152767	FARP1	FERM, ARH/RhoGEF and pleckstrin domain protein 1
chr13	98419781	98420825	*	+ 2 fold & sig. in E2	E2 vs DMSO	3.34693022518946	7.45376397943836e-13	Intron (ENST00000595437.5/10160, intron 16 of 27)	-10218	ENSG00000152767	FARP1	FERM, ARH/RhoGEF and pleckstrin domain protein 1
chr13	98506647	98507280	*	+ 2 fold & sig. in E2	E2 vs DMSO	1.80180934480365	0.0245241161845011	Intron (ENST00000539966.6/8428, intron 2 of 10)	11987	ENSG00000102572	STK24	serine/threonine kinase 24
chr13	98543880	98544569	*	+ 2 fold & sig. in E2	E2 vs DMSO	2.98779044183448	8.62428297406386e-05	Intron (ENST00000539966.6/8428, intron 1 of 10)	-21882	ENSG00000102572	STK24	serine/threonine kinase 24
chr13	98571841	98572559	*	+ 2 fold & sig. in E2	E2 vs DMSO	2.75332243303621	0.00027441469509083	Intron (ENST00000539966.6/8428, intron 1 of 10)	3645	ENSG00000102572	STK24	serine/threonine kinase 24
chr13	98659348	98659978	*	+ 2 fold & sig. in E2	E2 vs DMSO	4.85598538533144	6.14477959961766e-07	Distal Intergenic	66589	ENSG00000088386	SLC15A1	solute carrier family 15 member 1
chr13	98673028	98673606	*	+ 2 fold & sig. in E2	E2 vs DMSO	3.7895232243662	0.000796655107610225	Distal Intergenic	52961	ENSG00000088386	SLC15A1	solute carrier family 15 member 1
chr13	98784430	98785157	*	+ 2 fold & sig. in E2	E2 vs DMSO	4.2790538781486	5.35259530853242e-05	Distal Intergenic	-31758	ENSG00000088386	SLC15A1	solute carrier family 15 member 1
chr13	99979813	99981358	*	+ 2 fold & sig. in E2	E2 vs DMSO	3.95568774606557	6.6049553083036e-06	Promoter	-426	ENSG00000043355	ZIC2	Zic family member 2
chr14	100025016	100025818	*	+ 2 fold & sig. in E2	E2 vs DMSO	1.54432989423024	0.000347313266767025	Intron (ENST00000402714.6/51466, intron 1 of 13)	5440	ENSG00000196405	EVL	Enah/Vasp-like
chr14	100092837	100093323	*	+ 2 fold & sig. in E2	E2 vs DMSO	2.24950313461689	0.000272188733589202	Intron (ENST00000402714.6/51466, intron 2 of 13)	-3624	ENSG00000196405	EVL	Enah/Vasp-like
chr14	100096369	100097058	*	+ 2 fold & sig. in E2	E2 vs DMSO	2.31938401565547	3.13402284555688e-06	Promoter	0	ENSG00000196405	EVL	Enah/Vasp-like
chr14	100136971	100138048	*	+ 2 fold & sig. in E2	E2 vs DMSO	2.42221307907416	7.63531407959592e-10	Promoter	0	ENSG00000196405	EVL	Enah/Vasp-like
chr14	101226540	101227482	*	+ 2 fold & sig. in E2	E2 vs DMSO	1.89063267113514	0.000230932419060203	Distal Intergenic	-80845	NA	NA	NA
chr14	101721948	101722622	*	+ 2 fold & sig. in E2	E2 vs DMSO	1.41089815542039	0.0489050119214322	Intron (ENST00000557778.1/105370676, intron 1 of 2)	-7815	ENSG00000258512	LINC00239	long intergenic non-protein coding RNA 239
chr14	102464343	102465190	*	+ 2 fold & sig. in E2	E2 vs DMSO	1.45265328412047	0.014900104105979	Exon (ENST00000359520.12/9895, exon 17 of 20)	26066	ENSG00000196663	TECPR2	tectonin beta-propeller repeat containing 2
chr14	102472690	102473496	*	+ 2 fold & sig. in E2	E2 vs DMSO	2.1424254292466	0.000189988230520949	Intron (ENST00000359520.12/9895, intron 17 of 19)	-23385	ENSG00000196663	TECPR2	tectonin beta-propeller repeat containing 2
chr14	102880997	102881326	*	+ 2 fold & sig. in E2	E2 vs DMSO	6.4567947481818	0.0239546512596101	Intron (ENST00000392745.8/7187, intron 6 of 11)	5310	ENSG00000131323	TRAF3	TNF receptor associated factor 3
chr14	103010695	103011515	*	+ 2 fold & sig. in E2	E2 vs DMSO	1.30792256079935	0.00137106462377382	Intron (ENST00000559043.2/9578, intron 2 of 35)	-6416	ENSG00000198752	CDC42BPB	CDC42 binding protein kinase beta
chr14	103074646	103075391	*	+ 2 fold & sig. in E2	E2 vs DMSO	1.36697760922215	0.00653314549994102	Distal Intergenic	-8819	ENSG00000283071	LBHD2	LBH domain containing 2
chr14	103520422	103521763	*	+ 2 fold & sig. in E2	E2 vs DMSO	2.06076904917214	2.95313823070422e-06	Promoter	0	ENSG00000166165	CKB	creatine kinase B
chr14	103624833	103625297	*	+ 2 fold & sig. in E2	E2 vs DMSO	2.04457872863588	4.10667109603063e-06	Intron (ENST00000557172.5/3831, intron 1 of 2)	-3880	ENSG00000126214	KLC1	kinesin light chain 1
chr14	103627045	103627456	*	+ 2 fold & sig. in E2	E2 vs DMSO	1.62095323578166	0.00223195740285098	Intron (ENST00000557172.5/3831, intron 1 of 2)	-1721	ENSG00000126214	KLC1	kinesin light chain 1
chr14	103628130	103629418	*	+ 2 fold & sig. in E2	E2 vs DMSO	4.65348584329001	5.52523010291459e-12	Promoter	0	ENSG00000126214	KLC1	kinesin light chain 1
chr14	103698716	103699604	*	+ 2 fold & sig. in E2	E2 vs DMSO	1.55056952171594	1.52045171366373e-06	Promoter	-318	ENSG00000126214	KLC1	kinesin light chain 1
chr14	103715261	103715960	*	+ 2 fold & sig. in E2	E2 vs DMSO	1.54992688680954	9.21733450528579e-05	Promoter	0	ENSG00000126215	XRCC3	X-ray repair cross complementing 3
chr14	103736899	103737494	*	+ 2 fold & sig. in E2	E2 vs DMSO	2.21179610033832	0.00407318484429489	Promoter	202	ENSG00000088808	PPP1R13B	protein phosphatase 1 regulatory subunit 13B
chr14	103847511	103848945	*	+ 2 fold & sig. in E2	E2 vs DMSO	1.00407875559528	0.0337860716269722	Promoter	0	ENSG00000258735	PPP1R13B-DT	PPP1R13B divergent transcript
chr14	103853852	103854682	*	+ 2 fold & sig. in E2	E2 vs DMSO	1.54014754023477	0.00203535497967804	Exon (ENST00000556586.1/145216, exon 2 of 3)	6131	ENSG00000258735	PPP1R13B-DT	PPP1R13B divergent transcript
chr14	103879738	103880760	*	+ 2 fold & sig. in E2	E2 vs DMSO	1.18786103032309	0.0136697983774382	Exon (ENST00000658303.1/105370689, exon 4 of 4)	4683	ENSG00000287346	LOC105370689	uncharacterized LOC105370689
chr14	103882855	103883712	*	+ 2 fold & sig. in E2	E2 vs DMSO	1.41313371594142	0.00668416519095416	Distal Intergenic	7800	ENSG00000287346	LOC105370689	uncharacterized LOC105370689
chr14	103891167	103892002	*	+ 2 fold & sig. in E2	E2 vs DMSO	1.45320266041486	0.000233501336408214	Distal Intergenic	16112	ENSG00000287346	LOC105370689	uncharacterized LOC105370689
chr14	103921026	103921880	*	+ 2 fold & sig. in E2	E2 vs DMSO	1.18305217662564	0.000660162743768279	Promoter	0	ENSG00000156411	ATP5MJ	ATP synthase membrane subunit j
chr14	103925726	103926274	*	+ 2 fold & sig. in E2	E2 vs DMSO	5.27413295375777	2.09191201251306e-13	Intron (ENST00000554880.5/9556, intron 1 of 3)	1995	ENSG00000156411	ATP5MJ	ATP synthase membrane subunit j
chr14	104137438	104138479	*	+ 2 fold & sig. in E2	E2 vs DMSO	2.48093294528293	0.00224761694918927	Promoter	0	NA	KIF26A-DT	KIF26A divergent transcript
chr14	104187498	104189123	*	+ 2 fold & sig. in E2	E2 vs DMSO	1.17310594992566	0.00252136742633544	Distal Intergenic	-34461	ENSG00000258913	LINC02691	long intergenic non-protein coding RNA 2691
chr14	104503950	104504862	*	+ 2 fold & sig. in E2	E2 vs DMSO	1.50574775795918	0.000244234875397196	Intron (ENST00000415614.6/388021, intron 3 of 3)	-74902	ENSG00000184601	C14orf180	chromosome 14 open reading frame 180
chr14	105020890	105021991	*	+ 2 fold & sig. in E2	E2 vs DMSO	1.40744632190789	0.00419279716077696	Promoter	0	ENSG00000170779	CDCA4	cell division cycle associated 4
chr14	105024871	105025074	*	+ 2 fold & sig. in E2	E2 vs DMSO	6.86592054422508	0.00945596434179838	Distal Intergenic	-3788	ENSG00000170779	CDCA4	cell division cycle associated 4
chr14	105182098	105183057	*	+ 2 fold & sig. in E2	E2 vs DMSO	1.76648664812947	0.000180621895455056	Promoter	-775	ENSG00000183828	NUDT14	nudix hydrolase 14
chr14	105328278	105329485	*	+ 2 fold & sig. in E2	E2 vs DMSO	1.29293206976966	0.00081187212858397	Intron (ENST00000430725.6/23241, intron 1 of 23)	-6940	ENSG00000179364	PACS2	phosphofurin acidic cluster sorting protein 2
chr14	105537634	105539006	*	+ 2 fold & sig. in E2	E2 vs DMSO	1.46360761229331	7.94961631742931e-05	Distal Intergenic	9010	ENSG00000184986	TMEM121	transmembrane protein 121
chr14	105558961	105559847	*	+ 2 fold & sig. in E2	E2 vs DMSO	3.45712879067018	7.04618107376703e-13	Distal Intergenic	30337	ENSG00000184986	TMEM121	transmembrane protein 121
chr14	105589009	105590018	*	+ 2 fold & sig. in E2	E2 vs DMSO	2.05136739535762	9.06072529596166e-08	Distal Intergenic	-31098	ENSG00000274172	MIR8071-1	microRNA 8071-1
chr14	105602349	105603984	*	+ 2 fold & sig. in E2	E2 vs DMSO	2.11251990137765	1.56820280831757e-09	Distal Intergenic	-17132	ENSG00000274172	MIR8071-1	microRNA 8071-1
chr14	105624353	105625891	*	+ 2 fold & sig. in E2	E2 vs DMSO	1.68275559309033	3.1986769696997e-07	3' UTR	3237	ENSG00000274172	MIR8071-1	microRNA 8071-1
chr14	105643236	105643883	*	+ 2 fold & sig. in E2	E2 vs DMSO	2.25592714257388	5.60765415071153e-05	Exon (ENST00000641095.1/ENST00000641095.1, exon 3 of 6)	3068	ENSG00000277030	MIR8071-2	microRNA 8071-2
chr14	105668157	105669043	*	+ 2 fold & sig. in E2	E2 vs DMSO	2.92659926030241	4.25647130084864e-09	Exon (ENST00000390555.3/ENST00000390555.3, exon 3 of 6)	27989	ENSG00000277030	MIR8071-2	microRNA 8071-2
chr14	105679870	105680412	*	+ 2 fold & sig. in E2	E2 vs DMSO	7.91900418807171	0.000213449326639898	Distal Intergenic	39702	ENSG00000277030	MIR8071-2	microRNA 8071-2
chr14	105709339	105710847	*	+ 2 fold & sig. in E2	E2 vs DMSO	1.13293672331554	0.000112944572300898	Distal Intergenic	69171	ENSG00000277030	MIR8071-2	microRNA 8071-2
chr14	105741527	105742290	*	+ 2 fold & sig. in E2	E2 vs DMSO	2.54862259838922	6.63201245104306e-07	Exon (ENST00000390548.6/ENST00000390548.6, exon 3 of 6)	101359	ENSG00000277030	MIR8071-2	microRNA 8071-2
chr14	105768900	105769772	*	+ 2 fold & sig. in E2	E2 vs DMSO	2.58437111480095	5.12255296424048e-07	3' UTR	87800	ENSG00000265612	MIR4539	microRNA 4539
chr14	105857797	105859386	*	+ 2 fold & sig. in E2	E2 vs DMSO	1.10086953671434	0.0149162163601817	Promoter	0	ENSG00000264024	MIR4507	microRNA 4507
chr14	105914581	105915196	*	+ 2 fold & sig. in E2	E2 vs DMSO	1.48516545326617	0.042319002004401	Intron (ENST00000689219.2/9834, intron 1 of 3)	-2783	ENSG00000226777	FAM30A	family with sequence similarity 30 member A
chr14	106057942	106058907	*	+ 2 fold & sig. in E2	E2 vs DMSO	1.96428173156556	0.000385158015202704	Distal Intergenic	-85673	ENSG00000271968	ADAM6	ADAM metallopeptidase domain 6 (pseudogene)
chr14	20760793	20761647	*	+ 2 fold & sig. in E2	E2 vs DMSO	2.31749459771639	0.00554895176399888	Distal Intergenic	-6757	ENSG00000181552	EDDM3B	epididymal protein 3B
chr14	22273218	22273957	*	+ 2 fold & sig. in E2	E2 vs DMSO	4.62167353179553	2.05100600078694e-12	Intron (ENST00000656379.1/105370401, intron 3 of 3)	109212	ENSG00000251002	LOC105370401	uncharacterized LOC105370401
chr14	22886351	22887548	*	+ 2 fold & sig. in E2	E2 vs DMSO	2.69488946282097	1.05648513005204e-10	3' UTR	3129	ENSG00000139890	REM2	RRAD and GEM like GTPase 2
chr14	23646902	23647631	*	+ 2 fold & sig. in E2	E2 vs DMSO	1.234708907082	0.0371757521624179	Distal Intergenic	7563	ENSG00000100867	DHRS2	dehydrogenase/reductase 2
chr14	23664574	23664959	*	+ 2 fold & sig. in E2	E2 vs DMSO	2.63070665273941	3.20200097847655e-05	Distal Intergenic	25235	ENSG00000100867	DHRS2	dehydrogenase/reductase 2
chr14	23895744	23896324	*	+ 2 fold & sig. in E2	E2 vs DMSO	2.42519739219353	0.00482466491374647	Distal Intergenic	38244	NA	LINC00596	long intergenic non-protein coding RNA 596
chr14	24483640	24484277	*	+ 2 fold & sig. in E2	E2 vs DMSO	2.03991711994839	0.00871651887698513	Intron (ENST00000656888.1/101927045, intron 2 of 2)	23988	ENSG00000092009	CMA1	chymase 1
chr14	26319023	26319506	*	+ 2 fold & sig. in E2	E2 vs DMSO	3.09921151617598	0.000681639141049378	Distal Intergenic	-175718	NA	LINC02306	long intergenic non-protein coding RNA 2306
chr14	28141436	28142201	*	+ 2 fold & sig. in E2	E2 vs DMSO	1.29532374575238	0.00965478215360813	Distal Intergenic	-296150	ENSG00000258932	LOC728755	uncharacterized LOC728755
chr14	32509543	32510178	*	+ 2 fold & sig. in E2	E2 vs DMSO	5.0276280635712	2.11064899986651e-07	Intron (ENST00000280979.9/9472, intron 2 of 13)	14471	ENSG00000151320	AKAP6	A-kinase anchoring protein 6
chr14	33616070	33616600	*	+ 2 fold & sig. in E2	E2 vs DMSO	3.24963990372191	0.00985737815274587	Intron (ENST00000551634.6/64067, intron 4 of 10)	55885	ENSG00000151322	NPAS3	neuronal PAS domain protein 3
chr14	33714840	33715623	*	+ 2 fold & sig. in E2	E2 vs DMSO	1.19650047145458	0.0485742876279514	Intron (ENST00000551634.6/64067, intron 5 of 10)	-19591	ENSG00000151322	NPAS3	neuronal PAS domain protein 3
chr14	35340815	35342116	*	+ 2 fold & sig. in E2	E2 vs DMSO	1.38439494447227	4.79955299708501e-05	Distal Intergenic	29982	ENSG00000100902	PSMA6	proteasome 20S subunit alpha 6
chr14	35403175	35405014	*	+ 2 fold & sig. in E2	E2 vs DMSO	1.49326749601143	0.000366271386789838	Promoter	0	ENSG00000100906	NFKBIA	NFKB inhibitor alpha
chr14	36634223	36634856	*	+ 2 fold & sig. in E2	E2 vs DMSO	2.02083160976164	0.0142258139706463	Intron (ENST00000634305.1/ENST00000634305.1, intron 3 of 3)	-22712	ENSG00000198807	PAX9	paired box 9
chr14	36655804	36656900	*	+ 2 fold & sig. in E2	E2 vs DMSO	2.39467037486141	7.43328493932222e-09	Promoter	-668	ENSG00000198807	PAX9	paired box 9
chr14	36700298	36701511	*	+ 2 fold & sig. in E2	E2 vs DMSO	1.99738370665118	1.64217912245289e-06	Intron (ENST00000331299.6/89874, intron 7 of 9)	24168	ENSG00000183032	SLC25A21	solute carrier family 25 member 21
chr14	36881356	36881835	*	+ 2 fold & sig. in E2	E2 vs DMSO	6.53821735987135	0.0217192290333023	Intron (ENST00000331299.6/89874, intron 1 of 9)	70556	ENSG00000266327	MIR4503	microRNA 4503
chr14	37012696	37013489	*	+ 2 fold & sig. in E2	E2 vs DMSO	2.09586341348749	5.60831031671965e-06	Intron (ENST00000331299.6/89874, intron 1 of 9)	-60305	ENSG00000266327	MIR4503	microRNA 4503
chr14	37566658	37567417	*	+ 2 fold & sig. in E2	E2 vs DMSO	2.69287211253157	3.09778356522687e-07	Exon (ENST00000556024.1/ENST00000556024.1, exon 1 of 2)	2611	ENSG00000151338	MIPOL1	mirror-image polydactyly 1
chr14	37583410	37585477	*	+ 2 fold & sig. in E2	E2 vs DMSO	1.3530515161743	8.26675562477368e-05	Distal Intergenic	8785	ENSG00000129514	FOXA1	forkhead box A1
chr14	40816332	40816950	*	+ 2 fold & sig. in E2	E2 vs DMSO	3.16530048684923	1.26104611407286e-06	Intron (ENST00000651539.1/105370467, intron 6 of 10)	8173	NA	LOC105370467	uncharacterized LOC105370467
chr14	42214906	42215405	*	+ 2 fold & sig. in E2	E2 vs DMSO	8.22443514147229	4.54109178647393e-05	Distal Intergenic	515479	ENSG00000165379	LRFN5	leucine rich repeat and fibronectin type III domain containing 5
chr14	43420478	43420856	*	+ 2 fold & sig. in E2	E2 vs DMSO	6.19477703086874	0.0413488645746159	Distal Intergenic	111830	NA	LOC105370470	uncharacterized LOC105370470
chr14	43649493	43650184	*	+ 2 fold & sig. in E2	E2 vs DMSO	1.73031818176771	0.0138023305516422	Distal Intergenic	340845	NA	LOC105370470	uncharacterized LOC105370470
chr14	49862143	49863348	*	+ 2 fold & sig. in E2	E2 vs DMSO	1.01759355861301	0.000507400233558117	Promoter	0	NA	LOC105378179	uncharacterized LOC105378179
chr14	49867933	49868654	*	+ 2 fold & sig. in E2	E2 vs DMSO	1.86381512201779	3.93165867475231e-06	Promoter	0	NA	LOC105378179	uncharacterized LOC105378179
chr14	49879626	49880086	*	+ 2 fold & sig. in E2	E2 vs DMSO	2.90615915686161	0.0292589562846203	Distal Intergenic	-11434	NA	LOC105378179	uncharacterized LOC105378179
chr14	49892279	49893706	*	+ 2 fold & sig. in E2	E2 vs DMSO	1.17926325466959	0.00106511405847977	Promoter	0	ENSG00000165527	ARF6	ADP ribosylation factor 6
chr14	49999211	49999754	*	+ 2 fold & sig. in E2	E2 vs DMSO	2.81799002927238	2.05835588447638e-09	Intron (ENST00000635379.1/196913, intron 7 of 11)	1534	ENSG00000214900	LINC01588	long intergenic non-protein coding RNA 1588
chr14	50000645	50001943	*	+ 2 fold & sig. in E2	E2 vs DMSO	1.83611540438938	5.92557035707371e-08	Promoter	0	ENSG00000214900	LINC01588	long intergenic non-protein coding RNA 1588
chr14	50003187	50003929	*	+ 2 fold & sig. in E2	E2 vs DMSO	4.05051511390472	5.31441220933517e-10	Exon (ENST00000529902.2/283551, exon 1 of 5)	-1899	ENSG00000214900	LINC01588	long intergenic non-protein coding RNA 1588
chr14	50004746	50004984	*	+ 2 fold & sig. in E2	E2 vs DMSO	2.41942742356935	0.000513588898028703	Exon (ENST00000529902.2/283551, exon 1 of 5)	1535	ENSG00000214900	LINC01588	long intergenic non-protein coding RNA 1588
chr14	50007254	50007862	*	+ 2 fold & sig. in E2	E2 vs DMSO	1.74137751962724	0.000769883005067062	Promoter	0	ENSG00000214900	LINC01588	long intergenic non-protein coding RNA 1588
chr14	50008915	50009303	*	+ 2 fold & sig. in E2	E2 vs DMSO	1.43073592549912	0.0451239699615652	Intron (ENST00000635379.1/196913, intron 6 of 11)	-1395	ENSG00000214900	LINC01588	long intergenic non-protein coding RNA 1588
chr14	50017903	50019018	*	+ 2 fold & sig. in E2	E2 vs DMSO	3.64415079205352	2.72350376837345e-14	Intron (ENST00000635379.1/196913, intron 5 of 11)	-6514	NA	LINC01599	long intergenic non-protein coding RNA 1599
chr14	50039691	50040842	*	+ 2 fold & sig. in E2	E2 vs DMSO	2.19315785284113	3.27277360942351e-07	Promoter	0	NA	LINC01599	long intergenic non-protein coding RNA 1599
chr14	50105157	50105576	*	+ 2 fold & sig. in E2	E2 vs DMSO	2.1621930538953	0.0491564455262156	Promoter	-55	NA	LINC01599	long intergenic non-protein coding RNA 1599
chr14	50961534	50962176	*	+ 2 fold & sig. in E2	E2 vs DMSO	1.7962602523813	0.00157543573240434	Promoter	0	NA	LOC400212	uncharacterized LOC400212
chr14	53151725	53153067	*	+ 2 fold & sig. in E2	E2 vs DMSO	1.20646750722895	0.0393032548490908	Promoter	0	ENSG00000100523	DDHD1	DDHD domain containing 1
chr14	53231166	53231731	*	+ 2 fold & sig. in E2	E2 vs DMSO	2.31245111949204	0.00938805958880122	Intron (ENST00000654605.1/105370502, intron 3 of 3)	13211	NA	LOC105370504	uncharacterized LOC105370504
chr14	54565016	54566088	*	+ 2 fold & sig. in E2	E2 vs DMSO	1.07753589205216	0.0381316025372474	Promoter	-29	ENSG00000020577	SAMD4A	sterile alpha motif domain containing 4A
chr14	54901844	54903415	*	+ 2 fold & sig. in E2	E2 vs DMSO	1.52059048342029	0.0014860969013585	Promoter	0	ENSG00000131979	GCH1	GTP cyclohydrolase 1
chr14	55271159	55271527	*	+ 2 fold & sig. in E2	E2 vs DMSO	2.31495966958396	0.00609451546942901	Promoter	0	NA	FBXO34-AS1	FBXO34 antisense RNA 1
chr14	55271670	55272371	*	+ 2 fold & sig. in E2	E2 vs DMSO	3.51762319716391	4.97326530912954e-10	Promoter	0	NA	FBXO34-AS1	FBXO34 antisense RNA 1
chr14	59277899	59278586	*	+ 2 fold & sig. in E2	E2 vs DMSO	1.25286167913046	0.0149162163601817	Intron (ENST00000360909.8/23002, intron 2 of 24)	14444	ENSG00000100592	DAAM1	dishevelled associated activator of morphogenesis 1
chr14	59299216	59299523	*	+ 2 fold & sig. in E2	E2 vs DMSO	6.53553141158198	0.0211096813849716	Promoter	-192	ENSG00000100592	DAAM1	dishevelled associated activator of morphogenesis 1
chr14	59311519	59311994	*	+ 2 fold & sig. in E2	E2 vs DMSO	1.85018170168442	0.00443960224066069	Intron (ENST00000360909.8/23002, intron 3 of 24)	11804	ENSG00000100592	DAAM1	dishevelled associated activator of morphogenesis 1
chr14	59483773	59484734	*	+ 2 fold & sig. in E2	E2 vs DMSO	1.07933544349324	0.049179465902791	Promoter	0	ENSG00000126790	L3HYPDH	trans-L-3-hydroxyproline dehydratase
chr14	60091413	60092471	*	+ 2 fold & sig. in E2	E2 vs DMSO	1.03412935804066	0.0131503139433568	Promoter	0	NA	PCNX4-DT	PCNX4 divergent transcript
chr14	61280272	61281763	*	+ 2 fold & sig. in E2	E2 vs DMSO	1.67077279286541	0.000174926402931432	Promoter	0	ENSG00000182107	TMEM30B	transmembrane protein 30B
chr14	61462494	61463257	*	+ 2 fold & sig. in E2	E2 vs DMSO	1.21079947288687	0.0318417231435025	Promoter	0	ENSG00000027075	PRKCH	protein kinase C eta
chr14	61485008	61485712	*	+ 2 fold & sig. in E2	E2 vs DMSO	2.85775064247852	6.43377402813363e-07	5' UTR	-6481	ENSG00000027075	PRKCH	protein kinase C eta
chr14	61508924	61509569	*	+ 2 fold & sig. in E2	E2 vs DMSO	1.79026926681563	0.0264392290446006	Intron (ENST00000555185.5/5583, intron 2 of 3)	-15521	ENSG00000027075	PRKCH	protein kinase C eta
chr14	61513938	61514743	*	+ 2 fold & sig. in E2	E2 vs DMSO	1.83433073249065	8.77859461733726e-06	Intron (ENST00000555185.5/5583, intron 2 of 3)	-10347	ENSG00000027075	PRKCH	protein kinase C eta
chr14	61515095	61515899	*	+ 2 fold & sig. in E2	E2 vs DMSO	2.46157610694545	2.50649472349959e-08	Intron (ENST00000555185.5/5583, intron 2 of 3)	-9191	ENSG00000027075	PRKCH	protein kinase C eta
chr14	61525045	61526054	*	+ 2 fold & sig. in E2	E2 vs DMSO	1.67600770895542	5.91324467979797e-07	Promoter	0	ENSG00000027075	PRKCH	protein kinase C eta
chr14	61537453	61538263	*	+ 2 fold & sig. in E2	E2 vs DMSO	1.12689198075454	0.00307043384162535	Exon (ENST00000654868.1/105370525, exon 2 of 2)	-5099	ENSG00000027075	PRKCH	protein kinase C eta
chr14	61553649	61554637	*	+ 2 fold & sig. in E2	E2 vs DMSO	2.26198423424322	3.02142552559418e-08	Intron (ENST00000556347.1/5583, intron 3 of 3)	-8165	NA	LOC105370525	uncharacterized LOC105370525
chr14	61559165	61560060	*	+ 2 fold & sig. in E2	E2 vs DMSO	3.78414401622657	1.58049998225897e-14	Intron (ENST00000556347.1/5583, intron 3 of 3)	10134	ENSG00000250548	LINC01303	long intergenic non-protein coding RNA 1303
chr14	61568079	61569096	*	+ 2 fold & sig. in E2	E2 vs DMSO	3.14699170430961	4.42371996514404e-09	Intron (ENST00000556347.1/5583, intron 3 of 3)	1098	ENSG00000250548	LINC01303	long intergenic non-protein coding RNA 1303
chr14	61646522	61647026	*	+ 2 fold & sig. in E2	E2 vs DMSO	2.1647652626949	0.00645010172046175	Promoter	-394	ENSG00000232774	FLJ22447	uncharacterized LOC400221
chr14	61711360	61711863	*	+ 2 fold & sig. in E2	E2 vs DMSO	1.67728835014752	0.0212100781445113	Exon (ENST00000692625.1/ENST00000692625.1, exon 1 of 1)	12465	ENSG00000100644	HIF1A	hypoxia inducible factor 1 subunit alpha
chr14	61713611	61714469	*	+ 2 fold & sig. in E2	E2 vs DMSO	1.65070270685854	3.5695260163733e-05	Exon (ENST00000698331.1/105370526, exon 5 of 6)	-11952	ENSG00000100644	HIF1A	hypoxia inducible factor 1 subunit alpha
chr14	63547534	63548484	*	+ 2 fold & sig. in E2	E2 vs DMSO	3.55460637705555	3.65378328978309e-14	Distal Intergenic	3965	NA	LOC112268140	loricrin-like
chr14	63672151	63673269	*	+ 2 fold & sig. in E2	E2 vs DMSO	2.67214604018668	2.19926379681717e-10	Distal Intergenic	29998	ENSG00000274015	LOC105370532	uncharacterized LOC105370532
chr14	63852666	63853691	*	+ 2 fold & sig. in E2	E2 vs DMSO	2.29277670347831	0.0253167045055822	Promoter	0	ENSG00000054654	SYNE2	spectrin repeat containing nuclear envelope protein 2
chr14	64215822	64216738	*	+ 2 fold & sig. in E2	E2 vs DMSO	1.07254490302867	0.00450444946990139	Promoter	390	ENSG00000054654	SYNE2	spectrin repeat containing nuclear envelope protein 2
chr14	64232255	64232928	*	+ 2 fold & sig. in E2	E2 vs DMSO	2.4669017754395	1.13218477831498e-09	3' UTR	14023	ENSG00000054654	SYNE2	spectrin repeat containing nuclear envelope protein 2
chr14	64298465	64298915	*	+ 2 fold & sig. in E2	E2 vs DMSO	7.18392639304084	0.00411495591889788	5' UTR	-4055	ENSG00000140009	ESR2	estrogen receptor 2
chr14	64503414	64504980	*	+ 2 fold & sig. in E2	E2 vs DMSO	1.72538141938904	0.000466960050869885	Promoter	0	ENSG00000126804	ZBTB1	zinc finger and BTB domain containing 1
chr14	64639191	64639863	*	+ 2 fold & sig. in E2	E2 vs DMSO	1.6479576789184	0.02376745632338	Distal Intergenic	52366	ENSG00000165807	PPP1R36	protein phosphatase 1 regulatory subunit 36
chr14	65102098	65103493	*	+ 2 fold & sig. in E2	E2 vs DMSO	1.17642236132385	0.00144252498874497	Promoter	0	ENSG00000125952	MAX	MYC associated factor X
chr14	65117859	65118808	*	+ 2 fold & sig. in E2	E2 vs DMSO	4.07134142876761	1.36087041916768e-15	Distal Intergenic	-15164	ENSG00000125952	MAX	MYC associated factor X
chr14	65258259	65258878	*	+ 2 fold & sig. in E2	E2 vs DMSO	1.5623036475785	0.000770163207027886	Intron (ENST00000555736.1/ENST00000555736.1, intron 1 of 3)	-35816	ENSG00000255002	LINC02324	long intergenic non-protein coding RNA 2324
chr14	65356351	65357090	*	+ 2 fold & sig. in E2	E2 vs DMSO	1.70521125660151	4.06338979449869e-06	Distal Intergenic	-21168	ENSG00000266740	MIR4708	microRNA 4708
chr14	65506703	65507453	*	+ 2 fold & sig. in E2	E2 vs DMSO	1.55862983841167	0.00626056526087671	Intron (ENST00000360689.9/2530, intron 2 of 10)	18385	ENSG00000033170	FUT8	fucosyltransferase 8
chr14	65939938	65940602	*	+ 2 fold & sig. in E2	E2 vs DMSO	2.89004375984966	2.41576554699206e-05	Distal Intergenic	-170955	ENSG00000258502	LINC02290	long intergenic non-protein coding RNA 2290
chr14	66031831	66032621	*	+ 2 fold & sig. in E2	E2 vs DMSO	2.32533652258034	0.0063534837638011	Distal Intergenic	-78936	ENSG00000258502	LINC02290	long intergenic non-protein coding RNA 2290
chr14	66536722	66537464	*	+ 2 fold & sig. in E2	E2 vs DMSO	3.62979718712508	0.00164762518771162	Intron (ENST00000315266.9/10243, intron 1 of 21)	27663	ENSG00000171723	GPHN	gephyrin
chr14	67440050	67440993	*	+ 2 fold & sig. in E2	E2 vs DMSO	1.00070331539035	0.0236976397780267	Distal Intergenic	937	ENSG00000265993	MIR5694	microRNA 5694
chr14	67497624	67498317	*	+ 2 fold & sig. in E2	E2 vs DMSO	2.53553890589258	2.3513027271023e-06	Intron (ENST00000555638.5/161145, intron 1 of 8)	-8903	ENSG00000198133	TMEM229B	transmembrane protein 229B
chr14	67532914	67534230	*	+ 2 fold & sig. in E2	E2 vs DMSO	3.85519548002428	6.99927976661868e-12	Promoter	0	ENSG00000198133	TMEM229B	transmembrane protein 229B
chr14	68255657	68256542	*	+ 2 fold & sig. in E2	E2 vs DMSO	1.33668238320209	0.0185064316243156	Intron (ENST00000479335.5/5890, intron 8 of 11)	-125461	NA	LOC105370546	uncharacterized LOC105370546
chr14	68393240	68394073	*	+ 2 fold & sig. in E2	E2 vs DMSO	3.27090317782729	2.82419819932071e-09	Intron (ENST00000479335.5/5890, intron 9 of 11)	6103	ENSG00000182185	RAD51B	RAD51 paralog B
chr14	68458860	68459540	*	+ 2 fold & sig. in E2	E2 vs DMSO	2.18184822577073	0.000332984492466421	Intron (ENST00000479335.5/5890, intron 10 of 11)	-12493	ENSG00000182185	RAD51B	RAD51 paralog B
chr14	68473044	68473459	*	+ 2 fold & sig. in E2	E2 vs DMSO	3.97734656215363	6.96577381472457e-07	Intron (ENST00000479335.5/5890, intron 11 of 11)	1011	ENSG00000182185	RAD51B	RAD51 paralog B
chr14	68569715	68570712	*	+ 2 fold & sig. in E2	E2 vs DMSO	4.02474344473505	8.41571506159539e-16	Intron (ENST00000487861.5/5890, intron 10 of 10)	24153	ENSG00000182185	RAD51B	RAD51 paralog B
chr14	68795616	68796346	*	+ 2 fold & sig. in E2	E2 vs DMSO	2.34658368487622	3.5046064411802e-05	Promoter	0	ENSG00000185650	ZFP36L1	ZFP36 ring finger protein like 1
chr14	68816485	68816865	*	+ 2 fold & sig. in E2	E2 vs DMSO	1.72239482612373	0.0388900929822011	Distal Intergenic	-20232	ENSG00000185650	ZFP36L1	ZFP36 ring finger protein like 1
chr14	68945610	68946344	*	+ 2 fold & sig. in E2	E2 vs DMSO	2.45814941950759	6.80132964685036e-07	Intron (ENST00000394419.9/87, intron 1 of 21)	1204	ENSG00000072110	ACTN1	actinin alpha 1
chr14	68977294	68978182	*	+ 2 fold & sig. in E2	E2 vs DMSO	1.68370228447249	0.000686530797514436	Promoter	0	ENSG00000072110	ACTN1	actinin alpha 1
chr14	69855310	69856130	*	+ 2 fold & sig. in E2	E2 vs DMSO	1.48756124579575	0.00360055068664864	Intron (ENST00000555917.1/64093, intron 1 of 3)	1179	ENSG00000198732	SMOC1	SPARC related modular calcium binding 1
chr14	71475892	71476283	*	+ 2 fold & sig. in E2	E2 vs DMSO	1.87919963196474	0.0160750343061368	Intron (ENST00000553453.5/26037, intron 3 of 5)	8707	ENSG00000197555	SIPA1L1	signal induced proliferation associated 1 like 1
chr14	72262945	72263501	*	+ 2 fold & sig. in E2	E2 vs DMSO	6.10098220977826	0.041623574047191	Intron (ENST00000553525.6/9628, intron 2 of 17)	-88591	ENSG00000182732	RGS6	regulator of G protein signaling 6
[truncated: 11,120 more rows]

## Sheet: GW_H3K27ac_CUT&Tag
Table S1: Differential analysis of ER and H3K27ac CUT&Tag data, including ER-centered H3K27ac
Genome-wide H3K27ac CUT&Tag data
Chr	Start	End	Strand	Classification	Comparison	logFC	FDR	Annotation	DistanceToTSS	ENSEMBL	SYMBOL	GENENAME
chr1	1001710	1001929	*	+ 2 fold & sig. in E2	E2 vs DMSO	2.7614541531181	1.00587481636914e-05	Intron (ENST00000624697.4/9636, intron 1 of 2)	565	ENSG00000187608	ISG15	ISG15 ubiquitin like modifier
chr1	1019614	1020017	*	+ 2 fold & sig. in E2	E2 vs DMSO	3.59562189844671	4.28012588051317e-05	Promoter	-103	ENSG00000188157	AGRN	agrin
chr1	1040582	1040874	*	+ 2 fold & sig. in E2	E2 vs DMSO	2.28537391379282	0.00183974783349491	Exon (ENST00000379370.7/375790, exon 4 of 36)	-4525	ENSG00000188157	AGRN	agrin
chr1	1059056	1059892	*	+ 2 fold & sig. in E2	E2 vs DMSO	1.29704726512881	0.00119772859045165	Promoter	0	ENSG00000217801	LOC100288175	uncharacterized LOC100288175
chr1	1069186	1070064	*	+ 2 fold & sig. in E2	E2 vs DMSO	1.66957729615648	4.6292323528939e-08	Exon (ENST00000412397.2/100288175, exon 10 of 10)	4242	ENSG00000237330	RNF223	ring finger protein 223
chr1	109113785	109114511	*	+ 2 fold & sig. in E2	E2 vs DMSO	1.14027739566637	0.00213496990614579	Promoter	0	ENSG00000179902	CFAP276	cilia and flagella associated protein 276
chr1	109199239	109199789	*	+ 2 fold & sig. in E2	E2 vs DMSO	1.75632856118723	0.00214676987007192	Promoter	-402	ENSG00000116299	ELAPOR1	endosome-lysosome associated apoptosis and autophagy regulator 1
chr1	111512922	111514107	*	+ 2 fold & sig. in E2	E2 vs DMSO	1.89829887331289	1.07178459541213e-06	Intron (ENST00000369717.8/57413, intron 1 of 5)	-9289	ENSG00000121933	TMIGD3	transmembrane and immunoglobulin domain containing 3
chr1	1115826	1116994	*	+ 2 fold & sig. in E2	E2 vs DMSO	2.0958722858179	3.07338847764638e-06	Promoter	0	ENSG00000131591	C1orf159	chromosome 1 open reading frame 159
chr1	112706650	112707138	*	+ 2 fold & sig. in E2	E2 vs DMSO	1.67985641654612	0.000327050601084856	Promoter	0	ENSG00000155366	RHOC	ras homolog family member C
chr1	114033983	114034700	*	+ 2 fold & sig. in E2	E2 vs DMSO	1.07237637356318	0.0204532822239292	Exon (ENST00000632517.2/ENST00000632517.2, exon 1 of 1)	53483	ENSG00000116774	OLFML3	olfactomedin like 3
chr1	11478562	11479674	*	+ 2 fold & sig. in E2	E2 vs DMSO	2.46726806228564	4.66357018795171e-08	Promoter	0	ENSG00000204624	DISP3	dispatched RND transporter family member 3
chr1	116666580	116668166	*	+ 2 fold & sig. in E2	E2 vs DMSO	1.09677595200168	0.000174661406330402	Promoter	0	ENSG00000143061	IGSF3	immunoglobulin superfamily member 3
chr1	11680393	11681839	*	+ 2 fold & sig. in E2	E2 vs DMSO	1.04128633522079	0.000489507908207334	Promoter	0	ENSG00000116670	MAD2L2	mitotic arrest deficient 2 like 2
chr1	11979885	11980890	*	+ 2 fold & sig. in E2	E2 vs DMSO	1.18065830921172	1.80761834632783e-05	Promoter	0	ENSG00000116688	MFN2	mitofusin 2
chr1	13699348	13700347	*	+ 2 fold & sig. in E2	E2 vs DMSO	1.31233957345819	0.00249935922245442	Promoter	0	ENSG00000116731	PRDM2	PR/SET domain 2
chr1	13700394	13700851	*	+ 2 fold & sig. in E2	E2 vs DMSO	1.86605405190467	0.0074373814341427	Promoter	154	ENSG00000116731	PRDM2	PR/SET domain 2
chr1	1435443	1435669	*	+ 2 fold & sig. in E2	E2 vs DMSO	2.24416839342045	0.00012225058735966	Promoter	0	ENSG00000179403	VWA1	von Willebrand factor A domain containing 1
chr1	145215763	145216325	*	+ 2 fold & sig. in E2	E2 vs DMSO	1.67663768979051	0.0166740987657264	Promoter	0	ENSG00000263590	LINC01145	long intergenic non-protein coding RNA 1145
chr1	146228118	146229121	*	+ 2 fold & sig. in E2	E2 vs DMSO	1.36861014832106	0.00474086297342309	Promoter	0	ENSG00000271425	NBPF10	NBPF member 10
chr1	146396120	146396529	*	+ 2 fold & sig. in E2	E2 vs DMSO	2.0562484557152	0.00447538992413078	Intron (ENST00000643391.1/112268274, intron 1 of 4)	5118	NA	LOC112268274	uncharacterized LOC112268274
chr1	1472149	1472435	*	+ 2 fold & sig. in E2	E2 vs DMSO	1.993125557581	0.00954423329957002	Promoter	365	ENSG00000160072	ATAD3B	ATPase family AAA domain containing 3B
chr1	148679213	148679848	*	+ 2 fold & sig. in E2	E2 vs DMSO	1.58514593217307	0.00447866415986718	Promoter	0	ENSG00000286019	NOTCH2NLB	notch 2 N-terminal like B
chr1	149102765	149103795	*	+ 2 fold & sig. in E2	E2 vs DMSO	1.01685257721268	0.012299327288678	Promoter	0	ENSG00000269713	NBPF9	NBPF member 9
chr1	149428235	149428868	*	+ 2 fold & sig. in E2	E2 vs DMSO	1.15822208272925	0.0111276599829481	Intron (ENST00000650865.2/100996717, intron 1 of 4)	21859	ENSG00000286219	NOTCH2NLC	notch 2 N-terminal like C
chr1	150548615	150549269	*	+ 2 fold & sig. in E2	E2 vs DMSO	1.69878180155735	6.53121430378971e-06	Promoter	-100	ENSG00000143382	ADAMTSL4	ADAMTS like 4
chr1	150974854	150975125	*	+ 2 fold & sig. in E2	E2 vs DMSO	1.53608725006805	0.000155566238521282	Promoter	0	ENSG00000143418	CERS2	ceramide synthase 2
chr1	15229699	15230235	*	+ 2 fold & sig. in E2	E2 vs DMSO	1.59281320262923	0.00308400578671889	Distal Intergenic	-6286	ENSG00000142621	FHAD1	forkhead associated phosphopeptide binding domain 1
chr1	153678684	153679195	*	+ 2 fold & sig. in E2	E2 vs DMSO	1.80199200426893	0.00551161548493831	Promoter	0	ENSG00000169418	NPR1	natriuretic peptide receptor 1
chr1	154190417	154191193	*	+ 2 fold & sig. in E2	E2 vs DMSO	1.00192395379752	0.0139415496344157	Exon (ENST00000271850.11/7170, exon 2 of 9)	755	ENSG00000143549	TPM3	tropomyosin 3
chr1	154328291	154328902	*	+ 2 fold & sig. in E2	E2 vs DMSO	1.02677758538024	0.0150058822551071	Promoter	0	ENSG00000143515	ATP8B2	ATPase phospholipid transporting 8B2
chr1	155078637	155079243	*	+ 2 fold & sig. in E2	E2 vs DMSO	1.10034074986182	0.00631203012826685	Promoter	0	ENSG00000143590	EFNA3	ephrin A3
chr1	155277097	155277958	*	+ 2 fold & sig. in E2	E2 vs DMSO	1.95536268691786	1.31529921881539e-05	Promoter	0	ENSG00000143630	HCN3	hyperpolarization activated cyclic nucleotide gated potassium channel 3
chr1	15584498	15585389	*	+ 2 fold & sig. in E2	E2 vs DMSO	1.14368037459413	0.00169382652454068	Promoter	0	ENSG00000116771	AGMAT	agmatinase
chr1	15758643	15759486	*	+ 2 fold & sig. in E2	E2 vs DMSO	2.37043626668058	0.000117033962612268	Promoter	0	ENSG00000162458	FBLIM1	filamin binding LIM protein 1
chr1	159780510	159781645	*	+ 2 fold & sig. in E2	E2 vs DMSO	1.17839172005058	0.00125226611103286	Promoter	0	ENSG00000158716	DUSP23	dual specificity phosphatase 23
chr1	161565826	161566628	*	+ 2 fold & sig. in E2	E2 vs DMSO	1.07673138189894	0.0485677303654692	Intron (ENST00000537821.2/2212, intron 3 of 4)	-14711	NA	FCGR2C	Fc fragment of IgG receptor IIc (gene/pseudogene)
chr1	164748042	164749055	*	+ 2 fold & sig. in E2	E2 vs DMSO	1.9228212980931	3.46800455434264e-05	Intron (ENST00000420696.7/5087, intron 2 of 8)	-23857	ENSG00000185630	PBX1	PBX homeobox 1
chr1	164787194	164787747	*	+ 2 fold & sig. in E2	E2 vs DMSO	1.16604975758969	0.0414514578855497	Promoter	0	ENSG00000185630	PBX1	PBX homeobox 1
chr1	16498582	16499733	*	+ 2 fold & sig. in E2	E2 vs DMSO	1.70588383643122	0.00426329444604283	Promoter	0	ENSG00000080947	CROCCP3	CROCC pseudogene 3
chr1	16707426	16708235	*	+ 2 fold & sig. in E2	E2 vs DMSO	1.5656628333606	4.17738907856378e-06	Exon (ENST00000270691.9/284729, exon 2 of 11)	2384	NA	ESPNP	espin pseudogene
chr1	167553110	167554047	*	+ 2 fold & sig. in E2	E2 vs DMSO	1.17875255019556	0.00851898898265358	Promoter	0	NA	LOC107985224	uncharacterized LOC107985224
chr1	167721538	167722647	*	+ 2 fold & sig. in E2	E2 vs DMSO	1.68852642212174	3.98563542384088e-05	Promoter	0	ENSG00000197965	MPZL1	myelin protein zero like 1
chr1	17029298	17030242	*	+ 2 fold & sig. in E2	E2 vs DMSO	1.60709289695313	0.00137162153004573	Intron (ENST00000375499.8/6390, intron 3 of 7)	-6138	ENSG00000117118	SDHB	succinate dehydrogenase complex iron sulfur subunit B
chr1	17314524	17315235	*	+ 2 fold & sig. in E2	E2 vs DMSO	1.2594913985261	0.0230003178263874	Intron (ENST00000375453.5/23569, intron 1 of 3)	6327	ENSG00000159339	PADI4	peptidyl arginine deiminase 4
chr1	173476705	173477208	*	+ 2 fold & sig. in E2	E2 vs DMSO	1.58522234297705	4.30586888830084e-05	Promoter	0	ENSG00000203739	PRDX6-AS1	PRDX6 antisense RNA 1
chr1	17439834	17440103	*	+ 2 fold & sig. in E2	E2 vs DMSO	1.52566515227133	0.00599829808257525	Promoter	-157	ENSG00000179051	RCC2	regulator of chromosome condensation 2
chr1	1745649	1746668	*	+ 2 fold & sig. in E2	E2 vs DMSO	1.7638054203809	7.09823715980887e-08	Promoter	0	ENSG00000215790	SLC35E2A	solute carrier family 35 member E2A
chr1	178093372	178094790	*	+ 2 fold & sig. in E2	E2 vs DMSO	1.36654765056243	2.78093673204864e-06	Promoter	0	ENSG00000224687	RASAL2-AS1	RASAL2 antisense RNA 1
chr1	179026113	179026948	*	+ 2 fold & sig. in E2	E2 vs DMSO	2.01595840827233	3.61387531998224e-07	Promoter	219	ENSG00000116199	FAM20B	FAM20B glycosaminoglycan xylosylkinase
chr1	180229596	180230300	*	+ 2 fold & sig. in E2	E2 vs DMSO	2.72858183940368	5.20741140673017e-06	Promoter	0	ENSG00000121454	LHX4	LIM homeobox 4
chr1	180953328	180954742	*	+ 2 fold & sig. in E2	E2 vs DMSO	1.01181508762677	0.000553959227342069	Promoter	145	ENSG00000232586	KIAA1614-AS1	KIAA1614 antisense RNA 1
chr1	183022397	183024331	*	+ 2 fold & sig. in E2	E2 vs DMSO	1.76816361052726	5.6149662977977e-07	Promoter	0	ENSG00000135862	LAMC1	laminin subunit gamma 1
chr1	185044999	185046337	*	+ 2 fold & sig. in E2	E2 vs DMSO	1.10658776329432	0.000412745299682004	Promoter	0	ENSG00000121481	RNF2	ring finger protein 2
chr1	186231684	186232557	*	+ 2 fold & sig. in E2	E2 vs DMSO	3.11857796541111	3.21706044455365e-05	Distal Intergenic	7212	NA	NA	NA
chr1	1908474	1909638	*	+ 2 fold & sig. in E2	E2 vs DMSO	1.31183219301972	2.52674372539486e-05	Distal Intergenic	-5470	ENSG00000169885	CALML6	calmodulin like 6
chr1	19425899	19426294	*	+ 2 fold & sig. in E2	E2 vs DMSO	1.34651892145962	0.0240583671546835	Intron (ENST00000264202.8/832, intron 1 of 8)	-5755	ENSG00000077549	CAPZB	capping actin protein of muscle Z-line subunit beta
chr1	201495286	201495812	*	+ 2 fold & sig. in E2	E2 vs DMSO	1.36378253763244	0.00413756459742855	Promoter	489	ENSG00000159176	CSRP1	cysteine and glycine rich protein 1
chr1	201538742	201539388	*	+ 2 fold & sig. in E2	E2 vs DMSO	1.23434501292226	0.0402562115432261	Promoter	0	ENSG00000134369	NAV1	neuron navigator 1
chr1	202957622	202958759	*	+ 2 fold & sig. in E2	E2 vs DMSO	1.62989916616903	5.53991745927134e-08	Promoter	0	ENSG00000159346	ADIPOR1	adiponectin receptor 1
chr1	203088853	203090062	*	+ 2 fold & sig. in E2	E2 vs DMSO	2.21047721215792	4.13497519877923e-06	Promoter	-592	ENSG00000163485	ADORA1	adenosine A1 receptor
chr1	206684781	206685159	*	+ 2 fold & sig. in E2	E2 vs DMSO	1.56522612212292	0.00352463567099401	Promoter	0	ENSG00000162889	MAPKAPK2	MAPK activated protein kinase 2
chr1	206908950	206910060	*	+ 2 fold & sig. in E2	E2 vs DMSO	1.75872095910672	8.87778246535024e-07	Promoter	0	ENSG00000162894	FCMR	Fc fragment of IgM receptor
chr1	210233010	210234526	*	+ 2 fold & sig. in E2	E2 vs DMSO	1.06642669302772	0.00600911910938842	Promoter	0	NA	SERTAD4-AS1	SERTAD4 antisense RNA 1
chr1	211416109	211417251	*	+ 2 fold & sig. in E2	E2 vs DMSO	1.5081654032672	0.00422026739974154	Exon (ENST00000441817.2/ENST00000441817.2, exon 1 of 2)	16851	ENSG00000153363	LINC00467	long intergenic non-protein coding RNA 467
chr1	211830258	211831087	*	+ 2 fold & sig. in E2	E2 vs DMSO	1.83546309212166	0.00107233388825332	Promoter	0	ENSG00000229258	LPGAT1-AS1	LPGAT1 antisense RNA 1
chr1	212138376	212139390	*	+ 2 fold & sig. in E2	E2 vs DMSO	1.88018392865892	0.000166196373388886	Distal Intergenic	37730	ENSG00000143476	DTL	denticleless E3 ubiquitin protein ligase homolog
chr1	212432720	212433669	*	+ 2 fold & sig. in E2	E2 vs DMSO	1.30186152312587	0.025346697841204	Promoter	0	NA	LOC105372906	uncharacterized LOC105372906
chr1	223142473	223143489	*	+ 2 fold & sig. in E2	E2 vs DMSO	1.14409360359104	0.0062958508699814	Promoter	0	ENSG00000187554	TLR5	toll like receptor 5
chr1	223364524	223365039	*	+ 2 fold & sig. in E2	E2 vs DMSO	2.06205098103108	0.0130341557099542	Promoter	-291	ENSG00000143502	SUSD4	sushi domain containing 4
chr1	223712281	223713029	*	+ 2 fold & sig. in E2	E2 vs DMSO	1.96263508600715	0.00134571979099917	Promoter	0	ENSG00000162909	CAPN2	calpain 2
chr1	223845290	223845933	*	+ 2 fold & sig. in E2	E2 vs DMSO	2.16308308559198	0.000270612381814512	Promoter	0	ENSG00000143514	TP53BP2	tumor protein p53 binding protein 2
chr1	224182928	224184261	*	+ 2 fold & sig. in E2	E2 vs DMSO	1.33896447953351	0.000201802360089433	Promoter	0	ENSG00000143753	DEGS1	delta 4-desaturase, sphingolipid 1
chr1	226110045	226111048	*	+ 2 fold & sig. in E2	E2 vs DMSO	2.29298975111564	1.80781713306015e-07	Distal Intergenic	23081	NA	LINC01703	long intergenic non-protein coding RNA 1703
chr1	226870242	226871223	*	+ 2 fold & sig. in E2	E2 vs DMSO	1.56991038774021	0.000330649389210351	Promoter	0	NA	LOC107985354	uncharacterized LOC107985354
chr1	227734672	227735822	*	+ 2 fold & sig. in E2	E2 vs DMSO	1.09461366681788	0.000719630650945801	Promoter	0	ENSG00000143740	SNAP47	synaptosome associated protein 47
chr1	228735020	228736563	*	+ 2 fold & sig. in E2	E2 vs DMSO	1.34583697264793	0.000209361951335006	Promoter	0	ENSG00000116574	RHOU	ras homolog family member U
chr1	229164845	229165723	*	+ 2 fold & sig. in E2	E2 vs DMSO	1.69693310179207	0.00445688087864924	Intron (ENST00000662083.1/105373158, intron 1 of 4)	18372	NA	LINC02815	long intergenic non-protein coding RNA 2815
chr1	229270899	229271767	*	+ 2 fold & sig. in E2	E2 vs DMSO	1.80901030549671	0.000246381498124463	Promoter	0	ENSG00000177788	LOC105373159	uncharacterized LOC105373159
chr1	229341908	229343282	*	+ 2 fold & sig. in E2	E2 vs DMSO	1.92876732635287	5.94324194004632e-06	Promoter	0	ENSG00000154429	CCSAP	centriole, cilia and spindle associated protein
chr1	230067142	230068565	*	+ 2 fold & sig. in E2	E2 vs DMSO	1.32660494101064	0.000131210104072694	Promoter	0	ENSG00000143641	GALNT2	polypeptide N-acetylgalactosaminyltransferase 2
chr1	23168264	23168972	*	+ 2 fold & sig. in E2	E2 vs DMSO	2.34851300923841	0.000947504824993689	Promoter	0	ENSG00000169641	LUZP1	leucine zipper protein 1
chr1	233327069	233328997	*	+ 2 fold & sig. in E2	E2 vs DMSO	2.04639334768255	1.10396134188153e-06	Promoter	0	ENSG00000143674	MAP3K21	mitogen-activated protein kinase kinase kinase 21
chr1	234609229	234609451	*	+ 2 fold & sig. in E2	E2 vs DMSO	4.56593967877604	2.97547792164646e-06	Promoter	74	ENSG00000168264	IRF2BP2	interferon regulatory factor 2 binding protein 2
chr1	234963328	234964429	*	+ 2 fold & sig. in E2	E2 vs DMSO	1.17077656181879	0.000253911738430882	Promoter	0	ENSG00000238005	LOC101927851	uncharacterized LOC101927851
chr1	236142514	236143063	*	+ 2 fold & sig. in E2	E2 vs DMSO	1.32471242107251	0.0148784881558863	Promoter	0	ENSG00000077585	GPR137B	G protein-coupled receptor 137B
chr1	241519031	241520012	*	+ 2 fold & sig. in E2	E2 vs DMSO	1.35936158407943	4.97025154536994e-05	Promoter	0	ENSG00000091483	FH	fumarate hydratase
chr1	244652460	244653772	*	+ 2 fold & sig. in E2	E2 vs DMSO	1.41826350709117	2.36718545313331e-05	Promoter	0	ENSG00000121644	DESI2	desumoylating isopeptidase 2
chr1	24570488	24570820	*	+ 2 fold & sig. in E2	E2 vs DMSO	1.4229494456289	0.0266733503489606	Intron (ENST00000374392.3/400746, intron 1 of 3)	14401	ENSG00000184454	NCMAP	non-compact myelin associated protein
chr1	246931513	246932290	*	+ 2 fold & sig. in E2	E2 vs DMSO	1.04414936949872	0.00389369528486423	Promoter	0	ENSG00000153207	AHCTF1	AT-hook containing transcription factor 1
chr1	247111387	247112201	*	+ 2 fold & sig. in E2	E2 vs DMSO	3.11563023615265	0.000260890703486744	Promoter	216	ENSG00000221953	LINC02897	long intergenic non-protein coding RNA 2897
chr1	24744908	24745902	*	+ 2 fold & sig. in E2	E2 vs DMSO	1.36860357243928	1.66411519172125e-05	Promoter	0	ENSG00000169504	CLIC4	chloride intracellular channel 4
chr1	25476180	25476640	*	+ 2 fold & sig. in E2	E2 vs DMSO	2.04707905893394	0.0214126060659834	Intron (ENST00000399766.7/55219, intron 4 of 8)	27287	ENSG00000204178	MACO1	macoilin 1
chr1	25543316	25544415	*	+ 2 fold & sig. in E2	E2 vs DMSO	2.11319743824997	0.000240022189727687	Promoter	0	ENSG00000157978	LDLRAP1	low density lipoprotein receptor adaptor protein 1
chr1	26696054	26696449	*	+ 2 fold & sig. in E2	E2 vs DMSO	3.44382682385386	0.00049514862467813	Promoter	0	ENSG00000117713	ARID1A	AT-rich interaction domain 1A
chr1	27392259	27392892	*	+ 2 fold & sig. in E2	E2 vs DMSO	1.16765204875292	0.0176468939738116	Promoter	0	ENSG00000181773	GPR3	G protein-coupled receptor 3
chr1	27603207	27603696	*	+ 2 fold & sig. in E2	E2 vs DMSO	2.18182030480736	0.000171394916214671	Promoter	0	ENSG00000126705	AHDC1	AT-hook DNA binding motif containing 1
chr1	27659539	27660396	*	+ 2 fold & sig. in E2	E2 vs DMSO	1.91735266902182	0.000440684281189653	Exon (ENST00000440492.1/111216282, exon 2 of 2)	2326	ENSG00000233975	LINC02574	long intergenic non-protein coding RNA 2574
chr1	27725352	27726573	*	+ 2 fold & sig. in E2	E2 vs DMSO	1.48455490167994	3.13132159200103e-06	Promoter	0	ENSG00000009780	FAM76A	family with sequence similarity 76 member A
chr1	29124313	29125157	*	+ 2 fold & sig. in E2	E2 vs DMSO	1.03858623028302	0.0118201058714115	Promoter	-410	ENSG00000253304	TMEM200B	transmembrane protein 200B
chr1	29236525	29236841	*	+ 2 fold & sig. in E2	E2 vs DMSO	3.05038424092144	0.00211649048648713	Promoter	0	ENSG00000060656	PTPRU	protein tyrosine phosphatase receptor type U
chr1	30302915	30303310	*	+ 2 fold & sig. in E2	E2 vs DMSO	1.68853433902075	0.039696064546621	Distal Intergenic	-265303	ENSG00000233399	LINC01648	long intergenic non-protein coding RNA 1648
chr1	3069573	3070210	*	+ 2 fold & sig. in E2	E2 vs DMSO	3.32074357990725	3.31726076087988e-05	Promoter	362	ENSG00000142611	PRDM16	PR/SET domain 16
chr1	31186613	31187167	*	+ 2 fold & sig. in E2	E2 vs DMSO	1.4293685237643	0.00547026732647776	Intron (ENST00000373736.7/79570, intron 2 of 6)	986	ENSG00000084628	NKAIN1	sodium/potassium transporting ATPase interacting 1
chr1	31830090	31831026	*	+ 2 fold & sig. in E2	E2 vs DMSO	1.05437127634134	0.0281853826314036	Distal Intergenic	-14068	ENSG00000134668	SPOCD1	SPOC domain containing 1
chr1	32335915	32336412	*	+ 2 fold & sig. in E2	E2 vs DMSO	2.64854738668288	1.71911429899923e-05	Promoter	0	ENSG00000175130	MARCKSL1	MARCKS like 1
chr1	32361396	32362620	*	+ 2 fold & sig. in E2	E2 vs DMSO	2.17396418255316	5.21988366933473e-06	Promoter	0	ENSG00000225828	FAM229A	family with sequence similarity 229 member A
chr1	32500005	32501335	*	+ 2 fold & sig. in E2	E2 vs DMSO	1.55758836978767	0.0006553496507497	Intron (ENST00000480336.1/653121, intron 4 of 9)	34933	ENSG00000273274	ZBTB8B	zinc finger and BTB domain containing 8B
chr1	32964538	32965127	*	+ 2 fold & sig. in E2	E2 vs DMSO	1.94833184283913	0.000186823890050817	Promoter	0	ENSG00000116514	RNF19B	ring finger protein 19B
chr1	33348877	33349653	*	+ 2 fold & sig. in E2	E2 vs DMSO	1.57629049886261	0.000330315919798462	Promoter	0	ENSG00000134686	PHC2	polyhomeotic homolog 2
chr1	3454688	3455081	*	+ 2 fold & sig. in E2	E2 vs DMSO	1.72308550318283	0.000371887731236947	Promoter	23	ENSG00000130762	ARHGEF16	Rho guanine nucleotide exchange factor 16
chr1	3553334	3553898	*	+ 2 fold & sig. in E2	E2 vs DMSO	1.07627616791832	0.0220253552529666	Intron (ENST00000356575.9/1953, intron 4 of 36)	6892	ENSG00000207776	MIR551A	microRNA 551a
chr1	35718437	35719303	*	+ 2 fold & sig. in E2	E2 vs DMSO	1.44660693732551	0.000733208617813677	Promoter	0	ENSG00000142686	C1orf216	chromosome 1 open reading frame 216
chr1	3624169	3625901	*	+ 2 fold & sig. in E2	E2 vs DMSO	1.3273526028345	0.000170367748326353	Promoter	0	ENSG00000158109	TPRG1L	tumor protein p63 regulated 1 like
chr1	3640150	3641048	*	+ 2 fold & sig. in E2	E2 vs DMSO	1.3886048119811	0.0065086387074553	Promoter	-525	ENSG00000116213	WRAP73	WD repeat containing, antisense to TP73
chr1	3649500	3650120	*	+ 2 fold & sig. in E2	E2 vs DMSO	1.07414492277793	0.0320638357483333	Promoter	0	ENSG00000116213	WRAP73	WD repeat containing, antisense to TP73
chr1	37038151	37039131	*	+ 2 fold & sig. in E2	E2 vs DMSO	1.21944715038611	0.000209955465149142	Distal Intergenic	-3636	ENSG00000163873	GRIK3	glutamate ionotropic receptor kainate type subunit 3
chr1	3772303	3773242	*	+ 2 fold & sig. in E2	E2 vs DMSO	1.58653945205288	0.000243140389680415	Promoter	0	ENSG00000235169	SMIM1	small integral membrane protein 1 (Vel blood group)
chr1	37752353	37753531	*	+ 2 fold & sig. in E2	E2 vs DMSO	1.44241981022075	0.00369092317723739	Promoter	0	ENSG00000183317	EPHA10	EPH receptor A10
chr1	37793137	37794256	*	+ 2 fold & sig. in E2	E2 vs DMSO	2.5363476873532	2.2027550447426e-07	Promoter	0	ENSG00000185090	MANEAL	mannosidase endo-alpha like
chr1	40979291	40980568	*	+ 2 fold & sig. in E2	E2 vs DMSO	1.29008003655468	2.59937351544932e-05	Promoter	0	ENSG00000171793	CTPS1	CTP synthase 1
chr1	41241313	41242126	*	+ 2 fold & sig. in E2	E2 vs DMSO	3.25878195764327	1.59607979445249e-06	Promoter	0	NA	LOC102723924	uncharacterized LOC102723924
chr1	41361957	41362166	*	+ 2 fold & sig. in E2	E2 vs DMSO	2.9303073122687	9.52829712430237e-05	Promoter	26	ENSG00000281518	FOXO6	forkhead box O6
chr1	41778382	41778840	*	+ 2 fold & sig. in E2	E2 vs DMSO	3.33514428796358	0.00113908631129141	Intron (ENST00000372584.5/59269, intron 1 of 7)	90790	ENSG00000127124	HIVEP3	HIVEP zinc finger 3
chr1	41789556	41790503	*	+ 2 fold & sig. in E2	E2 vs DMSO	1.29773837206199	0.00215903242480893	Intron (ENST00000372584.5/59269, intron 1 of 7)	79127	ENSG00000127124	HIVEP3	HIVEP zinc finger 3
chr1	42683008	42683432	*	+ 2 fold & sig. in E2	E2 vs DMSO	1.15359708918354	0.0353982012070519	Promoter	0	ENSG00000065978	YBX1	Y-box binding protein 1
chr1	43452875	43454172	*	+ 2 fold & sig. in E2	E2 vs DMSO	1.1542206189363	0.00276158939666446	Promoter	0	NA	HYI-AS1	HYI antisense RNA 1
chr1	44354552	44355628	*	+ 2 fold & sig. in E2	E2 vs DMSO	1.09047140004228	0.00310143633529705	Promoter	0	ENSG00000117419	ERI3	ERI1 exoribonuclease family member 3
chr1	45010435	45011590	*	+ 2 fold & sig. in E2	E2 vs DMSO	1.22348520507135	0.000327804272578422	Promoter	0	ENSG00000126088	UROD	uroporphyrinogen decarboxylase
chr1	45802751	45804358	*	+ 2 fold & sig. in E2	E2 vs DMSO	1.22925817237421	0.000255951831729945	Promoter	0	ENSG00000086015	MAST2	microtubule associated serine/threonine kinase 2
chr1	47894737	47895856	*	+ 2 fold & sig. in E2	E2 vs DMSO	1.73452820754451	0.00258744454022471	Intron (ENST00000606738.3/388630, intron 2 of 6)	98356	ENSG00000269113	TRABD2B	TraB domain containing 2B
chr1	52368558	52368778	*	+ 2 fold & sig. in E2	E2 vs DMSO	1.56538542360859	0.0105937715209275	Exon (ENST00000497678.2/ENST00000497678.2, exon 1 of 1)	-2353	ENSG00000154222	CC2D1B	coiled-coil and C2 domain containing 1B
chr1	52726211	52727323	*	+ 2 fold & sig. in E2	E2 vs DMSO	1.28239699110627	0.00408497077857424	Promoter	0	ENSG00000162378	ZYG11B	zyg-11 family member B, cell cycle regulator
chr1	53945392	53946729	*	+ 2 fold & sig. in E2	E2 vs DMSO	1.25726727404583	9.55927039830662e-05	Promoter	0	ENSG00000116212	LRRC42	leucine rich repeat containing 42
chr1	5991786	5992737	*	+ 2 fold & sig. in E2	E2 vs DMSO	2.55025439366153	5.8011026174621e-09	Promoter	0	ENSG00000131697	NPHP4	nephrocystin 4
chr1	64469897	64471027	*	+ 2 fold & sig. in E2	E2 vs DMSO	1.18019404540702	0.0211542408965037	Promoter	0	ENSG00000158966	CACHD1	cache domain containing 1
chr1	64744384	64745173	*	+ 2 fold & sig. in E2	E2 vs DMSO	1.57251533299762	0.0127556289272041	Promoter	0	ENSG00000162437	RAVER2	ribonucleoprotein, PTB binding 2
chr1	64989457	64989927	*	+ 2 fold & sig. in E2	E2 vs DMSO	1.47417901224754	0.0123930041468456	Promoter	135	ENSG00000226891	LINC01359	long intergenic non-protein coding RNA 1359
chr1	65044046	65045128	*	+ 2 fold & sig. in E2	E2 vs DMSO	1.41217819403443	8.40256450887812e-05	5' UTR	12714	ENSG00000265996	MIR3671	microRNA 3671
chr1	65066482	65067471	*	+ 2 fold & sig. in E2	E2 vs DMSO	1.85645426000025	7.45037448877152e-06	Promoter	143	ENSG00000162434	JAK1	Janus kinase 1
chr1	65147647	65149374	*	+ 2 fold & sig. in E2	E2 vs DMSO	1.65520338437985	2.5987027123051e-05	Promoter	0	ENSG00000162433	AK4	adenylate kinase 4
chr1	6784215	6785445	*	+ 2 fold & sig. in E2	E2 vs DMSO	1.76544712728636	3.94037979816552e-07	Promoter	0	NA	CAMTA1-DT	CAMTA1 divergent transcript
chr1	6959262	6960111	*	+ 2 fold & sig. in E2	E2 vs DMSO	1.48315367992811	0.000285976486345376	Intron (ENST00000303635.12/23261, intron 3 of 22)	85206	ENSG00000171735	CAMTA1	calmodulin binding transcription activator 1
chr1	6960197	6960855	*	+ 2 fold & sig. in E2	E2 vs DMSO	1.13504817236578	0.0203205696890839	Intron (ENST00000303635.12/23261, intron 3 of 22)	86141	ENSG00000171735	CAMTA1	calmodulin binding transcription activator 1
chr1	7446973	7448536	*	+ 2 fold & sig. in E2	E2 vs DMSO	1.86760526954827	3.46511005733945e-07	Intron (ENST00000303635.12/23261, intron 5 of 22)	-5419	NA	CAMTA1-AS1	CAMTA1 antisense RNA 1
chr1	74652249	74653385	*	+ 2 fold & sig. in E2	E2 vs DMSO	2.04318327734015	1.0510142929642e-06	Intron (ENST00000326665.10/127254, intron 1 of 14)	-17394	ENSG00000178965	ERICH3	glutamate rich 3
chr1	84077589	84078878	*	+ 2 fold & sig. in E2	E2 vs DMSO	1.13729782339608	0.010415168204156	Promoter	0	ENSG00000142875	PRKACB	protein kinase cAMP-activated catalytic subunit beta
chr1	84996829	84997756	*	+ 2 fold & sig. in E2	E2 vs DMSO	1.41321510169735	0.0154580476361641	Promoter	0	ENSG00000153898	MCOLN2	mucolipin TRP cation channel 2
chr1	85047916	85048988	*	+ 2 fold & sig. in E2	E2 vs DMSO	1.29061183332145	0.0126367176800714	Promoter	0	ENSG00000055732	MCOLN3	mucolipin TRP cation channel 3
chr1	85495114	85495894	*	+ 2 fold & sig. in E2	E2 vs DMSO	1.17865559320692	0.0332393463001745	Promoter	387	ENSG00000153904	DDAH1	dimethylarginine dimethylaminohydrolase 1
chr1	85576427	85577100	*	+ 2 fold & sig. in E2	E2 vs DMSO	1.66877054420524	0.00142259299243107	Promoter	0	NA	NA	NA
chr1	8702928	8703767	*	+ 2 fold & sig. in E2	E2 vs DMSO	1.60826214838832	0.000145621566107809	Promoter	0	ENSG00000142599	RERE	arginine-glutamic acid dipeptide repeats
chr1	9234751	9235074	*	+ 2 fold & sig. in E2	E2 vs DMSO	7.22594456475568	4.44004486645402e-05	Promoter	0	ENSG00000049239	H6PD	hexose-6-phosphate dehydrogenase/glucose 1-dehydrogenase
chr1	93908565	93909778	*	+ 2 fold & sig. in E2	E2 vs DMSO	2.29738362792088	5.47345676819093e-06	Promoter	0	ENSG00000023909	GCLM	glutamate-cysteine ligase modifier subunit
chr1	94236901	94238001	*	+ 2 fold & sig. in E2	E2 vs DMSO	1.62980832044434	0.00162816703550629	Promoter	0	ENSG00000137962	ARHGAP29	Rho GTPase activating protein 29
chr10	100999019	100999744	*	+ 2 fold & sig. in E2	E2 vs DMSO	1.70031205089526	6.1811809541144e-06	Promoter	0	ENSG00000107816	LZTS2	leucine zipper tumor suppressor 2
chr10	102120293	102120980	*	+ 2 fold & sig. in E2	E2 vs DMSO	1.6372503964001	1.17337080987779e-05	Promoter	0	ENSG00000198728	LDB1	LIM domain binding 1
chr10	102399323	102399643	*	+ 2 fold & sig. in E2	E2 vs DMSO	1.4962019270375	0.00108995616935668	Promoter	0	ENSG00000077150	NFKB2	nuclear factor kappa B subunit 2
[truncated: 5,861 more rows]

## Sheet: ERcentered_H3K27ac_CUT&Tag
Table S1: Differential analysis of ER and H3K27ac CUT&Tag data, including ER-centered H3K27ac
[truncated: 5,916 more rows]
