# Supplementary material for: The impact of Fulvestrant on Estrogen Receptor-Driven Chromatin Dynamics in Breast Cancer
Source: Research Square preprint supplement (doi:10.21203/rs.3.rs-6779056/v1), 2025-06-06
Supplement: Supplementary file 2 [file fe6b319e732597e689269d25.xlsx]

## Sheet: ATACseq
Table S2: Differential analysis of ATAC-seq data
Chr	Start	End	Strand	Classification	Comparison	logFC	FDR	Annotation	DistanceToTSS	ENSEMBL	SYMBOL	GENENAME
chr1	102833008	102833484	*	+ 2 fold & sig. in E2	E2 vs DMSO	1.10791407268605	0.00200424695791283	Intron (ENST00000414418.1/112268286, intron 1 of 6)	20358	NA	LOC112268286	uncharacterized LOC112268286
chr1	1069894	1070371	*	+ 2 fold & sig. in E2	E2 vs DMSO	1.06590448756824	3.03674289590703e-05	Distal Intergenic	3935	ENSG00000237330	RNF223	ring finger protein 223
chr1	107164876	107165153	*	+ 2 fold & sig. in E2	E2 vs DMSO	1.37219336616606	0.0247598539993803	Intron (ENST00000370073.6/22854, intron 2 of 7)	16282	ENSG00000162631	NTNG1	netrin G1
chr1	107420503	107420874	*	+ 2 fold & sig. in E2	E2 vs DMSO	1.81217891007532	0.000237265002942435	Intron (ENST00000370073.6/22854, intron 5 of 7)	159700	ENSG00000162631	NTNG1	netrin G1
chr1	10751235	10751418	*	+ 2 fold & sig. in E2	E2 vs DMSO	1.59675645761348	0.00190685617751282	Intron (ENST00000377022.8/54897, intron 2 of 20)	45228	ENSG00000130940	CASZ1	castor zinc finger 1
chr1	10752388	10752695	*	+ 2 fold & sig. in E2	E2 vs DMSO	2.23794229798888	9.00972075636636e-07	Intron (ENST00000377022.8/54897, intron 2 of 20)	43951	ENSG00000130940	CASZ1	castor zinc finger 1
chr1	107842187	107842463	*	+ 2 fold & sig. in E2	E2 vs DMSO	1.44189476740043	0.00806064623043289	Intron (ENST00000370056.9/10451, intron 2 of 26)	-21291	ENSG00000134215	VAV3	vav guanine nucleotide exchange factor 3
chr1	109199206	109199617	*	+ 2 fold & sig. in E2	E2 vs DMSO	3.00495098442406	6.09939149905256e-08	Promoter	-574	ENSG00000116299	ELAPOR1	endosome-lysosome associated apoptosis and autophagy regulator 1
chr1	112869385	112869641	*	+ 2 fold & sig. in E2	E2 vs DMSO	1.20916055657168	0.0439911235588632	Intron (ENST00000658577.2/ENST00000658577.2, intron 1 of 1)	-18742	ENSG00000215866	LINC01356	long intergenic non-protein coding RNA 1356
chr1	113660357	113660882	*	+ 2 fold & sig. in E2	E2 vs DMSO	1.72438024246913	0.00712495043871945	Intron (ENST00000307546.14/260425, intron 16 of 20)	45099	ENSG00000116793	PHTF1	putative homeodomain transcription factor 1
chr1	115815770	115816090	*	+ 2 fold & sig. in E2	E2 vs DMSO	1.24735225050647	0.00094002605533727	Distal Intergenic	24651	ENSG00000177551	NHLH2	nescient helix-loop-helix 2
chr1	116123695	116124209	*	+ 2 fold & sig. in E2	E2 vs DMSO	1.34317310512516	0.00209564826493866	Promoter	0	ENSG00000173212	MAB21L3	mab-21 like 3
chr1	116492173	116492422	*	+ 2 fold & sig. in E2	E2 vs DMSO	1.7672983298623	1.90630666168035e-05	Promoter	-928	NA	LOC112268235	uncharacterized LOC112268235
chr1	116652663	116653117	*	+ 2 fold & sig. in E2	E2 vs DMSO	2.34082183040737	2.19016819948335e-06	Intron (ENST00000369483.5/3321, intron 2 of 11)	-5718	ENSG00000143061	IGSF3	immunoglobulin superfamily member 3
chr1	119373525	119373787	*	+ 2 fold & sig. in E2	E2 vs DMSO	1.67372001620394	0.000995218959619473	Intron (ENST00000457318.5/51179, intron 1 of 4)	4579	ENSG00000230921	HAO2-IT1	HAO2 intronic transcript 1
chr1	12600218	12600681	*	+ 2 fold & sig. in E2	E2 vs DMSO	2.83691698390979	3.39729285769269e-08	Intron (ENST00000616661.5/9249, intron 1 of 5)	-3910	ENSG00000162496	DHRS3	dehydrogenase/reductase 3
chr1	145708068	145708491	*	+ 2 fold & sig. in E2	E2 vs DMSO	1.21608733453461	0.000264388501641536	Promoter	0	ENSG00000174827	PDZK1	PDZ domain containing 1
chr1	146178722	146178919	*	+ 2 fold & sig. in E2	E2 vs DMSO	1.65056026962773	0.00309672945007237	Intron (ENST00000612520.2/100132406, intron 2 of 20)	-33918	ENSG00000271425	NBPF10	NBPF member 10
chr1	148376625	148376963	*	+ 2 fold & sig. in E2	E2 vs DMSO	2.07012010671518	0.000142486585104299	Intron (ENST00000638958.1/105371225, intron 1 of 6)	-11319	ENSG00000278596	MIR6077	microRNA 6077
chr1	150017372	150017803	*	+ 2 fold & sig. in E2	E2 vs DMSO	1.46680992310473	0.000262624980484119	Distal Intergenic	-6646	ENSG00000264522	OTUD7B	OTU deubiquitinase 7B
chr1	152147810	152148269	*	+ 2 fold & sig. in E2	E2 vs DMSO	1.56378459968541	0.044268644313364	Intron (ENST00000628080.1/ENST00000628080.1, intron 1 of 1)	10959	ENSG00000215853	RPTN	repetin
chr1	156985759	156986005	*	+ 2 fold & sig. in E2	E2 vs DMSO	1.5854992459079	0.021227261896824	Exon (ENST00000497704.3/ENST00000497704.3, exon 1 of 1)	-13934	ENSG00000132694	ARHGEF11	Rho guanine nucleotide exchange factor 11
chr1	162165994	162166155	*	+ 2 fold & sig. in E2	E2 vs DMSO	1.31867399993069	0.0267992552662399	Intron (ENST00000361897.10/9722, intron 2 of 9)	8705	NA	LOC105371475	uncharacterized LOC105371475
chr1	162329855	162330304	*	+ 2 fold & sig. in E2	E2 vs DMSO	1.52214431337715	0.00174672201867903	Intron (ENST00000361897.10/9722, intron 4 of 9)	-12061	NA	NA	NA
chr1	177218209	177218414	*	+ 2 fold & sig. in E2	E2 vs DMSO	2.3382670716784	0.0176519243927893	Intron (ENST00000361539.5/57795, intron 1 of 7)	-38367	ENSG00000198797	BRINP2	BMP/retinoic acid inducible neural specific 2
chr1	177476630	177477080	*	+ 2 fold & sig. in E2	E2 vs DMSO	1.6713145724147	0.000207283665660621	Intron (ENST00000663166.1/ENST00000663166.1, intron 4 of 4)	125050	ENSG00000224968	LINC01645	long intergenic non-protein coding RNA 1645
chr1	17879028	17879229	*	+ 2 fold & sig. in E2	E2 vs DMSO	2.16007338469616	0.0130799273490563	Distal Intergenic	56046	ENSG00000117148	ACTL8	actin like 8
chr1	181133493	181133943	*	+ 2 fold & sig. in E2	E2 vs DMSO	1.35151591917333	3.34688917678171e-06	Distal Intergenic	-40541	ENSG00000237292	LINC01732	long intergenic non-protein coding RNA 1732
chr1	183222915	183223274	*	+ 2 fold & sig. in E2	E2 vs DMSO	1.71748772250165	0.00267012257034334	Exon (ENST00000493293.5/3918, exon 7 of 22)	-16227	ENSG00000058085	LAMC2	laminin subunit gamma 2
chr1	193457789	193458060	*	+ 2 fold & sig. in E2	E2 vs DMSO	1.28612664515842	0.0357160586377291	Promoter	297	NA	NA	NA
chr1	19425824	19426122	*	+ 2 fold & sig. in E2	E2 vs DMSO	2.35497726006323	7.82415453084952e-06	Intron (ENST00000264202.8/832, intron 1 of 8)	-5680	ENSG00000077549	CAPZB	capping actin protein of muscle Z-line subunit beta
chr1	19427158	19427505	*	+ 2 fold & sig. in E2	E2 vs DMSO	1.49811406776423	9.53432247481218e-05	Intron (ENST00000264202.8/832, intron 1 of 8)	-7014	ENSG00000077549	CAPZB	capping actin protein of muscle Z-line subunit beta
chr1	19448623	19448794	*	+ 2 fold & sig. in E2	E2 vs DMSO	1.44760298402183	0.00877093070032295	Intron (ENST00000264202.8/832, intron 1 of 8)	-28479	ENSG00000077549	CAPZB	capping actin protein of muscle Z-line subunit beta
chr1	202335344	202335881	*	+ 2 fold & sig. in E2	E2 vs DMSO	1.34728946407783	0.00287478112644098	5' UTR	6044	ENSG00000077152	UBE2T	ubiquitin conjugating enzyme E2 T
chr1	203059346	203059716	*	+ 2 fold & sig. in E2	E2 vs DMSO	2.06699352644062	0.00488265023312262	Intron (ENST00000688357.1/8497, intron 20 of 29)	-1650	ENSG00000143847	PPFIA4	PTPRF interacting protein alpha 4
chr1	203101691	203102246	*	+ 2 fold & sig. in E2	E2 vs DMSO	1.74426286278765	0.0026281080850174	Intron (ENST00000309502.7/134, intron 2 of 5)	11037	ENSG00000163485	ADORA1	adenosine A1 receptor
chr1	203514266	203514573	*	+ 2 fold & sig. in E2	E2 vs DMSO	1.17046584826683	0.000172462728763099	Distal Intergenic	18296	ENSG00000188770	OPTC	opticin
chr1	203600149	203600408	*	+ 2 fold & sig. in E2	E2 vs DMSO	1.9052261386378	0.00947717656611021	Distal Intergenic	-26424	ENSG00000058668	ATP2B4	ATPase plasma membrane Ca2+ transporting 4
chr1	204130291	204130556	*	+ 2 fold & sig. in E2	E2 vs DMSO	1.1408324383888	0.000186459851864498	Distal Intergenic	7905	ENSG00000143842	SOX13	SRY-box transcription factor 13
chr1	206898550	206898900	*	+ 2 fold & sig. in E2	E2 vs DMSO	1.28730931905749	0.000208244512487417	Intron (ENST00000391929.7/11009, intron 2 of 6)	717	ENSG00000162892	IL24	interleukin 24
chr1	20869664	20870080	*	+ 2 fold & sig. in E2	E2 vs DMSO	1.62584251699742	0.00959246671856416	Intron (ENST00000374935.7/8672, intron 16 of 32)	-18396	ENSG00000075151	EIF4G3	eukaryotic translation initiation factor 4 gamma 3
chr1	211113666	211113924	*	+ 2 fold & sig. in E2	E2 vs DMSO	1.35147846810272	0.00770712623715569	Intron (ENST00000367007.5/3756, intron 1 of 11)	-10151	ENSG00000143473	KCNH1	potassium voltage-gated channel subfamily H member 1
chr1	211521473	211521750	*	+ 2 fold & sig. in E2	E2 vs DMSO	2.08548762227489	0.00138152944303013	Distal Intergenic	-29311	ENSG00000198570	RD3	RD3 regulator of GUCY2D
chr1	21212170	21212414	*	+ 2 fold & sig. in E2	E2 vs DMSO	1.24109140924054	0.025028575868061	Distal Intergenic	9667	ENSG00000117298	ECE1	endothelin converting enzyme 1
chr1	21242282	21242560	*	+ 2 fold & sig. in E2	E2 vs DMSO	1.86197362742714	0.000308764455601465	Intron (ENST00000415912.6/1889, intron 10 of 18)	-3932	ENSG00000117298	ECE1	endothelin converting enzyme 1
chr1	214327578	214327781	*	+ 2 fold & sig. in E2	E2 vs DMSO	1.71338633629131	0.0118605017228563	Promoter	84	ENSG00000143499	SMYD2	SET and MYND domain containing 2
chr1	214700418	214701132	*	+ 2 fold & sig. in E2	E2 vs DMSO	1.16219420628022	0.0232828264659559	Distal Intergenic	45270	ENSG00000117724	CENPF	centromere protein F
chr1	215425235	215425451	*	+ 2 fold & sig. in E2	E2 vs DMSO	1.40666156267503	0.0192558504965056	Distal Intergenic	-141853	ENSG00000136636	KCTD3	potassium channel tetramerization domain containing 3
chr1	215473775	215473935	*	+ 2 fold & sig. in E2	E2 vs DMSO	2.54583681295834	0.00791268647752852	Distal Intergenic	-93369	ENSG00000136636	KCTD3	potassium channel tetramerization domain containing 3
chr1	215473982	215474273	*	+ 2 fold & sig. in E2	E2 vs DMSO	1.73577757710526	0.000166379254812401	Distal Intergenic	-93031	ENSG00000136636	KCTD3	potassium channel tetramerization domain containing 3
chr1	217124455	217124740	*	+ 2 fold & sig. in E2	E2 vs DMSO	1.18904713139317	0.00236518561926811	Intron (ENST00000366940.6/2104, intron 1 of 8)	13014	ENSG00000196482	ESRRG	estrogen related receptor gamma
chr1	218044083	218044333	*	+ 2 fold & sig. in E2	E2 vs DMSO	2.03257324521726	0.0398331968635959	Exon (ENST00000456026.1/101929631, exon 1 of 4)	578	ENSG00000232100	LINC01653	long intergenic non-protein coding RNA 1653
chr1	218436965	218437233	*	+ 2 fold & sig. in E2	E2 vs DMSO	1.64807446595906	0.00456608339814943	Intron (ENST00000366930.9/7042, intron 5 of 6)	2839	ENSG00000092969	TGFB2	transforming growth factor beta 2
chr1	22288840	22289246	*	+ 2 fold & sig. in E2	E2 vs DMSO	1.21641112930288	0.0395754178471216	Distal Intergenic	22601	ENSG00000266564	MIR4418	microRNA 4418
chr1	22469525	22469797	*	+ 2 fold & sig. in E2	E2 vs DMSO	1.67941918202874	0.000269493720098434	Intron (ENST00000650433.1/9923, intron 1 of 8)	17658	ENSG00000184677	ZBTB40	zinc finger and BTB domain containing 40
chr1	225450576	225450815	*	+ 2 fold & sig. in E2	E2 vs DMSO	1.81828783057887	2.7540886161381e-06	Exon (ENST00000651771.1/105373110, exon 3 of 4)	14468	NA	LINC02765	long intergenic non-protein coding RNA 2765
chr1	226310654	226310940	*	+ 2 fold & sig. in E2	E2 vs DMSO	1.0849190391507	0.0369062291361767	Promoter	-785	ENSG00000183814	LIN9	lin-9 DREAM MuvB core complex component
chr1	226448379	226448754	*	+ 2 fold & sig. in E2	E2 vs DMSO	1.89856936605867	0.000441664629039143	Distal Intergenic	-40225	ENSG00000143799	PARP1	poly(ADP-ribose) polymerase 1
chr1	226638449	226638931	*	+ 2 fold & sig. in E2	E2 vs DMSO	1.14554683955115	0.0215735657233945	Intron (ENST00000272117.8/3707, intron 6 of 7)	20739	NA	ITPKB-IT1	ITPKB intronic transcript 1
chr1	229382033	229382253	*	+ 2 fold & sig. in E2	E2 vs DMSO	1.65161556021352	0.0449318874485436	Distal Intergenic	-25108	NA	NA	NA
chr1	230500480	230500807	*	+ 2 fold & sig. in E2	E2 vs DMSO	2.60062613511974	0.000275260719905131	Intron (ENST00000689608.1/105373164, intron 2 of 3)	73894	NA	LOC105373164	uncharacterized LOC105373164
chr1	233677783	233677998	*	+ 2 fold & sig. in E2	E2 vs DMSO	1.58611744471575	0.0049821216346065	Distal Intergenic	22088	ENSG00000135750	KCNK1	potassium two pore domain channel subfamily K member 1
chr1	234668264	234668711	*	+ 2 fold & sig. in E2	E2 vs DMSO	1.66717999639273	0.000142486585104299	Intron (ENST00000664534.1/105373209, intron 1 of 2)	-5385	NA	LOC105373209	uncharacterized LOC105373209
chr1	235006733	235007224	*	+ 2 fold & sig. in E2	E2 vs DMSO	1.81754318817751	0.000201799542036401	Distal Intergenic	-36671	ENSG00000238005	LOC101927851	uncharacterized LOC101927851
chr1	2350819	2351077	*	+ 2 fold & sig. in E2	E2 vs DMSO	1.42301930072436	0.0420884454261905	Exon (ENST00000602865.1/100129534, exon 1 of 1)	780	ENSG00000269896	LOC100129534	small nuclear ribonucleoprotein polypeptide N pseudogene
chr1	241801246	241801428	*	+ 2 fold & sig. in E2	E2 vs DMSO	1.96887673692601	0.0165971517599393	3' UTR	30791	ENSG00000162843	WDR64	WD repeat domain 64
chr1	244254129	244254347	*	+ 2 fold & sig. in E2	E2 vs DMSO	1.21032665552919	0.0451340557209458	Distal Intergenic	70830	NA	LOC105373262	uncharacterized LOC105373262
chr1	26268939	26269205	*	+ 2 fold & sig. in E2	E2 vs DMSO	1.34217484741858	0.012429716355385	Promoter	-85	ENSG00000130695	CEP85	centrosomal protein 85
chr1	28068752	28069018	*	+ 2 fold & sig. in E2	E2 vs DMSO	1.38067759014448	0.0393821240307905	Intron (ENST00000373871.8/2140, intron 1 of 17)	-10665	ENSG00000158161	EYA3	EYA transcriptional coactivator and phosphatase 3
chr1	31186652	31187193	*	+ 2 fold & sig. in E2	E2 vs DMSO	1.45853081190579	2.00787299364816e-05	Intron (ENST00000373736.7/79570, intron 2 of 6)	960	ENSG00000084628	NKAIN1	sodium/potassium transporting ATPase interacting 1
chr1	31238723	31238954	*	+ 2 fold & sig. in E2	E2 vs DMSO	1.46677478242443	0.0224961973092875	Intron (ENST00000373736.7/79570, intron 1 of 6)	933	ENSG00000084628	NKAIN1	sodium/potassium transporting ATPase interacting 1
chr1	31258673	31258964	*	+ 2 fold & sig. in E2	E2 vs DMSO	1.56602642977165	0.00391582925559709	Distal Intergenic	2113	ENSG00000060688	SNRNP40	small nuclear ribonucleoprotein U5 subunit 40
chr1	31368563	31369138	*	+ 2 fold & sig. in E2	E2 vs DMSO	1.37042543594649	4.85895499983801e-05	Promoter	452	ENSG00000121769	FABP3	fatty acid binding protein 3
chr1	33660399	33660771	*	+ 2 fold & sig. in E2	E2 vs DMSO	1.51437951007742	0.0028695549756505	Intron (ENST00000373381.9/114784, intron 26 of 70)	-33815	ENSG00000121904	CSMD2	CUB and Sushi multiple domains 2
chr1	35593408	35594016	*	+ 2 fold & sig. in E2	E2 vs DMSO	1.13172233005668	0.00935582243558739	Intron (ENST00000373235.4/339488, intron 6 of 6)	5451	ENSG00000116819	TFAP2E	transcription factor AP-2 epsilon
chr1	3677268	3677523	*	+ 2 fold & sig. in E2	E2 vs DMSO	2.03049072099553	0.00727466485318059	Intron (ENST00000378295.9/7161, intron 1 of 13)	-4843	ENSG00000078900	TP73	tumor protein p73
chr1	37793255	37793535	*	+ 2 fold & sig. in E2	E2 vs DMSO	2.2687817253606	1.56678191775199e-06	Promoter	-312	ENSG00000185090	MANEAL	mannosidase endo-alpha like
chr1	41415548	41415750	*	+ 2 fold & sig. in E2	E2 vs DMSO	1.37423589093497	0.00177007311336545	Distal Intergenic	-39879	ENSG00000229901	FOXO6-AS1	FOXO6 antisense RNA 1
chr1	41778295	41778805	*	+ 2 fold & sig. in E2	E2 vs DMSO	2.78630834626959	2.89823493183121e-08	Intron (ENST00000372584.5/59269, intron 1 of 7)	90825	ENSG00000127124	HIVEP3	HIVEP zinc finger 3
chr1	41860164	41860578	*	+ 2 fold & sig. in E2	E2 vs DMSO	1.20401201182934	5.75893780442342e-05	Intron (ENST00000372584.5/59269, intron 1 of 7)	9052	ENSG00000127124	HIVEP3	HIVEP zinc finger 3
chr1	41866340	41866531	*	+ 2 fold & sig. in E2	E2 vs DMSO	2.24617124833874	1.02821349865718e-06	Intron (ENST00000372584.5/59269, intron 1 of 7)	3099	ENSG00000127124	HIVEP3	HIVEP zinc finger 3
chr1	42973400	42973771	*	+ 2 fold & sig. in E2	E2 vs DMSO	1.6987700549585	0.0106074884326953	Intron (ENST00000431759.6/440584, intron 2 of 3)	14300	ENSG00000227533	SLC2A1-DT	SLC2A1 divergent transcript
chr1	43835151	43835450	*	+ 2 fold & sig. in E2	E2 vs DMSO	1.30773147217768	0.00188821574989421	Intron (ENST00000645057.1/9682, intron 18 of 25)	-2800	ENSG00000126091	ST3GAL3	ST3 beta-galactoside alpha-2,3-sialyltransferase 3
chr1	44067575	44067958	*	+ 2 fold & sig. in E2	E2 vs DMSO	2.40117283111627	3.15022252499491e-05	Intron (ENST00000434244.5/128209, intron 5 of 6)	16382	ENSG00000171872	KLF17	Kruppel like factor 17
chr1	45059878	45060324	*	+ 2 fold & sig. in E2	E2 vs DMSO	1.40007275336309	0.00274014245903242	Exon (ENST00000359600.6/57643, exon 3 of 14)	45331	ENSG00000126088	UROD	uroporphyrinogen decarboxylase
chr1	51306915	51307359	*	+ 2 fold & sig. in E2	E2 vs DMSO	2.39723545682164	1.57302032485137e-05	Intron (ENST00000447632.6/22996, intron 6 of 17)	-1322	ENSG00000085831	TTC39A	tetratricopeptide repeat domain 39A
chr1	51321380	51321864	*	+ 2 fold & sig. in E2	E2 vs DMSO	2.38187810066844	6.83586478763926e-06	Promoter	346	ENSG00000085831	TTC39A	tetratricopeptide repeat domain 39A
chr1	52658779	52658971	*	+ 2 fold & sig. in E2	E2 vs DMSO	1.40698488780767	0.00226715063179044	Intron (ENST00000440303.5/348378, intron 2 of 4)	25186	ENSG00000182183	SHISAL2A	shisa like 2A
chr1	59667107	59667278	*	+ 2 fold & sig. in E2	E2 vs DMSO	1.81808883836746	0.00971836957718347	Intron (ENST00000634606.1/55277, intron 10 of 16)	-6379	ENSG00000172456	FGGY	FGGY carbohydrate kinase domain containing
chr1	7110314	7110798	*	+ 2 fold & sig. in E2	E2 vs DMSO	1.97747727429325	1.26061867096256e-05	Intron (ENST00000303635.12/23261, intron 4 of 22)	236258	ENSG00000171735	CAMTA1	calmodulin binding transcription activator 1
chr1	76944052	76944419	*	+ 2 fold & sig. in E2	E2 vs DMSO	1.7220679792111	0.00184593124223284	Intron (ENST00000318803.6/81849, intron 2 of 4)	-51038	ENSG00000117069	ST6GALNAC5	ST6 N-acetylgalactosaminide alpha-2,6-sialyltransferase 5
chr1	93599298	93599776	*	+ 2 fold & sig. in E2	E2 vs DMSO	1.19354600760176	0.0157302844502805	Exon (ENST00000446684.1/100129046, exon 3 of 3)	4908	NA	BCAR3-AS1	BCAR3 antisense RNA 1
chr10	100035603	100035876	*	+ 2 fold & sig. in E2	E2 vs DMSO	1.63813293162852	0.00191617902645078	Distal Intergenic	-25656	ENSG00000107554	DNMBP	dynamin binding protein
chr10	100883262	100883729	*	+ 2 fold & sig. in E2	E2 vs DMSO	1.4148957426688	0.000920229327937039	Distal Intergenic	-29234	ENSG00000119906	SLF2	SMC5-SMC6 complex localization factor 2
chr10	101601468	101601841	*	+ 2 fold & sig. in E2	E2 vs DMSO	1.8979114732107	0.000258365462536138	Promoter	0	ENSG00000283558	MIR3158-2	microRNA 3158-2
chr10	101938515	101938687	*	+ 2 fold & sig. in E2	E2 vs DMSO	1.76989069352975	0.0121045337807273	Intron (ENST00000370033.9/79591, intron 23 of 25)	-48779	ENSG00000120029	ARMH3	armadillo like helical domain containing 3
chr10	108445821	108446285	*	+ 2 fold & sig. in E2	E2 vs DMSO	1.50274473209953	0.00116620654712725	Distal Intergenic	-247972	ENSG00000229981	LINC01435	long intergenic non-protein coding RNA 1435
chr10	110789670	110790307	*	+ 2 fold & sig. in E2	E2 vs DMSO	2.0034067030948	0.00019523111510524	Intron (ENST00000369519.4/282996, intron 5 of 13)	-33281	ENSG00000203867	RBM20	RNA binding motif protein 20
chr10	113966997	113967367	*	+ 2 fold & sig. in E2	E2 vs DMSO	1.0480695019957	0.0459433400666665	Distal Intergenic	-76499	ENSG00000043591	ADRB1	adrenoceptor beta 1
chr10	114055315	114055557	*	+ 2 fold & sig. in E2	E2 vs DMSO	1.26712275912567	0.0180659413834742	Distal Intergenic	11449	ENSG00000043591	ADRB1	adrenoceptor beta 1
chr10	114239068	114239412	*	+ 2 fold & sig. in E2	E2 vs DMSO	1.43588887494689	0.0137615218363975	Promoter	0	ENSG00000165816	VWA2	von Willebrand factor A domain containing 2
chr10	118625554	118625850	*	+ 2 fold & sig. in E2	E2 vs DMSO	1.36491418032225	0.00534350816984227	Distal Intergenic	-29906	ENSG00000119973	PRLHR	prolactin releasing hormone receptor
chr10	123636756	123637482	*	+ 2 fold & sig. in E2	E2 vs DMSO	2.18225617345659	4.50872445302395e-06	Distal Intergenic	-28873	ENSG00000154478	GPR26	G protein-coupled receptor 26
chr10	123783378	123783636	*	+ 2 fold & sig. in E2	E2 vs DMSO	1.74202179844552	0.00402799418015865	Intron (ENST00000368854.7/119587, intron 7 of 19)	6708	NA	LOC105378533	uncharacterized LOC105378533
chr10	123799111	123799563	*	+ 2 fold & sig. in E2	E2 vs DMSO	1.11964479035074	0.0364676101314479	5' UTR	22441	NA	LOC105378533	uncharacterized LOC105378533
chr10	124305186	124305336	*	+ 2 fold & sig. in E2	E2 vs DMSO	1.69996783427178	0.0235424818492042	Distal Intergenic	98000	ENSG00000065154	OAT	ornithine aminotransferase
chr10	125701602	125701893	*	+ 2 fold & sig. in E2	E2 vs DMSO	1.49406771211299	0.000916328455169859	Intron (ENST00000596068.5/283038, intron 4 of 5)	2741	ENSG00000228021	LOC283038	uncharacterized LOC283038
chr10	125928348	125928538	*	+ 2 fold & sig. in E2	E2 vs DMSO	2.13533531734613	0.00272202117410228	Intron (ENST00000368693.6/92565, intron 1 of 10)	31784	ENSG00000203780	FANK1	fibronectin type III and ankyrin repeat domains 1
chr10	126175933	126176128	*	+ 2 fold & sig. in E2	E2 vs DMSO	1.73155147306508	0.0298876979964104	Intron (ENST00000368679.8/8038, intron 3 of 22)	-20628	ENSG00000148848	ADAM12	ADAM metallopeptidase domain 12
chr10	126543563	126544037	*	+ 2 fold & sig. in E2	E2 vs DMSO	1.82144783129592	0.00430061138607002	Intron (ENST00000488181.3/118611, intron 2 of 9)	-18740	ENSG00000154493	C10orf90	chromosome 10 open reading frame 90
chr10	126918321	126918827	*	+ 2 fold & sig. in E2	E2 vs DMSO	1.86985834647596	8.71599486853032e-05	Intron (ENST00000280333.9/1793, intron 1 of 51)	12893	ENSG00000150760	DOCK1	dedicator of cytokinesis 1
chr10	126955422	126955764	*	+ 2 fold & sig. in E2	E2 vs DMSO	1.24883114123156	0.0317073578978393	Intron (ENST00000280333.9/1793, intron 1 of 51)	49994	ENSG00000150760	DOCK1	dedicator of cytokinesis 1
chr10	127923000	127923367	*	+ 2 fold & sig. in E2	E2 vs DMSO	1.24168820184561	0.00245121799678344	Intron (ENST00000254667.8/5791, intron 1 of 20)	11150	NA	NA	NA
chr10	128194856	128195073	*	+ 2 fold & sig. in E2	E2 vs DMSO	1.9446670348004	0.00201349988388561	Intron (ENST00000626518.2/101927381, intron 1 of 3)	13720	ENSG00000280953	LINC01163	long intergenic non-protein coding RNA 1163
chr10	132539456	132539730	*	+ 2 fold & sig. in E2	E2 vs DMSO	1.04506324651011	0.0185892735661033	Intron (ENST00000368594.8/3632, intron 1 of 15)	1317	ENSG00000068383	INPP5A	inositol polyphosphate-5-phosphatase A
chr10	132741914	132742142	*	+ 2 fold & sig. in E2	E2 vs DMSO	2.25387603721445	0.0140768627412411	Intron (ENST00000368594.8/3632, intron 9 of 15)	-23682	ENSG00000068383	INPP5A	inositol polyphosphate-5-phosphatase A
chr10	17063189	17063375	*	+ 2 fold & sig. in E2	E2 vs DMSO	1.38072869491055	0.0236093420429863	Intron (ENST00000377833.10/8029, intron 22 of 66)	64462	ENSG00000107611	CUBN	cubilin
chr10	19232364	19232649	*	+ 2 fold & sig. in E2	E2 vs DMSO	1.119279353004	0.0465306674873067	Intron (ENST00000454679.7/340895, intron 18 of 39)	28514	ENSG00000204740	MALRD1	MAM and LDL receptor class A domain containing 1
chr10	22598544	22598790	*	+ 2 fold & sig. in E2	E2 vs DMSO	1.73830686969319	0.000613720724852092	Intron (ENST00000376573.9/5305, intron 3 of 9)	-6831	ENSG00000150867	PIP4K2A	phosphatidylinositol-5-phosphate 4-kinase type 2 alpha
chr10	22599108	22599603	*	+ 2 fold & sig. in E2	E2 vs DMSO	1.39241674585989	0.00236759151395079	Intron (ENST00000376573.9/5305, intron 3 of 9)	-7395	ENSG00000150867	PIP4K2A	phosphatidylinositol-5-phosphate 4-kinase type 2 alpha
chr10	26982196	26982408	*	+ 2 fold & sig. in E2	E2 vs DMSO	1.1415430372462	0.0217985539155675	Intron (ENST00000675439.1/22852, intron 4 of 5)	32134	ENSG00000107890	ANKRD26	ankyrin repeat domain 26
chr10	29421568	29421858	*	+ 2 fold & sig. in E2	E2 vs DMSO	1.96049376685678	0.0353277603584665	Exon (ENST00000427063.8/102724316, exon 3 of 3)	11325	ENSG00000224597	SVIL-AS1	SVIL antisense RNA 1
chr10	29821078	29821357	*	+ 2 fold & sig. in E2	E2 vs DMSO	1.56342253468352	0.00162232833129203	Distal Intergenic	21906	NA	LOC107984172	uncharacterized LOC107984172
chr10	31819370	31819526	*	+ 2 fold & sig. in E2	E2 vs DMSO	1.95787405007091	0.0202898285117868	Intron (ENST00000344936.7/94134, intron 12 of 19)	7448	ENSG00000165322	ARHGAP12	Rho GTPase activating protein 12
chr10	3289359	3289590	*	+ 2 fold & sig. in E2	E2 vs DMSO	1.39166837559718	0.0215150995087101	Distal Intergenic	-11710	NA	NA	NA
chr10	33066745	33067229	*	+ 2 fold & sig. in E2	E2 vs DMSO	1.10355982114436	0.0103219047113762	Intron (ENST00000450890.5/101929475, intron 3 of 3)	49443	NA	IATPR	ITGB1 adjacent tumor promoting lncRNA
chr10	4279707	4279956	*	+ 2 fold & sig. in E2	E2 vs DMSO	1.24982071525375	0.00051576166940244	Distal Intergenic	-35795	NA	LINC00702	long intergenic non-protein coding RNA 702
chr10	43038057	43038371	*	+ 2 fold & sig. in E2	E2 vs DMSO	2.29760517259851	0.000121311038291529	Distal Intergenic	-38693	ENSG00000165731	RET	ret proto-oncogene
chr10	43131899	43132228	*	+ 2 fold & sig. in E2	E2 vs DMSO	1.9310405805979	0.0171706715223624	Distal Intergenic	-6217	ENSG00000169826	CSGALNACT2	chondroitin sulfate N-acetylgalactosaminyltransferase 2
chr10	44642131	44642356	*	+ 2 fold & sig. in E2	E2 vs DMSO	1.61728235483346	0.0088280658761788	Distal Intergenic	-40027	NA	NA	NA
chr10	48519017	48519545	*	+ 2 fold & sig. in E2	E2 vs DMSO	1.41167707185679	0.018462769769412	Intron (ENST00000374170.5/58504, intron 1 of 5)	4691	ENSG00000128805	ARHGAP22	Rho GTPase activating protein 22
chr10	5496476	5496867	*	+ 2 fold & sig. in E2	E2 vs DMSO	1.23119350722108	4.45048268780617e-05	Distal Intergenic	2703	ENSG00000178372	CALML5	calmodulin like 5
chr10	56665129	56665288	*	+ 2 fold & sig. in E2	E2 vs DMSO	1.63716082482641	0.0131776872890118	Distal Intergenic	-69098	NA	NA	NA
chr10	60031503	60031870	*	+ 2 fold & sig. in E2	E2 vs DMSO	1.5943070564769	0.000571549601667863	Intron (ENST00000280772.7/288, intron 43 of 43)	12933	ENSG00000151150	ANK3	ankyrin 3
chr10	6153312	6153649	*	+ 2 fold & sig. in E2	E2 vs DMSO	1.44152750857599	0.000162003392685708	Intron (ENST00000379789.8/5209, intron 1 of 14)	-1050	ENSG00000283634	MIR3155B	microRNA 3155b
chr10	62842936	62843350	*	+ 2 fold & sig. in E2	E2 vs DMSO	1.59635520423271	0.000490602224675262	Intron (ENST00000493899.2/107984012, intron 6 of 7)	-23769	ENSG00000122877	EGR2	early growth response 2
chr10	68811565	68811936	*	+ 2 fold & sig. in E2	E2 vs DMSO	1.53299047788761	0.0111461542491596	Distal Intergenic	-15595	ENSG00000165730	STOX1	storkhead box 1
chr10	69319901	69320145	*	+ 2 fold & sig. in E2	E2 vs DMSO	1.18533452184718	0.0156388019633728	Intron (ENST00000436817.6/3098, intron 4 of 20)	1012	ENSG00000156515	HK1	hexokinase 1
chr10	69421872	69422246	*	+ 2 fold & sig. in E2	E2 vs DMSO	1.84935083155194	1.79791222588445e-06	Distal Intergenic	-4954	ENSG00000075073	TACR2	tachykinin receptor 2
chr10	70081357	70081774	*	+ 2 fold & sig. in E2	E2 vs DMSO	1.67009180190367	0.000933186331113005	Intron (ENST00000676699.1/55506, intron 2 of 7)	5757	ENSG00000099284	MACROH2A2	macroH2A.2 histone
chr10	74929283	74929442	*	+ 2 fold & sig. in E2	E2 vs DMSO	1.47967814209358	0.0352225121710524	Intron (ENST00000648725.1/23522, intron 3 of 17)	-46504	ENSG00000156650	KAT6B	lysine acetyltransferase 6B
chr10	75062802	75063023	*	+ 2 fold & sig. in E2	E2 vs DMSO	1.34311196486886	0.0488167751331499	Intron (ENST00000338487.6/338599, intron 1 of 3)	10619	ENSG00000188716	DUSP29	dual specificity phosphatase 29
chr10	75121497	75121647	*	+ 2 fold & sig. in E2	E2 vs DMSO	1.50514790262803	0.0354639218404862	Intron (ENST00000447533.5/142891, intron 1 of 3)	9788	ENSG00000156671	SAMD8	sterile alpha motif domain containing 8
chr10	77254878	77255437	*	+ 2 fold & sig. in E2	E2 vs DMSO	1.32135556722121	0.0223867198027073	Intron (ENST00000604624.6/3778, intron 1 of 27)	54181	ENSG00000156113	KCNMA1	potassium calcium-activated channel subfamily M alpha 1
chr10	77832368	77832600	*	+ 2 fold & sig. in E2	E2 vs DMSO	1.29499565537491	0.0441283327126618	Intron (ENST00000475613.6/9231, intron 1 of 21)	-2926	ENSG00000151208	DLG5	discs large MAGUK scaffold protein 5
chr10	77870045	77870391	*	+ 2 fold & sig. in E2	E2 vs DMSO	2.0254066145693	1.65076014992581e-07	Promoter	-854	ENSG00000151208	DLG5	discs large MAGUK scaffold protein 5
chr10	77906924	77907225	*	+ 2 fold & sig. in E2	E2 vs DMSO	1.83633069295649	0.000100252246337797	Intron (ENST00000372391.7/9231, intron 1 of 31)	-17417	ENSG00000151208	DLG5	discs large MAGUK scaffold protein 5
chr10	77972229	77972552	*	+ 2 fold & sig. in E2	E2 vs DMSO	1.57990154654671	7.48837852701731e-05	Intron (ENST00000698724.1/11128, intron 9 of 10)	9282	ENSG00000148606	POLR3A	RNA polymerase III subunit A
chr10	78830389	78830593	*	+ 2 fold & sig. in E2	E2 vs DMSO	1.41895206139837	0.0412387440860137	Distal Intergenic	131801	ENSG00000224596	ZMIZ1-AS1	ZMIZ1 antisense RNA 1
chr10	79046844	79047317	*	+ 2 fold & sig. in E2	E2 vs DMSO	2.12479615097341	0.000435022307726634	Intron (ENST00000456353.5/283050, intron 5 of 9)	20103	ENSG00000224596	ZMIZ1-AS1	ZMIZ1 antisense RNA 1
chr10	79346140	79346344	*	+ 2 fold & sig. in E2	E2 vs DMSO	1.70968524904595	0.00091059894592027	Distal Intergenic	-1125	ENSG00000108179	PPIF	peptidylprolyl isomerase F
chr10	80013476	80013843	*	+ 2 fold & sig. in E2	E2 vs DMSO	1.38706368072672	0.00612342929767765	Distal Intergenic	-30862	ENSG00000133661	SFTPD	surfactant protein D
chr10	889249	889467	*	+ 2 fold & sig. in E2	E2 vs DMSO	1.88678102077456	0.0198963027482149	Promoter	367	ENSG00000107929	LARP4B	La ribonucleoprotein 4B
chr10	93571134	93571381	*	+ 2 fold & sig. in E2	E2 vs DMSO	1.27861862980723	0.0166602959119681	Intron (ENST00000371481.9/338557, intron 1 of 2)	4452	ENSG00000186188	FFAR4	free fatty acid receptor 4
chr10	98396090	98396413	*	+ 2 fold & sig. in E2	E2 vs DMSO	1.44210361718435	0.00269259051650438	Promoter	-783	ENSG00000284415	MIR1287	microRNA 1287
chr11	100999628	101000137	*	+ 2 fold & sig. in E2	E2 vs DMSO	2.41266042631361	1.30726314797904e-06	Distal Intergenic	39778	ENSG00000165895	ARHGAP42	Rho GTPase activating protein 42
chr11	108667328	108667589	*	+ 2 fold & sig. in E2	E2 vs DMSO	1.76911735834209	0.00145025566192334	Intron (ENST00000693015.1/1662, intron 1 of 14)	2206	ENSG00000178105	DDX10	DEAD-box helicase 10
chr11	112292931	112293358	*	+ 2 fold & sig. in E2	E2 vs DMSO	1.76902132118693	7.02659866019446e-05	Promoter	358	ENSG00000250303	LINC02762	long intergenic non-protein coding RNA 2762
chr11	115462323	115462606	*	+ 2 fold & sig. in E2	E2 vs DMSO	1.9192051533711	0.000721205537902834	Intron (ENST00000331581.11/23705, intron 1 of 11)	41783	ENSG00000182985	CADM1	cell adhesion molecule 1
chr11	116275762	116275945	*	+ 2 fold & sig. in E2	E2 vs DMSO	1.40825246893638	0.0398442498612418	Distal Intergenic	224705	NA	LINC02151	long intergenic non-protein coding RNA 2151
chr11	11972125	11972652	*	+ 2 fold & sig. in E2	E2 vs DMSO	1.7424433014214	0.000517672495555262	Intron (ENST00000396505.7/27122, intron 4 of 7)	-3379	ENSG00000050165	DKK3	dickkopf WNT signaling pathway inhibitor 3
chr11	119910069	119910249	*	+ 2 fold & sig. in E2	E2 vs DMSO	2.07900576374903	0.0276835461455276	Intron (ENST00000662653.1/105369526, intron 1 of 2)	4719	NA	LOC105369526	uncharacterized LOC105369526
chr11	120812845	120813217	*	+ 2 fold & sig. in E2	E2 vs DMSO	1.66292526858123	0.000132759358658118	Intron (ENST00000638419.1/2900, intron 4 of 20)	-45023	ENSG00000149403	GRIK4	glutamate ionotropic receptor kainate type subunit 4
chr11	121325992	121326530	*	+ 2 fold & sig. in E2	E2 vs DMSO	1.49279472089133	0.000399242681113364	Distal Intergenic	20242	ENSG00000109929	SC5D	sterol-C5-desaturase
chr11	12829255	12829474	*	+ 2 fold & sig. in E2	E2 vs DMSO	1.79068980675732	0.000296222334667883	Intron (ENST00000527636.7/7003, intron 3 of 12)	1134	ENSG00000187079	TEAD1	TEA domain transcription factor 1
chr11	129633381	129633694	*	+ 2 fold & sig. in E2	E2 vs DMSO	1.91388777640977	0.000764080754555367	Distal Intergenic	-16112	ENSG00000281097	LINC01395	long intergenic non-protein coding RNA 1395
chr11	129709985	129710511	*	+ 2 fold & sig. in E2	E2 vs DMSO	2.22521126416695	0.000174569045196754	Distal Intergenic	-92716	ENSG00000281097	LINC01395	long intergenic non-protein coding RNA 1395
chr11	131681957	131682290	*	+ 2 fold & sig. in E2	E2 vs DMSO	2.17450290863972	0.00036303913628645	Intron (ENST00000374791.7/50863, intron 1 of 7)	-18350	NA	NTM-AS1	NTM antisense RNA 1
chr11	131692118	131692550	*	+ 2 fold & sig. in E2	E2 vs DMSO	1.91337760926743	1.98850162632267e-05	Intron (ENST00000374791.7/50863, intron 1 of 7)	-28511	NA	NTM-AS1	NTM antisense RNA 1
chr11	14036642	14036849	*	+ 2 fold & sig. in E2	E2 vs DMSO	1.27988424189016	0.0355251905563679	Intron (ENST00000576479.4/10418, intron 2 of 15)	73919	ENSG00000262655	SPON1	spondin 1
chr11	1650326	1650748	*	+ 2 fold & sig. in E2	E2 vs DMSO	1.25734269485256	0.0152183552357007	Distal Intergenic	-14849	ENSG00000205866	FAM99A	family with sequence similarity 99 member A
chr11	17272940	17273173	*	+ 2 fold & sig. in E2	E2 vs DMSO	1.45607892450782	0.00112632108315609	Intron (ENST00000528644.5/4925, intron 1 of 2)	-2838	ENSG00000070081	NUCB2	nucleobindin 2
chr11	1731635	1732390	*	+ 2 fold & sig. in E2	E2 vs DMSO	2.12035178814171	2.17237364008356e-07	Distal Intergenic	16712	ENSG00000244242	IFITM10	interferon induced transmembrane protein 10
chr11	1733458	1733829	*	+ 2 fold & sig. in E2	E2 vs DMSO	1.75294534254607	7.91619937977586e-05	3' UTR	15273	ENSG00000244242	IFITM10	interferon induced transmembrane protein 10
chr11	1743607	1743958	*	+ 2 fold & sig. in E2	E2 vs DMSO	1.80078719513201	7.99068922095428e-05	Intron (ENST00000340134.5/402778, intron 2 of 2)	5144	ENSG00000244242	IFITM10	interferon induced transmembrane protein 10
chr11	1769305	1769621	*	+ 2 fold & sig. in E2	E2 vs DMSO	1.38436186212675	0.00273827776377754	Distal Intergenic	-4732	ENSG00000117984	CTSD	cathepsin D
chr11	1770616	1771047	*	+ 2 fold & sig. in E2	E2 vs DMSO	2.31313664021789	5.02899728092513e-08	Distal Intergenic	-6043	ENSG00000117984	CTSD	cathepsin D
chr11	1830955	1831141	*	+ 2 fold & sig. in E2	E2 vs DMSO	1.48175812766317	0.000563459743515074	Promoter	0	ENSG00000149043	SYT8	synaptotagmin 8
chr11	19469779	19470185	*	+ 2 fold & sig. in E2	E2 vs DMSO	2.04057454186221	8.19021652493346e-05	Intron (ENST00000360655.8/89797, intron 1 of 37)	35715	ENSG00000255043	NAV2-AS5	NAV2 antisense RNA 5
chr11	3010853	3011221	*	+ 2 fold & sig. in E2	E2 vs DMSO	1.95005493639548	0.00102799979008276	Intron (ENST00000531387.5/833, intron 18 of 22)	-1320	ENSG00000110619	CARS1	cysteinyl-tRNA synthetase 1
chr11	30527635	30527905	*	+ 2 fold & sig. in E2	E2 vs DMSO	1.55698184196869	0.0407170008534046	Intron (ENST00000448418.6/744, intron 3 of 6)	8160	ENSG00000066382	MPPED2	metallophosphoesterase domain containing 2
chr11	3345770	3346096	*	+ 2 fold & sig. in E2	E2 vs DMSO	1.19555484845072	0.0366250740025761	Intron (ENST00000528796.5/7748, intron 3 of 3)	16624	ENSG00000005801	ZNF195	zinc finger protein 195
chr11	35097896	35098221	*	+ 2 fold & sig. in E2	E2 vs DMSO	1.30636658724298	0.0245576403775094	Distal Intergenic	-30704	NA	LOC105376626	uncharacterized LOC105376626
chr11	35264250	35264595	*	+ 2 fold & sig. in E2	E2 vs DMSO	3.0328612382491	0.000585589783524373	Promoter	-107	ENSG00000110436	SLC1A2	solute carrier family 1 member 2
chr11	35797439	35797614	*	+ 2 fold & sig. in E2	E2 vs DMSO	2.23267157843483	0.00106576072367445	Intron (ENST00000299413.7/54765, intron 4 of 4)	73183	ENSG00000166326	TRIM44	tripartite motif containing 44
chr11	36016654	36016826	*	+ 2 fold & sig. in E2	E2 vs DMSO	1.15821799415371	0.0383293137733498	Intron (ENST00000524419.5/143458, intron 1 of 5)	6556	ENSG00000263389	MIR3973	microRNA 3973
chr11	44985781	44986167	*	+ 2 fold & sig. in E2	E2 vs DMSO	1.90225858241289	0.00435134075402	Distal Intergenic	11638	ENSG00000254654	LINC02685	long intergenic non-protein coding RNA 2685
chr11	46234036	46234377	*	+ 2 fold & sig. in E2	E2 vs DMSO	2.1706835176852	1.29161797390372e-06	Distal Intergenic	-13598	NA	LINC02710	long intergenic non-protein coding RNA 2710
chr11	4987972	4988228	*	+ 2 fold & sig. in E2	E2 vs DMSO	1.20216929507638	0.0292938006854793	Promoter	415	ENSG00000167346	MMP26	matrix metallopeptidase 26
chr11	63591368	63591607	*	+ 2 fold & sig. in E2	E2 vs DMSO	1.16647829881881	0.040199652114986	Intron (ENST00000323646.9/11145, intron 2 of 3)	7108	ENSG00000176485	PLAAT3	phospholipase A and acyltransferase 3
chr11	63872910	63873141	*	+ 2 fold & sig. in E2	E2 vs DMSO	1.15934502879923	0.000339329117769056	Intron (ENST00000377810.8/2011, intron 1 of 17)	3634	ENSG00000072518	MARK2	microtubule affinity regulating kinase 2
chr11	648042	648225	*	+ 2 fold & sig. in E2	E2 vs DMSO	3.13083940817502	0.00118389446011074	Intron (ENST00000527170.5/10522, intron 9 of 9)	-1446	ENSG00000177030	DEAF1	DEAF1 transcription factor
chr11	65379995	65380251	*	+ 2 fold & sig. in E2	E2 vs DMSO	1.79704605722668	3.00465388194089e-05	5' UTR	738	ENSG00000162241	SLC25A45	solute carrier family 25 member 45
chr11	69010420	69010736	*	+ 2 fold & sig. in E2	E2 vs DMSO	1.18662389751613	0.0238695185141583	Intron (ENST00000441623.1/116535, intron 1 of 2)	-1547	ENSG00000256508	MRGPRF-AS1	MRGPRF antisense RNA 1
chr11	69460683	69460873	*	+ 2 fold & sig. in E2	E2 vs DMSO	1.04025925435544	0.049387866965359	Distal Intergenic	19084	ENSG00000255774	LINC02747	long intergenic non-protein coding RNA 2747
chr11	69530301	69530702	*	+ 2 fold & sig. in E2	E2 vs DMSO	2.27430978763008	0.000212904999694793	Distal Intergenic	44690	NA	LINC01488	long intergenic non-protein coding RNA 1488
chr11	69541573	69542161	*	+ 2 fold & sig. in E2	E2 vs DMSO	2.44293416352757	1.98910487123422e-06	Distal Intergenic	55962	NA	LINC01488	long intergenic non-protein coding RNA 1488
chr11	70106082	70106693	*	+ 2 fold & sig. in E2	E2 vs DMSO	2.13883017451885	1.21122973538436e-06	Intron (ENST00000531349.6/55107, intron 6 of 27)	-1492	ENSG00000131620	ANO1	anoctamin 1
chr11	70745935	70746242	*	+ 2 fold & sig. in E2	E2 vs DMSO	1.52042122755593	0.0339359106664399	Intron (ENST00000601538.6/22941, intron 14 of 25)	-27932	ENSG00000162105	SHANK2	SH3 and multiple ankyrin repeat domains 2
chr11	70935226	70935747	*	+ 2 fold & sig. in E2	E2 vs DMSO	1.37439515907141	0.0241902820272322	Intron (ENST00000601538.6/22941, intron 10 of 25)	15324	ENSG00000162105	SHANK2	SH3 and multiple ankyrin repeat domains 2
chr11	71453966	71454194	*	+ 2 fold & sig. in E2	E2 vs DMSO	1.21472771279199	0.000208244512487417	Intron (ENST00000534634.5/55191, intron 1 of 2)	610	ENSG00000172890	NADSYN1	NAD synthetase 1
chr11	77038403	77039018	*	+ 2 fold & sig. in E2	E2 vs DMSO	2.27156193656403	1.37928736536585e-07	Intron (ENST00000528622.5/192134, intron 2 of 2)	4005	ENSG00000198488	B3GNT6	UDP-GlcNAc:betaGal beta-1,3-N-acetylglucosaminyltransferase 6
chr11	83175910	83176234	*	+ 2 fold & sig. in E2	E2 vs DMSO	1.21806057468107	0.0151639434511109	Intron (ENST00000298281.8/51585, intron 9 of 15)	-4188	ENSG00000165494	PCF11	PCF11 cleavage and polyadenylation factor subunit
chr11	84788248	84788495	*	+ 2 fold & sig. in E2	E2 vs DMSO	1.14592157356775	0.0407517006988267	Intron (ENST00000534275.1/124902727, intron 3 of 3)	-67333	ENSG00000150672	DLG2	discs large MAGUK scaffold protein 2
chr11	84824666	84824911	*	+ 2 fold & sig. in E2	E2 vs DMSO	1.33134406921568	0.0379852526005266	Intron (ENST00000398309.6/1740, intron 1 of 22)	98226	ENSG00000150672	DLG2	discs large MAGUK scaffold protein 2
chr11	86671375	86671590	*	+ 2 fold & sig. in E2	E2 vs DMSO	1.56137168433484	0.00669841251566365	Promoter	232	ENSG00000151376	ME3	malic enzyme 3
chr11	8909875	8910081	*	+ 2 fold & sig. in E2	E2 vs DMSO	1.08366493900598	0.0426102062345749	Promoter	0	ENSG00000166444	DENND2B	DENN domain containing 2B
chr11	94196343	94196821	*	+ 2 fold & sig. in E2	E2 vs DMSO	2.21719241184213	1.90416627896987e-05	Intron (ENST00000655054.1/105369435, intron 2 of 2)	-3052	NA	LOC105369435	uncharacterized LOC105369435
chr11	94830769	94831260	*	+ 2 fold & sig. in E2	E2 vs DMSO	1.07248372525314	0.00136192334389922	Intron (ENST00000317829.12/154810, intron 4 of 11)	10469	ENSG00000166025	AMOTL1	angiomotin like 1
chr11	95091759	95092222	*	+ 2 fold & sig. in E2	E2 vs DMSO	1.36791889352776	0.000345784831673904	Intron (ENST00000278505.5/23052, intron 1 of 1)	1913	ENSG00000149218	ENDOD1	endonuclease domain containing 1
chr12	101698431	101698683	*	+ 2 fold & sig. in E2	E2 vs DMSO	1.78642972497982	0.0352225121710524	Promoter	466	ENSG00000111666	CHPT1	choline phosphotransferase 1
chr12	102548634	102548866	*	+ 2 fold & sig. in E2	E2 vs DMSO	2.02482447307493	0.00316844415530204	Distal Intergenic	-66890	ENSG00000017427	IGF1	insulin like growth factor 1
chr12	102949114	102949361	*	+ 2 fold & sig. in E2	E2 vs DMSO	1.11974160006197	0.00638247417267854	Intron (ENST00000551337.5/5053, intron 1 of 4)	1484	NA	LOC112267865	uncharacterized LOC112267865
chr12	103175665	103176047	*	+ 2 fold & sig. in E2	E2 vs DMSO	1.38607349506241	0.0108719355153955	Intron (ENST00000652849.1/101929058, intron 5 of 5)	2375	ENSG00000179088	C12orf42	chromosome 12 open reading frame 42
chr12	112103866	112104278	*	+ 2 fold & sig. in E2	E2 vs DMSO	1.28185033023909	0.000452353654506095	Intron (ENST00000261745.9/80018, intron 1 of 23)	4465	ENSG00000111300	NAA25	N-alpha-acetyltransferase 25, NatB auxiliary subunit
chr12	115813311	115813606	*	+ 2 fold & sig. in E2	E2 vs DMSO	1.27254641290502	0.00794319724615208	Intron (ENST00000546414.1/105370004, intron 2 of 2)	39112	NA	NA	NA
chr12	115870178	115870540	*	+ 2 fold & sig. in E2	E2 vs DMSO	2.37678884970795	1.73356576443193e-07	Intron (ENST00000546414.1/105370004, intron 1 of 2)	15597	NA	LINC02463	long intergenic non-protein coding RNA 2463
chr12	116494243	116494622	*	+ 2 fold & sig. in E2	E2 vs DMSO	2.17715085024217	1.6122885239543e-08	Intron (ENST00000659057.1/107984439, intron 1 of 2)	12170	NA	LINC02457	long intergenic non-protein coding RNA 2457
chr12	116551974	116552197	*	+ 2 fold & sig. in E2	E2 vs DMSO	1.61635656268209	0.00828216797243481	Intron (ENST00000547114.3/ENST00000547114.3, intron 3 of 3)	1232	ENSG00000258102	MAP1LC3B2	microtubule associated protein 1 light chain 3 beta 2
chr12	121762431	121762635	*	+ 2 fold & sig. in E2	E2 vs DMSO	1.25083535478456	0.031293998779058	Intron (ENST00000342607.10/144404, intron 6 of 12)	10302	ENSG00000188735	TMEM120B	transmembrane protein 120B
chr12	123069642	123070393	*	+ 2 fold & sig. in E2	E2 vs DMSO	2.40581644686759	3.55265033550285e-07	Intron (ENST00000280562.9/57605, intron 1 of 24)	5702	ENSG00000090975	PITPNM2	phosphatidylinositol transfer protein membrane associated 2
chr12	124322206	124322397	*	+ 2 fold & sig. in E2	E2 vs DMSO	1.13615574653673	0.0298482469722948	Distal Intergenic	5188	ENSG00000196498	NCOR2	nuclear receptor corepressor 2
chr12	12499277	12499465	*	+ 2 fold & sig. in E2	E2 vs DMSO	1.61362912606341	0.00744987986968898	Intron (ENST00000298573.9/80824, intron 4 of 6)	6722	ENSG00000111266	DUSP16	dual specificity phosphatase 16
chr12	130878205	130878634	*	+ 2 fold & sig. in E2	E2 vs DMSO	1.02513891140647	0.0186645323236425	Distal Intergenic	5102	ENSG00000132341	RAN	RAN, member RAS oncogene family
chr12	130953846	130954295	*	+ 2 fold & sig. in E2	E2 vs DMSO	1.21652111003545	0.00111003324547311	Promoter	0	ENSG00000111452	ADGRD1	adhesion G protein-coupled receptor D1
chr12	14837001	14837159	*	+ 2 fold & sig. in E2	E2 vs DMSO	1.39590986600479	0.0467146435697609	Intron (ENST00000533472.1/144608, intron 1 of 1)	5903	ENSG00000111339	ART4	ADP-ribosyltransferase 4 (inactive) (Dombrock blood group)
chr12	15222182	15222538	*	+ 2 fold & sig. in E2	E2 vs DMSO	1.71516293989107	0.000115259103060042	Promoter	-765	ENSG00000134533	RERG	RAS like estrogen regulated growth inhibitor
chr12	1932323	1932637	*	+ 2 fold & sig. in E2	E2 vs DMSO	1.85464948722109	0.000310150777737097	Intron (ENST00000418006.1/100271702, intron 1 of 1)	3937	ENSG00000235049	LINC00940	long intergenic non-protein coding RNA 940
chr12	32543204	32543354	*	+ 2 fold & sig. in E2	E2 vs DMSO	1.53003393715905	0.0417533180127563	Intron (ENST00000534526.7/121512, intron 1 of 16)	8880	ENSG00000139132	FGD4	FYVE, RhoGEF and PH domain containing 4
chr12	42576378	42576720	*	+ 2 fold & sig. in E2	E2 vs DMSO	1.34759400707017	0.014158786320253	Intron (ENST00000345127.9/144165, intron 1 of 7)	12563	ENSG00000139174	PRICKLE1	prickle planar cell polarity protein 1
chr12	50862409	50862653	*	+ 2 fold & sig. in E2	E2 vs DMSO	1.25904569702594	0.037993894334836	Intron (ENST00000551456.5/283471, intron 3 of 3)	19483	ENSG00000186452	TMPRSS12	transmembrane serine protease 12
chr12	52200536	52201111	*	+ 2 fold & sig. in E2	E2 vs DMSO	1.59409812011083	1.05261403219201e-06	Intron (ENST00000640420.1/283404, intron 2 of 2)	7291	NA	LINC02874	long intergenic non-protein coding RNA 2874
chr12	5258415	5258574	*	+ 2 fold & sig. in E2	E2 vs DMSO	2.50378164433726	0.000500484007097221	Distal Intergenic	-14216	ENSG00000256115	LINC02443	long intergenic non-protein coding RNA 2443
chr12	52617308	52617747	*	+ 2 fold & sig. in E2	E2 vs DMSO	2.23955054487814	1.4613075924873e-05	Intron (ENST00000305748.7/319101, intron 1 of 8)	802	ENSG00000186049	KRT73	keratin 73
chr12	53358845	53359179	*	+ 2 fold & sig. in E2	E2 vs DMSO	1.46320082011954	0.00429746588207547	Distal Intergenic	-13530	ENSG00000170374	SP7	Sp7 transcription factor
chr12	56927685	56927936	*	+ 2 fold & sig. in E2	E2 vs DMSO	1.53103748176394	0.00179395079139816	Intron (ENST00000293502.2/121214, intron 3 of 3)	6472	ENSG00000170426	SDR9C7	short chain dehydrogenase/reductase family 9C member 7
chr12	57089869	57090111	*	+ 2 fold & sig. in E2	E2 vs DMSO	1.11565880499012	7.1064602143249e-05	Intron (ENST00000555857.1/4665, intron 1 of 1)	722	ENSG00000166886	NAB2	NGFI-A binding protein 2
chr12	64600922	64601235	*	+ 2 fold & sig. in E2	E2 vs DMSO	1.28097759991718	0.00617529497687877	Intron (ENST00000637125.1/283349, intron 2 of 5)	8224	NA	RASSF3-DT	RASSF3 divergent transcript
chr12	67828105	67828401	*	+ 2 fold & sig. in E2	E2 vs DMSO	1.42707809519144	0.0326091654359583	Distal Intergenic	-98630	ENSG00000255970	LINC02421	long intergenic non-protein coding RNA 2421
chr12	81209792	81210201	*	+ 2 fold & sig. in E2	E2 vs DMSO	1.82860720386205	0.00318366489304978	Intron (ENST00000261206.7/79611, intron 9 of 15)	34960	ENSG00000111058	ACSS3	acyl-CoA synthetase short chain family member 3
chr12	91613453	91613897	*	+ 2 fold & sig. in E2	E2 vs DMSO	2.11244699493134	1.42799464333901e-06	Intron (ENST00000685093.1/105369896, intron 1 of 9)	20330	NA	LOC105369896	uncharacterized LOC105369896
chr12	91883845	91884179	*	+ 2 fold & sig. in E2	E2 vs DMSO	2.13498213048329	2.46061859505366e-05	Distal Intergenic	6454	ENSG00000257893	LINC02404	long intergenic non-protein coding RNA 2404
chr12	94676134	94676352	*	+ 2 fold & sig. in E2	E2 vs DMSO	1.18324066003786	0.0366699288680831	Distal Intergenic	-25577	ENSG00000057704	TMCC3	transmembrane and coiled-coil domain family 3
chr12	95172550	95172852	*	+ 2 fold & sig. in E2	E2 vs DMSO	2.22937696303135	0.000308764455601465	Exon (ENST00000343958.9/55785, exon 3 of 21)	36104	ENSG00000180263	FGD6	FYVE, RhoGEF and PH domain containing 6
chr13	105442188	105442459	*	+ 2 fold & sig. in E2	E2 vs DMSO	1.17601856435163	0.00778333115168386	Distal Intergenic	-23408	ENSG00000182346	DAOA	D-amino acid oxidase activator
chr13	105906929	105907234	*	+ 2 fold & sig. in E2	E2 vs DMSO	1.60682594940891	0.00021624996555752	Distal Intergenic	156602	NA	NA	NA
chr13	108711415	108711608	*	+ 2 fold & sig. in E2	E2 vs DMSO	2.15105758313053	0.000497906883895044	Intron (ENST00000356711.7/23026, intron 2 of 34)	-67934	ENSG00000041515	MYO16	myosin XVI
chr13	109026796	109027135	*	+ 2 fold & sig. in E2	E2 vs DMSO	1.7784289394057	0.00156523884249099	Intron (ENST00000356711.7/23026, intron 23 of 34)	74784	NA	MYO16-AS2	MYO16 antisense RNA 2
chr13	111914281	111914526	*	+ 2 fold & sig. in E2	E2 vs DMSO	2.35803349615189	0.00139818617938323	Distal Intergenic	14293	ENSG00000226903	LINC00354	long intergenic non-protein coding RNA 354
chr13	112761836	112762094	*	+ 2 fold & sig. in E2	E2 vs DMSO	1.66137189472883	0.00408036260014806	Intron (ENST00000375645.8/23250, intron 1 of 29)	-7143	ENSG00000232684	ATP11A-AS1	ATP11A antisense RNA 1
chr13	113928702	113929051	*	+ 2 fold & sig. in E2	E2 vs DMSO	2.09378532914316	6.64770068081237e-05	Promoter	0	NA	LINC00565	long intergenic non-protein coding RNA 565
chr13	24149647	24149955	*	+ 2 fold & sig. in E2	E2 vs DMSO	2.80347865893999	3.67936648601255e-08	Intron (ENST00000382141.4/221178, intron 3 of 15)	-10765	ENSG00000182957	SPATA13	spermatogenesis associated 13
chr13	28442975	28443252	*	+ 2 fold & sig. in E2	E2 vs DMSO	1.40244120610773	0.00229508714891784	Intron (ENST00000282397.9/2321, intron 3 of 29)	51591	ENSG00000102755	FLT1	fms related receptor tyrosine kinase 1
chr13	30742937	30743216	*	+ 2 fold & sig. in E2	E2 vs DMSO	1.71622874402002	0.00618367847279439	Intron (ENST00000617770.4/241, intron 2 of 5)	601	ENSG00000132965	ALOX5AP	arachidonate 5-lipoxygenase activating protein
chr13	32959549	32959818	*	+ 2 fold & sig. in E2	E2 vs DMSO	1.17344835870735	0.0241662473113923	Distal Intergenic	-47899	NA	LINC00423	long intergenic non-protein coding RNA 423
chr13	33509609	33510020	*	+ 2 fold & sig. in E2	E2 vs DMSO	1.26398664169019	0.0422145093848337	Intron (ENST00000686875.1/90627, intron 2 of 3)	14302	ENSG00000133121	STARD13	StAR related lipid transfer domain containing 13
chr13	33643345	33643571	*	+ 2 fold & sig. in E2	E2 vs DMSO	1.10308492640103	0.00603287099707322	Intron (ENST00000686875.1/90627, intron 1 of 3)	33153	ENSG00000133121	STARD13	StAR related lipid transfer domain containing 13
chr13	36028428	36028700	*	+ 2 fold & sig. in E2	E2 vs DMSO	1.59048244233621	0.000583819617638974	Intron (ENST00000360631.8/9201, intron 3 of 16)	102606	ENSG00000133083	DCLK1	doublecortin like kinase 1
chr13	43348496	43348742	*	+ 2 fold & sig. in E2	E2 vs DMSO	1.38627703233591	0.0109317578794568	Intron (ENST00000690772.1/55068, intron 8 of 16)	12623	ENSG00000120658	ENOX1	ecto-NOX disulfide-thiol exchanger 1
chr13	43720816	43720989	*	+ 2 fold & sig. in E2	E2 vs DMSO	1.25594368296275	0.049271664204333	Intron (ENST00000690772.1/55068, intron 1 of 16)	65919	ENSG00000120658	ENOX1	ecto-NOX disulfide-thiol exchanger 1
chr13	53556535	53556885	*	+ 2 fold & sig. in E2	E2 vs DMSO	1.88000137781015	0.00121878691658361	Intron (ENST00000657016.1/ENST00000657016.1, intron 2 of 3)	-258534	ENSG00000261517	LINC00558	long intergenic non-protein coding RNA 558
chr13	64176877	64177066	*	+ 2 fold & sig. in E2	E2 vs DMSO	1.84262930920577	0.00371292091824969	Distal Intergenic	-100833	ENSG00000227674	LINC00355	long intergenic non-protein coding RNA 355
chr13	65214371	65214942	*	+ 2 fold & sig. in E2	E2 vs DMSO	1.69348638920654	0.000207283665660621	Distal Intergenic	-651128	NA	LINC01052	long intergenic non-protein coding RNA 1052
chr13	98297837	98298200	*	+ 2 fold & sig. in E2	E2 vs DMSO	3.0877613169265	1.83605262554167e-07	Intron (ENST00000595437.5/10160, intron 2 of 27)	-29991	NA	LOC105370327	uncharacterized LOC105370327
chr13	98544080	98544453	*	+ 2 fold & sig. in E2	E2 vs DMSO	1.63172512034362	0.00395647930070488	Intron (ENST00000539966.6/8428, intron 1 of 10)	-22082	ENSG00000102572	STK24	serine/threonine kinase 24
chr14	100137208	100137567	*	+ 2 fold & sig. in E2	E2 vs DMSO	2.02210465565949	4.10457168882007e-06	Promoter	102	ENSG00000196405	EVL	Enah/Vasp-like
chr14	101573509	101573721	*	+ 2 fold & sig. in E2	E2 vs DMSO	1.42964719363963	0.0207092346666052	Intron (ENST00000700197.1/64150, intron 2 of 8)	-8388	ENSG00000258498	DIO3OS	DIO3 opposite strand upstream RNA
chr14	103832095	103832420	*	+ 2 fold & sig. in E2	E2 vs DMSO	1.43063501837312	0.00473849266186113	Intron (ENST00000202556.14/23368, intron 1 of 16)	7687	ENSG00000088808	PPP1R13B	protein phosphatase 1 regulatory subunit 13B
chr14	103925930	103926130	*	+ 2 fold & sig. in E2	E2 vs DMSO	1.94750981780431	0.00395647930070488	Intron (ENST00000554880.5/9556, intron 1 of 3)	2139	ENSG00000156411	ATP5MJ	ATP synthase membrane subunit j
chr14	105589334	105589959	*	+ 2 fold & sig. in E2	E2 vs DMSO	1.24375860136285	0.040474012371249	Distal Intergenic	-31157	ENSG00000274172	MIR8071-1	microRNA 8071-1
chr14	105643288	105643676	*	+ 2 fold & sig. in E2	E2 vs DMSO	2.35022370051024	0.00186880984994434	Exon (ENST00000641095.1/ENST00000641095.1, exon 3 of 6)	3120	ENSG00000277030	MIR8071-2	microRNA 8071-2
chr14	105668344	105668822	*	+ 2 fold & sig. in E2	E2 vs DMSO	2.74536928351087	2.59153538856871e-05	Exon (ENST00000390555.3/ENST00000390555.3, exon 3 of 6)	28176	ENSG00000277030	MIR8071-2	microRNA 8071-2
chr14	105741624	105742104	*	+ 2 fold & sig. in E2	E2 vs DMSO	1.96189952508869	0.0157818031346329	Exon (ENST00000390548.6/ENST00000390548.6, exon 3 of 6)	101456	ENSG00000277030	MIR8071-2	microRNA 8071-2
chr14	105769339	105769621	*	+ 2 fold & sig. in E2	E2 vs DMSO	2.50940348887738	0.000195652749286889	Exon (ENST00000641136.1/ENST00000641136.1, exon 7 of 9)	87951	ENSG00000265612	MIR4539	microRNA 4539
chr14	22273353	22273855	*	+ 2 fold & sig. in E2	E2 vs DMSO	1.70605682347114	0.00154756136574863	Intron (ENST00000656379.1/105370401, intron 3 of 3)	109314	ENSG00000251002	LOC105370401	uncharacterized LOC105370401
chr14	22689239	22689536	*	+ 2 fold & sig. in E2	E2 vs DMSO	1.27915796666657	0.00919087318974054	Distal Intergenic	-44887	ENSG00000255804	OR6J1	olfactory receptor family 6 subfamily J member 1
chr14	23664687	23664909	*	+ 2 fold & sig. in E2	E2 vs DMSO	1.92918854828982	0.000722317295955905	Distal Intergenic	25348	ENSG00000100867	DHRS2	dehydrogenase/reductase 2
chr14	23895916	23896262	*	+ 2 fold & sig. in E2	E2 vs DMSO	2.25839960724063	0.000301655312755254	Distal Intergenic	38306	NA	LINC00596	long intergenic non-protein coding RNA 596
chr14	25724423	25724652	*	+ 2 fold & sig. in E2	E2 vs DMSO	1.7854723932001	0.0080970477540407	Intron (ENST00000546412.2/107984700, intron 5 of 9)	82060	NA	NA	NA
chr14	26319230	26319396	*	+ 2 fold & sig. in E2	E2 vs DMSO	1.33930616694832	0.0469216173305772	Distal Intergenic	-175925	NA	LINC02306	long intergenic non-protein coding RNA 2306
chr14	40816484	40816788	*	+ 2 fold & sig. in E2	E2 vs DMSO	1.27105657906829	0.00449469077602088	Intron (ENST00000651539.1/105370467, intron 6 of 10)	8325	NA	LOC105370467	uncharacterized LOC105370467
chr14	42215002	42215258	*	+ 2 fold & sig. in E2	E2 vs DMSO	1.60717136442779	0.00934628482632596	Distal Intergenic	515575	ENSG00000165379	LRFN5	leucine rich repeat and fibronectin type III domain containing 5
chr14	45616840	45617061	*	+ 2 fold & sig. in E2	E2 vs DMSO	1.92046056062951	0.0351859848430817	Distal Intergenic	48845	NA	LOC105370476	uncharacterized LOC105370476
chr14	53231233	53231622	*	+ 2 fold & sig. in E2	E2 vs DMSO	2.29015421437173	3.94160278835418e-06	Intron (ENST00000654605.1/105370502, intron 3 of 3)	13278	NA	LOC105370504	uncharacterized LOC105370504
chr14	53329533	53330066	*	+ 2 fold & sig. in E2	E2 vs DMSO	1.23760898937548	0.000502347254636415	Intron (ENST00000666968.1/105370502, intron 3 of 4)	12665	NA	LOC105370504	uncharacterized LOC105370504
chr14	55740908	55741150	*	+ 2 fold & sig. in E2	E2 vs DMSO	1.65352701350659	0.012136150588321	Distal Intergenic	-25027	ENSG00000177350	RPL13AP3	ribosomal protein L13a pseudogene 3
chr14	61646684	61646941	*	+ 2 fold & sig. in E2	E2 vs DMSO	1.74199979577151	0.00156081186702089	Promoter	-479	ENSG00000232774	FLJ22447	uncharacterized LOC400221
chr14	66537063	66537328	*	+ 2 fold & sig. in E2	E2 vs DMSO	1.59507622284026	0.0237384302586783	Intron (ENST00000315266.9/10243, intron 1 of 21)	28004	ENSG00000171723	GPHN	gephyrin
chr14	67497725	67498118	*	+ 2 fold & sig. in E2	E2 vs DMSO	1.36060020693628	0.00286105130858287	Intron (ENST00000555638.5/161145, intron 1 of 8)	-9004	ENSG00000198133	TMEM229B	transmembrane protein 229B
chr14	68945922	68946209	*	+ 2 fold & sig. in E2	E2 vs DMSO	1.88639983892648	5.46255310975673e-05	Intron (ENST00000394419.9/87, intron 1 of 21)	1339	ENSG00000072110	ACTN1	actinin alpha 1
chr14	70636166	70636503	*	+ 2 fold & sig. in E2	E2 vs DMSO	1.01228979863404	0.0370351731585245	Intron (ENST00000553982.1/10001, intron 1 of 4)	4701	ENSG00000133997	MED6	mediator complex subunit 6
chr14	71475994	71476242	*	+ 2 fold & sig. in E2	E2 vs DMSO	1.06102239583478	0.00449332106276221	Intron (ENST00000553453.5/26037, intron 3 of 5)	8809	ENSG00000197555	SIPA1L1	signal induced proliferation associated 1 like 1
chr14	71883474	71883708	*	+ 2 fold & sig. in E2	E2 vs DMSO	1.46763820080389	0.00751049865665846	Intron (ENST00000555581.1/9628, intron 1 of 1)	16077	ENSG00000182732	RGS6	regulator of G protein signaling 6
chr14	74922228	74922691	*	+ 2 fold & sig. in E2	E2 vs DMSO	2.09291714220952	0.000164938145948499	Promoter	0	ENSG00000198208	RPS6KL1	ribosomal protein S6 kinase like 1
chr14	76774624	76774987	*	+ 2 fold & sig. in E2	E2 vs DMSO	2.1873805587971	1.33539526150874e-07	Exon (ENST00000556368.1/ENST00000556368.1, exon 2 of 2)	-3019	ENSG00000071246	VASH1	vasohibin 1
chr14	77144856	77145153	*	+ 2 fold & sig. in E2	E2 vs DMSO	1.59050165478306	0.00281066338353939	Intron (ENST00000557752.1/57156, intron 2 of 5)	-2122	ENSG00000177108	ZDHHC22	zinc finger DHHC-type palmitoyltransferase 22
chr14	77738698	77738857	*	+ 2 fold & sig. in E2	E2 vs DMSO	1.55840035260422	0.0240095525608454	5' UTR	-1691	ENSG00000100603	SNW1	SNW domain containing 1
chr14	77989052	77989284	*	+ 2 fold & sig. in E2	E2 vs DMSO	1.49858705100575	0.0269968716281749	Distal Intergenic	65820	ENSG00000063761	ADCK1	aarF domain containing kinase 1
chr14	81287474	81287647	*	+ 2 fold & sig. in E2	E2 vs DMSO	2.34764215938457	0.0317073578978393	Intron (ENST00000614646.5/85439, intron 5 of 7)	-8656	ENSG00000140022	STON2	stonin 2
chr14	88166669	88166973	*	+ 2 fold & sig. in E2	E2 vs DMSO	1.27659858735646	0.00628292875730096	Distal Intergenic	-8418	NA	LOC105370612	uncharacterized LOC105370612
chr14	90512314	90512969	*	+ 2 fold & sig. in E2	E2 vs DMSO	1.38948321616749	5.19807442758401e-06	Distal Intergenic	55039	ENSG00000233208	LINC00642	long intergenic non-protein coding RNA 642
chr14	91392979	91393305	*	+ 2 fold & sig. in E2	E2 vs DMSO	1.79866534328926	0.0041151753362121	Intron (ENST00000389857.11/440193, intron 3 of 29)	15453	ENSG00000015133	CCDC88C	coiled-coil domain containing 88C
chr14	93007386	93007588	*	+ 2 fold & sig. in E2	E2 vs DMSO	1.45508122730737	0.000900987980933701	Intron (ENST00000354313.7/3705, intron 4 of 10)	-8447	ENSG00000100605	ITPK1	inositol-tetrakisphosphate 1-kinase
chr14	93045162	93045630	*	+ 2 fold & sig. in E2	E2 vs DMSO	2.05898415347154	3.42556388226872e-08	Intron (ENST00000354313.7/3705, intron 3 of 10)	-8188	ENSG00000100605	ITPK1	inositol-tetrakisphosphate 1-kinase
chr14	93056986	93057252	*	+ 2 fold & sig. in E2	E2 vs DMSO	1.46545727002643	0.00471619558061338	Intron (ENST00000354313.7/3705, intron 3 of 10)	9106	ENSG00000100605	ITPK1	inositol-tetrakisphosphate 1-kinase
chr14	94331083	94331257	*	+ 2 fold & sig. in E2	E2 vs DMSO	1.31730528670685	0.0312358117534278	Distal Intergenic	-7694	ENSG00000170099	SERPINA6	serpin family A member 6
chr14	94918970	94919279	*	+ 2 fold & sig. in E2	E2 vs DMSO	1.69443188676817	0.000292285803933145	Distal Intergenic	43697	NA	LINC02279	long intergenic non-protein coding RNA 2279
chr14	95067721	95067945	*	+ 2 fold & sig. in E2	E2 vs DMSO	1.34238018867219	0.0176102086700967	Distal Intergenic	23377	ENSG00000100697	DICER1	dicer 1, ribonuclease III
chr14	95161572	95161885	*	+ 2 fold & sig. in E2	E2 vs DMSO	1.34573329260637	0.00842151993696553	Intron (ENST00000554631.2/400242, intron 1 of 2)	2753	ENSG00000235706	DICER1-AS1	DICER1 antisense RNA 1
chr14	95511730	95512023	*	+ 2 fold & sig. in E2	E2 vs DMSO	1.39461642654925	0.0010164556481842	Intron (ENST00000682763.1/161176, intron 1 of 17)	-4113	NA	LOC101929107	uncharacterized LOC101929107
chr14	98909381	98909683	*	+ 2 fold & sig. in E2	E2 vs DMSO	1.05802476478876	0.0060742534909325	Distal Intergenic	197719	ENSG00000176605	LINC02914	long intergenic non-protein coding RNA 2914
chr15	100395073	100395362	*	+ 2 fold & sig. in E2	E2 vs DMSO	1.50724374574101	0.0291258847873347	Intron (ENST00000560718.1/102723320, intron 1 of 2)	-4513	NA	CERS3-AS1	CERS3 antisense RNA 1
chr15	100897580	100897910	*	+ 2 fold & sig. in E2	E2 vs DMSO	1.31192024991567	0.0281575607904761	Promoter	-150	ENSG00000184254	ALDH1A3	aldehyde dehydrogenase 1 family member A3
chr15	33117714	33117911	*	+ 2 fold & sig. in E2	E2 vs DMSO	1.1873216315142	0.0192574784420725	Intron (ENST00000616417.5/342184, intron 4 of 20)	1470	ENSG00000248905	FMN1	formin 1
chr15	39534467	39534686	*	+ 2 fold & sig. in E2	E2 vs DMSO	1.79013500730141	0.00284980070497446	Distal Intergenic	-14513	NA	LOC105370784	uncharacterized LOC105370784
chr15	40744251	40744432	*	+ 2 fold & sig. in E2	E2 vs DMSO	1.3296910718225	0.00616656954086826	Promoter	0	ENSG00000137824	RMDN3	regulator of microtubule dynamics 3
chr15	40966233	40966468	*	+ 2 fold & sig. in E2	E2 vs DMSO	1.40487933943323	0.0407849290025744	Distal Intergenic	12027	ENSG00000128965	CHAC1	ChaC glutathione specific gamma-glutamylcyclotransferase 1
chr15	42085377	42085636	*	+ 2 fold & sig. in E2	E2 vs DMSO	2.08870299746507	0.00108397410855352	Exon (ENST00000290472.4/283748, exon 5 of 20)	-1339	ENSG00000159337	PLA2G4D	phospholipase A2 group IVD
chr15	42413752	42413950	*	+ 2 fold & sig. in E2	E2 vs DMSO	2.64413375566564	7.51695221771581e-05	3' UTR	3137	ENSG00000092529	CAPN3	calpain 3
chr15	58476842	58477089	*	+ 2 fold & sig. in E2	E2 vs DMSO	2.08105590513019	0.00148436301650542	Intron (ENST00000356113.10/3990, intron 3 of 10)	-2929	ENSG00000128918	ALDH1A2	aldehyde dehydrogenase 1 family member A2
chr15	59555724	59556047	*	+ 2 fold & sig. in E2	E2 vs DMSO	1.25340788855308	0.0152183552357007	Distal Intergenic	-38828	ENSG00000140297	GCNT3	glucosaminyl (N-acetyl) transferase 3, mucin type
chr15	61768052	61768434	*	+ 2 fold & sig. in E2	E2 vs DMSO	1.86895079621657	0.000176735217067149	Distal Intergenic	38202	ENSG00000259284	LINC02349	long intergenic non-protein coding RNA 2349
chr15	62967041	62967553	*	+ 2 fold & sig. in E2	E2 vs DMSO	1.68992999980845	0.00179691531981851	Distal Intergenic	-75079	ENSG00000140416	TPM1	tropomyosin 1
chr15	62978076	62978544	*	+ 2 fold & sig. in E2	E2 vs DMSO	1.80400846634132	0.00423992567256447	Distal Intergenic	-64088	ENSG00000140416	TPM1	tropomyosin 1
chr15	63380596	63380766	*	+ 2 fold & sig. in E2	E2 vs DMSO	1.20709221447928	0.00245659615576183	Intron (ENST00000178638.8/771, intron 1 of 10)	1069	ENSG00000074410	CA12	carbonic anhydrase 12
chr15	63793738	63794237	*	+ 2 fold & sig. in E2	E2 vs DMSO	1.3313790408456	0.00648048040670745	Intron (ENST00000443617.7/8925, intron 1 of 77)	39648	ENSG00000103657	HERC1	HECT and RLD domain containing E3 ubiquitin protein ligase family member 1
chr15	67573612	67574029	*	+ 2 fold & sig. in E2	E2 vs DMSO	1.34786701943349	0.041812447307348	Intron (ENST00000178640.10/5607, intron 3 of 21)	10312	ENSG00000137764	MAP2K5	mitogen-activated protein kinase kinase 5
chr15	70016194	70016481	*	+ 2 fold & sig. in E2	E2 vs DMSO	2.16136724943368	3.43679577429108e-06	Distal Intergenic	35024	ENSG00000140332	TLE3	TLE family member 3, transcriptional corepressor
chr15	70281615	70282132	*	+ 2 fold & sig. in E2	E2 vs DMSO	1.39772507521977	0.00235102124395795	Distal Intergenic	-183439	ENSG00000140332	TLE3	TLE family member 3, transcriptional corepressor
chr15	71055572	71055724	*	+ 2 fold & sig. in E2	E2 vs DMSO	1.48854790806424	0.0372606642011971	Distal Intergenic	6795	ENSG00000137821	LRRC49	leucine rich repeat containing 49
chr15	73600035	73600213	*	+ 2 fold & sig. in E2	E2 vs DMSO	1.22326195218989	0.0363811038017577	Intron (ENST00000345330.9/27020, intron 1 of 8)	-30741	ENSG00000281183	NPTN-IT1	NPTN intronic transcript 1
chr15	73710118	73710505	*	+ 2 fold & sig. in E2	E2 vs DMSO	2.97195321988496	1.39838443064213e-07	Intron (ENST00000537340.6/80381, intron 7 of 8)	553	ENSG00000103855	CD276	CD276 molecule
chr15	73940542	73940844	*	+ 2 fold & sig. in E2	E2 vs DMSO	1.33666819084973	0.0363999724940714	Intron (ENST00000566011.5/4016, intron 1 of 7)	-5524	ENSG00000129038	LOXL1	lysyl oxidase like 1
chr15	74569400	74569732	*	+ 2 fold & sig. in E2	E2 vs DMSO	1.68142056961516	0.0235424818492042	Intron (ENST00000622429.1/10620, intron 2 of 8)	-21455	ENSG00000179361	ARID3B	AT-rich interaction domain 3B
chr15	76108070	76108367	*	+ 2 fold & sig. in E2	E2 vs DMSO	1.8437820107343	0.00803529501512726	Intron (ENST00000484722.5/123591, intron 1 of 10)	48085	ENSG00000169758	TMEM266	transmembrane protein 266
chr15	77596767	77597155	*	+ 2 fold & sig. in E2	E2 vs DMSO	2.17578649437218	7.20600051861559e-05	Intron (ENST00000561123.2/105370906, intron 3 of 3)	27797	ENSG00000259420	LOC105370906	uncharacterized LOC105370906
chr15	78813664	78813941	*	+ 2 fold & sig. in E2	E2 vs DMSO	1.84694988338841	0.0391820503755062	Intron (ENST00000379535.8/10933, intron 1 of 12)	-2200	ENSG00000136378	ADAMTS7	ADAM metallopeptidase with thrombospondin type 1 motif 7
chr15	79640251	79640502	*	+ 2 fold & sig. in E2	E2 vs DMSO	1.44285028151059	0.037133163266373	Distal Intergenic	184155	ENSG00000169330	MINAR1	membrane integral NOTCH2 associated receptor 1
chr15	80478913	80479161	*	+ 2 fold & sig. in E2	E2 vs DMSO	1.32524238547397	0.0427398714657623	Intron (ENST00000303329.9/9915, intron 5 of 18)	8670	ENSG00000172379	ARNT2	aryl hydrocarbon receptor nuclear translocator 2
chr15	80586169	80586395	*	+ 2 fold & sig. in E2	E2 vs DMSO	1.18338475820689	0.024649052529243	Intron (ENST00000303329.9/9915, intron 17 of 18)	5066	ENSG00000284059	MIR5572	microRNA 5572
chr15	84081910	84082375	*	+ 2 fold & sig. in E2	E2 vs DMSO	1.26189242552919	0.0293927069599523	Intron (ENST00000558187.5/648809, intron 2 of 5)	1642	NA	EFL1P1	elongation factor like GTPase 1 pseudogene 1
chr15	84912324	84912689	*	+ 2 fold & sig. in E2	E2 vs DMSO	1.13222337185177	3.67491505319198e-05	Intron (ENST00000538177.5/9154, intron 8 of 14)	27646	ENSG00000156222	SLC28A1	solute carrier family 28 member 1
chr15	86866195	86866437	*	+ 2 fold & sig. in E2	E2 vs DMSO	1.79890402739449	0.00305275652043483	Intron (ENST00000614907.3/123624, intron 22 of 22)	-66443	ENSG00000259636	LOC105370954	uncharacterized LOC105370954
chr15	88586691	88587041	*	+ 2 fold & sig. in E2	E2 vs DMSO	1.42053601564046	0.00979007684735774	Exon (ENST00000506090.5/101929743, exon 3 of 3)	16474	ENSG00000249487	LINC01586	long intergenic non-protein coding RNA 1586
chr15	89827928	89828235	*	+ 2 fold & sig. in E2	E2 vs DMSO	2.14678397323124	0.000583819617638974	Distal Intergenic	9719	ENSG00000157823	AP3S2	adaptor related protein complex 3 subunit sigma 2
chr15	92510192	92510589	*	+ 2 fold & sig. in E2	E2 vs DMSO	1.24424599275789	0.0225840080383818	Distal Intergenic	38271	ENSG00000183643	C15orf32	chromosome 15 putative open reading frame 32
chr15	95258706	95259038	*	+ 2 fold & sig. in E2	E2 vs DMSO	1.50652612199116	0.000773768178562571	Intron (ENST00000698309.1/400456, intron 3 of 4)	-67490	ENSG00000259134	LINC00924	long intergenic non-protein coding RNA 924
chr15	95825798	95826036	*	+ 2 fold & sig. in E2	E2 vs DMSO	1.48054299230697	0.0062148659765272	Exon (ENST00000612595.2/ENST00000612595.2, exon 3 of 3)	-164546	NA	LOC112268156	uncharacterized LOC112268156
chr15	96103262	96103564	*	+ 2 fold & sig. in E2	E2 vs DMSO	1.85553394076292	0.000386365834890002	Intron (ENST00000619812.1/112268156, intron 1 of 3)	-18678	NA	LOC105369212	uncharacterized LOC105369212
chr15	98492124	98492348	*	+ 2 fold & sig. in E2	E2 vs DMSO	1.66398284743614	0.000573035758552159	Intron (ENST00000558256.5/283777, intron 2 of 6)	22034	ENSG00000283597	FAM169B	protein FAM169B
chr15	98775637	98775832	*	+ 2 fold & sig. in E2	E2 vs DMSO	1.77195708854364	0.00023397282218875	Intron (ENST00000649865.1/3480, intron 2 of 20)	-8594	ENSG00000264480	MIR4714	microRNA 4714
chr16	10121639	10121847	*	+ 2 fold & sig. in E2	E2 vs DMSO	1.33494662276828	0.0486183296424443	Promoter	-63	ENSG00000183454	GRIN2A	glutamate ionotropic receptor NMDA type subunit 2A
chr16	11127832	11128480	*	+ 2 fold & sig. in E2	E2 vs DMSO	1.81621717410194	3.95939384446945e-05	Intron (ENST00000703130.1/23274, intron 21 of 22)	1822	ENSG00000038532	CLEC16A	C-type lectin domain containing 16A
chr16	1287631	1288204	*	+ 2 fold & sig. in E2	E2 vs DMSO	2.12860056296877	8.14374524131769e-06	Intron (ENST00000561760.1/ENST00000561760.1, intron 2 of 3)	11334	NA	NA	NA
chr16	13940438	13940702	*	+ 2 fold & sig. in E2	E2 vs DMSO	1.23584829418748	0.00635043478578137	Intron (ENST00000682617.1/2072, intron 10 of 11)	2674	ENSG00000175595	ERCC4	ERCC excision repair 4, endonuclease catalytic subunit
chr16	17295517	17295865	*	+ 2 fold & sig. in E2	E2 vs DMSO	1.73784893312708	0.00353822567122683	Intron (ENST00000261381.7/64131, intron 2 of 11)	-36489	ENSG00000103489	XYLT1	xylosyltransferase 1
chr16	23124429	23124581	*	+ 2 fold & sig. in E2	E2 vs DMSO	1.52293919390672	0.0359234978462174	Intron (ENST00000219689.12/57478, intron 1 of 15)	24871	ENSG00000103404	USP31	ubiquitin specific peptidase 31
chr16	23267804	23267974	*	+ 2 fold & sig. in E2	E2 vs DMSO	1.11813452533538	0.0359234978462174	Distal Intergenic	-10257	ENSG00000168447	SCNN1B	sodium channel epithelial 1 subunit beta
chr16	23381361	23381645	*	+ 2 fold & sig. in E2	E2 vs DMSO	1.54802763091234	0.00447382948524454	Downstream (<=300bp)	11647	ENSG00000168434	COG7	component of oligomeric golgi complex 7
chr16	23433488	23433804	*	+ 2 fold & sig. in E2	E2 vs DMSO	1.63043640692001	0.00066030800201087	Exon (ENST00000307149.10/91949, exon 6 of 17)	-16195	ENSG00000168434	COG7	component of oligomeric golgi complex 7
chr16	24088790	24089032	*	+ 2 fold & sig. in E2	E2 vs DMSO	1.50133445504813	0.0200279727645126	Intron (ENST00000321728.12/5579, intron 5 of 16)	53255	ENSG00000166501	PRKCB	protein kinase C beta
chr16	29308029	29308220	*	+ 2 fold & sig. in E2	E2 vs DMSO	1.4835504209229	0.0140627129927047	Intron (ENST00000641956.1/440352, intron 3 of 7)	-4130	NA	SNX29P2	sorting nexin 29 pseudogene 2
chr16	4386454	4386882	*	+ 2 fold & sig. in E2	E2 vs DMSO	2.44382796330909	8.49053619008853e-06	Intron (ENST00000572467.5/100529144, intron 9 of 30)	8458	ENSG00000262246	CORO7	coronin 7
chr16	48405547	48405803	*	+ 2 fold & sig. in E2	E2 vs DMSO	1.63460435985254	0.0086172847801192	Intron (ENST00000568007.5/6477, intron 1 of 6)	-11592	ENSG00000196470	SIAH1	siah E3 ubiquitin protein ligase 1
chr16	53419202	53419561	*	+ 2 fold & sig. in E2	E2 vs DMSO	1.20966070852452	0.039676213211293	Distal Intergenic	-14416	ENSG00000103479	RBL2	RB transcriptional corepressor like 2
chr16	558349	558804	*	+ 2 fold & sig. in E2	E2 vs DMSO	1.46391124006599	0.0405724384316718	Distal Intergenic	-1590	ENSG00000161992	PRR35	proline rich 35
chr16	56279129	56279477	*	+ 2 fold & sig. in E2	E2 vs DMSO	1.24082784891681	0.0312448127215318	Intron (ENST00000262494.13/2775, intron 3 of 7)	3123	ENSG00000087258	GNAO1	G protein subunit alpha o1
chr16	56370618	56370789	*	+ 2 fold & sig. in E2	E2 vs DMSO	1.80660073842656	0.016423625839833	Intron (ENST00000290649.10/267, intron 10 of 13)	-3015	ENSG00000159461	AMFR	autocrine motility factor receptor
chr16	56477223	56477387	*	+ 2 fold & sig. in E2	E2 vs DMSO	1.35468461293721	0.0319119634851092	3' UTR	9106	ENSG00000125124	BBS2	Bardet-Biedl syndrome 2
chr16	588094	588473	*	+ 2 fold & sig. in E2	E2 vs DMSO	1.0020532722737	0.0010189740781322	Promoter	-884	ENSG00000197562	RAB40C	RAB40C, member RAS oncogene family
chr16	64736895	64737142	*	+ 2 fold & sig. in E2	E2 vs DMSO	1.26071225704273	0.0223939234157213	Exon (ENST00000564851.2/ENST00000564851.2, exon 1 of 1)	235807	ENSG00000140937	CDH11	cadherin 11
chr16	70391488	70391721	*	+ 2 fold & sig. in E2	E2 vs DMSO	2.01321880199594	6.56394725995485e-05	Intron (ENST00000566960.1/ENST00000566960.1, intron 1 of 1)	2038	ENSG00000157350	ST3GAL2	ST3 beta-galactoside alpha-2,3-sialyltransferase 2
chr16	72944974	72945339	*	+ 2 fold & sig. in E2	E2 vs DMSO	1.35841090438456	0.0117608842294786	Intron (ENST00000268489.10/463, intron 3 of 9)	-55140	ENSG00000140836	ZFHX3	zinc finger homeobox 3
chr16	78532890	78533226	*	+ 2 fold & sig. in E2	E2 vs DMSO	1.53566139760026	0.00495222337779571	Intron (ENST00000627394.3/51741, intron 8 of 9)	-26322	NA	NA	NA
chr16	78685105	78685303	*	+ 2 fold & sig. in E2	E2 vs DMSO	2.21305404392604	0.000317844907523449	Intron (ENST00000683929.1/51741, intron 8 of 10)	76617	NA	LOC105371354	uncharacterized LOC105371354
chr16	79658297	79658772	*	+ 2 fold & sig. in E2	E2 vs DMSO	1.26710125057106	0.000880158075267681	Distal Intergenic	-17276	ENSG00000260876	LINC01229	long intergenic non-protein coding RNA 1229
chr16	79992078	79992277	*	+ 2 fold & sig. in E2	E2 vs DMSO	1.48757633211613	0.0303217584567547	Distal Intergenic	-73559	NA	LOC105371357	uncharacterized LOC105371357
chr16	81288734	81289039	*	+ 2 fold & sig. in E2	E2 vs DMSO	1.66187459796741	0.00482101487423591	Intron (ENST00000563804.5/53630, intron 9 of 9)	-25905	ENSG00000261609	GAN	gigaxonin
chr16	83942928	83943100	*	+ 2 fold & sig. in E2	E2 vs DMSO	1.47358784794814	0.000569536796602332	Intron (ENST00000561562.5/23417, intron 2 of 3)	-5967	ENSG00000140961	OSGIN1	oxidative stress induced growth inhibitor 1
chr16	84724641	84724869	*	+ 2 fold & sig. in E2	E2 vs DMSO	1.03147435022192	0.00509960939954846	Intron (ENST00000562743.5/9100, intron 1 of 4)	-8269	ENSG00000103194	USP10	ubiquitin specific peptidase 10
chr16	85311247	85311541	*	+ 2 fold & sig. in E2	E2 vs DMSO	2.02160645530969	4.7202389431123e-06	Intron (ENST00000637419.1/23199, intron 1 of 2)	-4922	ENSG00000266307	MIR5093	microRNA 5093
chr16	85464950	85465298	*	+ 2 fold & sig. in E2	E2 vs DMSO	2.47156166847615	3.64721761784736e-08	Intron (ENST00000637419.1/23199, intron 2 of 2)	-90669	ENSG00000131149	GSE1	Gse1 coiled-coil protein
chr16	85475267	85475508	*	+ 2 fold & sig. in E2	E2 vs DMSO	1.5383852066665	3.67491505319198e-05	Intron (ENST00000637419.1/23199, intron 2 of 2)	-80459	ENSG00000131149	GSE1	Gse1 coiled-coil protein
chr16	87407589	87407950	*	+ 2 fold & sig. in E2	E2 vs DMSO	1.34924240764114	0.000278713893307088	3' UTR	9976	ENSG00000140948	ZCCHC14	zinc finger CCHC-type containing 14
chr16	88529525	88529891	*	+ 2 fold & sig. in E2	E2 vs DMSO	1.57405720540018	0.020211491538415	Intron (ENST00000319555.8/161882, intron 6 of 9)	1162	ENSG00000261744	ZFPM1-AS1	ZFPM1 antisense RNA 1
chr16	8951461	8951820	*	+ 2 fold & sig. in E2	E2 vs DMSO	1.27232883892983	0.0130921996157032	Intron (ENST00000344836.9/7874, intron 1 of 30)	-1808	ENSG00000187555	USP7	ubiquitin specific peptidase 7
chr17	10216009	10216346	*	+ 2 fold & sig. in E2	E2 vs DMSO	1.85610531346978	0.00311870961439994	Distal Intergenic	-17403	ENSG00000007237	GAS7	growth arrest specific 7
chr17	13626751	13627046	*	+ 2 fold & sig. in E2	E2 vs DMSO	1.39725215387724	0.0217266260383785	Distal Intergenic	-24822	ENSG00000153976	HS3ST3A1	heparan sulfate-glucosamine 3-sulfotransferase 3A1
chr17	15178163	15178396	*	+ 2 fold & sig. in E2	E2 vs DMSO	2.34498200626021	0.000810789356878805	Distal Intergenic	53526	ENSG00000109099	PMP22	peripheral myelin protein 22
chr17	1731046	1731324	*	+ 2 fold & sig. in E2	E2 vs DMSO	1.93379918459137	0.0197864095658888	Promoter	0	ENSG00000167716	WDR81	WD repeat domain 81
chr17	17755642	17755963	*	+ 2 fold & sig. in E2	E2 vs DMSO	1.94365153402858	0.000189267411424226	Intron (ENST00000353383.6/10743, intron 2 of 5)	14858	ENSG00000237328	RAI1-AS1	RAI1 antisense RNA 1
chr17	19551213	19551444	*	+ 2 fold & sig. in E2	E2 vs DMSO	1.57178638726935	0.00434282540166267	Exon (ENST00000584348.5/55244, exon 6 of 7)	-4065	ENSG00000142494	SLC47A1	solute carrier family 47 member 1
chr17	20611443	20611647	*	+ 2 fold & sig. in E2	E2 vs DMSO	1.41693630280763	0.0299411279475859	Distal Intergenic	21587	ENSG00000227685	LINC02088	long intergenic non-protein coding RNA 2088
chr17	29627833	29628227	*	+ 2 fold & sig. in E2	E2 vs DMSO	1.48125127819514	0.000344181874043478	3' UTR	-4921	ENSG00000167549	CORO6	coronin 6
chr17	40335355	40335513	*	+ 2 fold & sig. in E2	E2 vs DMSO	1.4565245526094	0.0149333335814552	Intron (ENST00000254066.10/5914, intron 2 of 8)	-5875	ENSG00000131759	RARA	retinoic acid receptor alpha
chr17	40463804	40464203	*	+ 2 fold & sig. in E2	E2 vs DMSO	2.68688794312424	1.40549592411731e-07	Distal Intergenic	14445	ENSG00000131746	TNS4	tensin 4
chr17	40464513	40464767	*	+ 2 fold & sig. in E2	E2 vs DMSO	2.43477537914344	4.41896977869838e-06	Distal Intergenic	13881	ENSG00000131746	TNS4	tensin 4
chr17	40555559	40555758	*	+ 2 fold & sig. in E2	E2 vs DMSO	1.99293264937527	0.000475957307887961	5' UTR	5255	ENSG00000126353	CCR7	C-C motif chemokine receptor 7
chr17	41511738	41512040	*	+ 2 fold & sig. in E2	E2 vs DMSO	1.03608445300113	0.0170105319545115	Distal Intergenic	2714	ENSG00000171346	KRT15	keratin 15
chr17	41705738	41705976	*	+ 2 fold & sig. in E2	E2 vs DMSO	1.35971773218333	0.0358776026015871	Distal Intergenic	-6355	ENSG00000184502	GAST	gastrin
chr17	49630215	49630515	*	+ 2 fold & sig. in E2	E2 vs DMSO	1.71976183652222	0.00012775259680501	Intron (ENST00000504102.6/8405, intron 1 of 9)	-10911	ENSG00000121067	SPOP	speckle type BTB/POZ protein
chr17	52410013	52410163	*	+ 2 fold & sig. in E2	E2 vs DMSO	2.15424380329977	0.0252705519713557	Intron (ENST00000572848.1/105371830, intron 1 of 3)	19498	ENSG00000263317	LINC01982	long intergenic non-protein coding RNA 1982
chr17	5669202	5669446	*	+ 2 fold & sig. in E2	E2 vs DMSO	1.75411989731092	0.0111309106931024	Distal Intergenic	34610	NA	NA	NA
chr17	57096636	57097145	*	+ 2 fold & sig. in E2	E2 vs DMSO	2.73246014702672	4.88225450746863e-07	Promoter	0	ENSG00000121057	AKAP1	A-kinase anchoring protein 1
chr17	57269631	57269965	*	+ 2 fold & sig. in E2	E2 vs DMSO	1.65181487321081	0.00555946010537936	Intron (ENST00000416426.6/124540, intron 5 of 13)	7480	ENSG00000153944	MSI2	musashi RNA binding protein 2
chr17	57835434	57835601	*	+ 2 fold & sig. in E2	E2 vs DMSO	1.12530611694288	0.00051391185366466	3' UTR	14396	ENSG00000181610	MRPS23	mitochondrial ribosomal protein S23
chr17	64580739	64581147	*	+ 2 fold & sig. in E2	E2 vs DMSO	2.29991614622636	3.98617332130106e-05	3' UTR	17298	ENSG00000108854	SMURF2	SMAD specific E3 ubiquitin protein ligase 2
chr17	66508349	66508654	*	+ 2 fold & sig. in E2	E2 vs DMSO	1.32380579961779	0.000633335445941077	Intron (ENST00000413366.8/5578, intron 3 of 16)	-91495	NA	PRKCA-AS1	PRKCA antisense RNA 1
chr17	67411324	67411761	*	+ 2 fold & sig. in E2	E2 vs DMSO	1.68286360636916	0.000240688207220842	Intron (ENST00000581322.6/26207, intron 1 of 8)	-25598	NA	NA	NA
chr17	72362540	72362724	*	+ 2 fold & sig. in E2	E2 vs DMSO	1.42369407248708	0.0131204223802882	Intron (ENST00000648631.1/100499467, intron 5 of 5)	19600	ENSG00000264026	LINC02003	long intergenic non-protein coding RNA 2003
chr17	72517859	72518153	*	+ 2 fold & sig. in E2	E2 vs DMSO	1.48535340525311	0.000139351783407289	Promoter	-767	ENSG00000227036	LINC00673	long intergenic non-protein coding RNA 673
chr17	73549951	73550289	*	+ 2 fold & sig. in E2	E2 vs DMSO	1.85464489536179	1.35893744201377e-05	Intron (ENST00000392650.8/54549, intron 1 of 44)	36339	ENSG00000264985	LOC101928251	uncharacterized LOC101928251
chr17	74751487	74751823	*	+ 2 fold & sig. in E2	E2 vs DMSO	1.34252375914776	0.000159015812682335	Intron (ENST00000262613.10/9368, intron 1 of 5)	-2575	NA	SLC9A3R1-AS1	SLC9A3R1 antisense RNA 1
chr17	74758019	74758735	*	+ 2 fold & sig. in E2	E2 vs DMSO	1.56912708280447	3.67157285070177e-07	Intron (ENST00000262613.10/9368, intron 1 of 5)	-3268	ENSG00000109062	SLC9A3R1	SLC9A3 regulator 1
chr17	75864556	75864841	*	+ 2 fold & sig. in E2	E2 vs DMSO	1.32486461644589	0.0100512996283578	Distal Intergenic	-8049	ENSG00000132471	WBP2	WW domain binding protein 2
chr17	76601920	76602219	*	+ 2 fold & sig. in E2	E2 vs DMSO	1.13386685548461	0.00461914947139162	Intron (ENST00000701062.1/100507246, intron 2 of 3)	-14964	ENSG00000070731	ST6GALNAC2	ST6 N-acetylgalactosaminide alpha-2,6-sialyltransferase 2
chr17	77328960	77329177	*	+ 2 fold & sig. in E2	E2 vs DMSO	1.55531802400917	0.000223765634012638	Intron (ENST00000589070.1/10801, intron 1 of 1)	5254	ENSG00000184640	SEPTIN9	septin 9
chr17	77616312	77616680	*	+ 2 fold & sig. in E2	E2 vs DMSO	1.02866731517103	0.041350341746165	Intron (ENST00000649512.1/107985079, intron 3 of 4)	25780	NA	LOC107985079	uncharacterized LOC107985079
chr17	79005944	79006240	*	+ 2 fold & sig. in E2	E2 vs DMSO	1.40307426364388	0.0401619247987818	Promoter	0	ENSG00000171302	CANT1	calcium activated nucleotidase 1
chr17	79017500	79018033	*	+ 2 fold & sig. in E2	E2 vs DMSO	2.4010980198089	5.91282325770992e-07	Distal Intergenic	-4781	ENSG00000173918	C1QTNF1	C1q and TNF related 1
chr17	80673398	80673911	*	+ 2 fold & sig. in E2	E2 vs DMSO	1.30490078493305	0.000648813749377279	Intron (ENST00000574767.5/57521, intron 2 of 11)	-35022	ENSG00000141564	RPTOR	regulatory associated protein of MTOR complex 1
chr17	81647072	81647539	*	+ 2 fold & sig. in E2	E2 vs DMSO	1.3289414806438	0.0346437559724216	3' UTR	926	ENSG00000182446	NPLOC4	NPL4 homolog, ubiquitin recognition factor
chr17	82614356	82614571	*	+ 2 fold & sig. in E2	E2 vs DMSO	2.31668996815073	7.05010656877722e-05	3' UTR	2948	ENSG00000141580	WDR45B	WD repeat domain 45B
chr17	83195145	83195552	*	+ 2 fold & sig. in E2	E2 vs DMSO	1.49576758408601	4.241064897153e-05	Exon (ENST00000651869.1/101929650, exon 3 of 4)	-16444	NA	LOC101929650	uncharacterized LOC101929650
chr17	9054194	9054455	*	+ 2 fold & sig. in E2	E2 vs DMSO	1.1868901365485	0.00529568740559781	Intron (ENST00000173229.7/9423, intron 2 of 6)	32684	ENSG00000065320	NTN1	netrin 1
chr18	11269393	11269639	*	+ 2 fold & sig. in E2	E2 vs DMSO	2.16602628192069	0.00700577648066398	Distal Intergenic	108770	NA	LOC107985173	uncharacterized LOC107985173
chr18	13480972	13481179	*	+ 2 fold & sig. in E2	E2 vs DMSO	2.05342713444732	0.0318692169213563	Intron (ENST00000679177.1/753, intron 3 of 5)	-10149	NA	NA	NA
chr18	21439429	21439749	*	+ 2 fold & sig. in E2	E2 vs DMSO	1.88982552226121	0.00888157354171245	Exon (ENST00000424526.7/80000, exon 8 of 33)	-9886	ENSG00000141449	GREB1L	GREB1 like retinoic acid receptor coactivator
chr18	21453562	21453818	*	+ 2 fold & sig. in E2	E2 vs DMSO	1.67127478578661	0.0108719355153955	Intron (ENST00000424526.7/80000, intron 14 of 32)	2463	ENSG00000141449	GREB1L	GREB1 like retinoic acid receptor coactivator
chr18	44066591	44066913	*	+ 2 fold & sig. in E2	E2 vs DMSO	1.1569178610299	0.044065791216574	Distal Intergenic	-148058	NA	NA	NA
chr18	44729593	44730119	*	+ 2 fold & sig. in E2	E2 vs DMSO	1.54386530332647	7.43823763632784e-05	Intron (ENST00000426838.8/26040, intron 2 of 3)	28255	ENSG00000152217	SETBP1	SET binding protein 1
chr18	44831689	44831937	*	+ 2 fold & sig. in E2	E2 vs DMSO	2.1630087757258	0.00261734310878323	Intron (ENST00000426838.8/26040, intron 2 of 3)	130351	ENSG00000152217	SETBP1	SET binding protein 1
chr18	45836250	45836497	*	+ 2 fold & sig. in E2	E2 vs DMSO	1.31312909194019	0.0191250818690127	Intron (ENST00000389474.8/284266, intron 1 of 5)	-1344	ENSG00000197046	SIGLEC15	sialic acid binding Ig like lectin 15
chr18	48974504	48974839	*	+ 2 fold & sig. in E2	E2 vs DMSO	2.49572891721859	0.000388087100326776	Distal Intergenic	-10563	NA	LOC105372108	uncharacterized LOC105372108
chr18	48983070	48983297	*	+ 2 fold & sig. in E2	E2 vs DMSO	2.33086780282193	0.000174569045196754	Distal Intergenic	-19129	NA	LOC105372108	uncharacterized LOC105372108
chr18	57728158	57728568	*	+ 2 fold & sig. in E2	E2 vs DMSO	1.82738553678078	6.13766450300717e-05	Intron (ENST00000588925.5/105372141, intron 2 of 5)	3186	ENSG00000081923	ATP8B1	ATPase phospholipid transporting 8B1
chr18	59954317	59954647	*	+ 2 fold & sig. in E2	E2 vs DMSO	1.66355968017577	0.000252494658554716	Distal Intergenic	54281	ENSG00000141682	PMAIP1	phorbol-12-myristate-13-acetate-induced protein 1
chr18	76428465	76428669	*	+ 2 fold & sig. in E2	E2 vs DMSO	1.45972804268227	0.00547704703148634	Intron (ENST00000443185.7/9658, intron 3 of 6)	-48180	ENSG00000101493	ZNF516	zinc finger protein 516
chr18	9869998	9870232	*	+ 2 fold & sig. in E2	E2 vs DMSO	1.29288845041986	0.0099991356412309	Distal Intergenic	13954	ENSG00000168461	RAB31	RAB31, member RAS oncogene family
chr19	10486588	10486963	*	+ 2 fold & sig. in E2	E2 vs DMSO	2.49875139227473	7.86485736863823e-08	3' UTR	2472	ENSG00000079999	KEAP1	kelch like ECH associated protein 1
chr19	1208134	1208349	*	+ 2 fold & sig. in E2	E2 vs DMSO	1.48422751398078	0.0095316524477029	Intron (ENST00000585748.2/6794, intron 3 of 4)	1043	ENSG00000118046	STK11	serine/threonine kinase 11
chr19	12908642	12908862	*	+ 2 fold & sig. in E2	E2 vs DMSO	1.24801701557967	0.0442452019088574	Intron (ENST00000591050.1/2639, intron 2 of 2)	-8158	ENSG00000161860	SYCE2	synaptonemal complex central element protein 2
chr19	13941838	13942020	*	+ 2 fold & sig. in E2	E2 vs DMSO	1.88629249807296	0.0148415227449485	Intron (ENST00000538517.6/79883, intron 1 of 5)	-3362	ENSG00000132000	PODNL1	podocan like 1
chr19	14844126	14844527	*	+ 2 fold & sig. in E2	E2 vs DMSO	1.4007774092268	0.00326443293911812	Intron (ENST00000641129.1/390892, intron 1 of 1)	4395	ENSG00000127515	OR7A10	olfactory receptor family 7 subfamily A member 10
chr19	15593748	15594001	*	+ 2 fold & sig. in E2	E2 vs DMSO	1.43916623097967	0.0226638398022751	Distal Intergenic	-21217	ENSG00000186526	CYP4F8	cytochrome P450 family 4 subfamily F member 8
chr19	16003583	16003834	*	+ 2 fold & sig. in E2	E2 vs DMSO	1.87817649469452	0.000185009286993716	Distal Intergenic	-11453	ENSG00000205396	LINC00661	long intergenic non-protein coding RNA 661
chr19	16210287	16210574	*	+ 2 fold & sig. in E2	E2 vs DMSO	1.50324846110676	0.0364447293461507	Exon (ENST00000444449.6/8907, exon 6 of 13)	1328	ENSG00000072958	AP1M1	adaptor related protein complex 1 subunit mu 1
chr19	16582000	16582421	*	+ 2 fold & sig. in E2	E2 vs DMSO	2.09495512895921	8.46638101314458e-07	Intron (ENST00000409035.1/9441, intron 2 of 11)	5180	ENSG00000105085	MED26	mediator complex subunit 26
chr19	18999460	18999871	*	+ 2 fold & sig. in E2	E2 vs DMSO	1.53989824933294	7.70855627572053e-06	Intron (ENST00000593795.5/10147, intron 1 of 5)	1803	ENSG00000064607	SUGP2	SURP and G-patch domain containing 2
chr19	1907508	1908087	*	+ 2 fold & sig. in E2	E2 vs DMSO	1.06044921515496	0.0031619270022108	Promoter	0	ENSG00000213638	ADAT3	adenosine deaminase tRNA specific 3
chr19	2670367	2670768	*	+ 2 fold & sig. in E2	E2 vs DMSO	2.83327492042905	5.72234900889226e-06	Intron (ENST00000382159.8/2788, intron 1 of 4)	12923	ENSG00000176533	GNG7	G protein subunit gamma 7
chr19	33627662	33627836	*	+ 2 fold & sig. in E2	E2 vs DMSO	1.61396821810406	0.0185019959717247	Intron (ENST00000650847.1/64377, intron 1 of 4)	5678	ENSG00000124302	CHST8	carbohydrate sulfotransferase 8
chr19	33627941	33628129	*	+ 2 fold & sig. in E2	E2 vs DMSO	2.20349686972587	0.0049493105013663	Intron (ENST00000650847.1/64377, intron 1 of 4)	5957	ENSG00000124302	CHST8	carbohydrate sulfotransferase 8
chr19	35317441	35317804	*	+ 2 fold & sig. in E2	E2 vs DMSO	1.81125377078923	1.39838443064213e-07	Intron (ENST00000700969.1/ENST00000700969.1, intron 1 of 1)	-1457	ENSG00000012124	CD22	CD22 molecule
chr19	35494029	35494305	*	+ 2 fold & sig. in E2	E2 vs DMSO	1.88602800663012	0.000556961487158356	Intron (ENST00000479340.1/388533, intron 1 of 5)	1253	ENSG00000188508	KRTDAP	keratinocyte differentiation associated protein
chr19	35554105	35554516	*	+ 2 fold & sig. in E2	E2 vs DMSO	2.00526083441207	0.000170659198171526	Intron (ENST00000262623.4/495, intron 16 of 21)	3221	ENSG00000105675	ATP4A	ATPase H+/K+ transporting subunit alpha
chr19	37966728	37967009	*	+ 2 fold & sig. in E2	E2 vs DMSO	1.06465614563524	0.0147812168459488	Intron (ENST00000222345.11/23094, intron 1 of 21)	34382	ENSG00000105738	SIPA1L3	signal induced proliferation associated 1 like 3
chr19	38731815	38732244	*	+ 2 fold & sig. in E2	E2 vs DMSO	1.28985115802029	9.54368325606936e-05	Intron (ENST00000594552.5/147968, intron 3 of 5)	3161	ENSG00000182472	CAPN12	calpain 12
chr19	39187761	39188020	*	+ 2 fold & sig. in E2	E2 vs DMSO	1.19858899444543	0.00445595236422869	Distal Intergenic	-8944	ENSG00000188505	NCCRP1	NCCRP1, F-box associated domain containing
chr19	41052194	41052728	*	+ 2 fold & sig. in E2	E2 vs DMSO	2.08845902595984	3.20832627664602e-05	Exon (ENST00000594920.2/ENST00000594920.2, exon 7 of 9)	-35723	ENSG00000197838	CYP2A13	cytochrome P450 family 2 subfamily A member 13
chr19	46903424	46903709	*	+ 2 fold & sig. in E2	E2 vs DMSO	1.94263440358324	0.000388054058903149	Intron (ENST00000672722.1/2909, intron 1 of 6)	-17074	ENSG00000160007	ARHGAP35	Rho GTPase activating protein 35
chr19	56724762	56725017	*	+ 2 fold & sig. in E2	E2 vs DMSO	2.87957245758357	0.00350418751105292	Intron (ENST00000650950.1/101929059, intron 5 of 5)	17364	NA	LOC105372473	uncharacterized LOC105372473
chr19	58518239	58518572	*	+ 2 fold & sig. in E2	E2 vs DMSO	1.3964100359705	0.00210201544955601	Intron (ENST00000354590.7/84878, intron 1 of 2)	982	ENSG00000119574	ZBTB45	zinc finger and BTB domain containing 45
chr19	6681836	6682011	*	+ 2 fold & sig. in E2	E2 vs DMSO	2.12013662625542	0.00559052485787332	3' UTR	1349	ENSG00000125730	C3	complement C3
chr2	100543449	100543736	*	+ 2 fold & sig. in E2	E2 vs DMSO	2.54051763262247	2.39396215048521e-05	Distal Intergenic	-19257	ENSG00000115539	PDCL3	phosducin like 3
chr2	10170298	10170549	*	+ 2 fold & sig. in E2	E2 vs DMSO	1.42039869805198	0.0337737590141349	Intron (ENST00000641498.1/6241, intron 11 of 11)	-15092	NA	NA	NA
chr2	102046340	102046605	*	+ 2 fold & sig. in E2	E2 vs DMSO	1.24818687130828	0.0180718012688921	Intron (ENST00000657796.1/107985926, intron 4 of 5)	8377	NA	LOC107985926	uncharacterized LOC107985926
chr2	105391338	105391513	*	+ 2 fold & sig. in E2	E2 vs DMSO	1.74763886253841	0.021826308089148	Intron (ENST00000409177.6/2274, intron 1 of 5)	5184	ENSG00000115641	FHL2	four and a half LIM domains 2
chr2	105403964	105404626	*	+ 2 fold & sig. in E2	E2 vs DMSO	1.7502798625225	0.000388757583892519	Intron (ENST00000393352.7/2274, intron 1 of 5)	-4297	ENSG00000115641	FHL2	four and a half LIM domains 2
chr2	111140911	111141147	*	+ 2 fold & sig. in E2	E2 vs DMSO	1.03580777219721	0.0407517006988267	Intron (ENST00000357757.6/10018, intron 3 of 5)	17159	ENSG00000153094	BCL2L11	BCL2 like 11
chr2	11120248	11120510	*	+ 2 fold & sig. in E2	E2 vs DMSO	1.54785919868584	0.000161128457020407	Intron (ENST00000536743.5/285150, intron 6 of 7)	11578	ENSG00000145063	FLJ33534	uncharacterized LOC285150
chr2	111535452	111535873	*	+ 2 fold & sig. in E2	E2 vs DMSO	1.41713885531357	0.0287912351983502	Intron (ENST00000630717.1/ENST00000630717.1, intron 1 of 1)	-12076	ENSG00000172965	MIR4435-2HG	MIR4435-2 host gene
chr2	11588224	11588752	*	+ 2 fold & sig. in E2	E2 vs DMSO	1.58113133146403	6.3459326209809e-06	Promoter	0	ENSG00000196208	GREB1	growth regulating estrogen receptor binding 1
chr2	11588814	11589000	*	+ 2 fold & sig. in E2	E2 vs DMSO	1.19184266662785	0.0386123957358518	Exon (ENST00000381486.7/9687, exon 10 of 33)	558	ENSG00000196208	GREB1	growth regulating estrogen receptor binding 1
chr2	11589343	11589575	*	+ 2 fold & sig. in E2	E2 vs DMSO	1.95083377524458	2.00787299364816e-05	Intron (ENST00000381486.7/9687, intron 10 of 32)	1087	ENSG00000196208	GREB1	growth regulating estrogen receptor binding 1
chr2	120262195	120262419	*	+ 2 fold & sig. in E2	E2 vs DMSO	1.35845777706415	0.0436512446087726	Intron (ENST00000447591.5/5899, intron 1 of 3)	8744	ENSG00000144118	RALB	RAS like proto-oncogene B
chr2	120465148	120465430	*	+ 2 fold & sig. in E2	E2 vs DMSO	1.77646023262853	0.010520722238557	Exon (ENST00000622953.1/84931, exon 1 of 1)	788	ENSG00000280409	LINC01101	long intergenic non-protein coding RNA 1101
chr2	128273181	128273555	*	+ 2 fold & sig. in E2	E2 vs DMSO	2.05175167841205	5.02646723065741e-06	Intron (ENST00000469019.1/9394, intron 1 of 2)	16641	ENSG00000136720	HS6ST1	heparan sulfate 6-O-sulfotransferase 1
chr2	128280803	128281135	*	+ 2 fold & sig. in E2	E2 vs DMSO	2.3011023156272	3.01405977283622e-06	Intron (ENST00000469019.1/9394, intron 1 of 2)	9061	ENSG00000136720	HS6ST1	heparan sulfate 6-O-sulfotransferase 1
chr2	128281915	128282281	*	+ 2 fold & sig. in E2	E2 vs DMSO	2.31263520711962	1.85446048393924e-07	Intron (ENST00000469019.1/9394, intron 1 of 2)	7915	ENSG00000136720	HS6ST1	heparan sulfate 6-O-sulfotransferase 1
chr2	128448812	128449203	*	+ 2 fold & sig. in E2	E2 vs DMSO	2.34098094662568	0.000517630949584801	Distal Intergenic	-129944	ENSG00000136720	HS6ST1	heparan sulfate 6-O-sulfotransferase 1
chr2	129104305	129104644	*	+ 2 fold & sig. in E2	E2 vs DMSO	1.57337475361102	0.0283154868222602	Distal Intergenic	169204	ENSG00000204460	LINC01854	long intergenic non-protein coding RNA 1854
chr2	131478773	131479194	*	+ 2 fold & sig. in E2	E2 vs DMSO	2.28385015782497	2.12765770343411e-05	Promoter	56	ENSG00000075886	TUBA3D	tubulin alpha 3d
chr2	131563912	131564387	*	+ 2 fold & sig. in E2	E2 vs DMSO	2.07810325723442	0.00011480606342272	Intron (ENST00000652012.1/ENST00000652012.1, intron 2 of 2)	-27365	NA	POTEKP	POTE ankyrin domain family member K, pseudogene
chr2	132582425	132582814	*	+ 2 fold & sig. in E2	E2 vs DMSO	1.93570474432317	6.67968873542479e-05	Intron (ENST00000329321.4/2863, intron 1 of 1)	-21627	ENSG00000183840	GPR39	G protein-coupled receptor 39
chr2	134823335	134823735	*	+ 2 fold & sig. in E2	E2 vs DMSO	2.10085296063121	4.14332356861196e-05	Intron (ENST00000392929.6/100129961, intron 3 of 3)	-14881	ENSG00000153086	ACMSD	aminocarboxymuconate semialdehyde decarboxylase
chr2	137490985	137491287	*	+ 2 fold & sig. in E2	E2 vs DMSO	1.34149609242387	0.0193194737291827	Intron (ENST00000409968.6/80731, intron 15 of 27)	-150956	ENSG00000144229	THSD7B	thrombospondin type 1 domain containing 7B
chr2	144102392	144102732	*	+ 2 fold & sig. in E2	E2 vs DMSO	1.38003439169291	0.0335312567915801	Intron (ENST00000392869.6/79712, intron 5 of 10)	43173	ENSG00000121964	GTDC1	glycosyltransferase like domain containing 1
chr2	156537030	156537436	*	+ 2 fold & sig. in E2	E2 vs DMSO	1.1400681470682	0.0134842414597276	Intron (ENST00000310454.10/2820, intron 6 of 16)	-33736	ENSG00000115159	GPD2	glycerol-3-phosphate dehydrogenase 2
chr2	157125210	157125623	*	+ 2 fold & sig. in E2	E2 vs DMSO	1.60429150093112	0.000230560059543287	Distal Intergenic	91373	NA	LOC105373709	uncharacterized LOC105373709
chr2	157269088	157269522	*	+ 2 fold & sig. in E2	E2 vs DMSO	1.33250733728631	0.00612342929767765	Intron (ENST00000259056.5/11227, intron 1 of 9)	11383	ENSG00000136542	GALNT5	polypeptide N-acetylgalactosaminyltransferase 5
chr2	158044232	158044454	*	+ 2 fold & sig. in E2	E2 vs DMSO	2.33797199271994	0.00203651970782398	Intron (ENST00000605860.5/151531, intron 3 of 9)	-57414	ENSG00000007001	UPP2	uridine phosphorylase 2
chr2	158727346	158727527	*	+ 2 fold & sig. in E2	E2 vs DMSO	2.16970265906759	3.17719745735295e-07	Intron (ENST00000449526.1/ENST00000449526.1, intron 2 of 2)	-3366	ENSG00000204380	PKP4-AS1	PKP4 antisense RNA 1
chr2	159976857	159977121	*	+ 2 fold & sig. in E2	E2 vs DMSO	1.63754187309797	0.00875167777618474	Intron (ENST00000283243.13/22925, intron 15 of 29)	-31857	ENSG00000153246	PLA2R1	phospholipase A2 receptor 1
chr2	165413168	165413480	*	+ 2 fold & sig. in E2	E2 vs DMSO	1.75552751490172	0.00256212746391735	Distal Intergenic	-56167	ENSG00000178662	CSRNP3	cysteine and serine rich nuclear protein 3
chr2	1692527	1692931	*	+ 2 fold & sig. in E2	E2 vs DMSO	2.35328507739774	0.00149429833105325	Promoter	0	ENSG00000130508	PXDN	peroxidasin
chr2	172274660	172274915	*	+ 2 fold & sig. in E2	E2 vs DMSO	1.66750933098466	0.00647528410262761	Intron (ENST00000667725.1/107985960, intron 2 of 4)	-26230	NA	LOC107985960	uncharacterized LOC107985960
chr2	173883399	173883675	*	+ 2 fold & sig. in E2	E2 vs DMSO	1.67526280395843	0.00675634103275606	3' UTR	33157	ENSG00000172845	SP3	Sp3 transcription factor
chr2	179646942	179647171	*	+ 2 fold & sig. in E2	E2 vs DMSO	1.64739264105506	0.00887182412815944	Intron (ENST00000410066.7/151126, intron 3 of 9)	-9616	ENSG00000144331	ZNF385B	zinc finger protein 385B
chr2	200310694	200310980	*	+ 2 fold & sig. in E2	E2 vs DMSO	1.64172894601174	0.00123819775631539	Intron (ENST00000439084.5/26010, intron 1 of 4)	1744	ENSG00000196141	SPATS2L	spermatogenesis associated serine rich 2 like
chr2	200408527	200408747	*	+ 2 fold & sig. in E2	E2 vs DMSO	1.18361632353397	0.0102509849335817	Intron (ENST00000439084.5/26010, intron 2 of 4)	15450	ENSG00000196141	SPATS2L	spermatogenesis associated serine rich 2 like
chr2	201947309	201947544	*	+ 2 fold & sig. in E2	E2 vs DMSO	1.21624729106728	0.0286947263458251	Distal Intergenic	-86311	ENSG00000155760	FZD7	frizzled class receptor 7
chr2	203596083	203596474	*	+ 2 fold & sig. in E2	E2 vs DMSO	1.23147140456273	0.00877065696168256	Distal Intergenic	-60748	ENSG00000173166	RAPH1	Ras association (RalGDS/AF-6) and pleckstrin homology domains 1
chr2	217090890	217091156	*	+ 2 fold & sig. in E2	E2 vs DMSO	1.51965115577154	0.0040018206977073	Intron (ENST00000695932.1/105373877, intron 3 of 11)	-26072	NA	LOC105373873	uncharacterized LOC105373873
chr2	217704123	217704365	*	+ 2 fold & sig. in E2	E2 vs DMSO	1.97236814101111	3.29169240199343e-05	Intron (ENST00000676082.1/729582, intron 1 of 9)	52190	NA	DIRC3	disrupted in renal carcinoma 3
chr2	219478427	219478916	*	+ 2 fold & sig. in E2	E2 vs DMSO	2.91248575629579	3.20375468134288e-09	Intron (ENST00000312358.12/10290, intron 22 of 40)	6765	ENSG00000072195	SPEG	striated muscle enriched protein kinase
chr2	221817039	221817276	*	+ 2 fold & sig. in E2	E2 vs DMSO	1.60450983667014	0.0255654157336582	Distal Intergenic	179496	NA	LOC105373899	uncharacterized LOC105373899
chr2	225737675	225738007	*	+ 2 fold & sig. in E2	E2 vs DMSO	1.85794113729968	9.68144177499778e-05	Distal Intergenic	154767	ENSG00000144460	NYAP2	neuronal tyrosine-phosphorylated phosphoinositide-3-kinase adaptor 2
chr2	226257032	226257383	*	+ 2 fold & sig. in E2	E2 vs DMSO	1.45543130160687	0.00254633109401891	Distal Intergenic	401410	ENSG00000263363	MIR5702	microRNA 5702
chr2	231519404	231519815	*	+ 2 fold & sig. in E2	E2 vs DMSO	2.23421899560923	6.85887803055578e-07	Exon (ENST00000671602.1/10316, exon 2 of 2)	1252	ENSG00000171596	NMUR1	neuromedin U receptor 1
chr2	234425726	234426042	*	+ 2 fold & sig. in E2	E2 vs DMSO	1.67502352335974	0.000554721212647406	Distal Intergenic	28553	ENSG00000231682	LINC01891	long intergenic non-protein coding RNA 1891
chr2	237319237	237319577	*	+ 2 fold & sig. in E2	E2 vs DMSO	1.57116322382392	0.000438281940175662	Distal Intergenic	10603	ENSG00000163359	COL6A3	collagen type VI alpha 3 chain
chr2	237539721	237540029	*	+ 2 fold & sig. in E2	E2 vs DMSO	1.59464173084146	6.94617484584406e-05	Promoter	-420	ENSG00000115648	MLPH	melanophilin
chr2	238564428	238564645	*	+ 2 fold & sig. in E2	E2 vs DMSO	1.76951622314502	0.000447635285545628	Intron (ENST00000653335.1/105373962, intron 1 of 2)	-9374	ENSG00000225493	LINC01107	long intergenic non-protein coding RNA 1107
chr2	28208060	28208299	*	+ 2 fold & sig. in E2	E2 vs DMSO	1.52330415659153	0.0197371662905683	Intron (ENST00000344773.6/9577, intron 7 of 12)	102191	ENSG00000223522	LOC100505716	uncharacterized LOC100505716
chr2	28342353	28342803	*	+ 2 fold & sig. in E2	E2 vs DMSO	2.34609874379347	1.21098462243079e-07	Distal Intergenic	-31793	ENSG00000223522	LOC100505716	uncharacterized LOC100505716
chr2	28896962	28897216	*	+ 2 fold & sig. in E2	E2 vs DMSO	1.80423807630378	0.000380590522100803	Intron (ENST00000407426.8/23160, intron 1 of 17)	1158	ENSG00000163811	WDR43	WD repeat domain 43
chr2	37085906	37086144	*	+ 2 fold & sig. in E2	E2 vs DMSO	1.15684517391984	0.0245576403775094	Intron (ENST00000281932.6/253635, intron 1 of 6)	1388	ENSG00000152133	GPATCH11	G-patch domain containing 11
chr2	38905891	38906255	*	+ 2 fold & sig. in E2	E2 vs DMSO	1.78416320573136	0.000352992893600861	Intron (ENST00000441049.5/100271715, intron 6 of 8)	-13108	ENSG00000214694	ARHGEF33	Rho guanine nucleotide exchange factor 33
chr2	39679832	39680295	*	+ 2 fold & sig. in E2	E2 vs DMSO	1.2174580830307	0.00545581808788576	Intron (ENST00000437068.5/130733, intron 1 of 2)	-7012	ENSG00000152154	TMEM178A	transmembrane protein 178A
chr2	45774590	45774959	*	+ 2 fold & sig. in E2	E2 vs DMSO	2.38313152515788	0.000187262259563598	Intron (ENST00000421201.1/5581, intron 2 of 2)	76608	ENSG00000171132	PRKCE	protein kinase C epsilon
chr2	46025564	46026004	*	+ 2 fold & sig. in E2	E2 vs DMSO	1.12766677504082	0.0414285313620791	Intron (ENST00000306156.8/5581, intron 10 of 14)	24662	ENSG00000171132	PRKCE	protein kinase C epsilon
chr2	46985171	46985354	*	+ 2 fold & sig. in E2	E2 vs DMSO	1.04745099962486	0.00665893292317353	Intron (ENST00000698500.1/57217, intron 8 of 21)	6431	ENSG00000068724	TTC7A	tetratricopeptide repeat domain 7A
chr2	47063558	47063842	*	+ 2 fold & sig. in E2	E2 vs DMSO	1.35646221055445	0.00558221824758146	Intron (ENST00000698500.1/57217, intron 21 of 21)	17243	ENSG00000068724	TTC7A	tetratricopeptide repeat domain 7A
chr2	53475389	53475656	*	+ 2 fold & sig. in E2	E2 vs DMSO	1.2158218134377	0.017177226116327	Distal Intergenic	-4760	NA	NA	NA
chr2	55392117	55392295	*	+ 2 fold & sig. in E2	E2 vs DMSO	1.58058516536294	0.00527292225690932	Intron (ENST00000336838.10/55704, intron 2 of 32)	2350	ENSG00000115355	CCDC88A	coiled-coil domain containing 88A
chr2	567017	567301	*	+ 2 fold & sig. in E2	E2 vs DMSO	1.88318274176622	0.00214452729695291	Intron (ENST00000444079.1/105373352, intron 4 of 4)	7889	ENSG00000233633	LOC105373352	uncharacterized LOC105373352
chr2	67875005	67875221	*	+ 2 fold & sig. in E2	E2 vs DMSO	2.21144459301924	0.00153253533485395	Distal Intergenic	-49443	ENSG00000237013	LINC01812	long intergenic non-protein coding RNA 1812
chr2	7011780	7012059	*	+ 2 fold & sig. in E2	E2 vs DMSO	1.29948285802641	0.0272027957116144	Intron (ENST00000320892.11/9781, intron 3 of 8)	14840	ENSG00000151692	RNF144A	ring finger protein 144A
chr2	70385219	70385542	*	+ 2 fold & sig. in E2	E2 vs DMSO	1.39808473383132	0.000217994375918313	Distal Intergenic	80191	ENSG00000163235	TGFA	transforming growth factor alpha
chr2	72574920	72575248	*	+ 2 fold & sig. in E2	E2 vs DMSO	1.35426412508463	0.00291036911520491	Intron (ENST00000272427.11/23233, intron 7 of 21)	-59166	ENSG00000144036	EXOC6B	exocyst complex component 6B
chr2	73301694	73301967	*	+ 2 fold & sig. in E2	E2 vs DMSO	2.01281640591132	0.00127620845797795	Distal Intergenic	5923	ENSG00000287435	LOC105374802	uncharacterized LOC105374802
chr2	76269008	76269226	*	+ 2 fold & sig. in E2	E2 vs DMSO	1.25003142311367	0.0131845589935282	Intron (ENST00000669228.1/ENST00000669228.1, intron 1 of 4)	-558023	ENSG00000005436	GCFC2	GC-rich sequence DNA-binding factor 2
chr2	96747150	96747484	*	+ 2 fold & sig. in E2	E2 vs DMSO	1.46824773251292	0.0143887056894715	Distal Intergenic	-7086	ENSG00000114988	LMAN2L	lectin, mannose binding 2 like
chr2	97881529	97881684	*	+ 2 fold & sig. in E2	E2 vs DMSO	2.66214869625669	0.00123084066175214	Intron (ENST00000186436.10/23505, intron 4 of 40)	25562	ENSG00000075568	TMEM131	transmembrane protein 131
chr2	9806260	9806551	*	+ 2 fold & sig. in E2	E2 vs DMSO	2.66496127867688	4.73067871382542e-07	Distal Intergenic	-35919	NA	LOC100996549	uncharacterized LOC100996549
chr2	99574140	99574390	*	+ 2 fold & sig. in E2	E2 vs DMSO	2.33423908315558	0.00499808797771601	Intron (ENST00000409236.6/3899, intron 16 of 22)	18877	ENSG00000144218	AFF3	AF4/FMR2 family member 3
chr20	12544500	12544954	*	+ 2 fold & sig. in E2	E2 vs DMSO	1.81134103976584	0.0399297790572423	Distal Intergenic	-226279	NA	LOC107985406	uncharacterized LOC107985406
chr20	18150388	18150562	*	+ 2 fold & sig. in E2	E2 vs DMSO	1.26913681070034	0.0478667639578459	Intron (ENST00000677174.1/57325, intron 3 of 10)	5289	ENSG00000149474	KAT14	lysine acetyltransferase 14
chr20	19254493	19254758	*	+ 2 fold & sig. in E2	E2 vs DMSO	1.24883492336253	0.00468027731696506	Intron (ENST00000328041.11/57419, intron 1 of 16)	29838	ENSG00000179447	SLC24A3-AS1	SLC24A3 antisense RNA 1
chr20	19284467	19284667	*	+ 2 fold & sig. in E2	E2 vs DMSO	1.2039074270079	0.00135619691016626	Promoter	0	ENSG00000179447	SLC24A3-AS1	SLC24A3 antisense RNA 1
chr20	19290792	19291509	*	+ 2 fold & sig. in E2	E2 vs DMSO	1.90245735361155	1.1049181345289e-06	Intron (ENST00000328041.11/57419, intron 2 of 16)	-6196	ENSG00000179447	SLC24A3-AS1	SLC24A3 antisense RNA 1
chr20	19316308	19316544	*	+ 2 fold & sig. in E2	E2 vs DMSO	2.42280368523819	0.0016739427914788	Intron (ENST00000328041.11/57419, intron 2 of 16)	-31712	ENSG00000179447	SLC24A3-AS1	SLC24A3 antisense RNA 1
chr20	19341498	19341677	*	+ 2 fold & sig. in E2	E2 vs DMSO	1.9076866869581	0.026248237160634	Intron (ENST00000328041.11/57419, intron 2 of 16)	-56902	ENSG00000179447	SLC24A3-AS1	SLC24A3 antisense RNA 1
chr20	19491250	19491632	*	+ 2 fold & sig. in E2	E2 vs DMSO	1.26748810324126	0.0177949210249911	Intron (ENST00000328041.11/57419, intron 2 of 16)	-206654	ENSG00000179447	SLC24A3-AS1	SLC24A3 antisense RNA 1
chr20	19581557	19581900	*	+ 2 fold & sig. in E2	E2 vs DMSO	2.15548781061629	1.96798779074794e-06	Intron (ENST00000328041.11/57419, intron 4 of 16)	-175706	ENSG00000132669	RIN2	Ras and Rab interactor 2
chr20	23361155	23361315	*	+ 2 fold & sig. in E2	E2 vs DMSO	1.70140956037128	9.54358562741763e-05	Promoter	-867	ENSG00000125812	GZF1	GDNF inducible zinc finger protein 1
chr20	24659985	24660232	*	+ 2 fold & sig. in E2	E2 vs DMSO	2.61401486715357	0.00106830213394087	Intron (ENST00000376862.4/79953, intron 3 of 3)	75083	ENSG00000101463	SYNDIG1	synapse differentiation inducing 1
chr20	25146464	25146753	*	+ 2 fold & sig. in E2	E2 vs DMSO	1.22679966555651	0.0318907687866481	Intron (ENST00000667504.1/284798, intron 1 of 3)	711	ENSG00000230725	LOC284798	uncharacterized LOC284798
chr20	25372846	25373187	*	+ 2 fold & sig. in E2	E2 vs DMSO	1.10769085918345	0.0414896273383883	Intron (ENST00000376542.8/26090, intron 1 of 12)	16765	ENSG00000100997	ABHD12	abhydrolase domain containing 12, lysophospholipase
chr20	25418806	25419045	*	+ 2 fold & sig. in E2	E2 vs DMSO	1.3877003331017	0.0358658950945372	Intron (ENST00000696810.1/9837, intron 3 of 5)	1665	ENSG00000101003	GINS1	GINS complex subunit 1
chr20	25525539	25525902	*	+ 2 fold & sig. in E2	E2 vs DMSO	1.41390072611663	0.0175909960043911	Intron (ENST00000278886.11/22981, intron 2 of 23)	7091	ENSG00000101004	NINL	ninein like
chr20	33412479	33412820	*	+ 2 fold & sig. in E2	E2 vs DMSO	2.02350371025388	0.000891225514616584	Exon (ENST00000217381.3/6640, exon 4 of 8)	-10918	ENSG00000101391	CDK5RAP1	CDK5 regulatory subunit associated protein 1
chr20	38059838	38060196	*	+ 2 fold & sig. in E2	E2 vs DMSO	1.43702286524918	0.00473849266186113	Intron (ENST00000462548.6/58490, intron 4 of 5)	-5682	ENSG00000101413	RPRD1B	regulation of nuclear pre-mRNA domain containing 1B
chr20	39524504	39524824	*	+ 2 fold & sig. in E2	E2 vs DMSO	1.48978841934952	0.0123926738602656	Distal Intergenic	138728	NA	LOC102724950	uncharacterized LOC102724950
chr20	4136458	4136931	*	+ 2 fold & sig. in E2	E2 vs DMSO	2.27902414235967	6.16354768481285e-07	Intron (ENST00000493223.1/54498, intron 1 of 1)	-11848	ENSG00000088826	SMOX	spermine oxidase
chr20	48236787	48237012	*	+ 2 fold & sig. in E2	E2 vs DMSO	1.01996427674023	0.0129720909530957	Distal Intergenic	44421	NA	LOC105372641	uncharacterized LOC105372641
chr20	48571544	48571741	*	+ 2 fold & sig. in E2	E2 vs DMSO	1.26589823244706	0.00606188749863119	Distal Intergenic	70997	ENSG00000124126	PREX1	phosphatidylinositol-3,4,5-trisphosphate dependent Rac exchange factor 1
chr20	50068330	50068658	*	+ 2 fold & sig. in E2	E2 vs DMSO	1.50807665094298	0.000130545027423223	Distal Intergenic	-26826	NA	TRERNA1	translation regulatory long non-coding RNA 1
chr20	50076619	50077129	*	+ 2 fold & sig. in E2	E2 vs DMSO	2.02507356784715	1.32835622559839e-05	Distal Intergenic	34437	ENSG00000244687	UBE2V1	ubiquitin conjugating enzyme E2 V1
chr20	50566357	50566539	*	+ 2 fold & sig. in E2	E2 vs DMSO	1.34336872260398	0.0333540858757509	Intron (ENST00000541713.5/5770, intron 2 of 8)	-19247	ENSG00000208018	MIR645	microRNA 645
chr20	50727346	50727931	*	+ 2 fold & sig. in E2	E2 vs DMSO	1.91491302930224	1.00042977004107e-08	Distal Intergenic	-3649	ENSG00000124171	PARD6B	par-6 family cell polarity regulator beta
chr20	51387593	51387982	*	+ 2 fold & sig. in E2	E2 vs DMSO	1.95325269012686	1.24875691728391e-05	3' UTR	11237	ENSG00000101096	NFATC2	nuclear factor of activated T cells 2
chr20	54104179	54104424	*	+ 2 fold & sig. in E2	E2 vs DMSO	1.30697956328958	0.00746569227745706	Distal Intergenic	-33585	ENSG00000064787	BCAS1	brain enriched myelin associated protein 1
chr20	57262983	57263438	*	+ 2 fold & sig. in E2	E2 vs DMSO	1.01937176013103	0.00719167671217624	Intron (ENST00000395863.8/655, intron 1 of 6)	2340	ENSG00000101144	BMP7	bone morphogenetic protein 7
chr20	60113207	60113734	*	+ 2 fold & sig. in E2	E2 vs DMSO	1.41372427087948	0.0440307174338852	Intron (ENST00000654397.1/284757, intron 1 of 6)	-7326	ENSG00000228340	MIR646HG	MIR646 host gene
chr20	64080508	64080782	*	+ 2 fold & sig. in E2	E2 vs DMSO	1.89739794135467	0.000860299665832918	Promoter	312	ENSG00000125510	OPRL1	opioid related nociceptin receptor 1
chr20	753872	754230	*	+ 2 fold & sig. in E2	E2 vs DMSO	1.42535179423437	0.00397579577414679	Distal Intergenic	11595	ENSG00000101276	SLC52A3	solute carrier family 52 member 3
chr20	8346387	8346578	*	+ 2 fold & sig. in E2	E2 vs DMSO	2.01955880184716	0.000852298779281089	Intron (ENST00000637919.1/23236, intron 2 of 32)	-24502	ENSG00000182621	PLCB1	phospholipase C beta 1
chr21	15003423	15003759	*	+ 2 fold & sig. in E2	E2 vs DMSO	2.18837168800148	0.000590532183557014	Intron (ENST00000432230.6/107987295, intron 1 of 3)	-1055	ENSG00000180530	NRIP1	nuclear receptor interacting protein 1
chr21	15005367	15005739	*	+ 2 fold & sig. in E2	E2 vs DMSO	2.31997180998547	0.00010715393545655	Intron (ENST00000432230.6/107987295, intron 1 of 3)	-2999	ENSG00000180530	NRIP1	nuclear receptor interacting protein 1
chr21	15370804	15371254	*	+ 2 fold & sig. in E2	E2 vs DMSO	1.4473430549666	0.000779516622573187	Exon (ENST00000664748.1/101927745, exon 7 of 7)	19459	ENSG00000229425	LOC101927745	uncharacterized LOC101927745
chr21	15586815	15587395	*	+ 2 fold & sig. in E2	E2 vs DMSO	2.87798028702254	2.70435516662719e-07	Intron (ENST00000634644.1/101927745, intron 1 of 11)	39719	ENSG00000229425	LOC105369302	uncharacterized LOC105369302
chr21	15992341	15992559	*	+ 2 fold & sig. in E2	E2 vs DMSO	1.48240951078497	0.0240095525608454	Intron (ENST00000635845.2/388815, intron 1 of 5)	-18906	ENSG00000215386	MIR99AHG	mir-99a-let-7c cluster host gene
chr21	17120445	17120705	*	+ 2 fold & sig. in E2	E2 vs DMSO	1.94572177420522	0.00354856553863946	Distal Intergenic	-318116	NA	LINC01549	long intergenic non-protein coding RNA 1549
chr21	20996456	20997309	*	+ 2 fold & sig. in E2	E2 vs DMSO	1.30751474046836	0.000826030620699538	Distal Intergenic	-1100	ENSG00000154654	NCAM2	neural cell adhesion molecule 2
chr21	21029061	21029584	*	+ 2 fold & sig. in E2	E2 vs DMSO	1.25705827080385	0.00151173083682577	Intron (ENST00000400546.6/4685, intron 1 of 17)	30652	ENSG00000154654	NCAM2	neural cell adhesion molecule 2
chr21	21192675	21193006	*	+ 2 fold & sig. in E2	E2 vs DMSO	1.66318385403643	0.000215486130040274	Intron (ENST00000400546.6/4685, intron 1 of 17)	-46336	ENSG00000154654	NCAM2	neural cell adhesion molecule 2
chr21	28857804	28858089	*	+ 2 fold & sig. in E2	E2 vs DMSO	1.97057462689653	0.000204190822300301	Distal Intergenic	27278	ENSG00000156239	N6AMT1	N-6 adenine-specific DNA methyltransferase 1
chr21	29509176	29509769	*	+ 2 fold & sig. in E2	E2 vs DMSO	1.68747076755965	0.000365603939157423	Intron (ENST00000422809.5/571, intron 2 of 4)	13129	ENSG00000234293	BACH1-IT3	BACH1 intronic transcript 3
chr21	34761839	34762207	*	+ 2 fold & sig. in E2	E2 vs DMSO	1.95182982745528	0.000131712090943436	Intron (ENST00000420877.2/100506385, intron 1 of 2)	16002	ENSG00000234380	LINC01426	long intergenic non-protein coding RNA 1426
chr21	38333628	38333895	*	+ 2 fold & sig. in E2	E2 vs DMSO	1.84631351406754	0.0366168385110747	Promoter	-207	NA	LINC01423	long intergenic non-protein coding RNA 1423
chr21	39985209	39986083	*	+ 2 fold & sig. in E2	E2 vs DMSO	1.5402713641627	0.00711212836280297	Distal Intergenic	86733	ENSG00000183036	PCP4	Purkinje cell protein 4
chr21	40048035	40048297	*	+ 2 fold & sig. in E2	E2 vs DMSO	1.50179729990342	0.0162724526609731	Intron (ENST00000400454.6/1826, intron 30 of 32)	149559	ENSG00000183036	PCP4	Purkinje cell protein 4
chr21	40314090	40314784	*	+ 2 fold & sig. in E2	E2 vs DMSO	1.26275350289727	1.26126107155525e-05	Intron (ENST00000400454.6/1826, intron 8 of 32)	38870	ENSG00000171587	DSCAM	DS cell adhesion molecule
chr21	41699690	41700048	*	+ 2 fold & sig. in E2	E2 vs DMSO	1.50807742986733	0.0022693793759014	Distal Intergenic	14007	ENSG00000236384	LINC00479	long intergenic non-protein coding RNA 479
chr21	42360465	42360724	*	+ 2 fold & sig. in E2	E2 vs DMSO	1.82710053892051	3.55836208473522e-07	Distal Intergenic	5811	ENSG00000160182	TFF1	trefoil factor 1
chr21	42360788	42361028	*	+ 2 fold & sig. in E2	E2 vs DMSO	2.05116526641326	2.88966754994873e-05	Distal Intergenic	5507	ENSG00000160182	TFF1	trefoil factor 1
chr21	42361121	42361557	*	+ 2 fold & sig. in E2	E2 vs DMSO	2.27921654110862	9.76137202997067e-07	Distal Intergenic	4978	ENSG00000160182	TFF1	trefoil factor 1
chr21	42375446	42375847	*	+ 2 fold & sig. in E2	E2 vs DMSO	1.82091863664182	2.62443961391695e-07	Exon (ENST00000433957.7/64699, exon 12 of 13)	6906	ENSG00000160183	TMPRSS3	transmembrane serine protease 3
chr21	42390761	42391004	*	+ 2 fold & sig. in E2	E2 vs DMSO	1.50286128806255	0.010771973968309	Promoter	-343	ENSG00000160183	TMPRSS3	transmembrane serine protease 3
chr21	44176234	44176417	*	+ 2 fold & sig. in E2	E2 vs DMSO	1.36178242299689	0.0434795878689797	Exon (ENST00000411956.1/ENST00000411956.1, exon 2 of 2)	-16158	NA	LINC01678	long intergenic non-protein coding RNA 1678
chr21	45148178	45148446	*	+ 2 fold & sig. in E2	E2 vs DMSO	1.20582547942272	0.00457391280548558	Intron (ENST00000348831.9/104, intron 2 of 10)	-4084	ENSG00000197381	ADARB1	adenosine deaminase RNA specific B1
chr22	19173081	19173589	*	+ 2 fold & sig. in E2	E2 vs DMSO	1.04972422427168	0.0162906648535986	Downstream (<=300bp)	1686	NA	LINC01311	long intergenic non-protein coding RNA 1311
chr22	20514683	20514846	*	+ 2 fold & sig. in E2	E2 vs DMSO	1.8944020996858	0.0146391183368075	Intron (ENST00000445987.5/51586, intron 2 of 5)	6626	ENSG00000099917	MED15	mediator complex subunit 15
chr22	22609463	22609737	*	+ 2 fold & sig. in E2	E2 vs DMSO	1.54145643332772	0.00622811366970348	Distal Intergenic	24112	NA	POM121L1P	POM121 transmembrane nucleoporin like 1, pseudogene
chr22	24352222	24352433	*	+ 2 fold & sig. in E2	E2 vs DMSO	1.70281309737819	0.00617624349597647	Intron (ENST00000437398.5/23384, intron 10 of 15)	47826	ENSG00000258555	SPECC1L-ADORA2A	SPECC1L-ADORA2A readthrough (NMD candidate)
chr22	28823752	28823995	*	+ 2 fold & sig. in E2	E2 vs DMSO	1.4876258351701	9.04253296866077e-06	Intron (ENST00000458080.1/107985549, intron 2 of 3)	23064	NA	LOC107985549	uncharacterized LOC107985549
chr22	29481766	29482032	*	+ 2 fold & sig. in E2	E2 vs DMSO	1.76782101050416	0.000816773138644555	Intron (ENST00000310624.7/4744, intron 1 of 3)	1548	ENSG00000100285	NEFH	neurofilament heavy chain
chr22	39653401	39654040	*	+ 2 fold & sig. in E2	E2 vs DMSO	2.52065570468499	4.05688612895097e-07	Intron (ENST00000407673.5/8911, intron 9 of 34)	10604	ENSG00000100346	CACNA1I	calcium voltage-gated channel subunit alpha1 I
chr22	39663832	39664079	*	+ 2 fold & sig. in E2	E2 vs DMSO	1.8261775518777	0.00146863691185698	Exon (ENST00000407673.5/8911, exon 18 of 35)	21035	ENSG00000100346	CACNA1I	calcium voltage-gated channel subunit alpha1 I
chr22	42173631	42173866	*	+ 2 fold & sig. in E2	E2 vs DMSO	2.45276595512022	8.18644191181935e-05	Intron (ENST00000677622.1/6942, intron 3 of 5)	-24176	NA	CYP2D7	cytochrome P450 family 2 subfamily D member 7 (gene/pseudogene)
chr22	42844817	42845066	*	+ 2 fold & sig. in E2	E2 vs DMSO	1.75310894240752	0.00488714513272337	Intron (ENST00000263245.10/26286, intron 2 of 15)	12173	ENSG00000242247	ARFGAP3	ADP ribosylation factor GTPase activating protein 3
chr22	43919205	43919666	*	+ 2 fold & sig. in E2	E2 vs DMSO	1.48909347724891	0.000413814229754355	Distal Intergenic	-4126	ENSG00000100344	PNPLA3	patatin like phospholipase domain containing 3
chr22	44710678	44710991	*	+ 2 fold & sig. in E2	E2 vs DMSO	1.89239047941949	0.000958202426113948	Intron (ENST00000611394.4/55615, intron 2 of 8)	8158	ENSG00000186654	PRR5	proline rich 5
chr22	47038413	47038783	*	+ 2 fold & sig. in E2	E2 vs DMSO	2.14886107617728	4.51979901460462e-05	Intron (ENST00000380995.5/25771, intron 12 of 13)	78432	NA	NA	NA
chr3	126007964	126008276	*	+ 2 fold & sig. in E2	E2 vs DMSO	1.69629996860754	0.0407849290025744	Intron (ENST00000360370.9/54946, intron 10 of 10)	15488	ENSG00000114544	SLC41A3	solute carrier family 41 member 3
chr3	127208719	127209088	*	+ 2 fold & sig. in E2	E2 vs DMSO	2.53229662784944	1.16000332477375e-06	Intron (ENST00000654542.1/ENST00000654542.1, intron 1 of 1)	15588	ENSG00000214324	C3orf56	chromosome 3 open reading frame 56
chr3	128442115	128442321	*	+ 2 fold & sig. in E2	E2 vs DMSO	1.57551127623816	0.018036692083797	Distal Intergenic	-21273	ENSG00000242049	DNAJB8-AS1	DNAJB8 antisense RNA 1
chr3	134315721	134315998	*	+ 2 fold & sig. in E2	E2 vs DMSO	1.0590685803703	0.0233317850286899	Intron (ENST00000702198.1/105374119, intron 1 of 1)	2145	ENSG00000240006	LINC02004	long intergenic non-protein coding RNA 2004
chr3	134628012	134628167	*	+ 2 fold & sig. in E2	E2 vs DMSO	1.43464199277	0.0340900991669029	Promoter	-9	ENSG00000174611	KY	kyphoscoliosis peptidase
chr3	140980658	140980996	*	+ 2 fold & sig. in E2	E2 vs DMSO	2.34273729094741	6.98080203345363e-05	3' UTR	6992	ENSG00000114120	SLC25A36	solute carrier family 25 member 36
chr3	14204827	14205180	*	+ 2 fold & sig. in E2	E2 vs DMSO	1.61421529902814	0.00187094376741192	Distal Intergenic	26010	ENSG00000170860	LSM3	LSM3 homolog, U6 small nuclear RNA and mRNA degradation associated
chr3	14412854	14413244	*	+ 2 fold & sig. in E2	E2 vs DMSO	2.07706266146058	2.06352938032893e-05	Intron (ENST00000610642.4/6533, intron 1 of 10)	10206	ENSG00000131389	SLC6A6	solute carrier family 6 member 6
chr3	146139950	146140297	*	+ 2 fold & sig. in E2	E2 vs DMSO	2.17467852765501	0.000672108329065123	Intron (ENST00000480704.2/5352, intron 1 of 20)	-15719	ENSG00000152952	PLOD2	procollagen-lysine,2-oxoglutarate 5-dioxygenase 2
chr3	14670962	14671132	*	+ 2 fold & sig. in E2	E2 vs DMSO	1.39710747698393	0.00148389199623883	Exon (ENST00000383794.7/51244, exon 11 of 11)	2960	ENSG00000154781	CCDC174	coiled-coil domain containing 174
chr3	152537614	152538186	*	+ 2 fold & sig. in E2	E2 vs DMSO	1.87984413706566	0.0403580725810068	Distal Intergenic	-40801	NA	LOC105374163	uncharacterized LOC105374163
chr3	15387125	15387535	*	+ 2 fold & sig. in E2	E2 vs DMSO	1.71147840484444	0.00120702534439182	Intron (ENST00000443029.5/131965, intron 6 of 6)	11956	ENSG00000206562	METTL6	methyltransferase 6, methylcytidine
chr3	155219058	155219403	*	+ 2 fold & sig. in E2	E2 vs DMSO	1.56493444898156	0.002787026844366	Distal Intergenic	-21516	ENSG00000241336	LINC01487	long intergenic non-protein coding RNA 1487
chr3	156542361	156542644	*	+ 2 fold & sig. in E2	E2 vs DMSO	3.11113711466357	3.58608261490086e-05	3' UTR	6353	ENSG00000114850	SSR3	signal sequence receptor subunit 3
chr3	156542785	156543063	*	+ 2 fold & sig. in E2	E2 vs DMSO	2.60148092714841	0.00530885417666381	3' UTR	5934	ENSG00000114850	SSR3	signal sequence receptor subunit 3
chr3	157166474	157166924	*	+ 2 fold & sig. in E2	E2 vs DMSO	1.3331097808586	0.000578894669665018	Intron (ENST00000480817.1/ENST00000480817.1, intron 1 of 1)	-5714	ENSG00000163660	CCNL1	cyclin L1
chr3	158725235	158725596	*	+ 2 fold & sig. in E2	E2 vs DMSO	1.01507997262384	0.000583819617638974	Intron (ENST00000237696.10/5918, intron 1 of 5)	-6602	ENSG00000118855	MFSD1	major facilitator superfamily domain containing 1
chr3	161558289	161558636	*	+ 2 fold & sig. in E2	E2 vs DMSO	1.68526392398562	0.00237622431576689	Distal Intergenic	61481	ENSG00000182447	OTOL1	otolin 1
chr3	162946924	162947221	*	+ 2 fold & sig. in E2	E2 vs DMSO	1.38855875641351	0.0438070840429995	Distal Intergenic	331352	ENSG00000241369	LINC01192	long intergenic non-protein coding RNA 1192
chr3	169083922	169084123	*	+ 2 fold & sig. in E2	E2 vs DMSO	1.73239006079141	0.00215527159871463	3' UTR	38549	ENSG00000085276	MECOM	MDS1 and EVI1 complex locus
chr3	169623829	169624419	*	+ 2 fold & sig. in E2	E2 vs DMSO	3.22311756015437	2.38333990083885e-09	Exon (ENST00000469794.1/ENST00000469794.1, exon 1 of 3)	39199	ENSG00000085276	MECOM	MDS1 and EVI1 complex locus
chr3	169758640	169758904	*	+ 2 fold & sig. in E2	E2 vs DMSO	1.11239577987723	0.00651587372730355	Distal Intergenic	6143	ENSG00000277925	TERC	telomerase RNA component
chr3	172551015	172551248	*	+ 2 fold & sig. in E2	E2 vs DMSO	1.72497300636146	0.0333016158890291	Distal Intergenic	-27540	ENSG00000121858	TNFSF10	TNF superfamily member 10
chr3	187917115	187917454	*	+ 2 fold & sig. in E2	E2 vs DMSO	1.9811538525531	6.76288806916512e-06	Distal Intergenic	28767	NA	LOC105374265	uncharacterized LOC105374265
chr3	187928667	187928979	*	+ 2 fold & sig. in E2	E2 vs DMSO	1.34614764688517	0.0136211219649335	Distal Intergenic	17242	NA	LOC105374265	uncharacterized LOC105374265
chr3	189173678	189173975	*	+ 2 fold & sig. in E2	E2 vs DMSO	2.18523128917267	0.000124721972734372	Intron (ENST00000433971.5/285386, intron 6 of 10)	1707	ENSG00000188001	TPRG1	tumor protein p63 regulated 1
chr3	189563821	189564428	*	+ 2 fold & sig. in E2	E2 vs DMSO	1.4839068346292	0.00981328517881674	Distal Intergenic	-66961	ENSG00000073282	TP63	tumor protein p63
chr3	189842525	189843521	*	+ 2 fold & sig. in E2	E2 vs DMSO	1.46330482102171	1.40907983455247e-05	Intron (ENST00000264731.8/8626, intron 4 of 13)	12603	ENSG00000216058	MIR944	microRNA 944
chr3	193836980	193837273	*	+ 2 fold & sig. in E2	E2 vs DMSO	2.25185963951105	0.000839148613100037	Distal Intergenic	6736	NA	LINC02038	long intergenic non-protein coding RNA 2038
chr3	194243248	194243469	*	+ 2 fold & sig. in E2	E2 vs DMSO	1.26565060332202	0.0434185860852626	Intron (ENST00000667386.1/100505920, intron 1 of 2)	-4148	ENSG00000238097	LINC02037	long intergenic non-protein coding RNA 2037
chr3	194804719	194805021	*	+ 2 fold & sig. in E2	E2 vs DMSO	1.22626843235452	0.0416117974435237	Intron (ENST00000668747.1/100507391, intron 7 of 7)	35296	ENSG00000237222	LINC01968	long intergenic non-protein coding RNA 1968
chr3	197532426	197532743	*	+ 2 fold & sig. in E2	E2 vs DMSO	1.43275839929649	0.0141310782491589	5' UTR	897	ENSG00000161267	BDH1	3-hydroxybutyrate dehydrogenase 1
chr3	37179205	37179521	*	+ 2 fold & sig. in E2	E2 vs DMSO	1.95545678059134	6.96813466978343e-06	Intron (ENST00000702636.1/105377642, intron 1 of 3)	-2673	ENSG00000093167	LRRFIP2	LRR binding FLII interacting protein 2
chr3	37235042	37235281	*	+ 2 fold & sig. in E2	E2 vs DMSO	1.3660980347549	0.0194286667158892	Distal Intergenic	-7910	ENSG00000144674	GOLGA4	golgin A4
chr3	42855950	42856131	*	+ 2 fold & sig. in E2	E2 vs DMSO	1.78217788910742	0.00727466485318059	Promoter	0	ENSG00000144648	ACKR2	atypical chemokine receptor 2
chr3	48425147	48425366	*	+ 2 fold & sig. in E2	E2 vs DMSO	1.74795252670084	0.00156523884249099	Promoter	-536	ENSG00000164050	PLXNB1	plexin B1
chr3	49418793	49419057	*	+ 2 fold & sig. in E2	E2 vs DMSO	1.42709030271298	0.0193474704842688	Promoter	0	ENSG00000145020	AMT	aminomethyltransferase
chr3	50278046	50278503	*	+ 2 fold & sig. in E2	E2 vs DMSO	1.46892471949875	6.5048335464188e-05	Promoter	-584	ENSG00000179564	LSMEM2	leucine rich single-pass membrane protein 2
chr3	50285864	50286072	*	+ 2 fold & sig. in E2	E2 vs DMSO	2.1383143697456	0.000200986566617809	Intron (ENST00000316436.4/132228, intron 1 of 3)	2567	ENSG00000214706	IFRD2	interferon related developmental regulator 2
chr3	52432758	52433127	*	+ 2 fold & sig. in E2	E2 vs DMSO	1.64272984388054	0.00022392842249733	3' UTR	11742	ENSG00000010318	PHF7	PHD finger protein 7
chr3	57733787	57734121	*	+ 2 fold & sig. in E2	E2 vs DMSO	1.45528026942491	0.00705850122586523	Distal Intergenic	-21329	ENSG00000163681	SLMAP	sarcolemma associated protein
chr3	58467227	58467518	*	+ 2 fold & sig. in E2	E2 vs DMSO	1.2736365330501	0.00107329738008706	Distal Intergenic	-24578	ENSG00000168301	KCTD6	potassium channel tetramerization domain containing 6
chr3	59026492	59026789	*	+ 2 fold & sig. in E2	E2 vs DMSO	1.45097439975735	0.0106325492163817	Intron (ENST00000295966.11/200844, intron 4 of 15)	19522	ENSG00000163689	CFAP20DC	CFAP20 domain containing
chr3	61707955	61708647	*	+ 2 fold & sig. in E2	E2 vs DMSO	1.86345237980349	7.21562696810317e-06	Intron (ENST00000495879.1/5793, intron 1 of 2)	146044	ENSG00000144724	PTPRG	protein tyrosine phosphatase receptor type G
chr3	64491538	64491715	*	+ 2 fold & sig. in E2	E2 vs DMSO	1.15858685039794	0.000214971188190601	Distal Intergenic	30796	ENSG00000163638	ADAMTS9	ADAM metallopeptidase with thrombospondin type 1 motif 9
chr3	65717745	65718337	*	+ 2 fold & sig. in E2	E2 vs DMSO	2.05228885815185	0.000103254652225412	Intron (ENST00000330909.12/9223, intron 1 of 24)	-95655	ENSG00000151276	MAGI1	membrane associated guanylate kinase, WW and PDZ domain containing 1
chr3	65797236	65797452	*	+ 2 fold & sig. in E2	E2 vs DMSO	1.57017083779176	0.0199900464203248	Intron (ENST00000330909.12/9223, intron 1 of 24)	-96364	ENSG00000240175	MAGI1-AS1	MAGI1 antisense RNA 1
chr3	66415998	66416454	*	+ 2 fold & sig. in E2	E2 vs DMSO	1.91430900171302	0.000273178840259029	Intron (ENST00000383703.3/26018, intron 4 of 19)	1178	ENSG00000144749	LRIG1	leucine rich repeats and immunoglobulin like domains 1
chr3	66483386	66483782	*	+ 2 fold & sig. in E2	E2 vs DMSO	1.52413298324368	0.0454704690305274	Intron (ENST00000383703.3/26018, intron 1 of 19)	-14141	ENSG00000144749	LRIG1	leucine rich repeats and immunoglobulin like domains 1
chr3	73666579	73667017	*	+ 2 fold & sig. in E2	E2 vs DMSO	1.19582875832724	0.0147365448383441	Distal Intergenic	-41638	ENSG00000121440	PDZRN3	PDZ domain containing ring finger 3
chr3	8318049	8318375	*	+ 2 fold & sig. in E2	E2 vs DMSO	1.36486565034641	0.0133935450814569	Intron (ENST00000654635.1/101927394, intron 3 of 6)	47864	NA	LOC107986010	uncharacterized LOC107986010
chr3	97936001	97936215	*	+ 2 fold & sig. in E2	E2 vs DMSO	1.35748632895323	0.0454603748703443	Intron (ENST00000389622.7/131544, intron 18 of 21)	11186	ENSG00000170854	RIOX2	ribosomal oxygenase 2
chr3	98502332	98502638	*	+ 2 fold & sig. in E2	E2 vs DMSO	1.5322616063934	0.0477966418985153	Intron (ENST00000502288.5/56650, intron 3 of 3)	4651	ENSG00000231861	OR5K2	olfactory receptor family 5 subfamily K member 2
chr4	102735600	102735914	*	+ 2 fold & sig. in E2	E2 vs DMSO	1.0490022339073	0.0167854567648824	Intron (ENST00000647097.2/4126, intron 1 of 16)	-6994	ENSG00000109323	MANBA	mannosidase beta
chr4	10664460	10664910	*	+ 2 fold & sig. in E2	E2 vs DMSO	1.76611074749761	0.000230453709702682	Intron (ENST00000226951.11/116449, intron 2 of 18)	-7899	ENSG00000109684	CLNK	cytokine dependent hematopoietic cell linker
chr4	108715222	108715635	*	+ 2 fold & sig. in E2	E2 vs DMSO	1.42182137111105	0.0288381322550062	Distal Intergenic	35371	ENSG00000164089	ETNPPL	ethanolamine-phosphate phospho-lyase
chr4	112283313	112283572	*	+ 2 fold & sig. in E2	E2 vs DMSO	1.42432055889553	0.0147343846999537	Intron (ENST00000610220.2/92610, intron 1 of 1)	-1540	ENSG00000145365	TIFA	TRAF interacting protein with forkhead associated domain
chr4	1245364	1245820	*	+ 2 fold & sig. in E2	E2 vs DMSO	2.23141269960397	2.94542502892512e-05	Intron (ENST00000382952.8/1487, intron 1 of 9)	565	ENSG00000159692	CTBP1	C-terminal binding protein 1
chr4	125131906	125132359	*	+ 2 fold & sig. in E2	E2 vs DMSO	2.45527470702857	5.08732706136706e-06	Distal Intergenic	-182559	ENSG00000196159	FAT4	FAT atypical cadherin 4
chr4	140250063	140250656	*	+ 2 fold & sig. in E2	E2 vs DMSO	2.74857842857416	1.54832481805222e-07	Distal Intergenic	-6630	ENSG00000153130	SCOC	short coiled-coil protein
chr4	142408241	142408508	*	+ 2 fold & sig. in E2	E2 vs DMSO	1.80349877211741	0.00133718725735981	Intron (ENST00000513000.5/8821, intron 6 of 26)	-2981	ENSG00000109452	INPP4B	inositol polyphosphate-4-phosphatase type II B
chr4	143036473	143036703	*	+ 2 fold & sig. in E2	E2 vs DMSO	1.78482484455973	0.000866588435794432	Intron (ENST00000507826.1/105377623, intron 1 of 2)	147986	ENSG00000250326	LOC105377623	uncharacterized LOC105377623
chr4	152928635	152928843	*	+ 2 fold & sig. in E2	E2 vs DMSO	1.3194788799376	0.0337523509695269	Distal Intergenic	-7480	ENSG00000137460	FHDC1	FH2 domain containing 1
chr4	165583395	165583601	*	+ 2 fold & sig. in E2	E2 vs DMSO	1.45065353162927	0.025222778987215	Distal Intergenic	-101038	ENSG00000249500	LINC01179	long intergenic non-protein coding RNA 1179
chr4	168691634	168691961	*	+ 2 fold & sig. in E2	E2 vs DMSO	2.04252611886864	0.00119145546120861	Intron (ENST00000505667.6/23022, intron 8 of 21)	-19620	ENSG00000129116	PALLD	palladin, cytoskeletal associated protein
chr4	1825958	1826351	*	+ 2 fold & sig. in E2	E2 vs DMSO	1.38869449791378	0.0239260417044834	Intron (ENST00000302787.3/3954, intron 6 of 13)	-3316	ENSG00000168924	LETM1	leucine zipper and EF-hand containing transmembrane protein 1
chr4	183619468	183619741	*	+ 2 fold & sig. in E2	E2 vs DMSO	1.37414994190874	0.0189535961266939	Distal Intergenic	36355	ENSG00000182552	RWDD4	RWD domain containing 4
chr4	185510853	185511008	*	+ 2 fold & sig. in E2	E2 vs DMSO	2.56108904887583	0.000459823186671297	Intron (ENST00000284767.12/27295, intron 4 of 7)	-3766	ENSG00000154553	PDLIM3	PDZ and LIM domain 3
chr4	23374305	23374648	*	+ 2 fold & sig. in E2	E2 vs DMSO	1.42860500036118	0.00315678009680296	Distal Intergenic	-186275	NA	LOC105374528	uncharacterized LOC105374528
chr4	2419289	2419740	*	+ 2 fold & sig. in E2	E2 vs DMSO	1.64074913645661	0.00010068897150917	Promoter	315	ENSG00000206113	CFAP99	cilia and flagella associated protein 99
chr4	24482266	24482592	*	+ 2 fold & sig. in E2	E2 vs DMSO	1.3444775368683	0.00356435812410936	Distal Intergenic	-9315	ENSG00000109819	PPARGC1A	PPARG coactivator 1 alpha
chr4	2512756	2512979	*	+ 2 fold & sig. in E2	E2 vs DMSO	1.51449394345385	0.0219519281901728	Promoter	279	ENSG00000125386	FAM193A	family with sequence similarity 193 member A
chr4	27169017	27169322	*	+ 2 fold & sig. in E2	E2 vs DMSO	2.0735985071594	0.0110815517043441	Distal Intergenic	-48157	ENSG00000249699	LINC02261	long intergenic non-protein coding RNA 2261
chr4	27620878	27621225	*	+ 2 fold & sig. in E2	E2 vs DMSO	1.42570398708629	0.00712500398196119	Distal Intergenic	-296528	NA	LOC105374552	uncharacterized LOC105374552
chr4	33104288	33104605	*	+ 2 fold & sig. in E2	E2 vs DMSO	1.45852417860883	0.0109195580672359	Distal Intergenic	-362793	NA	LOC105374391	uncharacterized LOC105374391
chr4	3364220	3364609	*	+ 2 fold & sig. in E2	E2 vs DMSO	1.85404243832452	0.00849219669513614	Intron (ENST00000336727.8/6002, intron 3 of 17)	-5270	ENSG00000159788	RGS12	regulator of G protein signaling 12
chr4	3686803	3687156	*	+ 2 fold & sig. in E2	E2 vs DMSO	1.97899109890727	2.00692719536099e-05	Distal Intergenic	-8948	ENSG00000250632	LINC02171	long intergenic non-protein coding RNA 2171
chr4	38523066	38523377	*	+ 2 fold & sig. in E2	E2 vs DMSO	1.41203421238948	0.0245672232516331	Promoter	0	ENSG00000249534	LINC01258	long intergenic non-protein coding RNA 1258
chr4	39706968	39707349	*	+ 2 fold & sig. in E2	E2 vs DMSO	1.75450047779779	0.00118048112990517	Intron (ENST00000510934.5/3093, intron 1 of 4)	8640	ENSG00000078140	UBE2K	ubiquitin conjugating enzyme E2 K
chr4	40548278	40548793	*	+ 2 fold & sig. in E2	E2 vs DMSO	2.53290490927074	8.89179791858931e-08	Intron (ENST00000295971.12/54502, intron 1 of 6)	-32305	ENSG00000163694	RBM47	RNA binding motif protein 47
chr4	41505166	41505410	*	+ 2 fold & sig. in E2	E2 vs DMSO	1.50522825811375	0.00341901664650672	Intron (ENST00000513024.5/22998, intron 2 of 25)	-32747	ENSG00000064042	LIMCH1	LIM and calponin homology domains 1
chr4	55947182	55947645	*	+ 2 fold & sig. in E2	E2 vs DMSO	1.43896020896138	0.000531943504508136	Promoter	351	ENSG00000287382	LOC105377663	uncharacterized LOC105377663
chr4	56477291	56477508	*	+ 2 fold & sig. in E2	E2 vs DMSO	2.05297236754873	0.000985550443786508	Intron (ENST00000510663.6/6731, intron 6 of 16)	-8720	ENSG00000174780	SRP72	signal recognition particle 72
chr4	60938715	60938985	*	+ 2 fold & sig. in E2	E2 vs DMSO	2.44700760845416	5.35456007839541e-05	Distal Intergenic	16096	ENSG00000265829	MIR548AG1	microRNA 548ag-1
chr4	788999	789330	*	+ 2 fold & sig. in E2	E2 vs DMSO	1.62561546123396	0.00151179374817893	Promoter	0	NA	LOC105374339	uncharacterized LOC105374339
chr4	827708	828104	*	+ 2 fold & sig. in E2	E2 vs DMSO	1.58736266634912	0.0244487191864659	Distal Intergenic	-1579	ENSG00000168993	CPLX1	complexin 1
chr4	83651586	83651997	*	+ 2 fold & sig. in E2	E2 vs DMSO	1.70055228708761	9.38848144428612e-05	Distal Intergenic	53057	ENSG00000138678	GPAT3	glycerol-3-phosphate acyltransferase 3
chr4	997877	998466	*	+ 2 fold & sig. in E2	E2 vs DMSO	1.56040317786625	0.00041551402142007	Intron (ENST00000247933.9/3425, intron 2 of 13)	-1244	ENSG00000127415	IDUA	alpha-L-iduronidase
chr5	103271931	103272190	*	+ 2 fold & sig. in E2	E2 vs DMSO	1.07637767230279	0.0330470374791489	Intron (ENST00000319933.7/90355, intron 2 of 2)	12507	ENSG00000181751	MACIR	macrophage immunometabolism regulator
chr5	104385989	104386220	*	+ 2 fold & sig. in E2	E2 vs DMSO	1.17269422563037	0.0317760183641433	Intron (ENST00000666145.1/107986389, intron 4 of 4)	306070	NA	LINC02163	long intergenic non-protein coding RNA 2163
chr5	12109470	12109638	*	+ 2 fold & sig. in E2	E2 vs DMSO	1.28797486977523	0.0403704855211557	Distal Intergenic	-205024	ENSG00000169862	CTNND2	catenin delta 2
chr5	122849268	122849522	*	+ 2 fold & sig. in E2	E2 vs DMSO	1.89493974798233	3.28887395865978e-05	Intron (ENST00000513613.5/28966, intron 1 of 4)	3605	ENSG00000064652	SNX24	sorting nexin 24
chr5	122869246	122869584	*	+ 2 fold & sig. in E2	E2 vs DMSO	1.98059116883665	0.00105321920538095	Intron (ENST00000513613.5/28966, intron 1 of 4)	23583	ENSG00000064652	SNX24	sorting nexin 24
chr5	12497306	12497531	*	+ 2 fold & sig. in E2	E2 vs DMSO	1.37140367267216	0.0318694606963038	Distal Intergenic	77106	NA	LOC105374655	uncharacterized LOC105374655
chr5	12841041	12841340	*	+ 2 fold & sig. in E2	E2 vs DMSO	1.25215261154065	0.0263321709208355	Distal Intergenic	191546	NA	LINC02220	long intergenic non-protein coding RNA 2220
chr5	132488661	132488943	*	+ 2 fold & sig. in E2	E2 vs DMSO	1.10068632319758	0.007615195912964	Promoter	89	ENSG00000125347	IRF1	interferon regulatory factor 1
chr5	132971826	132972396	*	+ 2 fold & sig. in E2	E2 vs DMSO	1.9889834470797	1.19795087389758e-05	Distal Intergenic	-8192	ENSG00000072364	AFF4	AF4/FMR2 family member 4
chr5	133265250	133265545	*	+ 2 fold & sig. in E2	E2 vs DMSO	1.11818152512565	0.0189608858994544	Intron (ENST00000508950.5/124901067, intron 1 of 1)	-1040	NA	NA	NA
chr5	134920133	134920590	*	+ 2 fold & sig. in E2	E2 vs DMSO	1.22785849986609	0.046081615765822	Intron (ENST00000512783.5/84105, intron 2 of 4)	11303	ENSG00000132570	PCBD2	pterin-4 alpha-carbinolamine dehydratase 2
chr5	135296879	135297445	*	+ 2 fold & sig. in E2	E2 vs DMSO	2.2344109935134	0.000518833151105348	Intron (ENST00000624272.3/100996485, intron 3 of 5)	-40494	ENSG00000224186	PITX1-AS1	PITX1 antisense RNA 1
chr5	135722711	135723050	*	+ 2 fold & sig. in E2	E2 vs DMSO	1.55510952085918	0.0157817582726333	Intron (ENST00000698885.1/153328, intron 2 of 3)	-68776	ENSG00000251045	SLC25A48-AS1	SLC25A48 antisense RNA 1
chr5	137815571	137815904	*	+ 2 fold & sig. in E2	E2 vs DMSO	1.65174982297455	0.0146144128684323	Intron (ENST00000661977.1/101928005, intron 3 of 3)	14344	ENSG00000226306	NPY6R	neuropeptide Y receptor Y6 (pseudogene)
chr5	139707729	139707994	*	+ 2 fold & sig. in E2	E2 vs DMSO	1.41323430277686	0.00021207674443704	Intron (ENST00000515296.1/84249, intron 2 of 5)	23084	ENSG00000146005	PSD2	pleckstrin and Sec7 domain containing 2
chr5	142857334	142857672	*	+ 2 fold & sig. in E2	E2 vs DMSO	1.3649409760207	0.00669153460705456	Intron (ENST00000645722.2/23092, intron 1 of 22)	11238	ENSG00000226272	ARHGAP26-AS1	ARHGAP26 antisense RNA 1
chr5	14394552	14394730	*	+ 2 fold & sig. in E2	E2 vs DMSO	1.48853597640597	0.0268859078580037	Intron (ENST00000698541.1/7204, intron 28 of 36)	-4294	ENSG00000038382	TRIO	trio Rho guanine nucleotide exchange factor
chr5	144104200	144104428	*	+ 2 fold & sig. in E2	E2 vs DMSO	1.71151844264981	0.00558042929511316	Distal Intergenic	66202	ENSG00000145817	YIPF5	Yip1 domain family member 5
chr5	145912555	145912917	*	+ 2 fold & sig. in E2	E2 vs DMSO	1.61193980189025	0.00751049865665846	Intron (ENST00000639411.1/643226, intron 2 of 3)	-23661	ENSG00000156463	SH3RF2	SH3 domain containing ring finger 2
chr5	146032518	146032733	*	+ 2 fold & sig. in E2	E2 vs DMSO	2.08340762008364	3.05134250199527e-05	Intron (ENST00000359120.9/153769, intron 5 of 9)	-10297	ENSG00000156463	SH3RF2	SH3 domain containing ring finger 2
chr5	1537247	1537497	*	+ 2 fold & sig. in E2	E2 vs DMSO	1.44844196672892	0.00636471857026672	Distal Intergenic	-13285	ENSG00000153395	LPCAT1	lysophosphatidylcholine acyltransferase 1
chr5	160240346	160240594	*	+ 2 fold & sig. in E2	E2 vs DMSO	1.25468764839147	0.00460069135834194	Distal Intergenic	8311	ENSG00000170231	FABP6	fatty acid binding protein 6
chr5	169009221	169009561	*	+ 2 fold & sig. in E2	E2 vs DMSO	1.3999269937201	0.0315539202739185	Intron (ENST00000519560.6/6586, intron 4 of 35)	-3666	NA	SLIT3-AS1	SLIT3 antisense RNA 1
chr5	169099692	169099984	*	+ 2 fold & sig. in E2	E2 vs DMSO	1.42948354550938	0.00712495043871945	Intron (ENST00000519560.6/6586, intron 4 of 35)	69254	NA	SLIT3-AS1	SLIT3 antisense RNA 1
chr5	173291977	173292408	*	+ 2 fold & sig. in E2	E2 vs DMSO	1.73979975731299	2.05874865304433e-05	Distal Intergenic	31878	ENSG00000113739	STC2	stanniocalcin 2
chr5	173314224	173314916	*	+ 2 fold & sig. in E2	E2 vs DMSO	1.79703481347096	1.42636532105556e-05	3' UTR	9370	ENSG00000113739	STC2	stanniocalcin 2
chr5	177347290	177347567	*	+ 2 fold & sig. in E2	E2 vs DMSO	1.32231772262238	0.0044241841864325	Intron (ENST00000694903.1/10960, intron 2 of 7)	3955	ENSG00000169223	LMAN2	lectin, mannose binding 2
chr5	178116434	178116710	*	+ 2 fold & sig. in E2	E2 vs DMSO	1.30193560704667	0.000655813054067266	Intron (ENST00000274605.6/23138, intron 1 of 4)	2902	ENSG00000145911	N4BP3	NEDD4 binding protein 3
chr5	178213069	178213327	*	+ 2 fold & sig. in E2	E2 vs DMSO	1.08716135742113	0.00419273383906555	3' UTR	7501	ENSG00000197451	HNRNPAB	heterogeneous nuclear ribonucleoprotein A/B
chr5	19885178	19885410	*	+ 2 fold & sig. in E2	E2 vs DMSO	1.12889146248909	0.0130799273490563	Intron (ENST00000382275.6/1016, intron 2 of 12)	862	ENSG00000145526	CDH18	cadherin 18
chr5	20501994	20502419	*	+ 2 fold & sig. in E2	E2 vs DMSO	1.19512424227824	0.00294013873762965	Intron (ENST00000507958.5/1016, intron 1 of 14)	73444	ENSG00000145526	CDH18	cadherin 18
chr5	21200984	21201373	*	+ 2 fold & sig. in E2	E2 vs DMSO	1.23838083763326	0.0413093094300945	Distal Intergenic	139917	NA	NA	NA
chr5	21576185	21576472	*	+ 2 fold & sig. in E2	E2 vs DMSO	1.0263926262728	0.0444642490201286	Intron (ENST00000607545.5/728411, intron 4 of 4)	-39790	NA	LOC105374685	uncharacterized LOC105374685
chr5	21665459	21665712	*	+ 2 fold & sig. in E2	E2 vs DMSO	1.48893869671501	0.0358583998070293	Intron (ENST00000522350.1/105374685, intron 2 of 3)	49197	NA	LOC105374685	uncharacterized LOC105374685
chr5	33614093	33614613	*	+ 2 fold & sig. in E2	E2 vs DMSO	1.59386114138696	0.00377426873517484	Exon (ENST00000504830.6/81792, exon 16 of 24)	9738	ENSG00000151388	ADAMTS12	ADAM metallopeptidase with thrombospondin type 1 motif 12
chr5	34608886	34609139	*	+ 2 fold & sig. in E2	E2 vs DMSO	1.25454782600318	0.0352733647559951	Distal Intergenic	-47189	ENSG00000039560	RAI14	retinoic acid induced 14
chr5	35476721	35476931	*	+ 2 fold & sig. in E2	E2 vs DMSO	1.29501606900829	0.0426009858235765	Distal Intergenic	47657	NA	NA	NA
chr5	43416692	43417061	*	+ 2 fold & sig. in E2	E2 vs DMSO	1.62099345051448	0.00623537895569531	Distal Intergenic	-4301	ENSG00000151882	CCL28	C-C motif chemokine ligand 28
chr5	43470384	43470610	*	+ 2 fold & sig. in E2	E2 vs DMSO	2.21708185831167	0.00885749728060412	Intron (ENST00000500337.6/64417, intron 3 of 4)	13226	ENSG00000151881	TMEM267	transmembrane protein 267
chr5	55961797	55962020	*	+ 2 fold & sig. in E2	E2 vs DMSO	1.73674842240535	0.00165002316226395	Intron (ENST00000381298.7/3572, intron 7 of 16)	-10160	ENSG00000134352	IL6ST	interleukin 6 cytokine family signal transducer
chr5	56069127	56069385	*	+ 2 fold & sig. in E2	E2 vs DMSO	1.71351400181679	0.0391965546455086	Intron (ENST00000645512.1/ENST00000645512.1, intron 2 of 3)	10077	NA	LOC105378976	uncharacterized LOC105378976
chr5	56610378	56610702	*	+ 2 fold & sig. in E2	E2 vs DMSO	1.09641000825035	0.0423871476571672	Distal Intergenic	-4146	NA	C5orf67	chromosome 5 putative open reading frame 67
chr5	56658894	56659348	*	+ 2 fold & sig. in E2	E2 vs DMSO	1.50867764082832	0.00807203075142835	Distal Intergenic	-52662	NA	C5orf67	chromosome 5 putative open reading frame 67
chr5	58095297	58095711	*	+ 2 fold & sig. in E2	E2 vs DMSO	1.72481896576124	3.18991000149694e-05	Distal Intergenic	17621	ENSG00000248132	LINC02101	long intergenic non-protein coding RNA 2101
chr5	62333937	62334416	*	+ 2 fold & sig. in E2	E2 vs DMSO	1.78841887467223	0.0272711444326456	Intron (ENST00000401507.7/3796, intron 1 of 19)	-12731	ENSG00000068796	KIF2A	kinesin family member 2A
chr5	66861500	66861741	*	+ 2 fold & sig. in E2	E2 vs DMSO	1.66651294849264	0.00125044919869723	Intron (ENST00000406374.5/375449, intron 3 of 5)	32638	ENSG00000069020	MAST4	microtubule associated serine/threonine kinase family member 4
chr5	67229700	67229945	*	+ 2 fold & sig. in E2	E2 vs DMSO	1.2363505364788	0.0138134103754288	Distal Intergenic	-32901	ENSG00000134061	CD180	CD180 molecule
chr5	69033750	69034013	*	+ 2 fold & sig. in E2	E2 vs DMSO	1.43751091633187	0.00648311542204858	Intron (ENST00000696797.1/107984116, intron 2 of 4)	-3585	NA	LINC02198	long intergenic non-protein coding RNA 2198
chr5	77757691	77757890	*	+ 2 fold & sig. in E2	E2 vs DMSO	1.9102618079804	0.00716670611367046	Intron (ENST00000380377.9/6902, intron 1 of 3)	18371	ENSG00000171530	TBCA	tubulin folding cofactor A
chr5	83387077	83387388	*	+ 2 fold & sig. in E2	E2 vs DMSO	1.79759501150562	0.000312942644913441	Distal Intergenic	-84230	ENSG00000038427	VCAN	versican
chr5	9169353	9169777	*	+ 2 fold & sig. in E2	E2 vs DMSO	1.05754659646784	0.048639528041768	Intron (ENST00000382496.10/9037, intron 11 of 22)	95768	ENSG00000112902	SEMA5A	semaphorin 5A
chr5	92991761	92992020	*	+ 2 fold & sig. in E2	E2 vs DMSO	1.25617757789379	0.0390884711264084	Distal Intergenic	-52170	NA	LINC02058	long intergenic non-protein coding RNA 2058
chr5	95728618	95729027	*	+ 2 fold & sig. in E2	E2 vs DMSO	2.04131393729303	6.97578583104613e-06	Intron (ENST00000515852.5/22836, intron 2 of 2)	-1845	ENSG00000164292	RHOBTB3	Rho related BTB domain containing 3
chr5	9829628	9829840	*	+ 2 fold & sig. in E2	E2 vs DMSO	1.27127115453333	0.0353823276356318	Intron (ENST00000511616.5/285692, intron 4 of 12)	-24531	NA	LINC02221	long intergenic non-protein coding RNA 2221
chr6	10859017	10859345	*	+ 2 fold & sig. in E2	E2 vs DMSO	1.6524611910739	0.000368806149919475	Intron (ENST00000480294.1/221711, intron 3 of 18)	-20464	ENSG00000111837	MAK	male germ cell associated kinase
chr6	108677325	108677533	*	+ 2 fold & sig. in E2	E2 vs DMSO	1.5361464345485	0.016864636391435	Intron (ENST00000343882.10/2309, intron 3 of 3)	20979	ENSG00000118689	FOXO3	forkhead box O3
chr6	108735426	108735649	*	+ 2 fold & sig. in E2	E2 vs DMSO	1.73890485645457	9.52585116678638e-06	Distal Intergenic	-16005	ENSG00000203801	LINC00222	long intergenic non-protein coding RNA 222
chr6	109927173	109927419	*	+ 2 fold & sig. in E2	E2 vs DMSO	1.22829775195301	0.0434208695511189	Distal Intergenic	-50837	ENSG00000146360	GPR6	G protein-coupled receptor 6
chr6	110557343	110557617	*	+ 2 fold & sig. in E2	E2 vs DMSO	2.6427283861837	0.000114703357250733	Intron (ENST00000700989.1/105377940, intron 1 of 5)	8990	NA	LOC105377940	uncharacterized LOC105377940
chr6	116047585	116047819	*	+ 2 fold & sig. in E2	E2 vs DMSO	1.18819149661515	0.032246583596596	Intron (ENST00000692859.2/2444, intron 1 of 1)	8829	NA	TPI1P3	triosephosphate isomerase 1 pseudogene 3
chr6	125197799	125198303	*	+ 2 fold & sig. in E2	E2 vs DMSO	2.00776495372812	7.94103596316659e-08	Intron (ENST00000534368.5/7164, intron 1 of 3)	-5336	ENSG00000111907	TPD52L1	TPD52 like 1
chr6	125205086	125205536	*	+ 2 fold & sig. in E2	E2 vs DMSO	2.1565017324473	8.12149233408072e-08	Intron (ENST00000534368.5/7164, intron 1 of 3)	1447	ENSG00000111907	TPD52L1	TPD52 like 1
chr6	125267859	125268120	*	+ 2 fold & sig. in E2	E2 vs DMSO	1.71536903659009	0.00202518932795708	Promoter	0	NA	NA	NA
chr6	125307499	125307716	*	+ 2 fold & sig. in E2	E2 vs DMSO	1.09719386086657	0.0224425060706	Distal Intergenic	-5421	ENSG00000111906	HDDC2	HD domain containing 2
chr6	125585513	125585761	*	+ 2 fold & sig. in E2	E2 vs DMSO	2.59695996925414	6.9251778719483e-06	Intron (ENST00000656901.1/105377986, intron 3 of 3)	-88592	ENSG00000224506	LINC02523	long intergenic non-protein coding RNA 2523
chr6	130034647	130034995	*	+ 2 fold & sig. in E2	E2 vs DMSO	1.75618538797929	0.000380962452745019	Intron (ENST00000674039.1/84456, intron 4 of 4)	14090	ENSG00000198945	L3MBTL3	L3MBTL histone methyl-lysine binding protein 3
chr6	134162938	134163255	*	+ 2 fold & sig. in E2	E2 vs DMSO	1.52132396239663	0.00875995868114348	Distal Intergenic	8879	ENSG00000118515	SGK1	serum/glucocorticoid regulated kinase 1
chr6	134827119	134827431	*	+ 2 fold & sig. in E2	E2 vs DMSO	1.58972204592109	0.00111003324547311	Distal Intergenic	101730	ENSG00000118514	ALDH8A1	aldehyde dehydrogenase 8 family member A1
chr6	136180569	136180960	*	+ 2 fold & sig. in E2	E2 vs DMSO	1.33490909127749	0.0414896273383883	Intron (ENST00000308191.11/27115, intron 10 of 12)	31483	ENSG00000171408	PDE7B	phosphodiesterase 7B
chr6	140497324	140497713	*	+ 2 fold & sig. in E2	E2 vs DMSO	2.53991221572801	0.00108470618155997	Intron (ENST00000684511.1/105378027, intron 1 of 8)	-138667	NA	LOC105378027	uncharacterized LOC105378027
chr6	147195671	147195921	*	+ 2 fold & sig. in E2	E2 vs DMSO	1.24986544979135	0.0343825911972169	Intron (ENST00000657809.1/729178, intron 1 of 12)	6546	ENSG00000233452	STXBP5-AS1	STXBP5 antisense RNA 1
chr6	14950275	14950567	*	+ 2 fold & sig. in E2	E2 vs DMSO	1.21628396861973	0.0102082183998814	Intron (ENST00000629853.2/105374945, intron 2 of 3)	58445	NA	LOC105374945	uncharacterized LOC105374945
chr6	150835690	150835911	*	+ 2 fold & sig. in E2	E2 vs DMSO	1.36619918069152	0.0146144128684323	Intron (ENST00000696526.1/57480, intron 16 of 16)	-29768	ENSG00000120254	MTHFD1L	methylenetetrahydrofolate dehydrogenase (NADP+ dependent) 1 like
chr6	151208351	151208544	*	+ 2 fold & sig. in E2	E2 vs DMSO	1.25582041413383	0.0435629982720257	Intron (ENST00000415477.1/124901432, intron 1 of 4)	-10713	NA	LOC102723831	uncharacterized LOC102723831
chr6	15159692	15160168	*	+ 2 fold & sig. in E2	E2 vs DMSO	1.52344849211422	0.0180718012688921	Distal Intergenic	-69522	NA	LOC105374945	uncharacterized LOC105374945
chr6	15404098	15404294	*	+ 2 fold & sig. in E2	E2 vs DMSO	1.4964928564501	0.0466078655677993	Intron (ENST00000341776.7/3720, intron 2 of 17)	-97064	ENSG00000008083	JARID2	jumonji and AT-rich interaction domain containing 2
chr6	158835061	158835365	*	+ 2 fold & sig. in E2	E2 vs DMSO	2.2784711869135	0.000390275892290921	Distal Intergenic	-15693	ENSG00000092820	EZR	ezrin
chr6	16494888	16495145	*	+ 2 fold & sig. in E2	E2 vs DMSO	1.77881543369153	0.00908070936365626	Intron (ENST00000244769.8/6310, intron 6 of 8)	204943	ENSG00000137198	GMPR	guanosine monophosphate reductase
chr6	166502416	166502644	*	+ 2 fold & sig. in E2	E2 vs DMSO	1.46843191211294	0.00560075960666236	Intron (ENST00000265678.9/6196, intron 6 of 20)	6789	ENSG00000222958	MIR1913	microRNA 1913
chr6	167522929	167523563	*	+ 2 fold & sig. in E2	E2 vs DMSO	3.01370058517832	6.09939149905256e-08	Distal Intergenic	-138419	ENSG00000203690	TCP10L3	t-complex 10 like 3, pseudogene
chr6	169953568	169954031	*	+ 2 fold & sig. in E2	E2 vs DMSO	1.97320491339147	0.000178264821296767	Distal Intergenic	-154019	ENSG00000229214	LINC00242	long intergenic non-protein coding RNA 242
chr6	18242441	18242704	*	+ 2 fold & sig. in E2	E2 vs DMSO	1.23569268734	0.0219583942442925	Intron (ENST00000652689.1/7913, intron 7 of 10)	3420	ENSG00000124795	DEK	DEK proto-oncogene
chr6	20210342	20210604	*	+ 2 fold & sig. in E2	E2 vs DMSO	1.94148578427443	6.7867038497523e-06	Intron (ENST00000324607.8/154141, intron 1 of 12)	-1483	NA	LOC101928573	uncharacterized LOC101928573
chr6	33732995	33733273	*	+ 2 fold & sig. in E2	E2 vs DMSO	1.33570061681146	0.000249663509791474	Intron (ENST00000293756.5/117283, intron 2 of 5)	13575	ENSG00000161896	IP6K3	inositol hexakisphosphate kinase 3
chr6	33740217	33740449	*	+ 2 fold & sig. in E2	E2 vs DMSO	1.01913267643928	0.0374008026939409	Intron (ENST00000293756.5/117283, intron 1 of 5)	6399	ENSG00000161896	IP6K3	inositol hexakisphosphate kinase 3
chr6	3718160	3718617	*	+ 2 fold & sig. in E2	E2 vs DMSO	1.2635218574796	0.00312097976523839	Intron (ENST00000665760.1/100507336, intron 1 of 2)	992	ENSG00000228793	LOC100507336	uncharacterized LOC100507336
chr6	39266849	39267183	*	+ 2 fold & sig. in E2	E2 vs DMSO	1.87830373448704	1.19810035720821e-05	Distal Intergenic	-37374	ENSG00000164626	KCNK5	potassium two pore domain channel subfamily K member 5
chr6	39274720	39275192	*	+ 2 fold & sig. in E2	E2 vs DMSO	1.72496910502152	2.36922299545027e-06	Distal Intergenic	39227	ENSG00000124780	KCNK17	potassium two pore domain channel subfamily K member 17
chr6	42129196	42129580	*	+ 2 fold & sig. in E2	E2 vs DMSO	1.21078566055227	0.00449700238397795	Intron (ENST00000696229.1/647024, intron 1 of 5)	13039	ENSG00000188112	C6orf132	chromosome 6 open reading frame 132
chr6	44254512	44255040	*	+ 2 fold & sig. in E2	E2 vs DMSO	1.02206177154689	0.000609843076237511	Promoter	-227	ENSG00000284427	MIR4647	microRNA 4647
chr6	52679306	52679563	*	+ 2 fold & sig. in E2	E2 vs DMSO	1.8348504239795	0.0281566639541138	Intron (ENST00000211314.5/28978, intron 2 of 4)	8193	ENSG00000096092	TMEM14A	transmembrane protein 14A
chr6	53859495	53859777	*	+ 2 fold & sig. in E2	E2 vs DMSO	1.86329134166068	0.000399870708005898	Intron (ENST00000487251.5/55227, intron 3 of 10)	-59463	ENSG00000137269	LRRC1	leucine rich repeat containing 1
chr6	63490978	63491418	*	+ 2 fold & sig. in E2	E2 vs DMSO	2.53138052176296	1.26126107155525e-05	Intron (ENST00000701584.1/51557, intron 1 of 5)	-30328	ENSG00000112245	PTP4A1	protein tyrosine phosphatase 4A1
chr6	6703667	6704124	*	+ 2 fold & sig. in E2	E2 vs DMSO	2.25576933109007	6.3794318341315e-08	Intron (ENST00000432823.3/101928004, intron 1 of 1)	-6353	NA	LOC101928047	uncharacterized LOC101928047
chr6	6725202	6725449	*	+ 2 fold & sig. in E2	E2 vs DMSO	1.30950035877096	0.02765172997161	Promoter	166	NA	LOC101928047	uncharacterized LOC101928047
chr6	6860985	6861270	*	+ 2 fold & sig. in E2	E2 vs DMSO	2.66188750547991	1.43954902391959e-06	Distal Intergenic	-59799	NA	LOC101928004	uncharacterized LOC101928004
chr6	7062456	7062736	*	+ 2 fold & sig. in E2	E2 vs DMSO	1.75669188763572	3.92556822057588e-05	Distal Intergenic	-44861	ENSG00000124782	RREB1	ras responsive element binding protein 1
chr6	71294118	71294601	*	+ 2 fold & sig. in E2	E2 vs DMSO	1.74769922361928	0.000407174043472597	Intron (ENST00000370435.5/79627, intron 3 of 6)	2756	ENSG00000119900	OGFRL1	opioid growth factor receptor like 1
chr6	7198052	7198549	*	+ 2 fold & sig. in E2	E2 vs DMSO	2.70053873348173	1.56407768682692e-08	Intron (ENST00000379933.7/6239, intron 6 of 11)	58807	ENSG00000124782	RREB1	ras responsive element binding protein 1
chr6	73028412	73028687	*	+ 2 fold & sig. in E2	E2 vs DMSO	1.18379649597363	0.0232455167513359	Intron (ENST00000342056.6/56479, intron 2 of 14)	-13249	ENSG00000185760	KCNQ5	potassium voltage-gated channel subfamily Q member 5
chr6	75326644	75327129	*	+ 2 fold & sig. in E2	E2 vs DMSO	1.42535512699084	0.00405614494703199	Intron (ENST00000393004.6/27145, intron 4 of 6)	7661	ENSG00000118407	FILIP1	filamin A interacting protein 1
chr6	75413246	75413699	*	+ 2 fold & sig. in E2	E2 vs DMSO	1.22595694359391	0.00392028821001557	Intron (ENST00000393004.6/27145, intron 2 of 6)	-14179	NA	NA	NA
chr6	96270228	96270607	*	+ 2 fold & sig. in E2	E2 vs DMSO	2.07421007435375	0.00119145546120861	Intron (ENST00000658843.2/100861530, intron 3 of 3)	-250988	ENSG00000014123	UFL1	UFM1 specific ligase 1
chr7	100688111	100688281	*	+ 2 fold & sig. in E2	E2 vs DMSO	2.16506408132095	0.00025104252194409	Promoter	0	ENSG00000146830	GIGYF1	GRB10 interacting GYF protein 1
chr7	102993058	102993347	*	+ 2 fold & sig. in E2	E2 vs DMSO	1.31276487161637	0.0107513253770766	Intron (ENST00000440067.4/222235, intron 7 of 20)	19529	ENSG00000230257	NFE4	nuclear factor, erythroid 4
chr7	110760698	110761118	*	+ 2 fold & sig. in E2	E2 vs DMSO	1.50685623474446	0.000411811651109981	Intron (ENST00000405709.7/83943, intron 5 of 5)	-34873	NA	NA	NA
chr7	111569200	111569416	*	+ 2 fold & sig. in E2	E2 vs DMSO	1.99041097851608	0.0132355425599488	Distal Intergenic	-6683	ENSG00000184903	IMMP2L	inner mitochondrial membrane peptidase subunit 2
chr7	112364953	112365381	*	+ 2 fold & sig. in E2	E2 vs DMSO	1.749400742544	0.017115048013205	Intron (ENST00000431064.1/105375456, intron 3 of 3)	-14412	NA	NA	NA
chr7	116477288	116477591	*	+ 2 fold & sig. in E2	E2 vs DMSO	1.94708527450717	0.00044487079518071	Intron (ENST00000477018.5/105375463, intron 8 of 10)	5192	NA	LOC107986838	uncharacterized LOC107986838
chr7	121328487	121328960	*	+ 2 fold & sig. in E2	E2 vs DMSO	1.23753775565854	0.00878365674735799	Promoter	-40	ENSG00000002745	WNT16	Wnt family member 16
chr7	12634652	12634915	*	+ 2 fold & sig. in E2	E2 vs DMSO	1.54589743941831	0.00916168201954723	Intron (ENST00000341757.9/85477, intron 9 of 14)	11814	ENSG00000006747	SCIN	scinderin
chr7	131626684	131627009	*	+ 2 fold & sig. in E2	E2 vs DMSO	2.19860610177007	1.42799464333901e-06	Distal Intergenic	-68467	ENSG00000128567	PODXL	podocalyxin like
chr7	132117257	132117522	*	+ 2 fold & sig. in E2	E2 vs DMSO	1.50670732587272	0.000502347254636415	Distal Intergenic	27985	ENSG00000221866	PLXNA4	plexin A4
chr7	132633911	132634420	*	+ 2 fold & sig. in E2	E2 vs DMSO	2.01602671222403	2.56019093296121e-05	Intron (ENST00000378539.5/91584, intron 2 of 4)	14268	ENSG00000221866	PLXNA4	plexin A4
chr7	142332355	142332821	*	+ 2 fold & sig. in E2	E2 vs DMSO	1.61164157325172	0.00669561169985035	Exon (ENST00000547918.2/ENST00000547918.2, exon 2 of 2)	-60120	ENSG00000186163	PRSS59P	serine protease 59, pseudogene
chr7	151856524	151856923	*	+ 2 fold & sig. in E2	E2 vs DMSO	2.56161917559889	9.87309220534404e-09	Intron (ENST00000287878.9/51422, intron 1 of 15)	19865	ENSG00000106617	PRKAG2	protein kinase AMP-activated non-catalytic subunit gamma 2
chr7	155581046	155581588	*	+ 2 fold & sig. in E2	E2 vs DMSO	2.08009473938561	2.94954916323805e-07	Intron (ENST00000635903.1/285888, intron 1 of 8)	3958	ENSG00000146910	CNPY1	canopy FGF signaling regulator 1
chr7	155665951	155666265	*	+ 2 fold & sig. in E2	E2 vs DMSO	1.30400554600475	0.0349439555629618	Intron (ENST00000287912.7/155435, intron 2 of 5)	-6615	ENSG00000184863	RBM33	RNA binding motif protein 33
chr7	157621147	157621484	*	+ 2 fold & sig. in E2	E2 vs DMSO	1.659786488385	0.00475360637504244	Promoter	25	ENSG00000155093	PTPRN2	protein tyrosine phosphatase receptor type N2
chr7	17232571	17232957	*	+ 2 fold & sig. in E2	E2 vs DMSO	1.54209445111945	0.00347471177226228	Intron (ENST00000642825.1/196, intron 2 of 14)	48346	NA	LOC101927609	uncharacterized LOC101927609
chr7	2539530	2539744	*	+ 2 fold & sig. in E2	E2 vs DMSO	1.34669918261542	0.000712969431949944	Exon (ENST00000340611.9/221927, exon 12 of 14)	1280	ENSG00000106009	BRAT1	BRCA1 associated ATM activator 1
chr7	26553612	26553913	*	+ 2 fold & sig. in E2	E2 vs DMSO	1.6080838143287	0.00187160292696446	Intron (ENST00000667848.1/100506289, intron 1 of 2)	1773	ENSG00000233760	LOC100506289	uncharacterized LOC100506289
chr7	26590680	26591222	*	+ 2 fold & sig. in E2	E2 vs DMSO	1.82562800790734	0.000556465623010941	Distal Intergenic	26073	NA	LOC101928077	uncharacterized LOC101928077
chr7	2713503	2713750	*	+ 2 fold & sig. in E2	E2 vs DMSO	1.02175103791974	0.049880486840568	3' UTR	10973	ENSG00000174945	AMZ1	archaelysin family metallopeptidase 1
chr7	2750159	2750484	*	+ 2 fold & sig. in E2	E2 vs DMSO	1.48221296740461	0.0393362716378084	Intron (ENST00000489665.1/155185, intron 4 of 4)	9968	ENSG00000146535	GNA12	G protein subunit alpha 12
chr7	29304711	29305036	*	+ 2 fold & sig. in E2	E2 vs DMSO	1.33980167337025	0.0300806469469578	Intron (ENST00000439384.6/1124, intron 2 of 6)	15830	ENSG00000106069	CHN2	chimerin 2
chr7	3168779	3169179	*	+ 2 fold & sig. in E2	E2 vs DMSO	1.89521059979724	0.000241018063722602	Intron (ENST00000404626.4/100129603, intron 1 of 3)	5475	NA	LOC100129603	uncharacterized LOC100129603
chr7	3261139	3261474	*	+ 2 fold & sig. in E2	E2 vs DMSO	1.34229419115939	0.0219619764517656	Distal Intergenic	-39778	ENSG00000146555	SDK1	sidekick cell adhesion molecule 1
chr7	34622560	34622766	*	+ 2 fold & sig. in E2	E2 vs DMSO	2.45763452768883	0.0173518620830937	Intron (ENST00000419766.5/404744, intron 2 of 4)	-35452	ENSG00000187258	NPSR1	neuropeptide S receptor 1
chr7	45236703	45236996	*	+ 2 fold & sig. in E2	E2 vs DMSO	2.28791632891553	0.000100252246337797	Distal Intergenic	78874	ENSG00000122679	RAMP3	receptor activity modifying protein 3
chr7	45243982	45244281	*	+ 2 fold & sig. in E2	E2 vs DMSO	2.07823429402107	4.09597851628128e-05	Distal Intergenic	86153	ENSG00000122679	RAMP3	receptor activity modifying protein 3
chr7	45544295	45544662	*	+ 2 fold & sig. in E2	E2 vs DMSO	2.12333174012589	4.5848746211595e-07	Distal Intergenic	-29478	ENSG00000164742	ADCY1	adenylate cyclase 1
chr7	45568752	45569113	*	+ 2 fold & sig. in E2	E2 vs DMSO	1.1397184767341	0.0292098305770631	Distal Intergenic	-5027	ENSG00000164742	ADCY1	adenylate cyclase 1
chr7	45710880	45711047	*	+ 2 fold & sig. in E2	E2 vs DMSO	1.20930280930375	0.0411890728939134	Intron (ENST00000297323.12/107, intron 19 of 19)	17263	ENSG00000214765	SEPTIN7P2	septin 7 pseudogene 2
chr7	45876475	45876698	*	+ 2 fold & sig. in E2	E2 vs DMSO	2.06013473891848	0.00298927954843834	Distal Intergenic	-3393	NA	CCDC201	coiled-coil domain containing 201
chr7	47542042	47542496	*	+ 2 fold & sig. in E2	E2 vs DMSO	2.16201667292183	5.4930559102307e-05	Intron (ENST00000311160.14/64759, intron 1 of 30)	-2441	ENSG00000136205	TNS3	tensin 3
chr7	50920234	50920569	*	+ 2 fold & sig. in E2	E2 vs DMSO	1.08647177717765	0.0240371925807043	Intron (ENST00000420449.1/ENST00000420449.1, intron 1 of 3)	14924	NA	NA	NA
chr7	74188012	74188275	*	+ 2 fold & sig. in E2	E2 vs DMSO	1.01331915612196	0.0293242707476937	Intron (ENST00000678438.1/7458, intron 2 of 6)	-2923	ENSG00000207741	MIR590	microRNA 590
chr7	75000859	75001199	*	+ 2 fold & sig. in E2	E2 vs DMSO	1.4549018435425	0.00787449386956045	Intron (ENST00000616305.2/729438, intron 1 of 8)	-6689	ENSG00000274070	CASTOR2	cytosolic arginine sensor for mTORC1 subunit 2
chr7	75989766	75990088	*	+ 2 fold & sig. in E2	E2 vs DMSO	1.13042918774248	0.0286290410807519	Promoter	-588	ENSG00000189077	TMEM120A	transmembrane protein 120A
chr7	76310232	76310410	*	+ 2 fold & sig. in E2	E2 vs DMSO	1.3739733855986	0.000899660130098044	Distal Intergenic	6655	ENSG00000106211	HSPB1	heat shock protein family B (small) member 1
chr7	76570390	76570788	*	+ 2 fold & sig. in E2	E2 vs DMSO	1.97375613102396	0.000174051819839933	Intron (ENST00000418663.5/100133091, intron 2 of 2)	20979	ENSG00000205485	LOC100133091	uncharacterized LOC100133091
chr7	81065441	81065701	*	+ 2 fold & sig. in E2	E2 vs DMSO	1.50785076031337	0.00196631215658234	Distal Intergenic	-143082	ENSG00000075223	SEMA3C	semaphorin 3C
chr7	83941364	83941640	*	+ 2 fold & sig. in E2	E2 vs DMSO	1.6081567380772	0.0077583279260648	Distal Intergenic	253149	ENSG00000075213	SEMA3A	semaphorin 3A
chr7	88274942	88275160	*	+ 2 fold & sig. in E2	E2 vs DMSO	1.84110818437998	0.00449581243521813	3' UTR	-4413	NA	NA	NA
chr7	88534035	88534368	*	+ 2 fold & sig. in E2	E2 vs DMSO	1.36359373316662	0.00118048112990517	Exon (ENST00000663862.1/107986816, exon 2 of 5)	-84804	NA	NA	NA
chr7	93336938	93337426	*	+ 2 fold & sig. in E2	E2 vs DMSO	1.15917726968397	0.00648311542204858	Intron (ENST00000544910.5/55610, intron 23 of 28)	3039	ENSG00000004766	VPS50	VPS50 subunit of EARP/GARPII complex
chr7	99643673	99643902	*	+ 2 fold & sig. in E2	E2 vs DMSO	1.72100576419161	0.0490776587124469	Distal Intergenic	16700	ENSG00000106258	CYP3A5	cytochrome P450 family 3 subfamily A member 5
chr8	104238955	104239361	*	+ 2 fold & sig. in E2	E2 vs DMSO	1.87830233679721	0.00355316314431376	Intron (ENST00000696799.1/9699, intron 25 of 29)	15591	ENSG00000176406	RIMS2	regulating synaptic membrane exocytosis 2
chr8	108432258	108432481	*	+ 2 fold & sig. in E2	E2 vs DMSO	2.34401321338314	0.0349033919010997	Intron (ENST00000677409.1/3646, intron 1 of 13)	2852	NA	LOC105375704	uncharacterized LOC105375704
chr8	109682749	109683006	*	+ 2 fold & sig. in E2	E2 vs DMSO	1.73517986851801	0.0353809453045532	Intron (ENST00000532779.5/55638, intron 1 of 5)	-1744	ENSG00000147642	SYBU	syntabulin
chr8	115238109	115238444	*	+ 2 fold & sig. in E2	E2 vs DMSO	1.92444309325557	0.00501117860155707	Distal Intergenic	253777	ENSG00000104447	TRPS1	transcriptional repressor GATA binding 1
chr8	11726694	11727248	*	+ 2 fold & sig. in E2	E2 vs DMSO	1.06749860408569	0.00475360637504244	Intron (ENST00000528712.5/2626, intron 2 of 6)	22472	ENSG00000136574	GATA4	GATA binding protein 4
chr8	118383203	118383428	*	+ 2 fold & sig. in E2	E2 vs DMSO	1.32682520157341	0.0223644213378139	Intron (ENST00000430457.1/105375724, intron 1 of 2)	56433	ENSG00000177570	SAMD12	sterile alpha motif domain containing 12
chr8	120222983	120223419	*	+ 2 fold & sig. in E2	E2 vs DMSO	1.32345131131191	0.0152462428631935	Intron (ENST00000498051.6/7373, intron 18 of 22)	26067	ENSG00000187955	COL14A1	collagen type XIV alpha 1 chain
chr8	121406406	121406807	*	+ 2 fold & sig. in E2	E2 vs DMSO	1.18396431866802	0.00752997447080119	Distal Intergenic	-232486	NA	HAS2-AS1	HAS2 antisense RNA 1
chr8	121432428	121432642	*	+ 2 fold & sig. in E2	E2 vs DMSO	1.59902064822381	0.00122586620475138	Distal Intergenic	-206651	NA	HAS2-AS1	HAS2 antisense RNA 1
chr8	122421670	122421935	*	+ 2 fold & sig. in E2	E2 vs DMSO	1.82981301877199	0.0356128291286871	Intron (ENST00000533992.1/105375734, intron 1 of 2)	6616	NA	SMILR	smooth muscle induced lncRNA, enhancer of proliferation
chr8	124880107	124880392	*	+ 2 fold & sig. in E2	E2 vs DMSO	1.48686758063593	0.0333016158890291	Intron (ENST00000657463.1/157381, intron 1 of 4)	12095	ENSG00000249816	LINC00964	long intergenic non-protein coding RNA 964
chr8	126927528	126927930	*	+ 2 fold & sig. in E2	E2 vs DMSO	1.07055056942847	0.030067458625921	Promoter	251	ENSG00000253438	PCAT1	prostate cancer associated transcript 1
chr8	127488578	127488755	*	+ 2 fold & sig. in E2	E2 vs DMSO	2.37660291836739	0.00642138223633932	Distal Intergenic	-6439	ENSG00000246228	CASC8	cancer susceptibility 8
chr8	127726570	127726898	*	+ 2 fold & sig. in E2	E2 vs DMSO	1.43242567871243	0.00386155997858841	Intron (ENST00000502463.7/100270680, intron 1 of 2)	7058	ENSG00000249375	CASC11	cancer susceptibility 11
chr8	127741759	127742292	*	+ 2 fold & sig. in E2	E2 vs DMSO	1.24077130121318	5.6759315048127e-05	3' UTR	2686	ENSG00000136997	MYC	MYC proto-oncogene, bHLH transcription factor
chr8	129459818	129460180	*	+ 2 fold & sig. in E2	E2 vs DMSO	1.34042021059999	0.0375352352597179	Intron (ENST00000675388.1/137196, intron 2 of 8)	23962	ENSG00000263763	MIR3686	microRNA 3686
chr8	13159289	13159574	*	+ 2 fold & sig. in E2	E2 vs DMSO	1.67246030592647	0.00102725026425765	Intron (ENST00000662638.1/ENST00000662638.1, intron 1 of 1)	-25815	ENSG00000164741	DLC1	DLC1 Rho GTPase activating protein
chr8	140257777	140258223	*	+ 2 fold & sig. in E2	E2 vs DMSO	1.73825367595902	0.000197499858357108	Intron (ENST00000438773.4/83696, intron 15 of 22)	4507	ENSG00000167632	TRAPPC9	trafficking protein particle complex subunit 9
chr8	141549891	141550217	*	+ 2 fold & sig. in E2	E2 vs DMSO	1.43323185537503	0.01327781860153	Distal Intergenic	35220	NA	LOC122455339	uncharacterized LOC122455339
chr8	142546759	142547122	*	+ 2 fold & sig. in E2	E2 vs DMSO	2.08883864940828	0.0124933015421691	Distal Intergenic	3258	ENSG00000181790	ADGRB1	adhesion G protein-coupled receptor B1
chr8	17329632	17330128	*	+ 2 fold & sig. in E2	E2 vs DMSO	2.4470210179874	2.01609791913021e-06	Intron (ENST00000180173.10/9108, intron 7 of 13)	-17769	ENSG00000003987	MTMR7	myotubularin related protein 7
chr8	21492285	21492771	*	+ 2 fold & sig. in E2	E2 vs DMSO	1.75933726929992	0.00214452729695291	Distal Intergenic	194079	ENSG00000254334	LOC101929172	uncharacterized LOC101929172
chr8	21492879	21493079	*	+ 2 fold & sig. in E2	E2 vs DMSO	1.69015730156053	0.0382194284214074	Distal Intergenic	194673	ENSG00000254334	LOC101929172	uncharacterized LOC101929172
chr8	21560514	21560977	*	+ 2 fold & sig. in E2	E2 vs DMSO	1.30304795265842	0.00633033592122727	Distal Intergenic	227182	ENSG00000168546	GFRA2	GDNF family receptor alpha 2
chr8	37684410	37684740	*	+ 2 fold & sig. in E2	E2 vs DMSO	1.37939939826423	0.00916538476352181	Distal Intergenic	-11042	ENSG00000183779	ZNF703	zinc finger protein 703
chr8	37852929	37853456	*	+ 2 fold & sig. in E2	E2 vs DMSO	2.35530436856646	1.39838443064213e-07	Distal Intergenic	-3068	ENSG00000104221	BRF2	BRF2 RNA polymerase III transcription initiation factor subunit
chr8	41110532	41110739	*	+ 2 fold & sig. in E2	E2 vs DMSO	1.53851710648584	0.0147981702737265	Distal Intergenic	160404	ENSG00000263372	MIR548AO	microRNA 548ao
chr8	41808984	41809383	*	+ 2 fold & sig. in E2	E2 vs DMSO	2.46125011263489	1.26323848192494e-05	Intron (ENST00000265709.14/286, intron 1 of 42)	11181	NA	LOC105379392	uncharacterized LOC105379392
chr8	48432759	48433325	*	+ 2 fold & sig. in E2	E2 vs DMSO	1.42647326927355	0.0238135437698233	Distal Intergenic	84717	NA	LOC105375822	uncharacterized LOC105375822
chr8	51501257	51501564	*	+ 2 fold & sig. in E2	E2 vs DMSO	2.00173891171995	0.0162620071843658	Intron (ENST00000356297.5/137902, intron 4 of 22)	-91836	ENSG00000147485	PXDNL	peroxidasin like
chr8	58119703	58120119	*	+ 2 fold & sig. in E2	E2 vs DMSO	1.62214552007755	0.00140309655927693	Intron (ENST00000519262.6/90362, intron 3 of 3)	49385	ENSG00000169122	FAM110B	family with sequence similarity 110 member B
chr8	61078049	61078430	*	+ 2 fold & sig. in E2	E2 vs DMSO	1.64974529637784	0.049387866965359	Intron (ENST00000522621.1/157807, intron 1 of 2)	20891	ENSG00000177182	CLVS1	clavesin 1
chr8	69079960	69080266	*	+ 2 fold & sig. in E2	E2 vs DMSO	1.35608055394233	0.0182167307752031	Intron (ENST00000518540.5/100505718, intron 1 of 4)	23924	ENSG00000253658	LINC01592	long intergenic non-protein coding RNA 1592
chr8	69777654	69777955	*	+ 2 fold & sig. in E2	E2 vs DMSO	1.36191040797104	0.0148338050682438	Intron (ENST00000260126.9/81796, intron 2 of 9)	54760	ENSG00000137571	SLCO5A1	solute carrier organic anion transporter family member 5A1
chr8	82937005	82937528	*	+ 2 fold & sig. in E2	E2 vs DMSO	1.64531133791574	0.0251429554461772	Intron (ENST00000663058.1/105375931, intron 7 of 7)	24901	ENSG00000254394	LOC101927141	uncharacterized LOC101927141
chr8	85907580	85907847	*	+ 2 fold & sig. in E2	E2 vs DMSO	1.14358231734687	0.0123296597146106	Intron (ENST00000648211.1/124901971, intron 2 of 2)	-46018	ENSG00000285768	LINC02849	long intergenic non-protein coding RNA 2849
chr8	90581357	90581701	*	+ 2 fold & sig. in E2	E2 vs DMSO	1.58186897164173	0.0215474681187314	Intron (ENST00000667296.1/100874052, intron 3 of 4)	24364	ENSG00000253799	LINC01030	long intergenic non-protein coding RNA 1030
chr8	90887564	90888025	*	+ 2 fold & sig. in E2	E2 vs DMSO	1.84446753833742	4.11223971630237e-06	Intron (ENST00000417640.7/64168, intron 5 of 12)	-28324	NA	LOC105375635	uncharacterized LOC105375635
chr8	95693062	95693226	*	+ 2 fold & sig. in E2	E2 vs DMSO	2.26542100217853	0.00926634830667318	Intron (ENST00000671532.1/100616530, intron 3 of 3)	82398	ENSG00000253773	CFAP418-AS1	CFAP418 antisense RNA 1
chr8	96359813	96360132	*	+ 2 fold & sig. in E2	E2 vs DMSO	1.35132244425863	0.00737226269757929	Distal Intergenic	26516	NA	LOC102724804	uncharacterized LOC102724804
chr8	9677072	9677295	*	+ 2 fold & sig. in E2	E2 vs DMSO	1.12153836677425	0.034099789589103	Intron (ENST00000310430.11/8658, intron 3 of 26)	-2459	ENSG00000173273	TNKS	tankyrase
chr8	97764203	97764699	*	+ 2 fold & sig. in E2	E2 vs DMSO	2.41628746622881	8.32583979983346e-07	Distal Intergenic	-10358	ENSG00000104341	LAPTM4B	lysosomal protein transmembrane 4 beta
chr8	98132503	98132778	*	+ 2 fold & sig. in E2	E2 vs DMSO	1.69809605871323	0.0252946747554919	Intron (ENST00000401707.7/10940, intron 5 of 15)	14663	ENSG00000104356	POP1	POP1 homolog, ribonuclease P/MRP subunit
chr8	99416543	99416704	*	+ 2 fold & sig. in E2	E2 vs DMSO	1.9139075101669	0.0125859762707767	Intron (ENST00000496144.5/157680, intron 21 of 33)	26927	ENSG00000132549	VPS13B	vacuolar protein sorting 13 homolog B
chr9	101014299	101014557	*	+ 2 fold & sig. in E2	E2 vs DMSO	1.5054802774887	0.0337476381287682	Distal Intergenic	-14170	ENSG00000148123	PLPPR1	phospholipid phosphatase related 1
chr9	105979581	105979738	*	+ 2 fold & sig. in E2	E2 vs DMSO	1.97288145250538	0.00750032523970362	Distal Intergenic	-13572	ENSG00000234323	LINC01505	long intergenic non-protein coding RNA 1505
chr9	107131389	107132102	*	+ 2 fold & sig. in E2	E2 vs DMSO	1.96381365283059	1.32530317581602e-05	Distal Intergenic	-28401	ENSG00000230782	LOC340512	uncharacterized LOC340512
chr9	107547750	107548090	*	+ 2 fold & sig. in E2	E2 vs DMSO	2.02004394387877	2.19035690530936e-05	Distal Intergenic	-57268	ENSG00000136826	KLF4	Kruppel like factor 4
chr9	107678452	107678682	*	+ 2 fold & sig. in E2	E2 vs DMSO	1.72839807220727	0.0142677665040113	Distal Intergenic	-187970	ENSG00000136826	KLF4	Kruppel like factor 4
chr9	108483758	108484028	*	+ 2 fold & sig. in E2	E2 vs DMSO	1.7895767163591	3.15937865137752e-05	Distal Intergenic	371958	ENSG00000148156	ACTL7B	actin like 7B
chr9	109458393	109458543	*	+ 2 fold & sig. in E2	E2 vs DMSO	1.95971979342692	0.00467952954235982	Intron (ENST00000262539.7/5774, intron 2 of 25)	-7009	ENSG00000070159	PTPN3	protein tyrosine phosphatase non-receptor type 3
chr9	112033734	112033943	*	+ 2 fold & sig. in E2	E2 vs DMSO	1.15331414624014	0.0045288697285417	Exon (ENST00000563434.1/ENST00000563434.1, exon 2 of 2)	24528	ENSG00000106868	SUSD1	sushi domain containing 1
chr9	114184226	114184429	*	+ 2 fold & sig. in E2	E2 vs DMSO	1.17573014644677	0.0162492719229693	Intron (ENST00000356083.8/85301, intron 5 of 60)	15618	ENSG00000196739	COL27A1	collagen type XXVII alpha 1 chain
chr9	114529121	114529505	*	+ 2 fold & sig. in E2	E2 vs DMSO	1.94675549645891	0.0111025895069969	Distal Intergenic	-23648	ENSG00000095397	WHRN	whirlin
chr9	114545177	114545539	*	+ 2 fold & sig. in E2	E2 vs DMSO	1.28120499326269	0.0129762935848281	Distal Intergenic	-39704	ENSG00000095397	WHRN	whirlin
chr9	115326533	115326785	*	+ 2 fold & sig. in E2	E2 vs DMSO	1.2659803300265	0.0425716268795446	Intron (ENST00000374016.5/50514, intron 4 of 7)	35736	ENSG00000173077	DELEC1	deleted in esophageal cancer 1
chr9	120873030	120873246	*	+ 2 fold & sig. in E2	E2 vs DMSO	1.183788380859	0.0124701790905673	Intron (ENST00000373896.8/26147, intron 3 of 14)	3187	ENSG00000119403	PHF19	PHD finger protein 19
chr9	124527825	124528118	*	+ 2 fold & sig. in E2	E2 vs DMSO	1.46738059796447	0.0351255392457398	Intron (ENST00000487099.7/2649, intron 7 of 9)	-20405	ENSG00000136931	NR5A1	nuclear receptor subfamily 5 group A member 1
chr9	124749912	124750201	*	+ 2 fold & sig. in E2	E2 vs DMSO	1.3710206142919	0.0181262464425213	Intron (ENST00000487099.7/2649, intron 1 of 9)	-19922	NA	LOC107987126	uncharacterized LOC107987126
chr9	125438905	125439356	*	+ 2 fold & sig. in E2	E2 vs DMSO	2.46642182251769	3.25616205379171e-06	3' UTR	11745	ENSG00000119487	MAPKAP1	MAPK associated protein 1
chr9	125561797	125562119	*	+ 2 fold & sig. in E2	E2 vs DMSO	2.15921311994969	1.5910931469749e-05	Intron (ENST00000373511.6/79109, intron 5 of 10)	-5460	NA	LOC105376272	uncharacterized LOC105376272
chr9	127762038	127762466	*	+ 2 fold & sig. in E2	E2 vs DMSO	1.9896161238681	2.46061859505366e-05	Promoter	0	ENSG00000095370	SH2D3C	SH2 domain containing 3C
chr9	127952156	127952330	*	+ 2 fold & sig. in E2	E2 vs DMSO	1.17660154249293	0.000105214099194378	Intron (ENST00000373095.6/399665, intron 3 of 10)	-1434	ENSG00000167106	FAM102A	family with sequence similarity 102 member A
chr9	128050880	128051140	*	+ 2 fold & sig. in E2	E2 vs DMSO	1.08189090854642	0.0413085171298097	Intron (ENST00000414976.1/ENST00000414976.1, intron 1 of 1)	12602	ENSG00000171169	NAIF1	nuclear apoptosis inducing factor 1
chr9	128058032	128058391	*	+ 2 fold & sig. in E2	E2 vs DMSO	1.96404930996641	4.26696181899618e-05	Distal Intergenic	5351	ENSG00000171169	NAIF1	nuclear apoptosis inducing factor 1
chr9	128644523	128644687	*	+ 2 fold & sig. in E2	E2 vs DMSO	1.1798077925492	0.0289382040343922	Intron (ENST00000372715.7/89891, intron 1 of 8)	-7495	ENSG00000119333	DYNC2I2	dynein 2 intermediate chain 2
chr9	129324947	129325229	*	+ 2 fold & sig. in E2	E2 vs DMSO	1.9478875663508	4.08201574755791e-05	Downstream (<=300bp)	3931	NA	LINC02913	long intergenic non-protein coding RNA 2913
chr9	129349206	129349770	*	+ 2 fold & sig. in E2	E2 vs DMSO	2.20911112730929	2.23956952673192e-06	Intron (ENST00000657886.1/100506119, intron 3 of 4)	7581	ENSG00000233901	LINC01503	long intergenic non-protein coding RNA 1503
chr9	129476832	129477187	*	+ 2 fold & sig. in E2	E2 vs DMSO	1.98473333596929	1.36777387332395e-07	Promoter	0	NA	NA	NA
chr9	129755639	129755992	*	+ 2 fold & sig. in E2	E2 vs DMSO	1.83997835774038	0.000197522924873439	Distal Intergenic	-2597	ENSG00000148344	PTGES	prostaglandin E synthase
chr9	132237628	132237870	*	+ 2 fold & sig. in E2	E2 vs DMSO	1.12523142204509	0.00368231398818907	Intron (ENST00000393229.4/84628, intron 5 of 7)	-2738	ENSG00000196358	NTNG2	netrin G2
chr9	134359395	134359763	*	+ 2 fold & sig. in E2	E2 vs DMSO	1.30643087596623	2.44390600768981e-05	Intron (ENST00000484822.1/6256, intron 2 of 2)	-12208	ENSG00000186350	RXRA	retinoid X receptor alpha
chr9	134960515	134960912	*	+ 2 fold & sig. in E2	E2 vs DMSO	1.85572075036257	0.00122524221932537	Distal Intergenic	23582	NA	LOC105376314	uncharacterized LOC105376314
chr9	136008318	136008756	*	+ 2 fold & sig. in E2	E2 vs DMSO	1.85169802964416	0.000326946987083462	3' UTR	10724	ENSG00000148411	NACC2	NACC family member 2
chr9	20478360	20478783	*	+ 2 fold & sig. in E2	E2 vs DMSO	1.34128850574382	0.0088280658761788	Intron (ENST00000380338.9/4300, intron 2 of 10)	23559	ENSG00000264941	MIR4474	microRNA 4474
chr9	2495524	2495923	*	+ 2 fold & sig. in E2	E2 vs DMSO	2.49422226897025	9.78947988247268e-06	Intron (ENST00000648733.1/101930053, intron 8 of 11)	40473	NA	LOC101930053	uncharacterized LOC101930053
chr9	28539548	28539698	*	+ 2 fold & sig. in E2	E2 vs DMSO	1.41251228424227	0.0315809034941426	Promoter	-37	NA	LOC105376004	uncharacterized LOC105376004
chr9	33199849	33200120	*	+ 2 fold & sig. in E2	E2 vs DMSO	1.96838881134315	0.0145154936660841	Distal Intergenic	-18245	ENSG00000122711	SPINK4	serine peptidase inhibitor Kazal type 4
chr9	36431216	36431433	*	+ 2 fold & sig. in E2	E2 vs DMSO	1.37303941560318	0.00695398282475477	Intron (ENST00000488058.1/152006, intron 1 of 3)	-30018	ENSG00000137075	RNF38	ring finger protein 38
chr9	36717393	36717687	*	+ 2 fold & sig. in E2	E2 vs DMSO	1.41568697229914	0.0119627510280347	Distal Intergenic	-61788	NA	LOC105376030	uncharacterized LOC105376030
chr9	37799777	37800189	*	+ 2 fold & sig. in E2	E2 vs DMSO	1.25787320858326	0.00635657964248472	Promoter	-365	ENSG00000122741	DCAF10	DDB1 and CUL4 associated factor 10
chr9	4852641	4852893	*	+ 2 fold & sig. in E2	E2 vs DMSO	2.0514050022234	0.000398254375480184	Intron (ENST00000381750.9/10171, intron 8 of 8)	2344	ENSG00000199065	MIR101-2	microRNA 101-2
chr9	4923244	4923441	*	+ 2 fold & sig. in E2	E2 vs DMSO	1.30031061209274	0.0225053082362944	Distal Intergenic	-60949	ENSG00000096968	JAK2	Janus kinase 2
chr9	4929909	4930171	*	+ 2 fold & sig. in E2	E2 vs DMSO	1.76958711669722	0.00091207809949605	Distal Intergenic	-54219	ENSG00000096968	JAK2	Janus kinase 2
chr9	6788186	6788421	*	+ 2 fold & sig. in E2	E2 vs DMSO	1.23788150634491	0.0142714785793462	Intron (ENST00000536108.5/23081, intron 1 of 17)	-17196	ENSG00000107077	KDM4C	lysine demethylase 4C
chr9	69340274	69340430	*	+ 2 fold & sig. in E2	E2 vs DMSO	2.52564428009625	0.000976770850474683	Intron (ENST00000455972.6/9413, intron 2 of 10)	10949	ENSG00000135063	FAM189A2	family with sequence similarity 189 member A2
chr9	70449556	70449836	*	+ 2 fold & sig. in E2	E2 vs DMSO	1.63673522868317	0.000839220993042753	Distal Intergenic	-34899	ENSG00000119138	KLF9	Kruppel like factor 9
chr9	71779701	71780002	*	+ 2 fold & sig. in E2	E2 vs DMSO	2.60172668204499	1.495504497339e-07	Intron (ENST00000545719.1/23670, intron 2 of 2)	-11188	ENSG00000135048	CEMIP2	cell migration inducing hyaluronidase 2
chr9	75181913	75182073	*	+ 2 fold & sig. in E2	E2 vs DMSO	1.58569376198088	0.0120174063786862	Distal Intergenic	93399	ENSG00000134996	OSTF1	osteoclast stimulating factor 1
chr9	76980777	76981074	*	+ 2 fold & sig. in E2	E2 vs DMSO	1.48848125743887	0.0149373386857367	Distal Intergenic	-38581	ENSG00000204612	FOXB2	forkhead box B2
chr9	77588647	77588844	*	+ 2 fold & sig. in E2	E2 vs DMSO	1.33399815658485	5.07880548135201e-05	Intron (ENST00000341700.7/9630, intron 1 of 6)	59478	ENSG00000156049	GNA14	G protein subunit alpha 14
chr9	80938349	80938665	*	+ 2 fold & sig. in E2	E2 vs DMSO	1.87978214627826	8.02086033327435e-05	Distal Intergenic	-67054	NA	LOC105376105	uncharacterized LOC105376105
chr9	89765293	89765546	*	+ 2 fold & sig. in E2	E2 vs DMSO	1.55360820856052	0.0152462428631935	Distal Intergenic	-34149	NA	LOC101927823	uncharacterized LOC101927823
chr9	93527138	93527497	*	+ 2 fold & sig. in E2	E2 vs DMSO	1.32929717519877	0.000729502551825612	Exon (ENST00000277165.11/23196, exon 8 of 18)	-1973	ENSG00000048828	FAM120A	family with sequence similarity 120A
chr9	95852671	95852935	*	+ 2 fold & sig. in E2	E2 vs DMSO	1.16800156858481	0.0306800457962671	Intron (ENST00000433656.2/100128782, intron 1 of 3)	-18329	ENSG00000182150	ERCC6L2	ERCC excision repair 6 like 2
chr9	97572526	97572803	*	+ 2 fold & sig. in E2	E2 vs DMSO	1.8022758532344	0.025028575868061	Intron (ENST00000395211.6/7111, intron 8 of 9)	17091	ENSG00000136842	TMOD1	tropomodulin 1
chrX	10032293	10032533	*	+ 2 fold & sig. in E2	E2 vs DMSO	1.33226434653595	0.0441895644116382	Intron (ENST00000380861.10/55841, intron 2 of 23)	16498	ENSG00000047644	WWC3	WWC family member 3
chrX	103550021	103550920	*	+ 2 fold & sig. in E2	E2 vs DMSO	1.97975919053246	5.30334427507241e-07	Distal Intergenic	-25311	ENSG00000133142	TCEAL4	transcription elongation factor A like 4
chrX	109967057	109967426	*	+ 2 fold & sig. in E2	E2 vs DMSO	1.19528664559999	0.029906029402797	Distal Intergenic	-35205	ENSG00000157600	TMEM164	transmembrane protein 164
chrX	110161183	110161384	*	+ 2 fold & sig. in E2	E2 vs DMSO	1.74612391191385	0.00313624254725424	Intron (ENST00000372072.7/84187, intron 4 of 5)	16328	ENSG00000157600	TMEM164	transmembrane protein 164
chrX	110188611	110188797	*	+ 2 fold & sig. in E2	E2 vs DMSO	2.2279512043262	0.000458993275798773	Distal Intergenic	36266	ENSG00000208883	SNORD96B	small nucleolar RNA, C/D box 96B
chrX	123869623	123869865	*	+ 2 fold & sig. in E2	E2 vs DMSO	1.16268114431927	0.013068638195662	Intron (ENST00000422098.6/331, intron 3 of 8)	9169	ENSG00000101966	XIAP	X-linked inhibitor of apoptosis
chrX	131081638	131081849	*	+ 2 fold & sig. in E2	E2 vs DMSO	1.0616287995118	0.038704321102016	5' UTR	-1861	ENSG00000147256	ARHGAP36	Rho GTPase activating protein 36
chrX	131394446	131394695	*	+ 2 fold & sig. in E2	E2 vs DMSO	1.69375399712055	0.0231442826312365	Intron (ENST00000668852.1/107985705, intron 1 of 2)	8993	NA	LOC107985705	uncharacterized LOC107985705
chrX	131574438	131574719	*	+ 2 fold & sig. in E2	E2 vs DMSO	1.63320892823613	0.00616656954086826	Intron (ENST00000370904.6/3547, intron 1 of 26)	-3962	NA	NA	NA
chrX	131623990	131624263	*	+ 2 fold & sig. in E2	E2 vs DMSO	2.35096609071359	0.00296653415893162	Distal Intergenic	-45091	ENSG00000147255	IGSF1	immunoglobulin superfamily member 1
chrX	132774412	132774637	*	+ 2 fold & sig. in E2	E2 vs DMSO	1.6949136670774	0.00387779876625994	Intron (ENST00000370833.7/90161, intron 2 of 4)	106770	ENSG00000235849	HS6ST2-AS1	HS6ST2 antisense RNA 1
chrX	134570597	134570762	*	+ 2 fold & sig. in E2	E2 vs DMSO	1.47967703068493	0.00669867515788419	Intron (ENST00000359237.9/10761, intron 2 of 2)	13433	ENSG00000227060	LINC00629	long intergenic non-protein coding RNA 629
chrX	137988569	137988781	*	+ 2 fold & sig. in E2	E2 vs DMSO	1.18501580613114	0.0431174727927754	Distal Intergenic	419764	ENSG00000156925	ZIC3	Zic family member 3
chrX	140343012	140343513	*	+ 2 fold & sig. in E2	E2 vs DMSO	1.33471682965905	0.00233278266122766	Distal Intergenic	-107635	NA	NA	NA
chrX	150224845	150225287	*	+ 2 fold & sig. in E2	E2 vs DMSO	1.44106680357965	0.0232146846320082	Downstream (<=300bp)	-2717	ENSG00000252454	MIR2114	microRNA 2114
chrX	154419826	154420545	*	+ 2 fold & sig. in E2	E2 vs DMSO	1.89112743095162	1.20354280535089e-05	Promoter	0	ENSG00000102125	TAFAZZIN	tafazzin, phospholipid-lysophospholipid transacylase
chrX	154649628	154650189	*	+ 2 fold & sig. in E2	E2 vs DMSO	1.76495826609354	0.00337713044966165	Distal Intergenic	3390	ENSG00000126890	CTAG2	cancer/testis antigen 2
chrX	155068217	155068484	*	+ 2 fold & sig. in E2	E2 vs DMSO	1.05025065377582	0.0219609663654594	Intron (ENST00000369484.8/100272147, intron 1 of 2)	2652	ENSG00000182712	CMC4	C-X9-C motif containing 4
chrX	16589263	16589687	*	+ 2 fold & sig. in E2	E2 vs DMSO	2.37771258017409	3.95192386958863e-05	3' UTR	1358	ENSG00000047230	CTPS2	CTP synthase 2
chrX	17414193	17414618	*	+ 2 fold & sig. in E2	E2 vs DMSO	1.61794256124263	0.00353822567122683	Intron (ENST00000676302.1/4810, intron 1 of 8)	-11263	ENSG00000265465	MIR4768	microRNA 4768
chrX	18836636	18836936	*	+ 2 fold & sig. in E2	E2 vs DMSO	2.2444575207189	7.32279393746335e-05	Distal Intergenic	-53360	NA	PHKA2-AS1	PHKA2 antisense RNA 1
chrX	20507981	20508247	*	+ 2 fold & sig. in E2	E2 vs DMSO	1.13023233594082	0.0339359106664399	Distal Intergenic	-240462	ENSG00000177189	RPS6KA3	ribosomal protein S6 kinase A3
chrX	30317378	30317800	*	+ 2 fold & sig. in E2	E2 vs DMSO	1.04969085036008	0.0446464939564206	Distal Intergenic	-7988	ENSG00000169297	NR0B1	nuclear receptor subfamily 0 group B member 1
chrX	37746692	37747123	*	+ 2 fold & sig. in E2	E2 vs DMSO	1.33905334717721	0.00276180303689383	Intron (ENST00000465127.1/7102, intron 3 of 8)	-32895	ENSG00000165168	CYBB	cytochrome b-245 beta chain
chrX	39619522	39620059	*	+ 2 fold & sig. in E2	E2 vs DMSO	1.60589648030339	0.000323036648420804	Distal Intergenic	-41157	ENSG00000263730	MIR3937	microRNA 3937
chrX	54748623	54748861	*	+ 2 fold & sig. in E2	E2 vs DMSO	1.1390806269754	0.00382426644417476	Distal Intergenic	39747	ENSG00000102313	ITIH6	inter-alpha-trypsin inhibitor heavy chain family member 6
chrX	68372593	68373090	*	+ 2 fold & sig. in E2	E2 vs DMSO	2.15470825925217	1.6632977410275e-05	Intron (ENST00000680612.1/4983, intron 2 of 19)	-36141	ENSG00000079482	OPHN1	oligophrenin 1
chrX	72621622	72622050	*	+ 2 fold & sig. in E2	E2 vs DMSO	1.05680690020739	0.00301229097267318	Intron (ENST00000373542.9/5255, intron 18 of 31)	-48521	ENSG00000147099	HDAC8	histone deacetylase 8
chrX	9269310	9269504	*	+ 2 fold & sig. in E2	E2 vs DMSO	2.02930869554606	0.00176026194837171	Intron (ENST00000432442.1/124905242, intron 1 of 1)	19390	NA	NA	NA
chr1	10018553	10019121	*	+ 2 fold & sig. in both	E2 vs DMSO	1.26944464177966	4.21792491866731e-05	Distal Intergenic	-13711	ENSG00000130939	UBE4B	ubiquitination factor E4B
chr1	107756410	107756926	*	+ 2 fold & sig. in both	E2 vs DMSO	1.14566650352874	0.000310354799545156	Intron (ENST00000370056.9/10451, intron 11 of 26)	-6902	ENSG00000134215	VAV3	vav guanine nucleotide exchange factor 3
chr1	108199137	108199605	*	+ 2 fold & sig. in both	E2 vs DMSO	1.11152859169787	6.60458648096955e-06	3' UTR	674	ENSG00000085491	SLC25A24	solute carrier family 25 member 24
chr1	108719954	108720197	*	+ 2 fold & sig. in both	E2 vs DMSO	1.19889811396374	0.0450981598553845	Intron (ENST00000370017.9/163479, intron 4 of 12)	-2214	ENSG00000143107	FNDC7	fibronectin type III domain containing 7
chr1	109137927	109138763	*	+ 2 fold & sig. in both	E2 vs DMSO	1.16529037023882	1.41710908691436e-05	Intron (ENST00000533147.5/57535, intron 2 of 2)	-22843	ENSG00000116299	ELAPOR1	endosome-lysosome associated apoptosis and autophagy regulator 1
chr1	109151175	109151994	*	+ 2 fold & sig. in both	E2 vs DMSO	1.01531937408688	2.11103271782265e-06	Intron (ENST00000533147.5/57535, intron 2 of 2)	-9612	ENSG00000116299	ELAPOR1	endosome-lysosome associated apoptosis and autophagy regulator 1
chr1	109246084	109246653	*	+ 2 fold & sig. in both	E2 vs DMSO	2.25178902562811	3.7889888848559e-09	Distal Intergenic	-2886	ENSG00000143126	CELSR2	cadherin EGF LAG seven-pass G-type receptor 2
chr1	111513180	111514061	*	+ 2 fold & sig. in both	E2 vs DMSO	2.17008139845596	1.36261120216801e-08	Intron (ENST00000369717.8/57413, intron 1 of 5)	-9547	ENSG00000121933	TMIGD3	transmembrane and immunoglobulin domain containing 3
chr1	115179355	115180011	*	+ 2 fold & sig. in both	E2 vs DMSO	1.06670198783851	5.38705712418493e-06	Distal Intergenic	79775	NA	LINC01765	long intergenic non-protein coding RNA 1765
chr1	115646915	115647333	*	+ 2 fold & sig. in both	E2 vs DMSO	1.03625092410606	0.0195352982560708	Intron (ENST00000355485.7/81839, intron 1 of 7)	-4069	ENSG00000173218	VANGL1	VANGL planar cell polarity protein 1
chr1	116008635	116009008	*	+ 2 fold & sig. in both	E2 vs DMSO	1.64103296786874	5.11470610233641e-06	Intron (ENST00000369503.9/55356, intron 2 of 11)	-23669	ENSG00000163393	SLC22A15	solute carrier family 22 member 15
chr1	117181467	117182227	*	+ 2 fold & sig. in both	E2 vs DMSO	1.1059502078913	0.000783257522333125	Intron (ENST00000369458.8/79679, intron 1 of 5)	-8201	ENSG00000134258	VTCN1	V-set domain containing T cell activation inhibitor 1
chr1	117780785	117781332	*	+ 2 fold & sig. in both	E2 vs DMSO	1.47561514923689	0.000310354799545156	Distal Intergenic	-92043	NA	NA	NA
chr1	12486371	12486881	*	+ 2 fold & sig. in both	E2 vs DMSO	1.28505710347693	0.000860299665832918	Intron (ENST00000620676.6/55187, intron 67 of 69)	7822	ENSG00000048707	VPS13D	vacuolar protein sorting 13 homolog D
chr1	144537325	144537762	*	+ 2 fold & sig. in both	E2 vs DMSO	1.58710460287028	8.24480913738086e-07	Distal Intergenic	-13304	NA	NA	NA
chr1	146396135	146396608	*	+ 2 fold & sig. in both	E2 vs DMSO	1.54082406547853	9.38472156398527e-08	Intron (ENST00000643391.1/112268274, intron 1 of 4)	5039	NA	LOC112268274	uncharacterized LOC112268274
chr1	147771284	147771563	*	+ 2 fold & sig. in both	E2 vs DMSO	1.05608701301868	0.028273696894022	Intron (ENST00000621517.1/2702, intron 1 of 1)	1791	ENSG00000265107	GJA5	gap junction protein alpha 5
chr1	14977151	14977809	*	+ 2 fold & sig. in both	E2 vs DMSO	1.20072574042808	1.57739040020404e-05	Intron (ENST00000636203.1/23254, intron 4 of 16)	31232	ENSG00000189337	KAZN	kazrin, periplakin interacting protein
chr1	158028806	158029336	*	+ 2 fold & sig. in both	E2 vs DMSO	1.10775248284162	0.014163385014857	Intron (ENST00000360089.8/55243, intron 1 of 12)	3256	NA	KIRREL1-IT1	KIRREL1 intronic transcript 1
chr1	162055087	162055557	*	+ 2 fold & sig. in both	E2 vs DMSO	1.10941529847274	0.000232446266629092	Distal Intergenic	-14134	ENSG00000198929	NOS1AP	nitric oxide synthase 1 adaptor protein
chr1	162115860	162116321	*	+ 2 fold & sig. in both	E2 vs DMSO	1.17763762260376	0.00578897814855608	Intron (ENST00000361897.10/9722, intron 1 of 9)	-40786	ENSG00000266144	MIR4654	microRNA 4654
chr1	162165530	162165879	*	+ 2 fold & sig. in both	E2 vs DMSO	1.23745320015749	8.74046115360347e-05	Intron (ENST00000361897.10/9722, intron 2 of 9)	8423	ENSG00000266144	MIR4654	microRNA 4654
chr1	162177250	162177526	*	+ 2 fold & sig. in both	E2 vs DMSO	1.10098944558375	0.0244354050104949	Intron (ENST00000361897.10/9722, intron 2 of 9)	-2007	NA	LOC105371475	uncharacterized LOC105371475
chr1	164748168	164748950	*	+ 2 fold & sig. in both	E2 vs DMSO	1.3477598796148	8.92239470182593e-07	Intron (ENST00000420696.7/5087, intron 2 of 8)	-23962	ENSG00000185630	PBX1	PBX homeobox 1
chr1	17029335	17029902	*	+ 2 fold & sig. in both	E2 vs DMSO	1.50017131631915	3.95192386958863e-05	Intron (ENST00000375499.8/6390, intron 3 of 7)	-6175	ENSG00000117118	SDHB	succinate dehydrogenase complex iron sulfur subunit B
chr1	17314658	17315131	*	+ 2 fold & sig. in both	E2 vs DMSO	2.34930059554265	3.2167933128092e-07	Intron (ENST00000375453.5/23569, intron 1 of 3)	6461	ENSG00000159339	PADI4	peptidyl arginine deiminase 4
chr1	17529319	17530193	*	+ 2 fold & sig. in both	E2 vs DMSO	1.19280586168853	3.13875287790571e-07	Distal Intergenic	-9505	ENSG00000074964	ARHGEF10L	Rho guanine nucleotide exchange factor 10 like
chr1	17561587	17562016	*	+ 2 fold & sig. in both	E2 vs DMSO	1.13441539428891	0.00126313990796207	Intron (ENST00000361221.8/55160, intron 1 of 28)	-18537	ENSG00000074964	ARHGEF10L	Rho guanine nucleotide exchange factor 10 like
chr1	17666014	17666440	*	+ 2 fold & sig. in both	E2 vs DMSO	1.10523046494504	0.00877065696168256	Intron (ENST00000361221.8/55160, intron 26 of 28)	26261	ENSG00000074964	ARHGEF10L	Rho guanine nucleotide exchange factor 10 like
chr1	177448655	177449342	*	+ 2 fold & sig. in both	E2 vs DMSO	1.44053690901961	6.60458648096955e-06	Intron (ENST00000701603.1/102724661, intron 3 of 3)	97075	ENSG00000224968	LINC01645	long intergenic non-protein coding RNA 1645
chr1	1793204	1793853	*	+ 2 fold & sig. in both	E2 vs DMSO	1.44325435832276	2.23204444834999e-06	Promoter	344	ENSG00000078369	GNB1	G protein subunit beta 1
chr1	180228548	180228927	*	+ 2 fold & sig. in both	E2 vs DMSO	1.73447319835966	2.23956952673192e-06	Distal Intergenic	-1337	ENSG00000121454	LHX4	LIM homeobox 4
chr1	182315166	182315622	*	+ 2 fold & sig. in both	E2 vs DMSO	1.09581166583935	0.000388087100326776	Intron (ENST00000702781.1/400799, intron 1 of 2)	-1105	NA	LINC01344	long intergenic non-protein coding RNA 1344
chr1	184373030	184373554	*	+ 2 fold & sig. in both	E2 vs DMSO	1.47222105050616	2.77414624648222e-06	Distal Intergenic	13150	NA	C1orf21-DT	C1orf21 divergent transcript
chr1	184626415	184627247	*	+ 2 fold & sig. in both	E2 vs DMSO	1.32501197046398	3.13267353099589e-06	3' UTR	3192	NA	LOC107985236	uncharacterized LOC107985236
chr1	184632526	184633269	*	+ 2 fold & sig. in both	E2 vs DMSO	1.00884913252064	5.18432297755419e-05	Intron (ENST00000660403.1/107985236, intron 2 of 3)	-2087	NA	LOC107985236	uncharacterized LOC107985236
chr1	184635300	184635846	*	+ 2 fold & sig. in both	E2 vs DMSO	1.17048706180479	1.98126892548575e-05	Exon (ENST00000657103.1/124904468, exon 5 of 5)	-4861	NA	LOC107985236	uncharacterized LOC107985236
chr1	186231683	186232694	*	+ 2 fold & sig. in both	E2 vs DMSO	1.85490683224663	6.31630106192463e-09	Distal Intergenic	7211	NA	NA	NA
chr1	189719615	189720075	*	+ 2 fold & sig. in both	E2 vs DMSO	1.31692704835494	0.000470602371469774	Distal Intergenic	-55390	ENSG00000232212	LINC01701	long intergenic non-protein coding RNA 1701
chr1	200016687	200017449	*	+ 2 fold & sig. in both	E2 vs DMSO	2.52869685381346	3.29550057830941e-09	Distal Intergenic	-10165	ENSG00000116833	NR5A2	nuclear receptor subfamily 5 group A member 2
chr1	200337111	200337511	*	+ 2 fold & sig. in both	E2 vs DMSO	1.27807425805251	0.00888157354171245	Intron (ENST00000637430.1/124904480, intron 1 of 5)	3918	NA	NA	NA
chr1	201352999	201353804	*	+ 2 fold & sig. in both	E2 vs DMSO	1.45097641267845	1.33559128560852e-07	Distal Intergenic	7553	ENSG00000118194	TNNT2	troponin T2, cardiac type
chr1	201495323	201495814	*	+ 2 fold & sig. in both	E2 vs DMSO	1.29339799250654	0.000139617602536379	Promoter	487	ENSG00000159176	CSRP1	cysteine and glycine rich protein 1
chr1	202112557	202113882	*	+ 2 fold & sig. in both	E2 vs DMSO	1.36998371646348	1.56130124742765e-08	Distal Intergenic	-9004	ENSG00000170075	GPR37L1	G protein-coupled receptor 37 like 1
chr1	202131993	202132987	*	+ 2 fold & sig. in both	E2 vs DMSO	1.02722099079472	2.23956952673192e-06	3' UTR	2621	ENSG00000143862	ARL8A	ADP ribosylation factor like GTPase 8A
chr1	202531987	202532573	*	+ 2 fold & sig. in both	E2 vs DMSO	1.57376477220554	9.29535964152557e-06	Intron (ENST00000608999.6/4660, intron 18 of 23)	-4560	NA	NA	NA
chr1	203089072	203089938	*	+ 2 fold & sig. in both	E2 vs DMSO	2.15565425498491	1.5725061905176e-09	Promoter	-716	ENSG00000163485	ADORA1	adenosine A1 receptor
chr1	203184866	203185439	*	+ 2 fold & sig. in both	E2 vs DMSO	1.29998326637126	0.0268158510208683	Exon (ENST00000255409.8/1116, exon 3 of 10)	1265	ENSG00000133048	CHI3L1	chitinase 3 like 1
chr1	203519208	203519916	*	+ 2 fold & sig. in both	E2 vs DMSO	1.35632579185732	9.1875413630337e-08	Distal Intergenic	23238	ENSG00000188770	OPTC	opticin
chr1	205894955	205895283	*	+ 2 fold & sig. in both	E2 vs DMSO	1.1795580687451	0.00439767182312729	Exon (ENST00000656763.1/284581, exon 3 of 3)	4908	NA	LOC284581	uncharacterized LOC284581
chr1	206843535	206844153	*	+ 2 fold & sig. in both	E2 vs DMSO	1.70043614362345	5.38705712418493e-06	Distal Intergenic	6872	ENSG00000142224	IL19	interleukin 19
chr1	206903580	206904152	*	+ 2 fold & sig. in both	E2 vs DMSO	1.79843985533401	3.55106926415016e-07	3' UTR	5747	ENSG00000162892	IL24	interleukin 24
chr1	209546394	209546755	*	+ 2 fold & sig. in both	E2 vs DMSO	1.78831826092199	1.18501976712364e-05	Intron (ENST00000424696.6/105372898, intron 2 of 6)	825	NA	LOC105372898	uncharacterized LOC105372898
chr1	212077972	212078391	*	+ 2 fold & sig. in both	E2 vs DMSO	1.39900559398101	2.06352938032893e-05	Promoter	359	ENSG00000264358	MIR3122	microRNA 3122
chr1	212138381	212139057	*	+ 2 fold & sig. in both	E2 vs DMSO	1.7650654325738	4.50295844897873e-08	Distal Intergenic	37735	ENSG00000143476	DTL	denticleless E3 ubiquitin protein ligase homolog
chr1	21241621	21242096	*	+ 2 fold & sig. in both	E2 vs DMSO	1.95822874977594	5.61702514956744e-08	Intron (ENST00000415912.6/1889, intron 10 of 18)	-3271	ENSG00000117298	ECE1	endothelin converting enzyme 1
chr1	21268222	21268966	*	+ 2 fold & sig. in both	E2 vs DMSO	1.40459496522106	6.66186163964615e-07	Intron (ENST00000415912.6/1889, intron 4 of 18)	2140	NA	NA	NA
chr1	223212508	223212976	*	+ 2 fold & sig. in both	E2 vs DMSO	1.07681345573991	0.000240208000702443	Distal Intergenic	16474	ENSG00000143502	SUSD4	sushi domain containing 4
chr1	224212563	224213107	*	+ 2 fold & sig. in both	E2 vs DMSO	1.46406000745493	0.000710435732366788	Promoter	172	ENSG00000232628	LOC101927143	uncharacterized LOC101927143
chr1	2243344	2243812	*	+ 2 fold & sig. in both	E2 vs DMSO	1.15930058599399	0.000344181874043478	Intron (ENST00000704337.1/6497, intron 1 of 3)	-4184	ENSG00000157933	SKI	SKI proto-oncogene
chr1	22472517	22473254	*	+ 2 fold & sig. in both	E2 vs DMSO	1.59645692326185	3.2167933128092e-07	Intron (ENST00000650433.1/9923, intron 1 of 8)	20650	ENSG00000184677	ZBTB40	zinc finger and BTB domain containing 40
chr1	229148063	229148551	*	+ 2 fold & sig. in both	E2 vs DMSO	1.82309994395045	5.49575155242873e-06	Intron (ENST00000662083.1/105373158, intron 1 of 4)	35544	NA	LINC02815	long intergenic non-protein coding RNA 2815
chr1	229164837	229165804	*	+ 2 fold & sig. in both	E2 vs DMSO	1.48697029325291	1.07543223266133e-06	Intron (ENST00000662083.1/105373158, intron 1 of 4)	18291	NA	LINC02815	long intergenic non-protein coding RNA 2815
chr1	232192866	232193427	*	+ 2 fold & sig. in both	E2 vs DMSO	1.01512805965622	0.000568266423787608	Distal Intergenic	209339	ENSG00000116991	SIPA1L2	signal induced proliferation associated 1 like 2
chr1	23394073	23394525	*	+ 2 fold & sig. in both	E2 vs DMSO	2.09012025672405	2.91130066919402e-06	Intron (ENST00000450454.7/6920, intron 7 of 10)	23773	ENSG00000204219	TCEA3	transcription elongation factor A3
chr1	234553053	234553424	*	+ 2 fold & sig. in both	E2 vs DMSO	2.10431088600634	4.61465248275227e-06	Exon (ENST00000664950.1/ENST00000664950.1, exon 2 of 2)	-21250	ENSG00000231768	LINC01354	long intergenic non-protein coding RNA 1354
chr1	234876214	234877075	*	+ 2 fold & sig. in both	E2 vs DMSO	1.17457400186194	1.04030752249823e-05	Intron (ENST00000651370.1/107985365, intron 1 of 1)	55578	NA	LOC107985365	uncharacterized LOC107985365
chr1	236905115	236905596	*	+ 2 fold & sig. in both	E2 vs DMSO	1.00771998146468	0.00374237437853163	Intron (ENST00000650888.1/4548, intron 31 of 32)	6592	NA	LOC105373218	uncharacterized LOC105373218
chr1	24001297	24001590	*	+ 2 fold & sig. in both	E2 vs DMSO	1.19074694834197	0.0088346127409612	Distal Intergenic	-20370	ENSG00000188529	SRSF10	serine and arginine rich splicing factor 10
chr1	241391924	241392380	*	+ 2 fold & sig. in both	E2 vs DMSO	1.17832513689767	0.000242754231491165	Distal Intergenic	34462	NA	NA	NA
chr1	24570421	24570802	*	+ 2 fold & sig. in both	E2 vs DMSO	1.11229056620611	0.000217252887836729	Intron (ENST00000374392.3/400746, intron 1 of 3)	14334	ENSG00000184454	NCMAP	non-compact myelin associated protein
chr1	245802966	245803506	*	+ 2 fold & sig. in both	E2 vs DMSO	1.03050031742229	0.000855260828949042	Intron (ENST00000366516.5/64754, intron 5 of 6)	10905	ENSG00000185420	SMYD3	SET and MYND domain containing 3
chr1	25476129	25476804	*	+ 2 fold & sig. in both	E2 vs DMSO	2.30845528115068	3.39729285769269e-08	Intron (ENST00000399766.7/55219, intron 4 of 8)	27236	ENSG00000204178	MACO1	macoilin 1
chr1	25708154	25708669	*	+ 2 fold & sig. in both	E2 vs DMSO	1.31187080599711	0.000383126264167141	Promoter	-933	ENSG00000117643	MAN1C1	mannosidase alpha class 1C member 1
chr1	30302842	30303465	*	+ 2 fold & sig. in both	E2 vs DMSO	1.57324270924966	1.44848409508607e-06	Distal Intergenic	-265230	ENSG00000233399	LINC01648	long intergenic non-protein coding RNA 1648
chr1	30461496	30462148	*	+ 2 fold & sig. in both	E2 vs DMSO	1.21410385705612	6.93398821701317e-05	Distal Intergenic	253987	ENSG00000162510	MATN1	matrilin 1
chr1	31830134	31831130	*	+ 2 fold & sig. in both	E2 vs DMSO	1.60632283439324	1.3194055166556e-06	Distal Intergenic	-14112	ENSG00000134668	SPOCD1	SPOC domain containing 1
chr1	31842701	31843312	*	+ 2 fold & sig. in both	E2 vs DMSO	1.27560695963297	0.000343567943334033	Exon (ENST00000453837.1/ENST00000453837.1, exon 2 of 2)	-26679	ENSG00000134668	SPOCD1	SPOC domain containing 1
chr1	34825593	34826049	*	+ 2 fold & sig. in both	E2 vs DMSO	1.12640749892317	0.00024099568405516	Intron (ENST00000426886.1/105378642, intron 2 of 4)	32594	ENSG00000187513	GJA4	gap junction protein alpha 4
chr1	40923702	40923949	*	+ 2 fold & sig. in both	E2 vs DMSO	1.0378571651876	0.00327319673432031	Distal Intergenic	-55351	ENSG00000171793	CTPS1	CTP synthase 1
chr1	41783155	41783661	*	+ 2 fold & sig. in both	E2 vs DMSO	1.23596847289724	7.48837852701731e-05	Intron (ENST00000372584.5/59269, intron 1 of 7)	85969	ENSG00000127124	HIVEP3	HIVEP zinc finger 3
chr1	41789584	41790371	*	+ 2 fold & sig. in both	E2 vs DMSO	1.52487689092949	6.3794318341315e-08	Intron (ENST00000372584.5/59269, intron 1 of 7)	79259	ENSG00000127124	HIVEP3	HIVEP zinc finger 3
chr1	41868058	41868862	*	+ 2 fold & sig. in both	E2 vs DMSO	1.17752302417255	4.9327120616309e-06	Intron (ENST00000372584.5/59269, intron 1 of 7)	768	ENSG00000127124	HIVEP3	HIVEP zinc finger 3
chr1	42993523	42993980	*	+ 2 fold & sig. in both	E2 vs DMSO	1.32415359577146	3.08636597772242e-05	Intron (ENST00000653200.1/440584, intron 3 of 3)	34423	ENSG00000227533	SLC2A1-DT	SLC2A1 divergent transcript
chr1	47894616	47895412	*	+ 2 fold & sig. in both	E2 vs DMSO	1.05714367686759	6.12301915409748e-06	Intron (ENST00000606738.3/388630, intron 2 of 6)	98800	ENSG00000269113	TRABD2B	TraB domain containing 2B
chr1	51541565	51542418	*	+ 2 fold & sig. in both	E2 vs DMSO	1.80128325400898	3.82652373552432e-07	Intron (ENST00000702775.1/105378720, intron 1 of 2)	-22237	ENSG00000085832	EPS15	epidermal growth factor receptor pathway substrate 15
chr1	5312859	5313305	*	+ 2 fold & sig. in both	E2 vs DMSO	1.60565058777899	0.000182090894428113	Distal Intergenic	179499	ENSG00000284692	LOC105376686	uncharacterized LOC105376686
chr1	61215708	61216298	*	+ 2 fold & sig. in both	E2 vs DMSO	1.15367046508465	0.000127263558724087	Intron (ENST00000371191.5/4774, intron 2 of 10)	12185	ENSG00000162599	NFIA	nuclear factor I A
chr1	64878910	64879510	*	+ 2 fold & sig. in both	E2 vs DMSO	2.18475807154342	4.63012521110446e-07	3' UTR	-9502	ENSG00000162434	JAK1	Janus kinase 1
chr1	65044191	65044989	*	+ 2 fold & sig. in both	E2 vs DMSO	1.45844280014878	3.95136041252755e-08	5' UTR	12853	ENSG00000265996	MIR3671	microRNA 3671
chr1	7106685	7107185	*	+ 2 fold & sig. in both	E2 vs DMSO	1.03563899640006	0.00866999230224241	Intron (ENST00000303635.12/23261, intron 4 of 22)	232629	ENSG00000171735	CAMTA1	calmodulin binding transcription activator 1
chr1	7223528	7224364	*	+ 2 fold & sig. in both	E2 vs DMSO	1.46041972133255	5.31257878138687e-07	Intron (ENST00000303635.12/23261, intron 4 of 22)	-144578	ENSG00000171735	CAMTA1	calmodulin binding transcription activator 1
chr1	7447101	7447458	*	+ 2 fold & sig. in both	E2 vs DMSO	1.50413997153202	1.47335999957802e-06	Intron (ENST00000303635.12/23261, intron 5 of 22)	-5547	NA	CAMTA1-AS1	CAMTA1 antisense RNA 1
chr1	7447636	7448463	*	+ 2 fold & sig. in both	E2 vs DMSO	1.91648926282883	2.02431375520302e-09	Intron (ENST00000303635.12/23261, intron 5 of 22)	-6082	NA	CAMTA1-AS1	CAMTA1 antisense RNA 1
chr1	74652441	74653243	*	+ 2 fold & sig. in both	E2 vs DMSO	1.57064567268863	5.02899728092513e-08	Intron (ENST00000326665.10/127254, intron 1 of 14)	-17586	ENSG00000178965	ERICH3	glutamate rich 3
chr1	79345198	79345520	*	+ 2 fold & sig. in both	E2 vs DMSO	1.22449694578377	0.011376375547229	Exon (ENST00000645557.1/107983999, exon 2 of 2)	20190	NA	LINC02792	long intergenic non-protein coding RNA 2792
chr1	79392311	79392846	*	+ 2 fold & sig. in both	E2 vs DMSO	1.54893305681021	0.00184639766629995	Distal Intergenic	67303	NA	LINC02792	long intergenic non-protein coding RNA 2792
chr1	82386561	82387228	*	+ 2 fold & sig. in both	E2 vs DMSO	1.27616010361884	0.000134132886353379	Intron (ENST00000653483.1/ENST00000653483.1, intron 4 of 4)	168323	NA	NA	NA
chr1	84759778	84760121	*	+ 2 fold & sig. in both	E2 vs DMSO	1.33986933037669	0.000240184827458596	Distal Intergenic	-68975	ENSG00000117155	SSX2IP	SSX family member 2 interacting protein
chr1	85504062	85504791	*	+ 2 fold & sig. in both	E2 vs DMSO	2.17611244767431	1.07760523503959e-07	Intron (ENST00000426972.8/23576, intron 1 of 6)	-7781	ENSG00000153904	DDAH1	dimethylarginine dimethylaminohydrolase 1
chr1	85550756	85551551	*	+ 2 fold & sig. in both	E2 vs DMSO	1.17045958630328	9.92607769518599e-06	Intron (ENST00000426972.8/23576, intron 1 of 6)	25307	NA	NA	NA
chr1	9038287	9038661	*	+ 2 fold & sig. in both	E2 vs DMSO	1.08880581765956	0.0467040270744978	Exon (ENST00000377424.9/6518, exon 10 of 12)	1234	ENSG00000142583	SLC2A5	solute carrier family 2 member 5
chr1	9302982	9303453	*	+ 2 fold & sig. in both	E2 vs DMSO	1.59125347870589	1.16732388996757e-06	Intron (ENST00000328089.11/80176, intron 1 of 2)	8454	ENSG00000171621	SPSB1	splA/ryanodine receptor domain and SOCS box containing 1
chr10	100006177	100006677	*	+ 2 fold & sig. in both	E2 vs DMSO	1.21031763176837	0.000192848942988187	Intron (ENST00000324109.9/23268, intron 1 of 16)	3270	ENSG00000107554	DNMBP	dynamin binding protein
chr10	101052229	101052620	*	+ 2 fold & sig. in both	E2 vs DMSO	1.08692984716801	7.63662748017122e-05	Distal Intergenic	-9369	ENSG00000107821	KAZALD1	Kazal type serine peptidase inhibitor domain 1
chr10	102710630	102711134	*	+ 2 fold & sig. in both	E2 vs DMSO	1.74890649834704	2.89823493183121e-08	Intron (ENST00000260746.6/403, intron 1 of 5)	3263	ENSG00000138175	ARL3	ADP ribosylation factor like GTPase 3
chr10	111107755	111108217	*	+ 2 fold & sig. in both	E2 vs DMSO	1.64451287099793	7.05451476127246e-06	Distal Intergenic	30726	ENSG00000150594	ADRA2A	adrenoceptor alpha 2A
chr10	113921767	113922386	*	+ 2 fold & sig. in both	E2 vs DMSO	2.89395542377252	6.31630106192463e-09	Distal Intergenic	66943	ENSG00000196865	NHLRC2	NHL repeat containing 2
chr10	114078404	114078782	*	+ 2 fold & sig. in both	E2 vs DMSO	1.43133911226398	0.000310150777737097	Distal Intergenic	34538	ENSG00000043591	ADRB1	adrenoceptor beta 1
chr10	119317425	119317866	*	+ 2 fold & sig. in both	E2 vs DMSO	1.30627233860645	3.72767386737732e-06	Intron (ENST00000392870.3/2869, intron 1 of 15)	18091	NA	LOC105378511	uncharacterized LOC105378511
chr10	12150218	12150699	*	+ 2 fold & sig. in both	E2 vs DMSO	1.09581900522652	0.000344181874043478	Promoter	362	ENSG00000065665	SEC61A2	SEC61 translocon subunit alpha 2
chr10	122183104	122183551	*	+ 2 fold & sig. in both	E2 vs DMSO	1.26024518712154	0.00143326539722304	Intron (ENST00000369005.6/10579, intron 7 of 22)	-8897	ENSG00000138162	TACC2	transforming acidic coiled-coil containing protein 2
chr10	123129549	123130028	*	+ 2 fold & sig. in both	E2 vs DMSO	1.18403167470144	0.00262742682773381	Distal Intergenic	-5942	ENSG00000188620	HMX3	H6 family homeobox 3
chr10	123721421	123722378	*	+ 2 fold & sig. in both	E2 vs DMSO	2.3140210292628	1.36261120216801e-08	Intron (ENST00000368854.7/119587, intron 15 of 19)	-54292	NA	LOC105378533	uncharacterized LOC105378533
chr10	123751107	123751723	*	+ 2 fold & sig. in both	E2 vs DMSO	1.3287528413422	6.00509957787233e-05	Intron (ENST00000368854.7/119587, intron 15 of 19)	-24947	NA	LOC105378533	uncharacterized LOC105378533
chr10	124386055	124386673	*	+ 2 fold & sig. in both	E2 vs DMSO	1.45580485910872	2.46061859505366e-05	Distal Intergenic	16663	ENSG00000065154	OAT	ornithine aminotransferase
chr10	126059502	126059739	*	+ 2 fold & sig. in both	E2 vs DMSO	1.26602762217546	0.00363038269784675	Intron (ENST00000368679.8/8038, intron 14 of 22)	7267	ENSG00000148848	ADAM12	ADAM metallopeptidase domain 12
chr10	126935412	126936090	*	+ 2 fold & sig. in both	E2 vs DMSO	1.22336701470959	5.91511719756854e-05	Intron (ENST00000280333.9/1793, intron 1 of 51)	29984	ENSG00000150760	DOCK1	dedicator of cytokinesis 1
chr10	129036734	129037506	*	+ 2 fold & sig. in both	E2 vs DMSO	1.11306129639118	0.00029438249117917	Promoter	0	NA	NA	NA
chr10	132764087	132764474	*	+ 2 fold & sig. in both	E2 vs DMSO	1.15664185387731	0.010968746991609	Intron (ENST00000368594.8/3632, intron 11 of 15)	-1350	ENSG00000068383	INPP5A	inositol polyphosphate-5-phosphatase A
chr10	17239140	17239694	*	+ 2 fold & sig. in both	E2 vs DMSO	1.36491917874918	0.000943719566860287	Distal Intergenic	5915	ENSG00000026025	VIM	vimentin
chr10	19221373	19221712	*	+ 2 fold & sig. in both	E2 vs DMSO	1.01577758598529	0.049880486840568	Intron (ENST00000454679.7/340895, intron 18 of 39)	17523	ENSG00000204740	MALRD1	MAM and LDL receptor class A domain containing 1
chr10	19904036	19904764	*	+ 2 fold & sig. in both	E2 vs DMSO	1.11231392460479	8.61626595629328e-06	Intron (ENST00000377242.7/84898, intron 1 of 12)	87604	ENSG00000120594	PLXDC2	plexin domain containing 2
chr10	21630295	21630965	*	+ 2 fold & sig. in both	E2 vs DMSO	1.81150260504513	0.000190933865201723	Intron (ENST00000631589.1/8028, intron 8 of 22)	5604	ENSG00000078403	MLLT10	MLLT10 histone lysine methyltransferase DOT1L cofactor
chr10	22482287	22482680	*	+ 2 fold & sig. in both	E2 vs DMSO	1.0673207178159	0.0239213904304757	Distal Intergenic	-4261	NA	NA	NA
chr10	28256730	28257295	*	+ 2 fold & sig. in both	E2 vs DMSO	1.53766252655398	6.7514024620515e-07	Intron (ENST00000337532.9/143098, intron 1 of 17)	-17993	ENSG00000150054	MPP7	membrane palmitoylated protein 7
chr10	28925382	28925848	*	+ 2 fold & sig. in both	E2 vs DMSO	2.53767128721896	4.69545856597333e-08	Intron (ENST00000646289.1/101929218, intron 3 of 7)	49784	ENSG00000232624	C10orf126	chromosome 10 open reading frame 126
chr10	32651560	32651919	*	+ 2 fold & sig. in both	E2 vs DMSO	1.31861253268819	0.00669153460705456	Intron (ENST00000639629.2/79741, intron 21 of 43)	-34100	ENSG00000216937	CCDC7	coiled-coil domain containing 7
chr10	338940	339605	*	+ 2 fold & sig. in both	E2 vs DMSO	1.34341230266863	4.02394444280809e-07	Intron (ENST00000381496.7/22982, intron 28 of 35)	-9414	ENSG00000151240	DIP2C	disco interacting protein 2 homolog C
chr10	4127742	4128334	*	+ 2 fold & sig. in both	E2 vs DMSO	1.17287961465727	0.00013997293137587	Distal Intergenic	76016	ENSG00000236990	LOC101927964	uncharacterized LOC101927964
chr10	43025895	43026850	*	+ 2 fold & sig. in both	E2 vs DMSO	1.38967498290468	7.94103596316659e-08	Distal Intergenic	28332	ENSG00000263795	MIR5100	microRNA 5100
chr10	43068885	43069546	*	+ 2 fold & sig. in both	E2 vs DMSO	1.21719380484167	0.00770712623715569	Distal Intergenic	-7518	ENSG00000165731	RET	ret proto-oncogene
chr10	43110695	43111177	*	+ 2 fold & sig. in both	E2 vs DMSO	1.95639165985786	2.31417654767506e-07	Intron (ENST00000671844.1/5979, intron 3 of 15)	1488	ENSG00000165731	RET	ret proto-oncogene
chr10	44173321	44174110	*	+ 2 fold & sig. in both	E2 vs DMSO	1.21319648017634	2.21900514450825e-05	Distal Intergenic	-118459	ENSG00000277288	LINC02881	long intergenic non-protein coding RNA 2881
chr10	48813933	48814528	*	+ 2 fold & sig. in both	E2 vs DMSO	1.90271734654686	6.56171036126482e-07	Exon (ENST00000325239.12/57705, exon 31 of 62)	11195	ENSG00000128815	WDFY4	WDFY family member 4
chr10	5115887	5116345	*	+ 2 fold & sig. in both	E2 vs DMSO	1.58042793519381	0.00106578064440443	Distal Intergenic	10612	ENSG00000196139	AKR1C3	aldo-keto reductase family 1 member C3
chr10	517278	517599	*	+ 2 fold & sig. in both	E2 vs DMSO	1.61358563991826	5.12258193053771e-05	Intron (ENST00000280886.12/22982, intron 1 of 36)	-30720	ENSG00000151240	DIP2C	disco interacting protein 2 homolog C
chr10	5632298	5632830	*	+ 2 fold & sig. in both	E2 vs DMSO	1.39402785607492	9.85220721788264e-06	Promoter	0	ENSG00000242147	LINC02677	long intergenic non-protein coding RNA 2677
chr10	5659674	5660646	*	+ 2 fold & sig. in both	E2 vs DMSO	1.65403086458823	2.52034888617612e-09	Intron (ENST00000357700.11/79754, intron 1 of 5)	5932	ENSG00000196372	ASB13	ankyrin repeat and SOCS box containing 13
chr10	60848138	60849088	*	+ 2 fold & sig. in both	E2 vs DMSO	2.17729070615236	7.76824288020847e-09	Distal Intergenic	22579	ENSG00000072422	RHOBTB1	Rho related BTB domain containing 1
chr10	6279498	6279921	*	+ 2 fold & sig. in both	E2 vs DMSO	1.08973373743501	0.00182133787807406	Intron (ENST00000659311.1/399715, intron 1 of 4)	1811	ENSG00000215244	LINC02649	long intergenic non-protein coding RNA 2649
chr10	69641296	69641788	*	+ 2 fold & sig. in both	E2 vs DMSO	1.05327701835983	0.000214992933488677	Distal Intergenic	10752	ENSG00000171224	FAM241B	family with sequence similarity 241 member B
chr10	74655739	74656129	*	+ 2 fold & sig. in both	E2 vs DMSO	1.02140861978771	0.0389551478393906	Exon (ENST00000398689.2/ENST00000398689.2, exon 1 of 1)	-125186	NA	LOC102723439	uncharacterized LOC102723439
chr10	77513789	77514084	*	+ 2 fold & sig. in both	E2 vs DMSO	1.24047737833181	0.0291350741310596	Intron (ENST00000639601.1/3778, intron 1 of 27)	-14819	ENSG00000156113	KCNMA1	potassium calcium-activated channel subfamily M alpha 1
chr10	77872129	77872987	*	+ 2 fold & sig. in both	E2 vs DMSO	1.85589866766577	1.57805015265382e-08	Intron (ENST00000372391.7/9231, intron 1 of 31)	-2938	ENSG00000151208	DLG5	discs large MAGUK scaffold protein 5
chr10	778894	779454	*	+ 2 fold & sig. in both	E2 vs DMSO	1.11754218920791	0.000207119994850126	Distal Intergenic	36261	ENSG00000107929	LARP4B	La ribonucleoprotein 4B
chr10	78514955	78515468	*	+ 2 fold & sig. in both	E2 vs DMSO	1.17423667494752	0.000887714627312722	Intron (ENST00000634930.1/105378375, intron 2 of 3)	213296	NA	NA	NA
chr10	7868048	7868687	*	+ 2 fold & sig. in both	E2 vs DMSO	1.52743706088275	0.000131712090943436	Intron (ENST00000687671.1/83860, intron 2 of 3)	49520	ENSG00000165632	TAF3	TATA-box binding protein associated factor 3
chr10	78977706	78978323	*	+ 2 fold & sig. in both	E2 vs DMSO	1.71492172563902	6.81104006344228e-08	Intron (ENST00000456353.5/283050, intron 5 of 9)	-15312	ENSG00000224596	ZMIZ1-AS1	ZMIZ1 antisense RNA 1
chr10	79128500	79129261	*	+ 2 fold & sig. in both	E2 vs DMSO	1.26360933602869	1.75718815362982e-05	Intron (ENST00000334512.10/57178, intron 2 of 24)	59534	ENSG00000108175	ZMIZ1	zinc finger MIZ-type containing 1
chr10	79282324	79282882	*	+ 2 fold & sig. in both	E2 vs DMSO	1.1091260588779	0.00071820946388149	Intron (ENST00000334512.10/57178, intron 8 of 24)	5145	ENSG00000108175	ZMIZ1	zinc finger MIZ-type containing 1
chr10	79316769	79316998	*	+ 2 fold & sig. in both	E2 vs DMSO	1.03922488934838	0.0492492986427985	Downstream (<=300bp)	-30471	ENSG00000108179	PPIF	peptidylprolyl isomerase F
chr10	79342160	79342600	*	+ 2 fold & sig. in both	E2 vs DMSO	1.36820052345269	5.6019761618175e-05	Distal Intergenic	-4869	ENSG00000108179	PPIF	peptidylprolyl isomerase F
chr10	79508132	79508546	*	+ 2 fold & sig. in both	E2 vs DMSO	1.20551260986309	0.00335517465471178	Intron (ENST00000538322.2/729815, intron 2 of 2)	2014	ENSG00000235705	LOC729815	uncharacterized LOC729815
chr10	7966968	7967419	*	+ 2 fold & sig. in both	E2 vs DMSO	1.24810116500002	0.000170256611807219	Intron (ENST00000687671.1/83860, intron 3 of 3)	-77959	ENSG00000107485	GATA3	GATA binding protein 3
chr10	80290856	80291342	*	+ 2 fold & sig. in both	E2 vs DMSO	1.11414679685091	0.0047790955889738	Distal Intergenic	-1198	ENSG00000151224	MAT1A	methionine adenosyltransferase 1A
chr10	86403103	86403464	*	+ 2 fold & sig. in both	E2 vs DMSO	1.00123598977278	0.00488265023312262	Promoter	0	NA	NA	NA
chr10	8752227	8752884	*	+ 2 fold & sig. in both	E2 vs DMSO	1.42553777025602	6.07862583925153e-06	Distal Intergenic	-145105	ENSG00000234752	LINC02676	long intergenic non-protein coding RNA 2676
chr10	87657398	87657788	*	+ 2 fold & sig. in both	E2 vs DMSO	1.86246366757921	2.20164298734156e-06	Intron (ENST00000438082.1/ENST00000438082.1, intron 2 of 3)	-1825	ENSG00000198682	PAPSS2	3'-phosphoadenosine 5'-phosphosulfate synthase 2
chr10	88385505	88385889	*	+ 2 fold & sig. in both	E2 vs DMSO	1.13497076591387	0.00191594566940114	Intron (ENST00000371947.7/55328, intron 4 of 6)	197301	ENSG00000184719	RNLS	renalase, FAD dependent amine oxidase
chr10	93435034	93435695	*	+ 2 fold & sig. in both	E2 vs DMSO	1.21652987965061	5.48833188227042e-07	Intron (ENST00000359263.9/26509, intron 3 of 53)	46499	ENSG00000138119	MYOF	myoferlin
chr10	98296015	98296278	*	+ 2 fold & sig. in both	E2 vs DMSO	1.01945431992541	0.0164169793062276	Distal Intergenic	-27821	ENSG00000138131	LOXL4	lysyl oxidase like 4
chr11	100692448	100692809	*	+ 2 fold & sig. in both	E2 vs DMSO	1.75094453150533	6.31980545545528e-05	Intron (ENST00000298815.13/143872, intron 1 of 23)	-4493	ENSG00000248027	ARHGAP42-AS1	ARHGAP42 antisense RNA 1
chr11	100980887	100981646	*	+ 2 fold & sig. in both	E2 vs DMSO	1.41681204124987	9.54358562741763e-05	Intron (ENST00000298815.13/143872, intron 22 of 23)	21037	ENSG00000165895	ARHGAP42	Rho GTPase activating protein 42
chr11	101033985	101034534	*	+ 2 fold & sig. in both	E2 vs DMSO	2.04645597648124	3.39729285769269e-08	3' UTR	16936	ENSG00000082175	PGR	progesterone receptor
chr11	101078447	101078982	*	+ 2 fold & sig. in both	E2 vs DMSO	1.69069850406199	7.5775872706801e-06	Intron (ENST00000325455.10/5241, intron 3 of 7)	-14422	ENSG00000082175	PGR	progesterone receptor
chr11	101091707	101092138	*	+ 2 fold & sig. in both	E2 vs DMSO	1.14740103638109	0.00089284001911301	Exon (ENST00000325455.10/5241, exon 3 of 8)	-27682	ENSG00000082175	PGR	progesterone receptor
chr11	101178292	101178828	*	+ 2 fold & sig. in both	E2 vs DMSO	1.10920983566338	0.00485005005423004	Intron (ENST00000632820.1/101054525, intron 5 of 6)	30142	NA	PGR-AS1	PGR antisense RNA 1
chr11	101299084	101299912	*	+ 2 fold & sig. in both	E2 vs DMSO	2.42299929730891	2.38202620753491e-08	Distal Intergenic	150934	NA	PGR-AS1	PGR antisense RNA 1
chr11	101336114	101336828	*	+ 2 fold & sig. in both	E2 vs DMSO	1.91091151816064	7.95645830661977e-07	Distal Intergenic	118749	ENSG00000137672	TRPC6	transient receptor potential cation channel subfamily C member 6
chr11	101436570	101436772	*	+ 2 fold & sig. in both	E2 vs DMSO	1.13432214845699	0.0282129855399348	Distal Intergenic	18805	ENSG00000137672	TRPC6	transient receptor potential cation channel subfamily C member 6
chr11	101441621	101442251	*	+ 2 fold & sig. in both	E2 vs DMSO	1.33705449877599	3.2167933128092e-07	Distal Intergenic	13326	ENSG00000137672	TRPC6	transient receptor potential cation channel subfamily C member 6
chr11	10742870	10743281	*	+ 2 fold & sig. in both	E2 vs DMSO	1.45044677573008	0.000171062778960603	Distal Intergenic	-7965	ENSG00000198730	CTR9	CTR9 homolog, Paf1/RNA polymerase II complex component
chr11	10743428	10743726	*	+ 2 fold & sig. in both	E2 vs DMSO	1.24485072183073	0.0180579791680711	Distal Intergenic	-7520	ENSG00000198730	CTR9	CTR9 homolog, Paf1/RNA polymerase II complex component
chr11	115471267	115471882	*	+ 2 fold & sig. in both	E2 vs DMSO	1.39922060531417	1.22378809307363e-06	Intron (ENST00000331581.11/23705, intron 1 of 11)	32507	ENSG00000182985	CADM1	cell adhesion molecule 1
chr11	117303075	117303496	*	+ 2 fold & sig. in both	E2 vs DMSO	1.76525018191819	1.17811715089904e-06	Intron (ENST00000313005.11/23621, intron 1 of 8)	-2338	ENSG00000186318	BACE1	beta-secretase 1
chr11	123096250	123097006	*	+ 2 fold & sig. in both	E2 vs DMSO	1.65449236405649	1.10513349917992e-07	Intron (ENST00000448775.4/79827, intron 2 of 6)	960	ENSG00000166250	CLMP	CXADR like membrane protein
chr11	129643073	129643765	*	+ 2 fold & sig. in both	E2 vs DMSO	1.2764210597651	1.8730495366256e-05	Distal Intergenic	-25804	ENSG00000281097	LINC01395	long intergenic non-protein coding RNA 1395
chr11	129694356	129694989	*	+ 2 fold & sig. in both	E2 vs DMSO	2.0205703911437	1.08220909665507e-08	Distal Intergenic	-77087	ENSG00000281097	LINC01395	long intergenic non-protein coding RNA 1395
chr11	129695932	129696384	*	+ 2 fold & sig. in both	E2 vs DMSO	1.00990238032888	0.00204755359021204	Distal Intergenic	-78663	ENSG00000281097	LINC01395	long intergenic non-protein coding RNA 1395
chr11	14015593	14016082	*	+ 2 fold & sig. in both	E2 vs DMSO	1.07155802828428	0.000140920162275266	Intron (ENST00000576479.4/10418, intron 2 of 15)	52870	ENSG00000262655	SPON1	spondin 1
chr11	15493903	15494536	*	+ 2 fold & sig. in both	E2 vs DMSO	1.20084172796502	0.000831398843367358	Distal Intergenic	-58319	ENSG00000254946	LINC02751	long intergenic non-protein coding RNA 2751
chr11	15901826	15902132	*	+ 2 fold & sig. in both	E2 vs DMSO	1.2745935234157	0.00581166182040695	Distal Intergenic	-8396	ENSG00000254661	LINC02682	long intergenic non-protein coding RNA 2682
chr11	17405461	17406068	*	+ 2 fold & sig. in both	E2 vs DMSO	1.37772913386657	6.27576631804362e-06	Promoter	-814	ENSG00000006071	ABCC8	ATP binding cassette subfamily C member 8
chr11	1749611	1750915	*	+ 2 fold & sig. in both	E2 vs DMSO	1.33837321261036	4.14124034138323e-06	Promoter	0	ENSG00000244242	IFITM10	interferon induced transmembrane protein 10
chr11	1772436	1772966	*	+ 2 fold & sig. in both	E2 vs DMSO	1.5862368710166	2.62443961391695e-07	Distal Intergenic	5422	NA	LOC105376517	uncharacterized LOC105376517
chr11	1778301	1778781	*	+ 2 fold & sig. in both	E2 vs DMSO	1.26979226826743	0.000448558500541904	Promoter	0	NA	LOC105376517	uncharacterized LOC105376517
chr11	1782872	1783399	*	+ 2 fold & sig. in both	E2 vs DMSO	1.15433229048495	3.23789455147312e-06	Distal Intergenic	-4484	NA	LOC105376517	uncharacterized LOC105376517
chr11	17924744	17925047	*	+ 2 fold & sig. in both	E2 vs DMSO	1.26408768679007	0.00549708561982567	Intron (ENST00000528369.5/26297, intron 1 of 2)	14585	ENSG00000129158	SERGEF	secretion regulating guanine nucleotide exchange factor
chr11	19380356	19380875	*	+ 2 fold & sig. in both	E2 vs DMSO	1.2441422499721	2.67700179672397e-05	Exon (ENST00000528204.1/ENST00000528204.1, exon 1 of 2)	29632	ENSG00000166833	NAV2	neuron navigator 2
chr11	20031622	20032306	*	+ 2 fold & sig. in both	E2 vs DMSO	1.29337482255483	2.36896662693416e-06	Intron (ENST00000360655.8/89797, intron 11 of 37)	4068	ENSG00000166833	NAV2	neuron navigator 2
chr11	2168726	2169749	*	+ 2 fold & sig. in both	E2 vs DMSO	1.62884411254693	8.46707222641618e-06	Promoter	0	ENSG00000180176	TH	tyrosine hydroxylase
chr11	2190802	2191439	*	+ 2 fold & sig. in both	E2 vs DMSO	1.30474018755353	2.86678852772338e-06	Distal Intergenic	17739	ENSG00000265258	MIR4686	microRNA 4686
chr11	2193183	2193819	*	+ 2 fold & sig. in both	E2 vs DMSO	1.51673264226094	6.07749064782125e-07	Distal Intergenic	20120	ENSG00000265258	MIR4686	microRNA 4686
chr11	21950155	21950475	*	+ 2 fold & sig. in both	E2 vs DMSO	1.54367745924649	0.00300640976444766	Intron (ENST00000682428.1/102723370, intron 5 of 6)	150221	ENSG00000171714	ANO5	anoctamin 5
chr11	282699	283029	*	+ 2 fold & sig. in both	E2 vs DMSO	1.38075679000402	0.000450274030085883	Exon (ENST00000534750.6/171389, exon 5 of 8)	3640	ENSG00000174885	NLRP6	NLR family pyrin domain containing 6
chr11	28343126	28343604	*	+ 2 fold & sig. in both	E2 vs DMSO	1.06034263121784	0.0106086781024058	Intron (ENST00000532947.2/196074, intron 3 of 7)	15545	ENSG00000169519	METTL15	methyltransferase like 15
chr11	30411382	30411722	*	+ 2 fold & sig. in both	E2 vs DMSO	1.09477337339322	0.0132613321632731	3' UTR	29681	ENSG00000066382	MPPED2	metallophosphoesterase domain containing 2
chr11	30521381	30522053	*	+ 2 fold & sig. in both	E2 vs DMSO	1.34914047185483	1.17576712718207e-06	Intron (ENST00000448418.6/744, intron 3 of 6)	14012	ENSG00000066382	MPPED2	metallophosphoesterase domain containing 2
chr11	34284792	34285123	*	+ 2 fold & sig. in both	E2 vs DMSO	1.34156334254615	0.00911048768442741	Intron (ENST00000435224.3/25841, intron 1 of 16)	-42247	ENSG00000166016	ABTB2	ankyrin repeat and BTB domain containing 2
chr11	34296303	34296814	*	+ 2 fold & sig. in both	E2 vs DMSO	1.04123828071141	0.00961779395791311	Intron (ENST00000435224.3/25841, intron 1 of 16)	-53758	ENSG00000166016	ABTB2	ankyrin repeat and BTB domain containing 2
chr11	35016738	35017190	*	+ 2 fold & sig. in both	E2 vs DMSO	1.14162243457076	0.00980108796665918	Intron (ENST00000477173.3/8050, intron 2 of 2)	32105	ENSG00000110435	PDHX	pyruvate dehydrogenase complex component X
chr11	35178934	35179246	*	+ 2 fold & sig. in both	E2 vs DMSO	1.11050988332927	0.044510024783712	Intron (ENST00000415148.6/960, intron 2 of 16)	-1033	ENSG00000026508	CD44	CD44 molecule (Indian blood group)
chr11	35276268	35276814	*	+ 2 fold & sig. in both	E2 vs DMSO	1.06643888657282	6.71495761829904e-05	Intron (ENST00000278379.9/6506, intron 9 of 10)	-4999	NA	SLC1A2-AS1	SLC1A2 antisense RNA 1
chr11	35949970	35950499	*	+ 2 fold & sig. in both	E2 vs DMSO	1.73318121396353	1.41630883120447e-05	Intron (ENST00000524419.5/143458, intron 1 of 5)	5871	ENSG00000179241	LDLRAD3	low density lipoprotein receptor class A domain containing 3
chr11	38972009	38972545	*	+ 2 fold & sig. in both	E2 vs DMSO	1.00279700957218	0.00134286558063929	Distal Intergenic	323151	ENSG00000254562	LINC01493	long intergenic non-protein coding RNA 1493
chr11	395879	396420	*	+ 2 fold & sig. in both	E2 vs DMSO	1.71352910479069	8.55176146051135e-07	Promoter	0	ENSG00000184363	PKP3	plakophilin 3
chr11	46985017	46985358	*	+ 2 fold & sig. in both	E2 vs DMSO	1.32204789502856	0.00318052897847205	Intron (ENST00000533124.5/79096, intron 1 of 2)	48237	ENSG00000149179	C11orf49	chromosome 11 open reading frame 49
chr11	61820797	61821169	*	+ 2 fold & sig. in both	E2 vs DMSO	1.29805425901412	0.000234790126973317	Intron (ENST00000574708.5/9415, intron 1 of 2)	-3600	ENSG00000149485	FADS1	fatty acid desaturase 1
chr11	64506556	64507025	*	+ 2 fold & sig. in both	E2 vs DMSO	1.39659523020431	0.00255402471450669	Distal Intergenic	-48665	ENSG00000168065	SLC22A11	solute carrier family 22 member 11
chr11	647572	647880	*	+ 2 fold & sig. in both	E2 vs DMSO	1.54837985314004	0.0024248583965513	Promoter	-976	ENSG00000177030	DEAF1	DEAF1 transcription factor
chr11	67062113	67062861	*	+ 2 fold & sig. in both	E2 vs DMSO	1.39222831265723	1.08826335960389e-07	Intron (ENST00000308831.7/29984, intron 1 of 4)	5224	ENSG00000173156	RHOD	ras homolog family member D
chr11	68038179	68038501	*	+ 2 fold & sig. in both	E2 vs DMSO	1.29951363672944	0.00385323812873942	Promoter	-524	ENSG00000110719	TCIRG1	T cell immune regulator 1, ATPase H+ transporting V0 subunit a3
chr11	69368378	69368825	*	+ 2 fold & sig. in both	E2 vs DMSO	1.04737558835184	0.0106507926861899	Intron (ENST00000561588.3/105369370, intron 1 of 2)	26822	NA	LOC105369370	uncharacterized LOC105369370
chr11	69515022	69515942	*	+ 2 fold & sig. in both	E2 vs DMSO	1.07368714136314	1.31914053298821e-07	Distal Intergenic	29411	NA	LINC01488	long intergenic non-protein coding RNA 1488
chr11	69524226	69525108	*	+ 2 fold & sig. in both	E2 vs DMSO	1.28978484470776	4.62585744514614e-06	Distal Intergenic	38615	NA	LINC01488	long intergenic non-protein coding RNA 1488
chr11	69554945	69555197	*	+ 2 fold & sig. in both	E2 vs DMSO	1.10747409859084	0.0324760906602141	Distal Intergenic	69334	NA	LINC01488	long intergenic non-protein coding RNA 1488
chr11	69603940	69604468	*	+ 2 fold & sig. in both	E2 vs DMSO	1.07790391322514	0.000196982777158813	Distal Intergenic	-36688	ENSG00000110092	CCND1	cyclin D1
chr11	69696842	69697680	*	+ 2 fold & sig. in both	E2 vs DMSO	1.3403454233936	1.23404526443131e-07	Distal Intergenic	6342	ENSG00000162344	FGF19	fibroblast growth factor 19
chr11	69891384	69892186	*	+ 2 fold & sig. in both	E2 vs DMSO	1.20049221798603	2.40295782187099e-06	Distal Intergenic	-71968	ENSG00000186895	FGF3	fibroblast growth factor 3
chr11	69906562	69906895	*	+ 2 fold & sig. in both	E2 vs DMSO	1.14880786363856	0.00223867959329622	Distal Intergenic	-78981	ENSG00000131620	ANO1	anoctamin 1
chr11	70104587	70104870	*	+ 2 fold & sig. in both	E2 vs DMSO	1.61357320509414	0.000326946987083462	Promoter	458	ENSG00000131620	ANO1	anoctamin 1
chr11	71433536	71434065	*	+ 2 fold & sig. in both	E2 vs DMSO	1.2230674772214	0.00022392842249733	Intron (ENST00000534795.5/1717, intron 2 of 2)	4894	ENSG00000172893	DHCR7	7-dehydrocholesterol reductase
chr11	71500547	71501213	*	+ 2 fold & sig. in both	E2 vs DMSO	1.04089645182043	6.5367743541794e-05	Intron (ENST00000319023.7/55191, intron 20 of 20)	2145	ENSG00000172890	NADSYN1	NAD synthetase 1
chr11	72771499	72771773	*	+ 2 fold & sig. in both	E2 vs DMSO	1.23932968423551	0.000771996610350326	Intron (ENST00000359373.9/116985, intron 1 of 33)	9343	ENSG00000214530	STARD10	StAR related lipid transfer domain containing 10
chr11	74672699	74673692	*	+ 2 fold & sig. in both	E2 vs DMSO	1.00878294969381	2.68380322166817e-05	Distal Intergenic	24002	ENSG00000054938	CHRDL2	chordin like 2
chr11	75333750	75334112	*	+ 2 fold & sig. in both	E2 vs DMSO	2.07116327647062	3.66568514070888e-08	Intron (ENST00000420843.7/408, intron 1 of 15)	1074	ENSG00000199090	MIR326	microRNA 326
chr11	76772483	76773140	*	+ 2 fold & sig. in both	E2 vs DMSO	1.90559072123614	1.88723326143919e-08	Distal Intergenic	-3861	NA	NA	NA
chr11	78259782	78260731	*	+ 2 fold & sig. in both	E2 vs DMSO	2.06631145530305	2.52034888617612e-09	Intron (ENST00000361507.5/9846, intron 2 of 9)	-27850	ENSG00000033327	GAB2	GRB2 associated binding protein 2
chr11	78311744	78312339	*	+ 2 fold & sig. in both	E2 vs DMSO	1.62427848350167	1.5231139216598e-07	Intron (ENST00000361507.5/9846, intron 1 of 9)	-2457	NA	LOC105369402	uncharacterized LOC105369402
chr11	78420681	78421360	*	+ 2 fold & sig. in both	E2 vs DMSO	1.33757882453576	1.79636295861685e-07	Intron (ENST00000534168.1/ENST00000534168.1, intron 1 of 1)	-2333	ENSG00000033327	GAB2	GRB2 associated binding protein 2
chr11	79059794	79060701	*	+ 2 fold & sig. in both	E2 vs DMSO	1.75911370056476	1.06623758727459e-07	Intron (ENST00000278550.12/26011, intron 6 of 33)	15692	ENSG00000149256	TENM4	teneurin transmembrane protein 4
chr11	79353784	79354069	*	+ 2 fold & sig. in both	E2 vs DMSO	1.08153908979253	0.0241820589127901	Intron (ENST00000278550.12/26011, intron 1 of 33)	48040	ENSG00000211997	MIR708	microRNA 708
chr11	83004104	83004728	*	+ 2 fold & sig. in both	E2 vs DMSO	1.63267554121385	6.60458648096955e-06	Intron (ENST00000527550.1/ENST00000527550.1, intron 1 of 1)	-6626	ENSG00000137502	RAB30	RAB30, member RAS oncogene family
chr11	84688433	84688910	*	+ 2 fold & sig. in both	E2 vs DMSO	1.33302413823	6.27576631804362e-06	Intron (ENST00000398309.6/1740, intron 1 of 22)	31671	ENSG00000150672	DLG2	discs large MAGUK scaffold protein 2
chr11	86776213	86776692	*	+ 2 fold & sig. in both	E2 vs DMSO	2.17082102382833	1.5932267659831e-07	Distal Intergenic	-14367	ENSG00000150687	PRSS23	serine protease 23
chr11	9083967	9084395	*	+ 2 fold & sig. in both	E2 vs DMSO	1.01984899400929	0.0199174891736017	Intron (ENST00000649792.2/57758, intron 2 of 22)	5984	ENSG00000264984	MIR5691	microRNA 5691
chr11	9089591	9089986	*	+ 2 fold & sig. in both	E2 vs DMSO	1.13556756441607	0.000540800307950549	Promoter	393	ENSG00000264984	MIR5691	microRNA 5691
chr11	9896848	9897396	*	+ 2 fold & sig. in both	E2 vs DMSO	1.17489941009096	4.73095609939153e-05	Intron (ENST00000533659.1/101928008, intron 1 of 2)	-53797	ENSG00000133812	SBF2	SET binding factor 2
chr12	100952333	100953024	*	+ 2 fold & sig. in both	E2 vs DMSO	1.17214527525526	8.7270763342804e-05	Intron (ENST00000549155.6/121601, intron 7 of 10)	-34095	ENSG00000151572	ANO4	anoctamin 4
chr12	103524292	103524863	*	+ 2 fold & sig. in both	E2 vs DMSO	1.93887507785644	9.52422521695352e-07	Intron (ENST00000650784.1/374470, intron 3 of 3)	-22888	ENSG00000257762	LINC02401	long intergenic non-protein coding RNA 2401
chr12	107685026	107685360	*	+ 2 fold & sig. in both	E2 vs DMSO	1.28918145196903	0.0281933707840098	Promoter	-439	ENSG00000136045	PWP1	PWP1 homolog, endonuclein
chr12	119171091	119171639	*	+ 2 fold & sig. in both	E2 vs DMSO	1.28070132823397	3.15511544646009e-06	Exon (ENST00000676008.1/ENST00000676008.1, exon 1 of 3)	-2287	ENSG00000152137	HSPB8	heat shock protein family B (small) member 8
chr12	121175917	121176232	*	+ 2 fold & sig. in both	E2 vs DMSO	1.04176178361608	0.0407266902772026	Intron (ENST00000537312.5/5027, intron 8 of 10)	-33833	ENSG00000135124	P2RX4	purinergic receptor P2X 4
chr12	124217506	124218407	*	+ 2 fold & sig. in both	E2 vs DMSO	1.50802487652466	5.07666105615751e-06	Intron (ENST00000389727.8/100533183, intron 3 of 4)	-70757	ENSG00000178882	RFLNA	refilin A
chr12	124392837	124393657	*	+ 2 fold & sig. in both	E2 vs DMSO	1.07116453827067	6.06649633621265e-06	Intron (ENST00000404621.5/9612, intron 17 of 46)	-4013	ENSG00000196498	NCOR2	nuclear receptor corepressor 2
chr12	124410449	124410971	*	+ 2 fold & sig. in both	E2 vs DMSO	1.31914270281056	0.000275260719905131	Intron (ENST00000404621.5/9612, intron 14 of 46)	11583	ENSG00000196498	NCOR2	nuclear receptor corepressor 2
chr12	131860483	131861393	*	+ 2 fold & sig. in both	E2 vs DMSO	1.30225125652046	4.23926354788162e-08	Intron (ENST00000542763.2/124903058, intron 1 of 2)	3063	NA	NA	NA
chr12	131865150	131865701	*	+ 2 fold & sig. in both	E2 vs DMSO	1.17779320140045	6.54808478385554e-07	Distal Intergenic	7730	NA	NA	NA
chr12	15243064	15243943	*	+ 2 fold & sig. in both	E2 vs DMSO	1.39882019895756	2.78684502340542e-06	Intron (ENST00000393736.3/105369673, intron 2 of 3)	-21647	ENSG00000134533	RERG	RAS like estrogen regulated growth inhibitor
chr12	15273945	15274243	*	+ 2 fold & sig. in both	E2 vs DMSO	1.92787636808407	4.7799008214296e-05	Intron (ENST00000393736.3/105369673, intron 2 of 3)	-48014	ENSG00000151490	PTPRO	protein tyrosine phosphatase receptor type O
chr12	15754841	15755231	*	+ 2 fold & sig. in both	E2 vs DMSO	1.50536934298305	0.00461914947139162	Intron (ENST00000281172.10/2059, intron 1 of 20)	25496	ENSG00000151491	EPS8	epidermal growth factor receptor pathway substrate 8
chr12	25518581	25518972	*	+ 2 fold & sig. in both	E2 vs DMSO	1.93783592192434	1.20354280535089e-05	Exon (ENST00000543629.5/160492, exon 3 of 5)	989	ENSG00000152936	LMNTD1	lamin tail domain containing 1
chr12	31459914	31460438	*	+ 2 fold & sig. in both	E2 vs DMSO	1.3797970141849	1.01503811166456e-05	Exon (ENST00000389082.10/160518, exon 4 of 21)	-33163	ENSG00000170456	DENND5B	DENN domain containing 5B
chr12	31773128	31773780	*	+ 2 fold & sig. in both	E2 vs DMSO	1.08040917824059	0.000286036698914373	Distal Intergenic	18518	ENSG00000188375	H3-5	H3.5 histone
chr12	3349860	3350167	*	+ 2 fold & sig. in both	E2 vs DMSO	1.30161477756688	0.0119805184868401	Intron (ENST00000636557.1/100128253, intron 1 of 5)	-12658	NA	LOC100128253	uncharacterized LOC100128253
chr12	3514257	3514692	*	+ 2 fold & sig. in both	E2 vs DMSO	1.26742470255493	0.00179691531981851	Intron (ENST00000452611.6/56341, intron 1 of 9)	-21438	ENSG00000287243	THCAT155	thyroid cancer-associated transcript 155
chr12	5088868	5089279	*	+ 2 fold & sig. in both	E2 vs DMSO	1.1844669045229	0.0125667401592624	Intron (ENST00000648143.1/ENST00000648143.1, intron 1 of 1)	44989	ENSG00000130037	KCNA5	potassium voltage-gated channel subfamily A member 5
chr12	524070	524697	*	+ 2 fold & sig. in both	E2 vs DMSO	1.00794782544115	0.0133113398160442	Intron (ENST00000266383.10/283358, intron 1 of 19)	-15766	ENSG00000139044	B4GALNT3	beta-1,4-N-acetyl-galactosaminyltransferase 3
chr12	5379606	5380151	*	+ 2 fold & sig. in both	E2 vs DMSO	1.2037895693863	7.71537927529056e-05	Intron (ENST00000537714.1/105369617, intron 1 of 1)	8043	NA	LOC105369617	uncharacterized LOC105369617
chr12	54933447	54933818	*	+ 2 fold & sig. in both	E2 vs DMSO	1.19169093816499	0.00102470221273808	Distal Intergenic	28879	ENSG00000135426	TESPA1	thymocyte expressed, positive selection associated 1
chr12	57096065	57096611	*	+ 2 fold & sig. in both	E2 vs DMSO	1.64930261476705	3.56214611907388e-06	3' UTR	679	ENSG00000166888	STAT6	signal transducer and activator of transcription 6
chr12	57101836	57102302	*	+ 2 fold & sig. in both	E2 vs DMSO	1.12262498903459	1.27206933800056e-05	Promoter	145	ENSG00000166888	STAT6	signal transducer and activator of transcription 6
chr12	57723351	57723619	*	+ 2 fold & sig. in both	E2 vs DMSO	1.15379956441147	0.000674675374567578	Intron (ENST00000700670.1/100130776, intron 3 of 3)	-2652	ENSG00000255737	AGAP2-AS1	AGAP2 antisense RNA 1
chr12	63086571	63086879	*	+ 2 fold & sig. in both	E2 vs DMSO	1.66269523945521	0.000436066498165633	Distal Intergenic	63300	ENSG00000166148	AVPR1A	arginine vasopressin receptor 1A
chr12	68792702	68793755	*	+ 2 fold & sig. in both	E2 vs DMSO	1.03087906000816	1.28135704621615e-05	3' UTR	11724	NA	LOC100130075	SUZ RNA binding domain containing 1 pseudogene
chr12	69059534	69059886	*	+ 2 fold & sig. in both	E2 vs DMSO	1.09733964541343	0.00808777045797818	Distal Intergenic	-87964	ENSG00000135678	CPM	carboxypeptidase M
chr12	75706032	75706776	*	+ 2 fold & sig. in both	E2 vs DMSO	1.78823801941933	6.05441969041968e-08	Intron (ENST00000552856.1/105369844, intron 2 of 4)	-7216	NA	LOC105369844	uncharacterized LOC105369844
chr12	75711115	75711697	*	+ 2 fold & sig. in both	E2 vs DMSO	2.11218034932038	7.62918447721803e-07	Intron (ENST00000552856.1/105369844, intron 2 of 4)	-12299	NA	LOC105369844	uncharacterized LOC105369844
chr12	7886017	7886333	*	+ 2 fold & sig. in both	E2 vs DMSO	1.27522970886041	0.00468510856301462	Intron (ENST00000539924.5/144195, intron 1 of 9)	4815	ENSG00000173262	SLC2A14	solute carrier family 2 member 14
chr12	89422398	89422640	*	+ 2 fold & sig. in both	E2 vs DMSO	1.00549895871951	0.0249660402446921	Intron (ENST00000549591.1/282809, intron 1 of 1)	6820	ENSG00000139323	POC1B	POC1 centriolar protein B
chr12	89424877	89425417	*	+ 2 fold & sig. in both	E2 vs DMSO	1.80502414134396	1.20070981255393e-06	3' UTR	4043	ENSG00000139323	POC1B	POC1 centriolar protein B
chr12	9132193	9132573	*	+ 2 fold & sig. in both	E2 vs DMSO	1.20511058424637	0.0036990099728819	Distal Intergenic	-15964	ENSG00000175899	A2M	alpha-2-macroglobulin
chr12	93107417	93107989	*	+ 2 fold & sig. in both	E2 vs DMSO	1.22721703926967	0.00473849266186113	Exon (ENST00000657309.1/105369908, exon 5 of 5)	11741	NA	LOC105369908	uncharacterized LOC105369908
chr12	95205586	95205920	*	+ 2 fold & sig. in both	E2 vs DMSO	1.09059137114214	0.026360391199113	Intron (ENST00000343958.9/55785, intron 2 of 20)	3036	ENSG00000180263	FGD6	FYVE, RhoGEF and PH domain containing 6
chr12	97500099	97501223	*	+ 2 fold & sig. in both	E2 vs DMSO	1.41514605529389	9.52585116678638e-06	Intron (ENST00000640149.1/196475, intron 10 of 13)	5445	ENSG00000255794	RMST	rhabdomyosarcoma 2 associated transcript
chr12	97701857	97702336	*	+ 2 fold & sig. in both	E2 vs DMSO	1.22430333741868	2.81574587443042e-05	Intron (ENST00000701071.1/643711, intron 2 of 2)	51262	ENSG00000257501	PAFAH1B2P2	PAFAH1B2 pseudogene 2
chr12	98358400	98358688	*	+ 2 fold & sig. in both	E2 vs DMSO	1.47937372539009	0.00158666546981897	Distal Intergenic	98427	ENSG00000227825	SLC9A7P1	solute carrier family 9 member 7 pseudogene 1
chr12	99766436	99766767	*	+ 2 fold & sig. in both	E2 vs DMSO	1.12412144837668	0.00705651249207707	Intron (ENST00000547776.6/56899, intron 8 of 25)	8876	ENSG00000185046	ANKS1B	ankyrin repeat and sterile alpha motif domain containing 1B
chr13	112616703	112617305	*	+ 2 fold & sig. in both	E2 vs DMSO	1.20184637150204	0.000426865547004786	Distal Intergenic	-28498	ENSG00000126216	TUBGCP3	tubulin gamma complex associated protein 3
chr13	112760524	112760782	*	+ 2 fold & sig. in both	E2 vs DMSO	1.19872231897238	0.0105512749133158	Intron (ENST00000375645.8/23250, intron 1 of 29)	-5831	ENSG00000232684	ATP11A-AS1	ATP11A antisense RNA 1
chr13	112913288	112913950	*	+ 2 fold & sig. in both	E2 vs DMSO	3.10160883898263	8.68568874993016e-10	Intron (ENST00000375608.7/23263, intron 2 of 29)	11093	ENSG00000126217	MCF2L	MCF.2 cell line derived transforming sequence like
chr13	112985492	112985996	*	+ 2 fold & sig. in both	E2 vs DMSO	1.09868707178662	0.00118389446011074	Promoter	374	ENSG00000126217	MCF2L	MCF.2 cell line derived transforming sequence like
chr13	113410832	113411210	*	+ 2 fold & sig. in both	E2 vs DMSO	1.19527053655042	7.47875783801104e-05	Promoter	0	ENSG00000153531	ADPRHL1	ADP-ribosylhydrolase like 1
chr13	113548802	113549212	*	+ 2 fold & sig. in both	E2 vs DMSO	1.03096200265851	0.0206434867188339	Promoter	469	ENSG00000150403	TMCO3	transmembrane and coiled-coil domains 3
chr13	21529360	21529921	*	+ 2 fold & sig. in both	E2 vs DMSO	1.61420902416124	1.65225957951061e-05	Intron (ENST00000382374.9/221154, intron 4 of 11)	-13699	ENSG00000165487	MICU2	mitochondrial calcium uptake 2
chr13	26978123	26978832	*	+ 2 fold & sig. in both	E2 vs DMSO	1.87484430365292	2.28072326856807e-05	Intron (ENST00000637583.1/ENST00000637583.1, intron 2 of 2)	116874	ENSG00000152484	USP12	ubiquitin specific peptidase 12
chr13	27500491	27501183	*	+ 2 fold & sig. in both	E2 vs DMSO	1.00856639563674	1.58698370008921e-05	Distal Intergenic	-49900	ENSG00000122033	MTIF3	mitochondrial translational initiation factor 3
chr13	31074167	31074787	*	+ 2 fold & sig. in both	E2 vs DMSO	1.07606206062683	9.06418286348401e-05	Intron (ENST00000425638.2/ENST00000425638.2, intron 3 of 15)	-17801	NA	LOC102723392	uncharacterized LOC102723392
chr13	33651781	33652318	*	+ 2 fold & sig. in both	E2 vs DMSO	1.56953287488497	0.000275503738563505	Intron (ENST00000686875.1/90627, intron 1 of 3)	24406	ENSG00000133121	STARD13	StAR related lipid transfer domain containing 13
chr13	40181496	40181796	*	+ 2 fold & sig. in both	E2 vs DMSO	1.00638533483852	0.0141532293133145	Exon (ENST00000455241.2/100874127, exon 2 of 5)	5046	NA	NA	NA
chr13	40895704	40896000	*	+ 2 fold & sig. in both	E2 vs DMSO	1.22412099252159	0.0108719355153955	Intron (ENST00000652519.1/100616668, intron 2 of 6)	25656	ENSG00000239827	SUGT1P3	SUGT1 pseudogene 3
chr13	41017147	41017460	*	+ 2 fold & sig. in both	E2 vs DMSO	1.00874032999518	0.00199731496428766	Intron (ENST00000239882.7/1997, intron 1 of 8)	1856	ENSG00000120690	ELF1	E74 like ETS transcription factor 1
chr13	43232128	43232749	*	+ 2 fold & sig. in both	E2 vs DMSO	1.14580367667101	0.000750361267852609	Intron (ENST00000690772.1/55068, intron 15 of 16)	73497	NA	LINC00400	long intergenic non-protein coding RNA 400
chr13	43232864	43233236	*	+ 2 fold & sig. in both	E2 vs DMSO	1.05020875089348	0.0013834778157272	Intron (ENST00000690772.1/55068, intron 15 of 16)	74233	NA	LINC00400	long intergenic non-protein coding RNA 400
chr13	44931283	44931686	*	+ 2 fold & sig. in both	E2 vs DMSO	1.20397799902622	0.00431450959340134	Distal Intergenic	57785	ENSG00000083635	NUFIP1	nuclear FMR1 interacting protein 1
chr13	46359705	46360281	*	+ 2 fold & sig. in both	E2 vs DMSO	1.21072370073926	4.3566420560684e-06	Intron (ENST00000676114.1/80183, intron 10 of 16)	-8698	ENSG00000102445	RUBCNL	rubicon like autophagy enhancer
chr13	48096617	48097242	*	+ 2 fold & sig. in both	E2 vs DMSO	1.09270051430601	0.000103812726271815	Distal Intergenic	-1486	ENSG00000136146	MED4	mediator complex subunit 4
chr13	51929712	51930063	*	+ 2 fold & sig. in both	E2 vs DMSO	1.10074793115117	0.016864636391435	Distal Intergenic	4458	ENSG00000281106	TMEM272	transmembrane protein 272
chr13	68685984	68686936	*	+ 2 fold & sig. in both	E2 vs DMSO	1.71883567327894	6.46618202177339e-07	Distal Intergenic	-191444	NA	LINC02342	long intergenic non-protein coding RNA 2342
chr13	82305660	82306067	*	+ 2 fold & sig. in both	E2 vs DMSO	1.24958490033089	0.00409890228276678	Distal Intergenic	1055222	NA	LOC105370281	uncharacterized LOC105370281
chr13	98293109	98293964	*	+ 2 fold & sig. in both	E2 vs DMSO	1.33785681859098	7.38245474384019e-06	Intron (ENST00000595437.5/10160, intron 2 of 27)	-34227	NA	LOC105370327	uncharacterized LOC105370327
chr13	98419811	98420632	*	+ 2 fold & sig. in both	E2 vs DMSO	1.22382300768131	2.11377972121185e-06	Intron (ENST00000595437.5/10160, intron 16 of 27)	-10411	ENSG00000152767	FARP1	FERM, ARH/RhoGEF and pleckstrin domain protein 1
chr14	100096429	100097011	*	+ 2 fold & sig. in both	E2 vs DMSO	1.20403114561113	2.73973823562448e-05	Promoter	0	ENSG00000196405	EVL	Enah/Vasp-like
chr14	103692911	103693911	*	+ 2 fold & sig. in both	E2 vs DMSO	1.25528439260494	1.67712020047789e-07	3' UTR	552	ENSG00000126214	KLC1	kinesin light chain 1
chr14	103930150	103930674	*	+ 2 fold & sig. in both	E2 vs DMSO	1.35931260757435	4.46265173635623e-06	Intron (ENST00000409874.9/122402, intron 1 of 35)	1333	ENSG00000156414	TDRD9	tudor domain containing 9
chr14	105328544	105329186	*	+ 2 fold & sig. in both	E2 vs DMSO	1.23698170910772	0.00209005622609847	Intron (ENST00000430725.6/23241, intron 1 of 23)	-7239	ENSG00000179364	PACS2	phosphofurin acidic cluster sorting protein 2
chr14	105624470	105625128	*	+ 2 fold & sig. in both	E2 vs DMSO	2.08677966377606	0.000235484781379171	3' UTR	3354	ENSG00000274172	MIR8071-1	microRNA 8071-1
chr14	32509582	32510202	*	+ 2 fold & sig. in both	E2 vs DMSO	1.42335539263729	2.41161059286826e-06	Intron (ENST00000280979.9/9472, intron 2 of 13)	14510	ENSG00000151320	AKAP6	A-kinase anchoring protein 6
chr14	33714973	33715544	*	+ 2 fold & sig. in both	E2 vs DMSO	1.06830991271956	0.0188513796192368	Intron (ENST00000551634.6/64067, intron 5 of 10)	-19670	ENSG00000151322	NPAS3	neuronal PAS domain protein 3
chr14	35331577	35332037	*	+ 2 fold & sig. in both	E2 vs DMSO	1.01551661866508	4.35055862940403e-05	Distal Intergenic	20744	ENSG00000100902	PSMA6	proteasome 20S subunit alpha 6
chr14	49549869	49550137	*	+ 2 fold & sig. in both	E2 vs DMSO	1.24722373473451	0.0455086645365734	Distal Intergenic	36188	ENSG00000213741	RPS29	ribosomal protein S29
chr14	49992805	49993349	*	+ 2 fold & sig. in both	E2 vs DMSO	1.79021877605241	6.3794318341315e-08	Promoter	0	ENSG00000214900	LINC01588	long intergenic non-protein coding RNA 1588
chr14	50018163	50018928	*	+ 2 fold & sig. in both	E2 vs DMSO	1.52391659297616	1.33698737918018e-08	Intron (ENST00000635379.1/196913, intron 5 of 11)	-6774	NA	LINC01599	long intergenic non-protein coding RNA 1599
chr14	50332900	50333428	*	+ 2 fold & sig. in both	E2 vs DMSO	1.36651947422697	0.000225813386412818	Intron (ENST00000358473.2/27109, intron 5 of 5)	5601	ENSG00000100490	CDKL1	cyclin dependent kinase like 1
chr14	52045226	52045494	*	+ 2 fold & sig. in both	E2 vs DMSO	1.1215398519327	0.017804613403913	Intron (ENST00000216286.10/22795, intron 5 of 21)	-3115	ENSG00000087303	NID2	nidogen 2
chr14	61553737	61554408	*	+ 2 fold & sig. in both	E2 vs DMSO	1.3319671709967	4.63630261344931e-06	Intron (ENST00000556347.1/5583, intron 3 of 3)	-8253	NA	LOC105370525	uncharacterized LOC105370525
chr14	61713786	61714404	*	+ 2 fold & sig. in both	E2 vs DMSO	1.27692374165364	1.03270865617342e-05	Exon (ENST00000698331.1/105370526, exon 5 of 6)	-12017	ENSG00000100644	HIF1A	hypoxia inducible factor 1 subunit alpha
chr14	63547757	63548542	*	+ 2 fold & sig. in both	E2 vs DMSO	1.60385130779143	1.37446184868901e-07	Distal Intergenic	4188	NA	LOC112268140	loricrin-like
chr14	63659617	63660196	*	+ 2 fold & sig. in both	E2 vs DMSO	1.45710326210244	2.60552699146308e-06	Intron (ENST00000665010.1/105370532, intron 2 of 2)	17464	ENSG00000274015	LOC105370532	uncharacterized LOC105370532
chr14	64234680	64235443	*	+ 2 fold & sig. in both	E2 vs DMSO	1.33229741981674	2.83145651774157e-07	3' UTR	16448	ENSG00000054654	SYNE2	spectrin repeat containing nuclear envelope protein 2
chr14	65118026	65118815	*	+ 2 fold & sig. in both	E2 vs DMSO	1.97754044721718	3.94467996026954e-08	Distal Intergenic	-15331	ENSG00000125952	MAX	MYC associated factor X
chr14	67371500	67371832	*	+ 2 fold & sig. in both	E2 vs DMSO	1.07288333683734	0.0108823123775307	Intron (ENST00000256383.11/1965, intron 2 of 7)	6602	ENSG00000134001	EIF2S1	eukaryotic translation initiation factor 2 subunit alpha
chr14	67479924	67480823	*	+ 2 fold & sig. in both	E2 vs DMSO	1.36796720260482	2.40202965014939e-07	Intron (ENST00000555638.5/161145, intron 2 of 8)	7898	ENSG00000198133	TMEM229B	transmembrane protein 229B
chr14	67567688	67568005	*	+ 2 fold & sig. in both	E2 vs DMSO	1.04039462510744	0.00104461997426956	Intron (ENST00000329153.10/57475, intron 7 of 28)	-1028	ENSG00000054690	PLEKHH1	pleckstrin homology, MyTH4 and FERM domain containing H1
chr14	68393350	68393834	*	+ 2 fold & sig. in both	E2 vs DMSO	1.19455592706371	4.58300253281485e-05	Intron (ENST00000479335.5/5890, intron 9 of 11)	6213	ENSG00000182185	RAD51B	RAD51 paralog B
chr14	69855334	69855903	*	+ 2 fold & sig. in both	E2 vs DMSO	1.14545651916643	2.26741608444657e-05	Intron (ENST00000555917.1/64093, intron 1 of 3)	1203	ENSG00000198732	SMOC1	SPARC related modular calcium binding 1
chr14	71448847	71449276	*	+ 2 fold & sig. in both	E2 vs DMSO	1.17309926486758	0.00482873734614015	Exon (ENST00000460552.3/ENST00000460552.3, exon 1 of 1)	-17909	ENSG00000197555	SIPA1L1	signal induced proliferation associated 1 like 1
chr14	71500537	71501254	*	+ 2 fold & sig. in both	E2 vs DMSO	1.30396890259278	0.000113622504744231	Intron (ENST00000553453.5/26037, intron 3 of 5)	-28071	ENSG00000197555	SIPA1L1	signal induced proliferation associated 1 like 1
chr14	73784677	73785159	*	+ 2 fold & sig. in both	E2 vs DMSO	1.50550031528205	1.28262571111484e-06	Intron (ENST00000394071.6/91748, intron 1 of 11)	2099	ENSG00000156030	MIDEAS	mitotic deacetylase associated SANT domain protein
chr14	74308727	74309087	*	+ 2 fold & sig. in both	E2 vs DMSO	1.45731413246304	0.00043271150492307	Intron (ENST00000557177.1/55237, intron 1 of 2)	5658	ENSG00000133980	VRTN	vertebrae development associated
chr14	75124002	75124556	*	+ 2 fold & sig. in both	E2 vs DMSO	1.2811577981114	2.89837762295582e-06	5' UTR	2377	ENSG00000119638	NEK9	NIMA related kinase 9
chr14	75289766	75290353	*	+ 2 fold & sig. in both	E2 vs DMSO	1.06086499498778	7.69644481238531e-05	Distal Intergenic	-4051	NA	LINC01220	long intergenic non-protein coding RNA 1220
chr14	76227443	76228117	*	+ 2 fold & sig. in both	E2 vs DMSO	1.14558537567082	0.00229723823294277	Intron (ENST00000556675.2/55668, intron 2 of 4)	31535	ENSG00000089916	GPATCH2L	G-patch domain containing 2 like
chr14	76347664	76347982	*	+ 2 fold & sig. in both	E2 vs DMSO	1.0740786051887	0.0208461583104194	Intron (ENST00000512784.6/2103, intron 1 of 6)	-23365	ENSG00000119715	ESRRB	estrogen related receptor beta
chr14	76651597	76652088	*	+ 2 fold & sig. in both	E2 vs DMSO	1.77807157002936	3.60365762606286e-07	Intron (ENST00000554926.1/105370577, intron 1 of 3)	74624	NA	LOC105370577	uncharacterized LOC105370577
chr14	77400105	77400748	*	+ 2 fold & sig. in both	E2 vs DMSO	1.8892809997993	4.86591800958041e-08	Intron (ENST00000380835.7/122945, intron 5 of 5)	22308	ENSG00000165555	NOXRED1	NADP dependent oxidoreductase domain containing 1
chr14	88010796	88011156	*	+ 2 fold & sig. in both	E2 vs DMSO	1.29462651030295	0.00180561441672467	5' UTR	5661	ENSG00000140030	GPR65	G protein-coupled receptor 65
chr14	90503468	90504068	*	+ 2 fold & sig. in both	E2 vs DMSO	2.00709961242397	2.64682902187887e-07	Distal Intergenic	46193	ENSG00000233208	LINC00642	long intergenic non-protein coding RNA 642
chr14	92963854	92964086	*	+ 2 fold & sig. in both	E2 vs DMSO	1.1899969757692	0.00590728332811646	Intron (ENST00000354313.7/3705, intron 5 of 10)	32177	ENSG00000100604	CHGA	chromogranin A
chr14	93011462	93012188	*	+ 2 fold & sig. in both	E2 vs DMSO	1.06866467416733	2.10389236546818e-05	Intron (ENST00000354313.7/3705, intron 4 of 10)	-12523	ENSG00000100605	ITPK1	inositol-tetrakisphosphate 1-kinase
chr14	93017095	93017806	*	+ 2 fold & sig. in both	E2 vs DMSO	2.40378040486471	1.34826077542179e-07	Intron (ENST00000354313.7/3705, intron 3 of 10)	-18156	ENSG00000100605	ITPK1	inositol-tetrakisphosphate 1-kinase
chr14	93032686	93033744	*	+ 2 fold & sig. in both	E2 vs DMSO	1.04055804270391	0.000328853769419467	Intron (ENST00000354313.7/3705, intron 3 of 10)	3136	ENSG00000100605	ITPK1	inositol-tetrakisphosphate 1-kinase
chr14	94334854	94335184	*	+ 2 fold & sig. in both	E2 vs DMSO	1.2522226979218	0.000201799542036401	Distal Intergenic	-11465	ENSG00000170099	SERPINA6	serpin family A member 6
chr14	94390438	94391168	*	+ 2 fold & sig. in both	E2 vs DMSO	2.41715340827024	1.33698737918018e-08	Promoter	0	ENSG00000197249	SERPINA1	serpin family A member 1
chr14	95003321	95003676	*	+ 2 fold & sig. in both	E2 vs DMSO	1.02172411912215	0.0245434628158876	Distal Intergenic	-40345	NA	LINC02279	long intergenic non-protein coding RNA 2279
chr14	95046832	95047540	*	+ 2 fold & sig. in both	E2 vs DMSO	1.3159321803895	1.19954537145453e-05	Exon (ENST00000554033.2/ENST00000554033.2, exon 1 of 3)	43782	ENSG00000100697	DICER1	dicer 1, ribonuclease III
chr14	95056239	95057088	*	+ 2 fold & sig. in both	E2 vs DMSO	1.57943054818399	5.35040773797510e-09	Distal Intergenic	34234	ENSG00000100697	DICER1	dicer 1, ribonuclease III
chr14	95068021	95068524	*	+ 2 fold & sig. in both	E2 vs DMSO	2.07274138595504	1.495504497339e-07	Distal Intergenic	22798	ENSG00000100697	DICER1	dicer 1, ribonuclease III
chr14	95413864	95414146	*	+ 2 fold & sig. in both	E2 vs DMSO	1.04221414477276	0.0225510269169736	3' UTR	42043	ENSG00000176438	SYNE3	spectrin repeat containing nuclear envelope family member 3
chr15	100516709	100517575	*	+ 2 fold & sig. in both	E2 vs DMSO	1.36092854028638	4.36029690808202e-07	Intron (ENST00000679737.1/204219, intron 2 of 11)	11375	ENSG00000154227	CERS3	ceramide synthase 3
chr15	33067832	33068466	*	+ 2 fold & sig. in both	E2 vs DMSO	1.65139323543367	6.16354768481285e-07	Promoter	0	ENSG00000248905	FMN1	formin 1
chr15	38593383	38594087	*	+ 2 fold & sig. in both	E2 vs DMSO	1.19048765186147	1.43464946342129e-05	Distal Intergenic	-27808	ENSG00000172575	RASGRP1	RAS guanyl releasing protein 1
chr15	50126206	50126522	*	+ 2 fold & sig. in both	E2 vs DMSO	1.14834477938621	0.00226488796473538	Intron (ENST00000558829.1/79895, intron 1 of 3)	-6749	ENSG00000104043	ATP8B4	ATPase phospholipid transporting 8B4 (putative)
chr15	52013138	52013402	*	+ 2 fold & sig. in both	E2 vs DMSO	1.87787831992362	2.9767097387845e-05	Intron (ENST00000560802.1/5597, intron 2 of 2)	5693	ENSG00000259438	MAPK6-DT	MAPK6 divergent transcript
chr15	57328018	57328607	*	+ 2 fold & sig. in both	E2 vs DMSO	1.03126607158731	0.000358248676599884	Distal Intergenic	8694	ENSG00000260172	LINC01413	long intergenic non-protein coding RNA 1413
chr15	62845469	62846269	*	+ 2 fold & sig. in both	E2 vs DMSO	1.23454670355399	2.26741608444657e-05	Intron (ENST00000557994.1/105370854, intron 2 of 3)	-2396	ENSG00000259370	LOC105370854	uncharacterized LOC105370854
chr15	62853384	62853862	*	+ 2 fold & sig. in both	E2 vs DMSO	1.6599159251562	1.06393391325755e-05	Intron (ENST00000557994.1/105370854, intron 1 of 3)	-10311	ENSG00000259370	LOC105370854	uncharacterized LOC105370854
chr15	63387566	63388151	*	+ 2 fold & sig. in both	E2 vs DMSO	1.03818305836309	0.000467306568087488	Distal Intergenic	-1985	NA	LINC02568	long intergenic non-protein coding RNA 2568
chr15	63896462	63897254	*	+ 2 fold & sig. in both	E2 vs DMSO	1.06638198966056	4.80105917661371e-07	Distal Intergenic	14689	ENSG00000035664	DAPK2	death associated protein kinase 2
chr15	64623853	64624450	*	+ 2 fold & sig. in both	E2 vs DMSO	1.17098649344071	0.000502347254636415	Intron (ENST00000326648.5/23060, intron 3 of 9)	-19320	ENSG00000180357	ZNF609	zinc finger protein 609
chr15	69499561	69500247	*	+ 2 fold & sig. in both	E2 vs DMSO	1.50907146791894	1.62295058801511e-05	Intron (ENST00000668790.1/145837, intron 3 of 6)	-25558	ENSG00000245750	DRAIC	downregulated RNA in cancer, inhibitor of cell invasion and migration
chr15	69848518	69848984	*	+ 2 fold & sig. in both	E2 vs DMSO	1.73953636661059	3.95136041252755e-08	Distal Intergenic	13303	ENSG00000245750	LINC00593	long intergenic non-protein coding RNA 593
chr15	70308098	70308898	*	+ 2 fold & sig. in both	E2 vs DMSO	2.48449526820901	1.1217089094562e-08	Distal Intergenic	197030	ENSG00000259473	LINC02205	long intergenic non-protein coding RNA 2205
chr15	70378086	70378681	*	+ 2 fold & sig. in both	E2 vs DMSO	1.95083819080994	7.29961125881704e-07	Distal Intergenic	127247	ENSG00000259473	LINC02205	long intergenic non-protein coding RNA 2205
chr15	71096469	71097102	*	+ 2 fold & sig. in both	E2 vs DMSO	1.27746452050219	1.17811715089904e-06	Promoter	0	ENSG00000187720	THSD4	thrombospondin type 1 domain containing 4
chr15	71104506	71105128	*	+ 2 fold & sig. in both	E2 vs DMSO	1.92224024066664	3.84751677372445e-08	Intron (ENST00000355327.7/79875, intron 1 of 17)	7554	ENSG00000187720	THSD4	thrombospondin type 1 domain containing 4
chr15	74817064	74817813	*	+ 2 fold & sig. in both	E2 vs DMSO	1.10751254121692	1.60918147042201e-06	Intron (ENST00000470711.6/79748, intron 5 of 6)	841	ENSG00000140506	LMAN1L	lectin, mannose binding 1 like
chr15	84908542	84908962	*	+ 2 fold & sig. in both	E2 vs DMSO	1.10770463777509	5.45255934306128e-05	Exon (ENST00000538177.5/9154, exon 8 of 15)	23864	ENSG00000156222	SLC28A1	solute carrier family 28 member 1
chr15	86863949	86864641	*	+ 2 fold & sig. in both	E2 vs DMSO	1.62011325657482	5.07288119445181e-05	Intron (ENST00000614907.3/123624, intron 22 of 22)	-68239	ENSG00000259636	LOC105370954	uncharacterized LOC105370954
chr15	87878031	87878858	*	+ 2 fold & sig. in both	E2 vs DMSO	1.05521735269333	8.52842159820439e-05	Intron (ENST00000629765.3/4916, intron 19 of 19)	54232	ENSG00000140538	NTRK3	neurotrophic receptor tyrosine kinase 3
chr15	88623154	88623639	*	+ 2 fold & sig. in both	E2 vs DMSO	1.35407806963447	6.13046547158809e-06	Intron (ENST00000557787.1/64782, intron 1 of 1)	1773	ENSG00000181026	AEN	apoptosis enhancing nuclease
chr15	88630067	88630761	*	+ 2 fold & sig. in both	E2 vs DMSO	1.51570940759437	2.66827132674505e-06	3' UTR	3455	ENSG00000181026	AEN	apoptosis enhancing nuclease
chr15	89115415	89116045	*	+ 2 fold & sig. in both	E2 vs DMSO	1.42274052645537	3.39729285769269e-08	Promoter	-459	ENSG00000140526	ABHD2	abhydrolase domain containing 2, acylglycerol lipase
chr15	92069408	92069892	*	+ 2 fold & sig. in both	E2 vs DMSO	1.22742291237988	0.00290129364577567	Intron (ENST00000318445.11/28232, intron 2 of 9)	-28038	ENSG00000176463	SLCO3A1	solute carrier organic anion transporter family member 3A1
chr15	92187954	92188787	*	+ 2 fold & sig. in both	E2 vs DMSO	1.13663694244541	1.68241110006066e-06	Intron (ENST00000561674.1/ENST00000561674.1, intron 2 of 3)	34391	ENSG00000176463	SLCO3A1	solute carrier organic anion transporter family member 3A1
chr15	95716003	95716615	*	+ 2 fold & sig. in both	E2 vs DMSO	1.11034885698618	0.00562109127045119	Exon (ENST00000663174.1/ENST00000663174.1, exon 2 of 2)	-222160	NA	LOC105370993	uncharacterized LOC105370993
chr15	96372333	96373152	*	+ 2 fold & sig. in both	E2 vs DMSO	1.91286718908106	7.16363127561867e-08	Promoter	0	NA	LOC101927263	uncharacterized LOC101927263
chr16	10494707	10495078	*	+ 2 fold & sig. in both	E2 vs DMSO	1.33503280466264	0.00040382785290308	Distal Intergenic	22783	ENSG00000166669	ATF7IP2	activating transcription factor 7 interacting protein 2
chr16	10590262	10590816	*	+ 2 fold & sig. in both	E2 vs DMSO	1.69870442880477	2.17237364008356e-07	Distal Intergenic	-9630	ENSG00000213853	EMP2	epithelial membrane protein 2
chr16	11363212	11363660	*	+ 2 fold & sig. in both	E2 vs DMSO	1.17489861614479	1.12321378382936e-06	Intron (ENST00000649869.1/105371082, intron 1 of 2)	17742	NA	LOC105371082	uncharacterized LOC105371082
chr16	11706096	11706755	*	+ 2 fold & sig. in both	E2 vs DMSO	1.59358289208005	9.56059488786447e-07	Intron (ENST00000356957.7/51061, intron 5 of 12)	-15999	ENSG00000153066	TXNDC11	thioredoxin domain containing 11
chr16	12038873	12039544	*	+ 2 fold & sig. in both	E2 vs DMSO	1.22132268257419	2.32700574259929e-05	Promoter	163	ENSG00000048471	SNX29	sorting nexin 29
chr16	14357180	14357812	*	+ 2 fold & sig. in both	E2 vs DMSO	1.19527348283543	8.34896684267735e-05	Distal Intergenic	12454	ENSG00000260009	LINC02130	long intergenic non-protein coding RNA 2130
chr16	1601862	1602688	*	+ 2 fold & sig. in both	E2 vs DMSO	1.35341940863826	2.0507105463445e-05	Exon (ENST00000426508.7/9742, exon 4 of 31)	7356	ENSG00000187535	IFT140	intraflagellar transport 140
chr16	16101348	16101912	*	+ 2 fold & sig. in both	E2 vs DMSO	1.74469845927167	7.08210319522494e-05	Intron (ENST00000399408.7/4363, intron 20 of 31)	3356	ENSG00000103222	ABCC1	ATP binding cassette subfamily C member 1
chr16	16973719	16974196	*	+ 2 fold & sig. in both	E2 vs DMSO	1.17802484074569	7.42799015471218e-05	Distal Intergenic	-160308	ENSG00000261448	LOC102723692	uncharacterized LOC102723692
chr16	19987825	19988449	*	+ 2 fold & sig. in both	E2 vs DMSO	1.70344346348681	1.31509038433178e-06	Distal Intergenic	85318	ENSG00000180269	GPR139	G protein-coupled receptor 139
chr16	20013826	20014608	*	+ 2 fold & sig. in both	E2 vs DMSO	1.46443083408038	8.01688003405864e-06	Distal Intergenic	59159	ENSG00000180269	GPR139	G protein-coupled receptor 139
chr16	20880945	20881790	*	+ 2 fold & sig. in both	E2 vs DMSO	2.09043039233155	5.35040773797510e-09	Intron (ENST00000564349.5/112479, intron 2 of 9)	-11965	ENSG00000188215	DCUN1D3	defective in cullin neddylation 1 domain containing 3
chr16	21638703	21638961	*	+ 2 fold & sig. in both	E2 vs DMSO	1.11201088325732	0.0196614544091039	Intron (ENST00000567404.5/51108, intron 4 of 4)	13645	ENSG00000140749	IGSF6	immunoglobulin superfamily member 6
chr16	23079467	23080429	*	+ 2 fold & sig. in both	E2 vs DMSO	1.54691787661338	1.15594029330722e-07	3' UTR	6701	ENSG00000103404	USP31	ubiquitin specific peptidase 31
chr16	23137903	23138200	*	+ 2 fold & sig. in both	E2 vs DMSO	1.44356670302754	0.00225388492402472	Intron (ENST00000219689.12/57478, intron 1 of 15)	11252	ENSG00000103404	USP31	ubiquitin specific peptidase 31
chr16	2329556	2329901	*	+ 2 fold & sig. in both	E2 vs DMSO	1.01878785814743	0.00148729734957024	Promoter	0	ENSG00000167972	ABCA3	ATP binding cassette subfamily A member 3
chr16	23687144	23687384	*	+ 2 fold & sig. in both	E2 vs DMSO	1.15768754335896	0.0277001118423799	Promoter	7	ENSG00000166851	PLK1	polo like kinase 1
chr16	27242810	27243615	*	+ 2 fold & sig. in both	E2 vs DMSO	1.30303005660523	6.7028123257311e-08	Intron (ENST00000361439.9/197370, intron 2 of 7)	-9732	ENSG00000169189	NSMCE1	NSE1 homolog, SMC5-SMC6 complex component
chr16	27314303	27314756	*	+ 2 fold & sig. in both	E2 vs DMSO	1.16606553235075	0.000509771417664923	Promoter	273	ENSG00000077238	IL4R	interleukin 4 receptor
chr16	2744640	2745122	*	+ 2 fold & sig. in both	E2 vs DMSO	2.31874627367264	3.22495381993933e-07	Promoter	0	ENSG00000205913	SRRM2-AS1	SRRM2 antisense RNA 1
chr16	27897855	27898344	*	+ 2 fold & sig. in both	E2 vs DMSO	1.64630089686249	6.19812124480504e-06	Intron (ENST00000447459.7/146395, intron 2 of 6)	-9698	ENSG00000169181	GSG1L	GSG1 like
chr16	30821206	30821870	*	+ 2 fold & sig. in both	E2 vs DMSO	1.65636402025418	5.77359053059371e-08	Exon (ENST00000621583.1/ENST00000621583.1, exon 1 of 1)	18884	ENSG00000099385	BCL7C	BAF chromatin remodeling complex subunit BCL7C
chr16	316701	317309	*	+ 2 fold & sig. in both	E2 vs DMSO	1.8378681520483	5.87434392223269e-07	Intron (ENST00000461023.5/8312, intron 1 of 7)	-23165	ENSG00000103126	AXIN1	axin 1
chr16	326946	328019	*	+ 2 fold & sig. in both	E2 vs DMSO	1.06275398531161	6.84211596662537e-08	Intron (ENST00000461023.5/8312, intron 1 of 7)	18303	ENSG00000103126	AXIN1	axin 1
chr16	4152132	4152818	*	+ 2 fold & sig. in both	E2 vs DMSO	1.33062163765604	5.75308808408304e-08	Distal Intergenic	30697	NA	LOC105371062	uncharacterized LOC105371062
chr16	4684772	4685117	*	+ 2 fold & sig. in both	E2 vs DMSO	1.07449440890172	0.00764887051364618	Intron (ENST00000415496.5/23295, intron 15 of 15)	3424	ENSG00000102858	MGRN1	mahogunin ring finger 1
chr16	48235514	48236172	*	+ 2 fold & sig. in both	E2 vs DMSO	1.36700911402707	4.50872445302395e-06	Promoter	-337	ENSG00000121270	ABCC11	ATP binding cassette subfamily C member 11
chr16	49010053	49010670	*	+ 2 fold & sig. in both	E2 vs DMSO	1.29113251666902	1.02260718167892e-05	Distal Intergenic	263207	NA	LOC105371241	uncharacterized LOC105371241
chr16	4976683	4977119	*	+ 2 fold & sig. in both	E2 vs DMSO	1.06435663469014	0.0387604304807831	Intron (ENST00000251170.12/9717, intron 2 of 15)	-15942	ENSG00000118898	PPL	periplakin
chr16	54094618	54095108	*	+ 2 fold & sig. in both	E2 vs DMSO	1.249556830727	3.95192386958863e-05	Intron (ENST00000636992.1/79068, intron 8 of 8)	24722	ENSG00000140718	FTO	FTO alpha-ketoglutarate dependent dioxygenase
chr16	54423987	54424556	*	+ 2 fold & sig. in both	E2 vs DMSO	1.20797164877429	0.00012490777092619	Distal Intergenic	-53193	ENSG00000261803	LINC02140	long intergenic non-protein coding RNA 2140
chr16	55272732	55273135	*	+ 2 fold & sig. in both	E2 vs DMSO	2.19249398904633	2.37760296454184e-05	Intron (ENST00000558730.2/ENST00000558730.2, intron 2 of 3)	-51068	ENSG00000159387	IRX6	iroquois homeobox 6
chr16	58383804	58384715	*	+ 2 fold & sig. in both	E2 vs DMSO	1.70233392799801	4.12529488759404e-07	Exon (ENST00000516462.1/ENST00000516462.1, exon 1 of 1)	-7679	ENSG00000181938	GINS3	GINS complex subunit 3
chr16	67594584	67595322	*	+ 2 fold & sig. in both	E2 vs DMSO	1.53678679200676	3.3557356722819e-06	Intron (ENST00000646076.1/10664, intron 3 of 12)	-15268	ENSG00000102974	CTCF	CCCTC-binding factor
chr16	67917946	67918200	*	+ 2 fold & sig. in both	E2 vs DMSO	1.02325630980766	0.0138227077964117	Intron (ENST00000291041.6/5681, intron 2 of 2)	13285	ENSG00000141086	CTRL	chymotrypsin like
chr16	68426187	68426579	*	+ 2 fold & sig. in both	E2 vs DMSO	1.39797337263349	6.96897564509762e-05	Intron (ENST00000219334.10/55512, intron 1 of 8)	21863	ENSG00000103056	SMPD3	sphingomyelin phosphodiesterase 3
chr16	69324104	69325052	*	+ 2 fold & sig. in both	E2 vs DMSO	1.28165409227959	7.55644392791348e-07	3' UTR	2893	ENSG00000132612	VPS4A	vacuolar protein sorting 4 homolog A
chr16	70390603	70391220	*	+ 2 fold & sig. in both	E2 vs DMSO	1.35312237626558	3.44795732332348e-07	Intron (ENST00000566960.1/ENST00000566960.1, intron 1 of 1)	2539	ENSG00000157350	ST3GAL2	ST3 beta-galactoside alpha-2,3-sialyltransferase 2
chr16	72935983	72936446	*	+ 2 fold & sig. in both	E2 vs DMSO	1.54009069412616	1.69817967954666e-07	Intron (ENST00000268489.10/463, intron 3 of 9)	-46149	ENSG00000140836	ZFHX3	zinc finger homeobox 3
chr16	75342375	75342679	*	+ 2 fold & sig. in both	E2 vs DMSO	1.19217226639655	0.017793785739148	Intron (ENST00000283882.4/10428, intron 5 of 6)	20356	ENSG00000153774	CFDP1	craniofacial development protein 1
chr16	78607514	78607947	*	+ 2 fold & sig. in both	E2 vs DMSO	1.59838553388156	3.6380601293833e-07	Promoter	-541	NA	LOC105371354	uncharacterized LOC105371354
chr16	79037417	79038263	*	+ 2 fold & sig. in both	E2 vs DMSO	1.12537801445133	1.57771767281935e-05	Intron (ENST00000683929.1/51741, intron 9 of 10)	-51787	NA	LOC107984806	uncharacterized LOC107984806
chr16	79171876	79172192	*	+ 2 fold & sig. in both	E2 vs DMSO	1.8454582424206	1.12152980888784e-05	Intron (ENST00000683929.1/51741, intron 10 of 10)	-24167	ENSG00000186153	WWOX	WW domain containing oxidoreductase
chr16	79632240	79632635	*	+ 2 fold & sig. in both	E2 vs DMSO	1.15965147296779	0.00113210055423646	Distal Intergenic	-31503	ENSG00000178573	MAF	MAF bZIP transcription factor
chr16	80023918	80024330	*	+ 2 fold & sig. in both	E2 vs DMSO	1.16085978781957	3.6446367192812e-05	Distal Intergenic	-41506	NA	LOC105371357	uncharacterized LOC105371357
chr16	83912378	83912866	*	+ 2 fold & sig. in both	E2 vs DMSO	1.86877348088536	4.10936393370821e-05	Exon (ENST00000569024.1/ENST00000569024.1, exon 1 of 1)	4203	ENSG00000103150	MLYCD	malonyl-CoA decarboxylase
chr16	83946654	83947470	*	+ 2 fold & sig. in both	E2 vs DMSO	2.12378503257494	1.00042977004107e-08	Intron (ENST00000561562.5/23417, intron 2 of 3)	-1597	ENSG00000140961	OSGIN1	oxidative stress induced growth inhibitor 1
chr16	84460748	84461490	*	+ 2 fold & sig. in both	E2 vs DMSO	1.7144435223684	3.86868922004041e-05	Promoter	0	ENSG00000064270	ATP2C2	ATPase secretory pathway Ca2+ transporting 2
chr16	85288830	85289510	*	+ 2 fold & sig. in both	E2 vs DMSO	2.10249273533029	2.38333990083885e-09	Intron (ENST00000637419.1/23199, intron 1 of 2)	5872	ENSG00000179219	LINC00311	long intergenic non-protein coding RNA 311
chr16	85457399	85457632	*	+ 2 fold & sig. in both	E2 vs DMSO	1.00662349103846	0.000365603939157423	Intron (ENST00000637419.1/23199, intron 2 of 2)	-98335	ENSG00000131149	GSE1	Gse1 coiled-coil protein
chr16	85465808	85466456	*	+ 2 fold & sig. in both	E2 vs DMSO	1.50301834475469	1.36261120216801e-08	Intron (ENST00000637419.1/23199, intron 2 of 2)	-89511	ENSG00000131149	GSE1	Gse1 coiled-coil protein
chr16	86931232	86931721	*	+ 2 fold & sig. in both	E2 vs DMSO	2.00044895060604	1.2243214830713e-06	Exon (ENST00000687059.1/ENST00000687059.1, exon 1 of 2)	-126063	ENSG00000232190	LINC02181	long intergenic non-protein coding RNA 2181
chr16	8786419	8786872	*	+ 2 fold & sig. in both	E2 vs DMSO	1.15243102736998	0.0183331620514396	Intron (ENST00000564869.1/25880, intron 1 of 2)	-1951	ENSG00000140650	PMM2	phosphomannomutase 2
chr17	13321526	13322353	*	+ 2 fold & sig. in both	E2 vs DMSO	1.3328359126857	6.60458648096955e-06	Distal Intergenic	-14755	ENSG00000234634	LINC02093	long intergenic non-protein coding RNA 2093
chr17	14006602	14006935	*	+ 2 fold & sig. in both	E2 vs DMSO	1.73153022476468	3.57076667161343e-05	Intron (ENST00000582752.7/100874058, intron 2 of 4)	62462	ENSG00000236088	COX10-DT	COX10 divergent transcript
chr17	16922762	16923107	*	+ 2 fold & sig. in both	E2 vs DMSO	1.78692730057285	2.01099931762387e-06	Exon (ENST00000261651.6/96597, exon 14 of 14)	9398	NA	TBC1D27P	TBC1 domain family member 27, pseudogene
chr17	17155648	17155940	*	+ 2 fold & sig. in both	E2 vs DMSO	1.08330456689225	0.0283490526447571	Intron (ENST00000651222.2/23164, intron 13 of 23)	1296	ENSG00000133030	MPRIP	myosin phosphatase Rho interacting protein
chr17	1736348	1736841	*	+ 2 fold & sig. in both	E2 vs DMSO	1.91508437705376	1.15356605289701e-05	Intron (ENST00000437219.6/124997, intron 9 of 9)	5164	ENSG00000167716	WDR81	WD repeat domain 81
chr17	17604953	17605429	*	+ 2 fold & sig. in both	E2 vs DMSO	1.58522137340499	1.43464946342129e-05	Intron (ENST00000583662.1/ENST00000583662.1, intron 1 of 1)	-13245	ENSG00000133027	PEMT	phosphatidylethanolamine N-methyltransferase
chr17	1776835	1777393	*	+ 2 fold & sig. in both	E2 vs DMSO	1.9762057166579	7.23924379877507e-08	Promoter	385	ENSG00000132386	SERPINF1	serpin family F member 1
chr17	19538514	19539223	*	+ 2 fold & sig. in both	E2 vs DMSO	2.68387845623679	1.53095782271916e-08	Intron (ENST00000584348.5/55244, intron 1 of 6)	4634	ENSG00000142494	SLC47A1	solute carrier family 47 member 1
chr17	19554219	19554799	*	+ 2 fold & sig. in both	E2 vs DMSO	1.81125364541871	1.13027030935088e-07	Promoter	-710	ENSG00000142494	SLC47A1	solute carrier family 47 member 1
chr17	28536645	28537508	*	+ 2 fold & sig. in both	E2 vs DMSO	1.85777408764269	4.99604123252615e-08	3' UTR	10665	ENSG00000109103	UNC119	unc-119 lipid binding chaperone
chr17	33235088	33235719	*	+ 2 fold & sig. in both	E2 vs DMSO	1.58019616169204	0.000276220628376647	Intron (ENST00000225823.7/40, intron 1 of 9)	55388	ENSG00000108684	ASIC2	acid sensing ion channel subunit 2
chr17	33519616	33520074	*	+ 2 fold & sig. in both	E2 vs DMSO	2.32413856993787	2.75923679016898e-07	Intron (ENST00000359872.6/40, intron 1 of 9)	13686	ENSG00000265544	AA06	uncharacterized LOC100506677
chr17	40023113	40023908	*	+ 2 fold & sig. in both	E2 vs DMSO	1.01065776888735	0.000308286578847149	Promoter	0	ENSG00000008838	MED24	mediator complex subunit 24
chr17	40180682	40181012	*	+ 2 fold & sig. in both	E2 vs DMSO	1.26568762365657	0.00281066338353939	Promoter	-227	ENSG00000108352	RAPGEFL1	Rap guanine nucleotide exchange factor like 1
chr17	40448365	40449271	*	+ 2 fold & sig. in both	E2 vs DMSO	1.75154542059673	4.64794853512539e-09	Intron (ENST00000269593.5/3487, intron 1 of 3)	4915	ENSG00000141753	IGFBP4	insulin like growth factor binding protein 4
chr17	40549000	40549750	*	+ 2 fold & sig. in both	E2 vs DMSO	1.04540434470084	0.000165671906189533	Distal Intergenic	11263	ENSG00000126353	CCR7	C-C motif chemokine receptor 7
chr17	40576022	40576760	*	+ 2 fold & sig. in both	E2 vs DMSO	1.20884531046255	8.11637419119621e-07	Distal Intergenic	-10550	ENSG00000126353	CCR7	C-C motif chemokine receptor 7
chr17	40582113	40582872	*	+ 2 fold & sig. in both	E2 vs DMSO	1.09008846665481	6.53170567208813e-06	Distal Intergenic	-16641	ENSG00000126353	CCR7	C-C motif chemokine receptor 7
chr17	40686070	40686477	*	+ 2 fold & sig. in both	E2 vs DMSO	1.15388978943512	0.00117710493275021	Distal Intergenic	17275	ENSG00000167916	KRT24	keratin 24
chr17	41415933	41416288	*	+ 2 fold & sig. in both	E2 vs DMSO	1.59360882223576	9.83138985388084e-06	Intron (ENST00000432258.1/100505782, intron 3 of 3)	8297	ENSG00000108417	KRT37	keratin 37
chr17	41506473	41507096	*	+ 2 fold & sig. in both	E2 vs DMSO	1.76888762053587	1.44554728564026e-07	Promoter	-768	ENSG00000171401	KRT13	keratin 13
chr17	42628054	42628419	*	+ 2 fold & sig. in both	E2 vs DMSO	1.87363922059826	2.83102982870343e-05	Distal Intergenic	16179	ENSG00000131462	TUBG1	tubulin gamma 1
chr17	45124409	45124954	*	+ 2 fold & sig. in both	E2 vs DMSO	1.28652286822177	5.17191831721132e-05	Intron (ENST00000619929.5/113026, intron 1 of 14)	-5320	ENSG00000161714	PLCD3	phospholipase C delta 3
chr17	4533539	4534593	*	+ 2 fold & sig. in both	E2 vs DMSO	1.02776540569284	0.000809299991949194	Promoter	0	ENSG00000183018	SPNS2	sphingolipid transporter 2
chr17	45901006	45901383	*	+ 2 fold & sig. in both	E2 vs DMSO	1.36241468587446	0.00295358996280968	Intron (ENST00000680674.1/4137, intron 1 of 10)	5223	ENSG00000279685	MAPT-IT1	MAPT intronic transcript 1
chr17	4593525	4594055	*	+ 2 fold & sig. in both	E2 vs DMSO	1.55855184339942	8.16145954464205e-06	Exon (ENST00000338859.8/342527, exon 4 of 8)	-1011	ENSG00000188176	SMTNL2	smoothelin like 2
chr17	47673528	47674484	*	+ 2 fold & sig. in both	E2 vs DMSO	1.22789454250124	2.65606588060215e-07	Promoter	439	ENSG00000108424	KPNB1	karyopherin subunit beta 1
chr17	47693018	47693537	*	+ 2 fold & sig. in both	E2 vs DMSO	1.82205704906487	7.00570515011203e-07	Promoter	-624	ENSG00000198933	TBKBP1	TBK1 binding protein 1
chr17	48499722	48500465	*	+ 2 fold & sig. in both	E2 vs DMSO	1.16226093679441	0.000232287746478419	Distal Intergenic	30546	ENSG00000120094	HOXB1	homeobox B1
chr17	49920252	49920682	*	+ 2 fold & sig. in both	E2 vs DMSO	1.00344878526321	0.004901553128001	Intron (ENST00000518420.1/ENST00000518420.1, intron 2 of 2)	-47906	ENSG00000108813	DLX4	distal-less homeobox 4
chr17	50949963	50950333	*	+ 2 fold & sig. in both	E2 vs DMSO	1.27796659493838	8.78420621851545e-06	Distal Intergenic	25027	ENSG00000008294	SPAG9	sperm associated antigen 9
chr17	5313865	5314370	*	+ 2 fold & sig. in both	E2 vs DMSO	1.03538328279734	0.00107469278400427	Intron (ENST00000537505.6/9135, intron 2 of 17)	-17685	ENSG00000029725	RABEP1	rabaptin, RAB GTPase binding effector protein 1
chr17	57110789	57111119	*	+ 2 fold & sig. in both	E2 vs DMSO	1.10446211411429	0.000386365834890002	Intron (ENST00000337714.8/8165, intron 3 of 10)	-3370	ENSG00000121057	AKAP1	A-kinase anchoring protein 1
chr17	5717681	5718383	*	+ 2 fold & sig. in both	E2 vs DMSO	1.08931352826018	0.000165054842311726	Distal Intergenic	-13625	NA	NA	NA
chr17	57211615	57212214	*	+ 2 fold & sig. in both	E2 vs DMSO	1.23828691340895	3.16937945182683e-06	Intron (ENST00000649027.1/ENST00000649027.1, intron 1 of 1)	-43637	ENSG00000153944	MSI2	musashi RNA binding protein 2
chr17	57834010	57834695	*	+ 2 fold & sig. in both	E2 vs DMSO	1.3661597167311	2.89823493183121e-08	Exon (ENST00000581805.5/ENST00000581805.5, exon 1 of 3)	15302	ENSG00000181610	MRPS23	mitochondrial ribosomal protein S23
chr17	57899582	57900178	*	+ 2 fold & sig. in both	E2 vs DMSO	1.14989923291828	2.57704122730198e-07	Intron (ENST00000577830.6/404093, intron 1 of 10)	3211	ENSG00000180891	CUEDC1	CUE domain containing 1
chr17	62759921	62760736	*	+ 2 fold & sig. in both	E2 vs DMSO	1.20713003286995	1.42799464333901e-06	Promoter	0	ENSG00000173838	MARCHF10	membrane associated ring-CH-type finger 10
chr17	65243593	65244218	*	+ 2 fold & sig. in both	E2 vs DMSO	1.04985308374206	1.56618198078421e-06	Distal Intergenic	54889	ENSG00000108370	RGS9	regulator of G protein signaling 9
chr17	6676002	6676813	*	+ 2 fold & sig. in both	E2 vs DMSO	1.37445425932681	3.99586923906373e-05	Intron (ENST00000635042.1/ENST00000635042.1, intron 1 of 1)	14071	ENSG00000141485	SLC13A5	solute carrier family 13 member 5
chr17	66933193	66933838	*	+ 2 fold & sig. in both	E2 vs DMSO	2.24826309335262	5.63422988699582e-07	Distal Intergenic	-30869	ENSG00000075461	CACNG4	calcium voltage-gated channel auxiliary subunit gamma 4
chr17	67467527	67468291	*	+ 2 fold & sig. in both	E2 vs DMSO	1.99182676838825	8.89179791858931e-08	Intron (ENST00000581322.6/26207, intron 1 of 8)	-3198	ENSG00000207688	MIR548AA2	microRNA 548aa-2
chr17	67555240	67555523	*	+ 2 fold & sig. in both	E2 vs DMSO	1.15605836219934	0.0072495899958027	Intron (ENST00000581322.6/26207, intron 4 of 8)	2054	ENSG00000154217	PITPNC1	phosphatidylinositol transfer protein cytoplasmic 1
chr17	69424732	69424990	*	+ 2 fold & sig. in both	E2 vs DMSO	1.06169052708194	0.0405290943263228	Intron (ENST00000590474.7/5608, intron 1 of 11)	9898	ENSG00000108984	MAP2K6	mitogen-activated protein kinase kinase 6
chr17	72617696	72618651	*	+ 2 fold & sig. in both	E2 vs DMSO	1.08983989902741	5.0957317863427e-06	Promoter	0	ENSG00000227036	LINC00673	long intergenic non-protein coding RNA 673
chr17	73507470	73507982	*	+ 2 fold & sig. in both	E2 vs DMSO	1.33952457246317	2.90281947819214e-05	Promoter	0	ENSG00000069188	SDK2	sidekick cell adhesion molecule 2
chr17	74749820	74750100	*	+ 2 fold & sig. in both	E2 vs DMSO	1.04731740881204	0.0033369070165001	Promoter	-908	NA	SLC9A3R1-AS1	SLC9A3R1 antisense RNA 1
chr17	74758871	74759082	*	+ 2 fold & sig. in both	E2 vs DMSO	1.02565250964007	0.000480844988335949	Intron (ENST00000262613.10/9368, intron 1 of 5)	-2921	ENSG00000109062	SLC9A3R1	SLC9A3 regulator 1
chr17	74760521	74761129	*	+ 2 fold & sig. in both	E2 vs DMSO	2.0914277912611	1.5725061905176e-09	Promoter	-874	ENSG00000109062	SLC9A3R1	SLC9A3 regulator 1
chr17	74769702	74771051	*	+ 2 fold & sig. in both	E2 vs DMSO	1.03909597734253	5.2289858916155e-06	3' UTR	1418	ENSG00000109065	NAT9	N-acetyltransferase 9 (putative)
chr17	74776069	74776402	*	+ 2 fold & sig. in both	E2 vs DMSO	1.11625609634451	0.000158615233194139	Promoter	0	ENSG00000109065	NAT9	N-acetyltransferase 9 (putative)
chr17	77435284	77435848	*	+ 2 fold & sig. in both	E2 vs DMSO	1.03215706824786	0.00445595236422869	Intron (ENST00000591198.5/10801, intron 2 of 10)	8328	ENSG00000184640	SEPTIN9	septin 9
chr17	7951562	7952317	*	+ 2 fold & sig. in both	E2 vs DMSO	1.70535978866279	3.21819333791692e-07	Distal Intergenic	3938	ENSG00000170037	CNTROB	centrobin, centriole duplication and spindle assembly protein
chr17	7957634	7958152	*	+ 2 fold & sig. in both	E2 vs DMSO	1.16035831479988	0.00485069630289745	Distal Intergenic	10010	ENSG00000170037	CNTROB	centrobin, centriole duplication and spindle assembly protein
chr17	80394620	80395120	*	+ 2 fold & sig. in both	E2 vs DMSO	1.56977660608931	4.12133716470066e-07	3' UTR	6090	ENSG00000173821	RNF213	ring finger protein 213
chr17	82613924	82614203	*	+ 2 fold & sig. in both	E2 vs DMSO	1.21026429173515	0.00330208684455879	Intron (ENST00000574694.1/ENST00000574694.1, intron 1 of 1)	3316	ENSG00000141580	WDR45B	WD repeat domain 45B
chr18	10070358	10070839	*	+ 2 fold & sig. in both	E2 vs DMSO	1.47621709935828	0.000217252887836729	Distal Intergenic	-14999	NA	LOC105371984	uncharacterized LOC105371984
chr18	10094213	10094549	*	+ 2 fold & sig. in both	E2 vs DMSO	1.41635823107787	0.000910022724209267	Intron (ENST00000685786.1/105371984, intron 1 of 1)	8375	NA	LOC105371984	uncharacterized LOC105371984
chr18	10259706	10260459	*	+ 2 fold & sig. in both	E2 vs DMSO	1.25627305869367	0.000215954948122519	Distal Intergenic	111902	NA	LOC105371986	uncharacterized LOC105371986
chr18	10893212	10893567	*	+ 2 fold & sig. in both	E2 vs DMSO	1.0478818246831	0.0281994781616812	Intron (ENST00000302079.10/63895, intron 4 of 50)	-2520	ENSG00000154864	PIEZO2	piezo type mechanosensitive ion channel component 2
chr18	11269019	11269283	*	+ 2 fold & sig. in both	E2 vs DMSO	2.44496207382066	0.000180719498382387	Distal Intergenic	109126	NA	LOC107985173	uncharacterized LOC107985173
chr18	13394897	13395210	*	+ 2 fold & sig. in both	E2 vs DMSO	1.13307995577568	0.00882586283034322	Intron (ENST00000679177.1/753, intron 3 of 5)	7556	ENSG00000168675	LDLRAD4	low density lipoprotein receptor class A domain containing 4
chr18	13567844	13568105	*	+ 2 fold & sig. in both	E2 vs DMSO	1.07238938447703	0.0205381529330783	Intron (ENST00000679177.1/753, intron 3 of 5)	25552	ENSG00000168675	LDLRAD4	low density lipoprotein receptor class A domain containing 4
chr18	21270517	21270927	*	+ 2 fold & sig. in both	E2 vs DMSO	1.1928139055146	0.0241902820272322	Intron (ENST00000424526.7/80000, intron 1 of 32)	28159	ENSG00000141449	GREB1L	GREB1 like retinoic acid receptor coactivator
chr18	21327131	21327530	*	+ 2 fold & sig. in both	E2 vs DMSO	1.00104319137732	0.00378399160219748	Intron (ENST00000424526.7/80000, intron 1 of 32)	-36063	ENSG00000141449	GREB1L	GREB1 like retinoic acid receptor coactivator
chr18	21330091	21330733	*	+ 2 fold & sig. in both	E2 vs DMSO	1.34521043119149	7.00358601292475e-06	Intron (ENST00000424526.7/80000, intron 1 of 32)	-32860	ENSG00000141449	GREB1L	GREB1 like retinoic acid receptor coactivator
chr18	22871664	22872198	*	+ 2 fold & sig. in both	E2 vs DMSO	1.64964192606919	1.20354280535089e-05	Intron (ENST00000583700.5/5932, intron 1 of 4)	35523	ENSG00000266850	LOC101927571	uncharacterized LOC101927571
chr18	23257820	23258322	*	+ 2 fold & sig. in both	E2 vs DMSO	1.29820092703758	3.10559253425169e-06	3' UTR	72893	ENSG00000134490	TMEM241	transmembrane protein 241
chr18	23401505	23401892	*	+ 2 fold & sig. in both	E2 vs DMSO	1.28570934831056	0.00015830728731429	Intron (ENST00000581444.5/85019, intron 3 of 15)	-31224	ENSG00000134490	TMEM241	transmembrane protein 241
chr18	23627327	23627654	*	+ 2 fold & sig. in both	E2 vs DMSO	1.49463902287914	3.15925253811823e-05	Intron (ENST00000592179.6/147463, intron 6 of 9)	2266	ENSG00000154065	ANKRD29	ankyrin repeat domain 29
chr18	23629369	23629918	*	+ 2 fold & sig. in both	E2 vs DMSO	1.16535876744839	3.52153770503307e-05	Promoter	2	ENSG00000154065	ANKRD29	ankyrin repeat domain 29
chr18	23722590	23723064	*	+ 2 fold & sig. in both	E2 vs DMSO	1.0504822826066	3.28121778084928e-05	Intron (ENST00000313654.14/3909, intron 2 of 74)	32906	ENSG00000053747	LAMA3	laminin subunit alpha 3
chr18	24051320	24051975	*	+ 2 fold & sig. in both	E2 vs DMSO	1.07642141431174	0.00129349695180019	Intron (ENST00000304621.10/125488, intron 1 of 13)	34686	ENSG00000168234	TTC39C	tetratricopeptide repeat domain 39C
chr18	24339362	24339806	*	+ 2 fold & sig. in both	E2 vs DMSO	1.17521400975876	0.00783557145495902	Intron (ENST00000319481.8/114876, intron 5 of 27)	17676	NA	MIR320C2	microRNA 320c-2
chr18	2627783	2628414	*	+ 2 fold & sig. in both	E2 vs DMSO	1.1397971764061	0.010667175492628	Distal Intergenic	17002	ENSG00000080986	NDC80	NDC80 kinetochore complex component
chr18	36099185	36099725	*	+ 2 fold & sig. in both	E2 vs DMSO	1.14434145824596	5.50000750534578e-05	Distal Intergenic	22390	ENSG00000141424	SLC39A6	solute carrier family 39 member 6
chr18	39523178	39523677	*	+ 2 fold & sig. in both	E2 vs DMSO	1.06373892719891	2.08719743546716e-05	Intron (ENST00000669399.1/647946, intron 2 of 3)	11846	ENSG00000267374	MIR924HG	MIR924 host gene
chr18	43876694	43877148	*	+ 2 fold & sig. in both	E2 vs DMSO	1.24237084513956	0.000502347254636415	Distal Intergenic	-337823	NA	NA	NA
chr18	46113711	46114264	*	+ 2 fold & sig. in both	E2 vs DMSO	1.15804432646075	0.000460723379463795	Promoter	-804	ENSG00000152240	HAUS1	HAUS augmin like complex subunit 1
chr18	48990532	48991323	*	+ 2 fold & sig. in both	E2 vs DMSO	1.88338739774011	1.17032606302845e-07	Distal Intergenic	-26591	NA	LOC105372108	uncharacterized LOC105372108
chr18	51491559	51492060	*	+ 2 fold & sig. in both	E2 vs DMSO	1.51341401859639	0.000221283443292652	Intron (ENST00000635503.2/ENST00000635503.2, intron 3 of 3)	-68761	ENSG00000227115	LINC01630	long intergenic non-protein coding RNA 1630
chr18	57141376	57141937	*	+ 2 fold & sig. in both	E2 vs DMSO	1.29579296619855	3.30219882324491e-05	Exon (ENST00000590942.1/ENST00000590942.1, exon 2 of 3)	-5150	ENSG00000228075	BOD1L2	biorientation of chromosomes in cell division 1 like 2
chr18	57242361	57242680	*	+ 2 fold & sig. in both	E2 vs DMSO	1.44410144208055	0.00204251788954624	Distal Intergenic	-71167	ENSG00000267726	LINC02565	long intergenic non-protein coding RNA 2565
chr18	57793615	57794020	*	+ 2 fold & sig. in both	E2 vs DMSO	1.91670511163939	1.89653242901636e-06	Intron (ENST00000648908.2/5205, intron 1 of 27)	7968	ENSG00000081923	ATP8B1	ATPase phospholipid transporting 8B1
chr18	60053705	60054367	*	+ 2 fold & sig. in both	E2 vs DMSO	1.24563790882515	7.62918447721803e-07	Distal Intergenic	153669	ENSG00000141682	PMAIP1	phorbol-12-myristate-13-acetate-induced protein 1
chr18	76668138	76668472	*	+ 2 fold & sig. in both	E2 vs DMSO	1.00944909597758	0.0207696248962166	Intron (ENST00000670438.1/284276, intron 2 of 2)	-17586	ENSG00000276397	LINC01879	long intergenic non-protein coding RNA 1879
chr18	77115014	77115443	*	+ 2 fold & sig. in both	E2 vs DMSO	1.12624134692686	0.0103075552664494	Exon (ENST00000611482.1/ENST00000611482.1, exon 1 of 1)	-9753	ENSG00000197971	MBP	myelin basic protein
chr18	9705085	9705688	*	+ 2 fold & sig. in both	E2 vs DMSO	1.5685788795748	1.04123464932963e-06	Distal Intergenic	-2587	ENSG00000168461	RAB31	RAB31, member RAS oncogene family
chr18	9757604	9758499	*	+ 2 fold & sig. in both	E2 vs DMSO	1.31387181930925	3.04159686026932e-06	3' UTR	-16788	ENSG00000168461	RAB31	RAB31, member RAS oncogene family
chr19	11420243	11420700	*	+ 2 fold & sig. in both	E2 vs DMSO	1.36705930628975	8.62167075929721e-05	Promoter	-915	ENSG00000205517	RGL3	ral guanine nucleotide dissociation stimulator like 3
chr19	11476976	11477241	*	+ 2 fold & sig. in both	E2 vs DMSO	1.30467425472137	0.00493677663754702	Intron (ENST00000359227.8/1995, intron 1 of 6)	3384	ENSG00000196361	ELAVL3	ELAV like RNA binding protein 3
chr19	17240021	17240476	*	+ 2 fold & sig. in both	E2 vs DMSO	1.1305675397163	0.0126372566467023	Intron (ENST00000291442.4/2063, intron 2 of 3)	4028	ENSG00000160113	NR2F6	nuclear receptor subfamily 2 group F member 6
chr19	18832641	18833102	*	+ 2 fold & sig. in both	E2 vs DMSO	1.29542216214918	0.00051576166940244	Promoter	-28	ENSG00000005007	UPF1	UPF1 RNA helicase and ATPase
chr19	19549770	19550331	*	+ 2 fold & sig. in both	E2 vs DMSO	1.56537570335402	1.52803874251947e-06	Distal Intergenic	9111	ENSG00000160161	CILP2	cartilage intermediate layer protein 2
chr19	30698507	30699070	*	+ 2 fold & sig. in both	E2 vs DMSO	1.29166325585719	2.0812240752753e-05	Intron (ENST00000706143.1/9745, intron 5 of 5)	-29860	NA	NA	NA
chr19	31369213	31369785	*	+ 2 fold & sig. in both	E2 vs DMSO	1.12158204251876	0.00082538054453928	Intron (ENST00000585336.1/107985311, intron 2 of 3)	-19777	ENSG00000121297	TSHZ3	teashirt zinc finger homeobox 3
chr19	31451706	31452448	*	+ 2 fold & sig. in both	E2 vs DMSO	1.01013578770331	0.00139894407296011	Distal Intergenic	-67707	ENSG00000267407	LINC02841	long intergenic non-protein coding RNA 2841
chr19	32322499	32323072	*	+ 2 fold & sig. in both	E2 vs DMSO	1.38826959561411	1.59429763253984e-05	Distal Intergenic	-22522	ENSG00000168813	ZNF507	zinc finger protein 507
chr19	33629363	33629860	*	+ 2 fold & sig. in both	E2 vs DMSO	2.06923743481058	8.06436234336099e-08	Intron (ENST00000650847.1/64377, intron 1 of 4)	7379	ENSG00000124302	CHST8	carbohydrate sulfotransferase 8
chr19	3389829	3390353	*	+ 2 fold & sig. in both	E2 vs DMSO	1.23911001363243	2.20400890916647e-05	Intron (ENST00000641145.1/4782, intron 2 of 10)	-20243	ENSG00000141905	NFIC	nuclear factor I C
chr19	38298909	38299637	*	+ 2 fold & sig. in both	E2 vs DMSO	1.37376525151187	1.70532182846106e-07	Intron (ENST00000587519.4/64073, intron 3 of 5)	-4527	ENSG00000167644	C19orf33	chromosome 19 open reading frame 33
chr19	38321566	38322223	*	+ 2 fold & sig. in both	E2 vs DMSO	2.17486998613362	1.36261120216801e-08	Intron (ENST00000263372.5/9424, intron 1 of 2)	1323	ENSG00000099337	KCNK6	potassium two pore domain channel subfamily K member 6
chr19	38714286	38714978	*	+ 2 fold & sig. in both	E2 vs DMSO	1.56439559488411	2.92477323980689e-07	Exon (ENST00000588618.5/81, exon 9 of 12)	3453	ENSG00000130402	ACTN4	actinin alpha 4
chr19	39070699	39071268	*	+ 2 fold & sig. in both	E2 vs DMSO	1.04531556012394	0.0396475957350696	Distal Intergenic	-12645	ENSG00000183760	ACP7	acid phosphatase 7, tartrate resistant (putative)
chr19	39130328	39130839	*	+ 2 fold & sig. in both	E2 vs DMSO	1.80963720511467	3.03413445429539e-07	Intron (ENST00000602004.1/10298, intron 1 of 2)	4494	ENSG00000130669	PAK4	p21 (RAC1) activated kinase 4
chr19	40480082	40480783	*	+ 2 fold & sig. in both	E2 vs DMSO	2.0061315812158	6.07547217640469e-09	Intron (ENST00000595535.5/57731, intron 2 of 26)	13081	ENSG00000160460	SPTBN4	spectrin beta, non-erythrocytic 4
chr19	4706621	4707653	*	+ 2 fold & sig. in both	E2 vs DMSO	1.52067994839854	2.34543147377432e-07	Intron (ENST00000646573.2/91039, intron 2 of 20)	-2470	ENSG00000142002	DPP9	dipeptidyl peptidase 9
chr19	4715628	4716192	*	+ 2 fold & sig. in both	E2 vs DMSO	1.19022003168389	0.000176290160683328	Promoter	0	ENSG00000142002	DPP9	dipeptidyl peptidase 9
chr19	4970502	4971138	*	+ 2 fold & sig. in both	E2 vs DMSO	1.8068776875723	3.36202164356999e-06	Intron (ENST00000611640.4/23030, intron 1 of 23)	1370	ENSG00000127663	KDM4B	lysine demethylase 4B
chr19	4991537	4992362	*	+ 2 fold & sig. in both	E2 vs DMSO	1.11345122706923	0.000317844907523449	Intron (ENST00000611640.4/23030, intron 1 of 23)	22405	ENSG00000127663	KDM4B	lysine demethylase 4B
chr19	5021039	5021545	*	+ 2 fold & sig. in both	E2 vs DMSO	1.44972547437792	0.000245390157718987	Intron (ENST00000611640.4/23030, intron 2 of 23)	4714	ENSG00000127663	KDM4B	lysine demethylase 4B
chr19	56282716	56283093	*	+ 2 fold & sig. in both	E2 vs DMSO	1.15858021920546	0.0234509865686298	Exon (ENST00000593116.5/124900420, exon 2 of 6)	-1041	NA	NA	NA
chr19	7421847	7422357	*	+ 2 fold & sig. in both	E2 vs DMSO	1.12464352636004	3.27888145557871e-05	Intron (ENST00000668164.2/23370, intron 10 of 28)	-17331	ENSG00000104880	ARHGEF18	Rho/Rac guanine nucleotide exchange factor 18
chr2	101388257	101388661	*	+ 2 fold & sig. in both	E2 vs DMSO	1.08112613568275	0.000307932686496615	Promoter	-754	ENSG00000175874	CREG2	cellular repressor of E1A stimulated genes 2
chr2	101416777	101417206	*	+ 2 fold & sig. in both	E2 vs DMSO	1.29889112624106	0.000572101759073409	Intron (ENST00000428343.6/731220, intron 6 of 11)	17900	ENSG00000196460	RFX8	regulatory factor X8
chr2	105522484	105523151	*	+ 2 fold & sig. in both	E2 vs DMSO	1.42599080515475	5.7078591457157e-06	Distal Intergenic	-83971	ENSG00000115641	FHL2	four and a half LIM domains 2
chr2	106147078	106147552	*	+ 2 fold & sig. in both	E2 vs DMSO	1.24326948796748	0.00210201544955601	Intron (ENST00000283148.12/80146, intron 5 of 14)	-8197	ENSG00000115652	UXS1	UDP-glucuronate decarboxylase 1
chr2	108295269	108296216	*	+ 2 fold & sig. in both	E2 vs DMSO	1.06201547032231	0.001132112928964	Intron (ENST00000326853.9/6819, intron 3 of 8)	1582	ENSG00000198203	SULT1C2	sulfotransferase family 1C member 2
chr2	111932813	111933290	*	+ 2 fold & sig. in both	E2 vs DMSO	1.00166410354096	0.00319313343224231	Intron (ENST00000295408.9/10461, intron 2 of 18)	34149	ENSG00000153208	MERTK	MER proto-oncogene, tyrosine kinase
chr2	11498449	11499007	*	+ 2 fold & sig. in both	E2 vs DMSO	1.39769319715112	2.60552699146308e-06	Intron (ENST00000628795.2/9687, intron 1 of 2)	16108	ENSG00000196208	GREB1	growth regulating estrogen receptor binding 1
chr2	11512472	11513356	*	+ 2 fold & sig. in both	E2 vs DMSO	2.47061928521062	1.38362705371145e-09	Intron (ENST00000628795.2/9687, intron 1 of 2)	-20689	ENSG00000196208	GREB1	growth regulating estrogen receptor binding 1
chr2	11524217	11524872	*	+ 2 fold & sig. in both	E2 vs DMSO	2.66791385140859	1.00042977004107e-08	Intron (ENST00000628795.2/9687, intron 1 of 2)	-9173	ENSG00000196208	GREB1	growth regulating estrogen receptor binding 1
chr2	11530771	11531444	*	+ 2 fold & sig. in both	E2 vs DMSO	1.11334257041706	1.23404526443131e-07	Intron (ENST00000628795.2/9687, intron 1 of 2)	-2601	ENSG00000196208	GREB1	growth regulating estrogen receptor binding 1
chr2	11532225	11532944	*	+ 2 fold & sig. in both	E2 vs DMSO	1.03477405858106	8.66913270225156e-07	Intron (ENST00000628795.2/9687, intron 1 of 2)	-1101	ENSG00000196208	GREB1	growth regulating estrogen receptor binding 1
chr2	11539305	11540235	*	+ 2 fold & sig. in both	E2 vs DMSO	1.55712195106175	3.39729285769269e-08	Promoter	0	ENSG00000196208	GREB1	growth regulating estrogen receptor binding 1
chr2	11542442	11542773	*	+ 2 fold & sig. in both	E2 vs DMSO	1.23055056439954	7.36549919143438e-05	Promoter	0	ENSG00000196208	GREB1	growth regulating estrogen receptor binding 1
chr2	11543786	11544073	*	+ 2 fold & sig. in both	E2 vs DMSO	1.57255755459022	2.20164298734156e-06	Intron (ENST00000628795.2/9687, intron 1 of 2)	1061	ENSG00000196208	GREB1	growth regulating estrogen receptor binding 1
chr2	11612037	11612327	*	+ 2 fold & sig. in both	E2 vs DMSO	1.24815822989087	0.00311256973543711	Promoter	0	ENSG00000196208	GREB1	growth regulating estrogen receptor binding 1
chr2	11648312	11648847	*	+ 2 fold & sig. in both	E2 vs DMSO	1.34647392958412	2.03239013064393e-05	Distal Intergenic	21348	ENSG00000169006	NTSR2	neurotensin receptor 2
chr2	128277672	128278281	*	+ 2 fold & sig. in both	E2 vs DMSO	2.07947690326861	6.3794318341315e-08	Intron (ENST00000469019.1/9394, intron 1 of 2)	11915	ENSG00000136720	HS6ST1	heparan sulfate 6-O-sulfotransferase 1
chr2	129945426	129946028	*	+ 2 fold & sig. in both	E2 vs DMSO	1.39297414634848	0.00191441617028667	Exon (ENST00000450840.1/101927924, exon 4 of 4)	-11086	ENSG00000214100	PLAC9P1	placenta associated 9 pseudogene 1
chr2	132876800	132877505	*	+ 2 fold & sig. in both	E2 vs DMSO	1.02617905016671	0.00205986134856038	Intron (ENST00000409261.6/344148, intron 9 of 19)	-38052	ENSG00000233729	NCKAP5-AS1	NCKAP5 antisense RNA 1
chr2	133492790	133493367	*	+ 2 fold & sig. in both	E2 vs DMSO	1.74362871836287	2.17237364008356e-07	Intron (ENST00000409261.6/344148, intron 3 of 19)	24146	ENSG00000176771	NCKAP5	NCK associated protein 5
chr2	134068355	134068834	*	+ 2 fold & sig. in both	E2 vs DMSO	1.37491623199715	4.8581326204426e-06	Distal Intergenic	-51149	ENSG00000152127	MGAT5	alpha-1,6-mannosylglycoprotein 6-beta-N-acetylglucosaminyltransferase
chr2	135245106	135245661	*	+ 2 fold & sig. in both	E2 vs DMSO	1.15445498700965	9.37941040267116e-05	Intron (ENST00000401392.5/84083, intron 12 of 20)	-6245	ENSG00000121988	ZRANB3	zinc finger RANBP2-type containing 3
chr2	136293893	136294442	*	+ 2 fold & sig. in both	E2 vs DMSO	1.56108493354572	2.7621564324183e-06	Distal Intergenic	-174716	ENSG00000121966	CXCR4	C-X-C motif chemokine receptor 4
chr2	138720147	138720750	*	+ 2 fold & sig. in both	E2 vs DMSO	1.89631100325957	4.62877139480094e-08	Intron (ENST00000272641.4/11249, intron 1 of 1)	59640	ENSG00000144227	NXPH2	neurexophilin 2
chr2	139773307	139774016	*	+ 2 fold & sig. in both	E2 vs DMSO	1.06940822010524	8.90971484901864e-05	Distal Intergenic	261883	NA	NA	NA
chr2	140567755	140568081	*	+ 2 fold & sig. in both	E2 vs DMSO	1.24980606172956	0.0131061806374988	Intron (ENST00000389484.8/53353, intron 43 of 90)	18604	ENSG00000283506	MIR7157	microRNA 7157
chr2	148607438	148608042	*	+ 2 fold & sig. in both	E2 vs DMSO	1.58158945477769	1.47335999957802e-06	Distal Intergenic	-36398	ENSG00000135999	EPC2	enhancer of polycomb homolog 2
chr2	158507170	158507617	*	+ 2 fold & sig. in both	E2 vs DMSO	1.17054591855009	2.78919887690052e-05	Intron (ENST00000389759.8/8502, intron 1 of 21)	-25568	ENSG00000144283	PKP4	plakophilin 4
chr2	158723470	158723860	*	+ 2 fold & sig. in both	E2 vs DMSO	1.17679150181663	1.06303566826384e-05	Promoter	120	ENSG00000204380	PKP4-AS1	PKP4 antisense RNA 1
chr2	159153589	159154040	*	+ 2 fold & sig. in both	E2 vs DMSO	1.6666146693547	4.15129317967183e-05	Intron (ENST00000263635.8/85461, intron 7 of 26)	6049	ENSG00000115183	TANC1	tetratricopeptide repeat, ankyrin repeat and coiled-coil containing 1
chr2	160634458	160634851	*	+ 2 fold & sig. in both	E2 vs DMSO	1.24299409976726	0.000225821553813396	Distal Intergenic	-140651	ENSG00000153250	RBMS1	RNA binding motif single stranded interacting protein 1
chr2	163626607	163627052	*	+ 2 fold & sig. in both	E2 vs DMSO	1.57681987267379	2.41740047021995e-05	Intron (ENST00000409634.5/55137, intron 2 of 2)	108932	ENSG00000182263	FIGN	fidgetin, microtubule severing factor
chr2	16506144	16506777	*	+ 2 fold & sig. in both	E2 vs DMSO	1.13224127721994	1.28135704621615e-05	Distal Intergenic	-27521	NA	LOC105373444	uncharacterized LOC105373444
chr2	170238757	170239188	*	+ 2 fold & sig. in both	E2 vs DMSO	1.00519619641815	0.000157612345511556	Intron (ENST00000409940.6/140469, intron 7 of 29)	39505	ENSG00000071909	MYO3B	myosin IIIB
chr2	170307047	170307443	*	+ 2 fold & sig. in both	E2 vs DMSO	1.2873618942414	0.000389400323328506	Intron (ENST00000409940.6/140469, intron 7 of 29)	33810	NA	NA	NA
chr2	173972416	173973062	*	+ 2 fold & sig. in both	E2 vs DMSO	1.00952798133111	0.00120651101549199	Distal Intergenic	-7043	ENSG00000172845	SP3	Sp3 transcription factor
chr2	174198649	174199195	*	+ 2 fold & sig. in both	E2 vs DMSO	1.47860633612496	1.79791222588445e-06	Intron (ENST00000284719.8/29789, intron 4 of 10)	18751	ENSG00000138430	OLA1	Obg like ATPase 1
chr2	174264061	174264339	*	+ 2 fold & sig. in both	E2 vs DMSO	1.0068803486806	0.0230761025083338	Distal Intergenic	-15462	ENSG00000138430	OLA1	Obg like ATPase 1
chr2	176845601	176846117	*	+ 2 fold & sig. in both	E2 vs DMSO	1.3736453386715	1.39334378371275e-06	Exon (ENST00000664565.1/105373757, exon 2 of 5)	2724	ENSG00000227098	LOC105373757	uncharacterized LOC105373757
chr2	179574203	179574666	*	+ 2 fold & sig. in both	E2 vs DMSO	1.32815407061858	0.00283420303070125	Intron (ENST00000466398.5/151126, intron 3 of 12)	9401	ENSG00000144331	ZNF385B	zinc finger protein 385B
chr2	185187331	185187968	*	+ 2 fold & sig. in both	E2 vs DMSO	1.04135323919205	2.00381108727617e-05	Distal Intergenic	-237095	NA	NA	NA
chr2	187986351	187987014	*	+ 2 fold & sig. in both	E2 vs DMSO	1.09766354658108	0.000524490290720198	Intron (ENST00000434418.2/104355152, intron 3 of 3)	300620	ENSG00000231689	LINC01090	long intergenic non-protein coding RNA 1090
chr2	199228986	199229563	*	+ 2 fold & sig. in both	E2 vs DMSO	1.32585157179666	2.74309002994845e-05	Distal Intergenic	99470	ENSG00000119042	SATB2	SATB homeobox 2
chr2	201985579	201986291	*	+ 2 fold & sig. in both	E2 vs DMSO	1.53928520152318	6.27576631804362e-06	Distal Intergenic	-47564	ENSG00000155760	FZD7	frizzled class receptor 7
chr2	20381364	20381827	*	+ 2 fold & sig. in both	E2 vs DMSO	1.26340645180617	5.20650678191955e-06	Distal Intergenic	-29130	ENSG00000055917	PUM2	pumilio RNA binding family member 2
chr2	207082535	207082966	*	+ 2 fold & sig. in both	E2 vs DMSO	1.02834746119741	0.0176245595542085	Intron (ENST00000309446.11/8609, intron 3 of 3)	27107	ENSG00000253008	MIR2355	microRNA 2355
chr2	207330896	207331247	*	+ 2 fold & sig. in both	E2 vs DMSO	1.09008667328723	0.0230129037808312	Intron (ENST00000412387.5/124907970, intron 4 of 4)	-61472	ENSG00000221628	MIR1302-4	microRNA 1302-4
chr2	207394781	207395362	*	+ 2 fold & sig. in both	E2 vs DMSO	1.32883891428483	1.58214389634522e-05	Intron (ENST00000412387.5/124907970, intron 3 of 4)	-125357	ENSG00000221628	MIR1302-4	microRNA 1302-4
chr2	211422998	211423530	*	+ 2 fold & sig. in both	E2 vs DMSO	1.43477125506717	6.62470182313359e-06	Intron (ENST00000402597.6/2066, intron 22 of 25)	241824	ENSG00000178568	ERBB4	erb-b2 receptor tyrosine kinase 4
chr2	211435139	211435752	*	+ 2 fold & sig. in both	E2 vs DMSO	1.62859752046633	6.3794318341315e-08	Intron (ENST00000402597.6/2066, intron 19 of 25)	229602	ENSG00000178568	ERBB4	erb-b2 receptor tyrosine kinase 4
chr2	214394934	214395422	*	+ 2 fold & sig. in both	E2 vs DMSO	1.23982405315596	0.000798117538543336	Intron (ENST00000406979.6/79582, intron 17 of 17)	-15632	ENSG00000174453	VWC2L	von Willebrand factor C domain containing 2 like
chr2	217092635	217093066	*	+ 2 fold & sig. in both	E2 vs DMSO	1.43141609640271	3.1986600348061e-05	Intron (ENST00000695932.1/105373877, intron 3 of 11)	-27817	NA	LOC105373873	uncharacterized LOC105373873
chr2	217247415	217247959	*	+ 2 fold & sig. in both	E2 vs DMSO	1.46726921355128	7.62918447721803e-07	Intron (ENST00000695932.1/105373877, intron 3 of 11)	-13740	NA	DIRC3-AS1	DIRC3 antisense RNA 1
chr2	217366872	217367868	*	+ 2 fold & sig. in both	E2 vs DMSO	1.29161516033482	6.79820784323124e-06	Intron (ENST00000474063.5/729582, intron 7 of 11)	-30254	NA	DIRC3	disrupted in renal carcinoma 3
chr2	217387668	217388531	*	+ 2 fold & sig. in both	E2 vs DMSO	1.17244974047142	4.56415122296409e-07	Intron (ENST00000474063.5/729582, intron 7 of 11)	36991	NA	DIRC3	disrupted in renal carcinoma 3
chr2	217653201	217653726	*	+ 2 fold & sig. in both	E2 vs DMSO	1.0215556424116	1.9809890460932e-06	Intron (ENST00000676082.1/729582, intron 1 of 9)	-28620	NA	DIRC3	disrupted in renal carcinoma 3
chr2	217980070	217980408	*	+ 2 fold & sig. in both	E2 vs DMSO	1.38392813767754	0.000587339575351914	Intron (ENST00000450996.1/105373878, intron 1 of 3)	-1136	ENSG00000079308	TNS1	tensin 1
chr2	223465867	223466168	*	+ 2 fold & sig. in both	E2 vs DMSO	1.18154756637604	0.0279370258028361	Distal Intergenic	-32605	NA	LOC105373907	uncharacterized LOC105373907
chr2	225615511	225615942	*	+ 2 fold & sig. in both	E2 vs DMSO	1.08153458913603	0.000308209205686421	Intron (ENST00000636099.1/57624, intron 5 of 6)	32603	ENSG00000144460	NYAP2	neuronal tyrosine-phosphorylated phosphoinositide-3-kinase adaptor 2
chr2	225616342	225616816	*	+ 2 fold & sig. in both	E2 vs DMSO	1.26949277432478	0.000260458973757854	Intron (ENST00000636099.1/57624, intron 5 of 6)	33434	ENSG00000144460	NYAP2	neuronal tyrosine-phosphorylated phosphoinositide-3-kinase adaptor 2
chr2	225646552	225647040	*	+ 2 fold & sig. in both	E2 vs DMSO	1.94110053081723	0.00017791137811192	Intron (ENST00000636099.1/57624, intron 6 of 6)	63644	ENSG00000144460	NYAP2	neuronal tyrosine-phosphorylated phosphoinositide-3-kinase adaptor 2
chr2	226131255	226131669	*	+ 2 fold & sig. in both	E2 vs DMSO	1.00083502937752	0.00555946010537936	Distal Intergenic	527124	ENSG00000263363	MIR5702	microRNA 5702
chr2	231520111	231520575	*	+ 2 fold & sig. in both	E2 vs DMSO	1.14831728499333	0.000524334442808463	Promoter	492	ENSG00000171596	NMUR1	neuromedin U receptor 1
chr2	231706039	231706662	*	+ 2 fold & sig. in both	E2 vs DMSO	1.14399675393152	4.88157078298259e-06	Promoter	-233	ENSG00000187514	PTMA	prothymosin alpha
chr2	232511545	232511886	*	+ 2 fold & sig. in both	E2 vs DMSO	1.24255337087664	0.0070050363941516	Distal Intergenic	-8502	ENSG00000237412	PRSS56	serine protease 56
chr2	234549086	234549503	*	+ 2 fold & sig. in both	E2 vs DMSO	1.30868872896555	0.000326946987083462	Distal Intergenic	-52005	ENSG00000188042	ARL4C	ADP ribosylation factor like GTPase 4C
chr2	236117921	236118346	*	+ 2 fold & sig. in both	E2 vs DMSO	1.04321033580523	0.0104375899630377	Intron (ENST00000304032.13/116987, intron 16 of 17)	48983	ENSG00000168505	GBX2	gastrulation brain homeobox 2
chr2	236359568	236360204	*	+ 2 fold & sig. in both	E2 vs DMSO	1.18255597858903	0.000388593606820049	Intron (ENST00000431676.6/79781, intron 15 of 18)	-12817	ENSG00000132321	IQCA1	IQ motif containing with AAA domain 1
chr2	236592714	236593321	*	+ 2 fold & sig. in both	E2 vs DMSO	1.04334190819415	4.36327107636986e-05	Distal Intergenic	22889	ENSG00000144476	ACKR3	atypical chemokine receptor 3
chr2	236967102	236967573	*	+ 2 fold & sig. in both	E2 vs DMSO	1.31283133273914	0.00131831595575918	Intron (ENST00000662924.1/105373951, intron 1 of 2)	88594	ENSG00000124835	LOC93463	uncharacterized LOC93463
chr2	237041270	237041719	*	+ 2 fold & sig. in both	E2 vs DMSO	1.75138057221425	2.61718359566359e-07	Intron (ENST00000662924.1/105373951, intron 1 of 2)	14448	ENSG00000124835	LOC93463	uncharacterized LOC93463
chr2	237043914	237044719	*	+ 2 fold & sig. in both	E2 vs DMSO	1.71660174865267	2.02939684062166e-07	Intron (ENST00000662924.1/105373951, intron 1 of 2)	11448	ENSG00000124835	LOC93463	uncharacterized LOC93463
chr2	237075795	237076499	*	+ 2 fold & sig. in both	E2 vs DMSO	1.4938859085443	1.15661607353025e-06	Intron (ENST00000662924.1/105373951, intron 1 of 2)	8294	NA	LOC105373951	uncharacterized LOC105373951
chr2	237235185	237235747	*	+ 2 fold & sig. in both	E2 vs DMSO	1.77314000757937	4.02693584753732e-07	Distal Intergenic	-21344	NA	LOC105373953	uncharacterized LOC105373953
chr2	237496336	237496911	*	+ 2 fold & sig. in both	E2 vs DMSO	1.89096958761338	1.4545628396345e-08	Intron (ENST00000422695.5/79083, intron 4 of 5)	9060	ENSG00000115648	MLPH	melanophilin
chr2	237509979	237510538	*	+ 2 fold & sig. in both	E2 vs DMSO	1.75963717245648	5.75308808408304e-08	Promoter	0	ENSG00000115648	MLPH	melanophilin
chr2	237540633	237541634	*	+ 2 fold & sig. in both	E2 vs DMSO	1.15163873435673	0.000189644797679993	Promoter	0	ENSG00000115648	MLPH	melanophilin
chr2	237940847	237941109	*	+ 2 fold & sig. in both	E2 vs DMSO	1.19377095050448	0.00838408864020438	Intron (ENST00000686788.1/105373960, intron 1 of 1)	21621	NA	LOC105373960	uncharacterized LOC105373960
chr2	240450175	240450663	*	+ 2 fold & sig. in both	E2 vs DMSO	1.53130364496447	3.97850843502495e-05	Exon (ENST00000471662.1/100130449, exon 1 of 2)	880	ENSG00000218416	LOC100130449	uncharacterized LOC100130449
chr2	25009917	25010343	*	+ 2 fold & sig. in both	E2 vs DMSO	1.13184361114385	0.0146429184574374	Exon (ENST00000671429.1/ENST00000671429.1, exon 1 of 2)	8638	ENSG00000224165	DNAJC27-AS1	DNAJC27 antisense RNA 1
chr2	25301466	25301864	*	+ 2 fold & sig. in both	E2 vs DMSO	1.277902876124	0.0211800572455897	Intron (ENST00000264709.7/1788, intron 2 of 22)	-25946	ENSG00000119772	DNMT3A	DNA methyltransferase 3 alpha
chr2	26080392	26080792	*	+ 2 fold & sig. in both	E2 vs DMSO	1.11060872280421	0.00984504438461364	Intron (ENST00000264710.5/10890, intron 1 of 5)	-17738	ENSG00000084733	RAB10	RAB10, member RAS oncogene family
chr2	28360913	28361468	*	+ 2 fold & sig. in both	E2 vs DMSO	1.32035259349314	1.32405718551066e-06	Distal Intergenic	-30980	ENSG00000075426	FOSL2	FOS like 2, AP-1 transcription factor subunit
chr2	33069815	33070600	*	+ 2 fold & sig. in both	E2 vs DMSO	1.53486018415724	4.99604123252615e-08	Intron (ENST00000404816.7/4052, intron 3 of 33)	-63806	ENSG00000049323	LTBP1	latent transforming growth factor beta binding protein 1
chr2	38514747	38515933	*	+ 2 fold & sig. in both	E2 vs DMSO	1.13716388908844	6.65785301440189e-06	Promoter	0	ENSG00000231367	LINC02613	long intergenic non-protein coding RNA 2613
chr2	42008236	42008522	*	+ 2 fold & sig. in both	E2 vs DMSO	1.8382585978286	3.99586923906373e-05	Distal Intergenic	-39499	ENSG00000162878	PKDCC	protein kinase domain containing, cytoplasmic
chr2	42010615	42011240	*	+ 2 fold & sig. in both	E2 vs DMSO	2.12831821795675	3.31732231478415e-07	Distal Intergenic	-36781	ENSG00000162878	PKDCC	protein kinase domain containing, cytoplasmic
chr2	43273469	43274116	*	+ 2 fold & sig. in both	E2 vs DMSO	1.80285241587351	2.99125140116108e-08	Intron (ENST00000407351.5/63892, intron 21 of 22)	3185	ENSG00000115970	THADA	THADA armadillo repeat containing
chr2	44103715	44104037	*	+ 2 fold & sig. in both	E2 vs DMSO	1.43790849285449	0.00120936408718785	Distal Intergenic	-63932	ENSG00000138032	PPM1B	protein phosphatase, Mg2+/Mn2+ dependent 1B
chr2	44958933	44959359	*	+ 2 fold & sig. in both	E2 vs DMSO	1.51672235808741	0.000490932356345344	Intron (ENST00000425325.2/ENST00000425325.2, intron 2 of 3)	-17017	ENSG00000236502	SIX3-AS1	SIX3 antisense RNA 1
chr2	45752359	45753406	*	+ 2 fold & sig. in both	E2 vs DMSO	2.20167253781117	1.36261120216801e-08	Intron (ENST00000421201.1/5581, intron 2 of 2)	54377	ENSG00000171132	PRKCE	protein kinase C epsilon
chr2	45753460	45753722	*	+ 2 fold & sig. in both	E2 vs DMSO	1.30891332590439	0.00239545026752958	Intron (ENST00000421201.1/5581, intron 2 of 2)	55478	ENSG00000171132	PRKCE	protein kinase C epsilon
chr2	46095872	46096191	*	+ 2 fold & sig. in both	E2 vs DMSO	1.53707981976615	4.01776026368145e-05	Intron (ENST00000306156.8/5581, intron 11 of 14)	22076	ENSG00000171132	PRKCE	protein kinase C epsilon
chr2	46970524	46971265	*	+ 2 fold & sig. in both	E2 vs DMSO	1.59765511031047	6.09939149905256e-08	Intron (ENST00000698500.1/57217, intron 6 of 21)	-6853	ENSG00000068724	TTC7A	tetratricopeptide repeat domain 7A
chr2	64273576	64274434	*	+ 2 fold & sig. in both	E2 vs DMSO	1.74153714687046	5.73825934354699e-08	Exon (ENST00000684810.1/ENST00000684810.1, exon 1 of 2)	23341	NA	LOC100507006	uncharacterized LOC100507006
chr2	65300106	65300612	*	+ 2 fold & sig. in both	E2 vs DMSO	1.75546728212365	1.0921943394789e-06	Distal Intergenic	34161	ENSG00000198369	SPRED2	sprouty related EVH1 domain containing 2
chr2	65604078	65604721	*	+ 2 fold & sig. in both	E2 vs DMSO	1.64588827123153	1.39592975337005e-05	Intron (ENST00000606978.5/105369168, intron 4 of 9)	-126954	NA	LOC105369167	uncharacterized LOC105369167
chr2	67849258	67849953	*	+ 2 fold & sig. in both	E2 vs DMSO	1.7420214390522	1.37446184868901e-07	Distal Intergenic	-23696	ENSG00000237013	LINC01812	long intergenic non-protein coding RNA 1812
chr2	69944767	69945188	*	+ 2 fold & sig. in both	E2 vs DMSO	1.77461023733247	2.03229159883908e-05	Distal Intergenic	16443	ENSG00000179818	ASPRV1	aspartic peptidase retroviral like 1
chr2	69976560	69976957	*	+ 2 fold & sig. in both	E2 vs DMSO	2.07111558761192	1.83605262554167e-07	Promoter	0	ENSG00000179818	PCBP1-AS1	PCBP1 antisense RNA 1
chr2	7017550	7018227	*	+ 2 fold & sig. in both	E2 vs DMSO	1.3747174980536	2.36922299545027e-06	Intron (ENST00000320892.11/9781, intron 5 of 8)	20610	ENSG00000151692	RNF144A	ring finger protein 144A
chr2	70381800	70382455	*	+ 2 fold & sig. in both	E2 vs DMSO	1.33229908673787	1.55050428861498e-06	Distal Intergenic	-79733	ENSG00000035141	FAM136A	family with sequence similarity 136 member A
chr2	70930565	70931050	*	+ 2 fold & sig. in both	E2 vs DMSO	1.63725899110115	1.03944204012065e-05	Intron (ENST00000234392.3/25806, intron 2 of 2)	-4850	ENSG00000116039	ATP6V1B1	ATPase H+ transporting V1 subunit B1
chr2	71120173	71120801	*	+ 2 fold & sig. in both	E2 vs DMSO	1.29527684652784	1.33069931024119e-06	Intron (ENST00000413592.5/84693, intron 1 of 1)	-1789	ENSG00000124370	MCEE	methylmalonyl-CoA epimerase
chr2	71458655	71459413	*	+ 2 fold & sig. in both	E2 vs DMSO	1.0025168813499	0.000356794445812751	Intron (ENST00000258104.8/8291, intron 1 of 54)	4933	ENSG00000135636	DYSF	dysferlin
chr2	72781584	72781898	*	+ 2 fold & sig. in both	E2 vs DMSO	1.01310963175819	0.0352577708436352	Intron (ENST00000272427.11/23233, intron 1 of 21)	21050	NA	NA	NA
chr2	73513169	73513823	*	+ 2 fold & sig. in both	E2 vs DMSO	1.52996921976522	9.02489670823494e-06	Intron (ENST00000484298.5/7840, intron 9 of 21)	-6133	ENSG00000116127	ALMS1	ALMS1 centrosome and basal body associated protein
chr2	73750674	73751050	*	+ 2 fold & sig. in both	E2 vs DMSO	1.40867156762949	0.00252700551417707	Exon (ENST00000608509.1/ENST00000608509.1, exon 1 of 1)	-13274	ENSG00000144034	TPRKB	TP53RK binding protein
chr2	84085498	84085951	*	+ 2 fold & sig. in both	E2 vs DMSO	1.37023311020042	0.00112632108315609	Distal Intergenic	-204826	NA	FUNDC2P2	FUN14 domain containing 2 pseudogene 2
chr2	96964675	96965127	*	+ 2 fold & sig. in both	E2 vs DMSO	1.34399108874119	2.83056119759088e-07	Intron (ENST00000490605.3/51252, intron 5 of 16)	-12740	ENSG00000168754	FAM178B	family with sequence similarity 178 member B
chr2	98233793	98234419	*	+ 2 fold & sig. in both	E2 vs DMSO	1.58758768075602	5.38705712418493e-06	Intron (ENST00000432242.5/200403, intron 16 of 28)	-2214	ENSG00000168658	VWA3B	von Willebrand factor A domain containing 3B
chr2	99617754	99618363	*	+ 2 fold & sig. in both	E2 vs DMSO	1.04992939603533	0.000328772709776488	Intron (ENST00000409236.6/3899, intron 11 of 22)	-23984	ENSG00000144218	AFF3	AF4/FMR2 family member 3
chr2	99636601	99637114	*	+ 2 fold & sig. in both	E2 vs DMSO	2.31958951119263	2.07102435388637e-08	Intron (ENST00000409236.6/3899, intron 11 of 22)	-42831	ENSG00000144218	AFF3	AF4/FMR2 family member 3
chr2	99938270	99938707	*	+ 2 fold & sig. in both	E2 vs DMSO	1.20362504664327	0.0113347390566814	Intron (ENST00000409236.6/3899, intron 5 of 22)	68068	ENSG00000144218	AFF3	AF4/FMR2 family member 3
chr20	10662340	10662861	*	+ 2 fold & sig. in both	E2 vs DMSO	1.3171267674923	2.41161059286826e-06	Promoter	0	ENSG00000101384	JAG1	jagged canonical Notch ligand 1
chr20	1334813	1335269	*	+ 2 fold & sig. in both	E2 vs DMSO	1.65353671861151	1.30726314797904e-06	Intron (ENST00000665859.2/100507495, intron 1 of 2)	-5674	ENSG00000125775	SDCBP2	syndecan binding protein 2
chr20	14950695	14950987	*	+ 2 fold & sig. in both	E2 vs DMSO	1.42614990488827	0.000857579598728655	Intron (ENST00000217246.8/140733, intron 5 of 16)	-21167	ENSG00000235914	MACROD2-AS1	MACROD2 antisense RNA 1
chr20	17645981	17646488	*	+ 2 fold & sig. in both	E2 vs DMSO	1.1742300438862	0.00159497524608396	Intron (ENST00000246043.8/6238, intron 1 of 22)	-2896	ENSG00000125844	RRBP1	ribosome binding protein 1
chr20	18224939	18225707	*	+ 2 fold & sig. in both	E2 vs DMSO	1.08595712887738	0.0383503893902417	Distal Intergenic	45362	ENSG00000287954	LOC105372551	uncharacterized LOC105372551
chr20	19283394	19284160	*	+ 2 fold & sig. in both	E2 vs DMSO	1.2159696541432	6.15592646136112e-08	Promoter	436	ENSG00000179447	SLC24A3-AS1	SLC24A3 antisense RNA 1
chr20	19370129	19370600	*	+ 2 fold & sig. in both	E2 vs DMSO	1.52071886282834	8.69532189745424e-05	Intron (ENST00000328041.11/57419, intron 2 of 16)	-85533	ENSG00000179447	SLC24A3-AS1	SLC24A3 antisense RNA 1
chr20	20441278	20441736	*	+ 2 fold & sig. in both	E2 vs DMSO	1.31722325043893	0.000194516589763143	Intron (ENST00000202677.12/57186, intron 37 of 39)	70864	ENSG00000188559	RALGAPA2	Ral GTPase activating protein catalytic subunit alpha 2
chr20	24131304	24131690	*	+ 2 fold & sig. in both	E2 vs DMSO	1.37031313969025	0.000366378695582234	Intron (ENST00000669143.1/400839, intron 2 of 4)	67980	ENSG00000230133	LINC01721	long intergenic non-protein coding RNA 1721
chr20	24582816	24583051	*	+ 2 fold & sig. in both	E2 vs DMSO	1.12105189487539	0.0250386678349433	Intron (ENST00000376862.4/79953, intron 2 of 3)	-1851	ENSG00000101463	SYNDIG1	synapse differentiation inducing 1
chr20	24649883	24650534	*	+ 2 fold & sig. in both	E2 vs DMSO	2.42062688234308	2.38333990083885e-09	Intron (ENST00000376862.4/79953, intron 3 of 3)	64981	ENSG00000101463	SYNDIG1	synapse differentiation inducing 1
chr20	3068970	3069425	*	+ 2 fold & sig. in both	E2 vs DMSO	1.43865825346356	8.31896811971638e-05	Distal Intergenic	-2195	ENSG00000101405	OXT	oxytocin/neurophysin I prepropeptide
chr20	32040615	32041204	*	+ 2 fold & sig. in both	E2 vs DMSO	1.07738722955653	7.84332400018224e-06	Distal Intergenic	-10993	ENSG00000101336	HCK	HCK proto-oncogene, Src family tyrosine kinase
chr20	36027085	36027815	*	+ 2 fold & sig. in both	E2 vs DMSO	1.67982180596599	3.55106926415016e-07	Intron (ENST00000373973.7/140894, intron 11 of 11)	23203	ENSG00000260032	NORAD	non-coding RNA activated by DNA damage
chr20	36062593	36063160	*	+ 2 fold & sig. in both	E2 vs DMSO	1.04171002458778	2.96758481431983e-05	Intron (ENST00000651340.1/ENST00000651340.1, intron 3 of 4)	-11575	ENSG00000260032	NORAD	non-coding RNA activated by DNA damage
chr20	36587274	36587681	*	+ 2 fold & sig. in both	E2 vs DMSO	1.5989320654897	4.29480634741924e-07	Intron (ENST00000373874.6/60436, intron 2 of 2)	8349	ENSG00000118707	TGIF2	TGFB induced factor homeobox 2
chr20	3665838	3666198	*	+ 2 fold & sig. in both	E2 vs DMSO	1.18548674040285	0.0146144128684323	Distal Intergenic	-2439	ENSG00000125861	GFRA4	GDNF family receptor alpha 4
chr20	43775940	43776339	*	+ 2 fold & sig. in both	E2 vs DMSO	1.47123886362148	0.000151324591884254	Distal Intergenic	-48938	ENSG00000124196	GTSF1L	gametocyte specific factor 1 like
chr20	44302197	44302666	*	+ 2 fold & sig. in both	E2 vs DMSO	1.53004880211702	0.000272535588124425	Distal Intergenic	8536	ENSG00000197296	FITM2	fat storage inducing transmembrane protein 2
chr20	44765203	44766446	*	+ 2 fold & sig. in both	E2 vs DMSO	1.03235941993062	1.24297648654916e-05	Intron (ENST00000372851.8/140730, intron 2 of 5)	-19182	NA	KCNK15-AS1	KCNK15 and WISP2 antisense RNA 1
chr20	47344860	47345649	*	+ 2 fold & sig. in both	E2 vs DMSO	1.05528642397097	0.0134699935310969	Intron (ENST00000311275.11/23613, intron 2 of 21)	2423	ENSG00000101040	ZMYND8	zinc finger MYND-type containing 8
chr20	47857091	47857642	*	+ 2 fold & sig. in both	E2 vs DMSO	1.15377247372826	0.000672108329065123	Distal Intergenic	-70475	ENSG00000196562	SULF2	sulfatase 2
chr20	47911919	47912611	*	+ 2 fold & sig. in both	E2 vs DMSO	1.09839129867082	0.00119145546120861	Distal Intergenic	-38186	NA	LOC105372637	uncharacterized LOC105372637
chr20	48157945	48158445	*	+ 2 fold & sig. in both	E2 vs DMSO	2.22068968118417	8.68568874993016e-10	Distal Intergenic	-33921	NA	LOC105372641	uncharacterized LOC105372641
chr20	48166315	48166819	*	+ 2 fold & sig. in both	E2 vs DMSO	1.15173236419713	0.0181288613444497	Distal Intergenic	-25547	NA	LOC105372641	uncharacterized LOC105372641
chr20	48224355	48225087	*	+ 2 fold & sig. in both	E2 vs DMSO	1.06978019892639	7.29695741469554e-06	Distal Intergenic	31989	NA	LOC105372641	uncharacterized LOC105372641
chr20	48572127	48572667	*	+ 2 fold & sig. in both	E2 vs DMSO	1.98470438812802	1.38362705371145e-09	Distal Intergenic	70071	ENSG00000124126	PREX1	phosphatidylinositol-3,4,5-trisphosphate dependent Rac exchange factor 1
chr20	48864232	48865238	*	+ 2 fold & sig. in both	E2 vs DMSO	1.88284086658801	3.39281278533894e-08	Distal Intergenic	-14774	ENSG00000124126	PREX1	phosphatidylinositol-3,4,5-trisphosphate dependent Rac exchange factor 1
chr20	50395178	50395562	*	+ 2 fold & sig. in both	E2 vs DMSO	1.01212423644649	0.00021624996555752	Distal Intergenic	-73692	ENSG00000233077	LINC01271	long intergenic non-protein coding RNA 1271
chr20	53522248	53522564	*	+ 2 fold & sig. in both	E2 vs DMSO	1.3115457715564	0.0088280658761788	Distal Intergenic	-17934	NA	LOC105372669	uncharacterized LOC105372669
chr20	53661590	53662315	*	+ 2 fold & sig. in both	E2 vs DMSO	1.12546972129324	1.2290231349457e-06	Distal Intergenic	-51683	ENSG00000171940	ZNF217	zinc finger protein 217
chr20	54126910	54127470	*	+ 2 fold & sig. in both	E2 vs DMSO	1.89251604461083	1.80136842902068e-10	Distal Intergenic	29828	ENSG00000019186	CYP24A1	cytochrome P450 family 24 subfamily A member 1
chr20	54194674	54196116	*	+ 2 fold & sig. in both	E2 vs DMSO	1.20974919622106	1.74867848647684e-09	Distal Intergenic	-11971	ENSG00000101132	PFDN4	prefoldin subunit 4
chr20	56936548	56937089	*	+ 2 fold & sig. in both	E2 vs DMSO	1.54608185778372	6.06649633621265e-06	Distal Intergenic	182454	NA	LOC105372685	uncharacterized LOC105372685
chr20	60062676	60063413	*	+ 2 fold & sig. in both	E2 vs DMSO	1.91487508002104	3.29550057830941e-09	Intron (ENST00000660831.1/284756, intron 1 of 2)	6751	ENSG00000176659	LINC02910	long intergenic non-protein coding RNA 2910
chr20	64238220	64238745	*	+ 2 fold & sig. in both	E2 vs DMSO	1.00363369650913	0.00545581808788576	Intron (ENST00000328439.6/4661, intron 21 of 22)	-16950	ENSG00000203880	PCMTD2	protein-L-isoaspartate (D-aspartate) O-methyltransferase domain containing 2
chr20	7691640	7692178	*	+ 2 fold & sig. in both	E2 vs DMSO	1.40826658963545	0.000101633300888075	Distal Intergenic	248280	ENSG00000101323	HAO1	hydroxyacid oxidase 1
chr20	9531434	9531962	*	+ 2 fold & sig. in both	E2 vs DMSO	1.28322706089924	4.61488023648491e-05	Distal Intergenic	-16436	ENSG00000225988	LAMP5-AS1	LAMP5 antisense RNA 1
chr21	15122300	15122795	*	+ 2 fold & sig. in both	E2 vs DMSO	1.21022937524546	0.00985611460414253	Exon (ENST00000674143.1/107985483, exon 2 of 5)	15854	NA	LOC107985483	uncharacterized LOC107985483
chr21	15132722	15133131	*	+ 2 fold & sig. in both	E2 vs DMSO	1.22023072629233	0.00722815155454646	Intron (ENST00000674143.1/107985483, intron 1 of 4)	5518	NA	LOC107985483	uncharacterized LOC107985483
chr21	15342370	15343071	*	+ 2 fold & sig. in both	E2 vs DMSO	1.55010639888731	0.000144524158739618	Distal Intergenic	47642	ENSG00000229425	LOC101927745	uncharacterized LOC101927745
chr21	15547364	15547832	*	+ 2 fold & sig. in both	E2 vs DMSO	1.27479381883763	0.00619536234815955	Intron (ENST00000634644.1/101927745, intron 2 of 11)	79282	ENSG00000229425	LOC105369302	uncharacterized LOC105369302
chr21	19566701	19567500	*	+ 2 fold & sig. in both	E2 vs DMSO	1.06882603039451	0.000278835341131064	Distal Intergenic	332255	ENSG00000233480	LINC01683	long intergenic non-protein coding RNA 1683
chr21	31529407	31529779	*	+ 2 fold & sig. in both	E2 vs DMSO	1.39717786145403	0.000124141894208503	Intron (ENST00000286827.7/7074, intron 1 of 28)	29198	ENSG00000156299	TIAM1	TIAM Rac1 associated GEF 1
chr21	34726678	34726961	*	+ 2 fold & sig. in both	E2 vs DMSO	1.0856086474942	0.00607686844239793	Intron (ENST00000430635.1/54064, intron 4 of 5)	10220	ENSG00000230978	LINC00160	long intergenic non-protein coding RNA 160
chr21	34728514	34729177	*	+ 2 fold & sig. in both	E2 vs DMSO	1.9456778542351	1.22136269377472e-07	Intron (ENST00000430635.1/54064, intron 4 of 5)	8004	ENSG00000230978	LINC00160	long intergenic non-protein coding RNA 160
chr21	35262188	35262624	*	+ 2 fold & sig. in both	E2 vs DMSO	1.05863205839682	0.00316844415530204	Intron (ENST00000475045.6/101928269, intron 9 of 12)	202705	ENSG00000159216	LOC100506403	uncharacterized LOC100506403
chr21	37768043	37768355	*	+ 2 fold & sig. in both	E2 vs DMSO	1.23524118133932	0.00724227722273505	Intron (ENST00000609713.2/3763, intron 2 of 3)	148102	ENSG00000157542	KCNJ6	potassium inwardly rectifying channel subfamily J member 6
chr21	42376120	42377024	*	+ 2 fold & sig. in both	E2 vs DMSO	1.16999797243238	4.29480634741924e-07	Exon (ENST00000433957.7/64699, exon 11 of 13)	5729	ENSG00000160183	TMPRSS3	transmembrane serine protease 3
chr21	42664200	42664456	*	+ 2 fold & sig. in both	E2 vs DMSO	1.23268610642142	0.015362346103907	Intron (ENST00000291539.11/5152, intron 1 of 19)	10387	ENSG00000160191	PDE9A	phosphodiesterase 9A
chr21	45327082	45327649	*	+ 2 fold & sig. in both	E2 vs DMSO	1.69055783549576	3.21819333791692e-07	Distal Intergenic	14341	ENSG00000237664	LINC00316	long intergenic non-protein coding RNA 316
chr21	45352997	45353519	*	+ 2 fold & sig. in both	E2 vs DMSO	1.29500524207062	7.47875783801104e-05	Exon (ENST00000689879.2/105372839, exon 2 of 2)	5450	NA	LOC105372839	uncharacterized LOC105372839
chr21	45378235	45379091	*	+ 2 fold & sig. in both	E2 vs DMSO	1.56632653503861	4.58300253281485e-05	Exon (ENST00000456613.1/ENST00000456613.1, exon 2 of 2)	-26074	ENSG00000182871	COL18A1	collagen type XVIII alpha 1 chain
chr21	45386321	45387378	*	+ 2 fold & sig. in both	E2 vs DMSO	1.88697951101905	1.5725061905176e-09	Distal Intergenic	-17787	ENSG00000182871	COL18A1	collagen type XVIII alpha 1 chain
chr22	18119695	18120128	*	+ 2 fold & sig. in both	E2 vs DMSO	1.3203028534931	0.00353880076535005	Promoter	-979	ENSG00000183785	TUBA8	tubulin alpha 8
chr22	19708933	19709521	*	+ 2 fold & sig. in both	E2 vs DMSO	1.90300064414928	1.82271764906022e-05	Distal Intergenic	-4982	ENSG00000184702	SEPTIN5	septin 5
chr22	20010280	20011064	*	+ 2 fold & sig. in both	E2 vs DMSO	1.71718061522111	3.95136041252755e-08	5' UTR	5681	ENSG00000099889	ARVCF	ARVCF delta catenin family member
chr22	20807413	20807745	*	+ 2 fold & sig. in both	E2 vs DMSO	1.05437368214865	0.00856870864776534	Exon (ENST00000255882.11/5297, exon 10 of 55)	-5395	ENSG00000241973	PI4KA	phosphatidylinositol 4-kinase alpha
chr22	20887390	20887806	*	+ 2 fold & sig. in both	E2 vs DMSO	1.421297709592	3.29688201208586e-06	Exon (ENST00000215730.12/9342, exon 5 of 5)	27907	ENSG00000099940	SNAP29	synaptosome associated protein 29
chr22	22076387	22076655	*	+ 2 fold & sig. in both	E2 vs DMSO	1.19322957076993	0.0198451670899204	Distal Intergenic	-32453	ENSG00000197549	PRAMENP	PRAME N-terminal like, pseudogene
chr22	24051568	24051936	*	+ 2 fold & sig. in both	E2 vs DMSO	1.17006467681906	0.00229743687779493	Intron (ENST00000454754.5/23523, intron 7 of 8)	-3132	ENSG00000099991	CABIN1	calcineurin binding protein 1
chr22	24526091	24526573	*	+ 2 fold & sig. in both	E2 vs DMSO	1.18306324380885	5.86455781065661e-05	3' UTR	5917	ENSG00000100024	UPB1	beta-ureidopropionase 1
chr22	25942945	25943468	*	+ 2 fold & sig. in both	E2 vs DMSO	1.18625903960469	0.000157119616071813	Intron (ENST00000536101.5/84700, intron 34 of 42)	-10067	ENSG00000133454	MYO18B	myosin XVIIIB
chr22	26684591	26685013	*	+ 2 fold & sig. in both	E2 vs DMSO	2.62090784179764	1.6122885239543e-08	Intron (ENST00000651474.1/102724827, intron 1 of 3)	6929	NA	MIATNB	MIAT neighbor
chr22	27345267	27346138	*	+ 2 fold & sig. in both	E2 vs DMSO	1.18592926077385	4.5134148638004e-05	Intron (ENST00000668323.1/102724900, intron 4 of 4)	13480	NA	LOC102724900	uncharacterized LOC102724900
chr22	28819242	28820042	*	+ 2 fold & sig. in both	E2 vs DMSO	1.20009641845276	2.244329869699e-07	Intron (ENST00000692644.1/ENST00000692644.1, intron 1 of 1)	18554	NA	LOC107985549	uncharacterized LOC107985549
chr22	29517147	29517981	*	+ 2 fold & sig. in both	E2 vs DMSO	1.39211187064482	2.05373009236939e-07	3' UTR	-5705	ENSG00000100296	THOC5	THO complex 5
chr22	30054552	30055088	*	+ 2 fold & sig. in both	E2 vs DMSO	1.35246888158999	0.00010616321110741	Intron (ENST00000429350.5/101929664, intron 1 of 4)	25142	ENSG00000227117	HORMAD2-AS1	HORMAD2 and MTMR3 antisense RNA 1
chr22	37021017	37021582	*	+ 2 fold & sig. in both	E2 vs DMSO	1.81252885315319	3.22495381993933e-07	Promoter	-834	ENSG00000128311	TST	thiosulfate sulfurtransferase
chr22	37031820	37032412	*	+ 2 fold & sig. in both	E2 vs DMSO	1.05223074979272	7.91619937977586e-05	Promoter	-712	NA	LOC112268295	uncharacterized LOC112268295
chr22	37178342	37179120	*	+ 2 fold & sig. in both	E2 vs DMSO	1.17015224055776	3.22929085114509e-05	Intron (ENST00000419128.1/ENST00000419128.1, intron 1 of 1)	-3224	ENSG00000100385	IL2RB	interleukin 2 receptor subunit beta
chr22	37188924	37189555	*	+ 2 fold & sig. in both	E2 vs DMSO	1.25262221006567	9.98025718594555e-06	Promoter	-638	ENSG00000133466	C1QTNF6	C1q and TNF related 6
chr22	37570098	37570511	*	+ 2 fold & sig. in both	E2 vs DMSO	1.30275109994983	0.00011246181205814	3' UTR	5692	ENSG00000128283	CDC42EP1	CDC42 effector protein 1
chr22	37999403	38000237	*	+ 2 fold & sig. in both	E2 vs DMSO	1.32286160590668	3.25848350102074e-05	Intron (ENST00000407936.5/5435, intron 5 of 5)	10609	ENSG00000284266	MIR4534	microRNA 4534
chr22	38222793	38223163	*	+ 2 fold & sig. in both	E2 vs DMSO	1.30469977761962	0.000232497221770947	Promoter	0	ENSG00000198792	TMEM184B	transmembrane protein 184B
chr22	39482700	39483290	*	+ 2 fold & sig. in both	E2 vs DMSO	2.15079994823645	1.48871337970687e-07	Intron (ENST00000341184.7/4248, intron 1 of 1)	5187	ENSG00000128268	MGAT3	beta-1,4-mannosyl-glycoprotein 4-beta-N-acetylglucosaminyltransferase
chr22	42727343	42727807	*	+ 2 fold & sig. in both	E2 vs DMSO	1.66109616170257	2.21900514450825e-05	Distal Intergenic	-6045	ENSG00000128274	A4GALT	alpha 1,4-galactosyltransferase (P blood group)
chr22	43391091	43391766	*	+ 2 fold & sig. in both	E2 vs DMSO	2.02942677801189	1.47566008275286e-06	Distal Intergenic	-8565	ENSG00000236117	LINC01639	long intergenic non-protein coding RNA 1639
chr22	44455247	44456073	*	+ 2 fold & sig. in both	E2 vs DMSO	1.18260621914245	5.81830114831689e-05	Distal Intergenic	11920	ENSG00000232655	LINC01656	long intergenic non-protein coding RNA 1656
chr22	44532488	44533086	*	+ 2 fold & sig. in both	E2 vs DMSO	1.24614520251296	0.000313613961042528	Distal Intergenic	-34255	ENSG00000188636	RTL6	retrotransposon Gag like 6
chr22	46399428	46399958	*	+ 2 fold & sig. in both	E2 vs DMSO	1.25338500372399	0.00552977156767162	Promoter	-819	ENSG00000075275	CELSR1	cadherin EGF LAG seven-pass G-type receptor 1
chr22	46484944	46485194	*	+ 2 fold & sig. in both	E2 vs DMSO	1.07474264394833	0.0231185987292528	Intron (ENST00000262738.9/9620, intron 1 of 34)	49006	ENSG00000075275	CELSR1	cadherin EGF LAG seven-pass G-type receptor 1
chr22	46491831	46492434	*	+ 2 fold & sig. in both	E2 vs DMSO	1.79619159284494	2.79571909584806e-07	Intron (ENST00000262738.9/9620, intron 1 of 34)	41766	ENSG00000075275	CELSR1	cadherin EGF LAG seven-pass G-type receptor 1
chr22	49855512	49856087	*	+ 2 fold & sig. in both	E2 vs DMSO	1.10350495015102	0.00186880984994434	Intron (ENST00000216268.6/9889, intron 1 of 1)	1668	ENSG00000100426	ZBED4	zinc finger BED-type containing 4
chr3	100103882	100104641	*	+ 2 fold & sig. in both	E2 vs DMSO	1.70732408126233	2.77578522729551e-07	Intron (ENST00000463526.1/84319, intron 2 of 3)	9623	ENSG00000168386	FILIP1L	filamin A interacting protein 1 like
chr3	107986457	107986901	*	+ 2 fold & sig. in both	E2 vs DMSO	1.62216665948958	2.56824369092015e-06	Distal Intergenic	53015	NA	NA	NA
chr3	113830698	113830937	*	+ 2 fold & sig. in both	E2 vs DMSO	1.09103778161428	0.0406291902277528	Intron (ENST00000479212.5/54762, intron 1 of 18)	2516	ENSG00000178075	GRAMD1C	GRAM domain containing 1C
chr3	123637155	123637543	*	+ 2 fold & sig. in both	E2 vs DMSO	1.2434469208475	3.22776694340894e-05	Intron (ENST00000485162.5/100506826, intron 3 of 3)	1387	ENSG00000065534	MYLK	myosin light chain kinase
chr3	12647381	12647597	*	+ 2 fold & sig. in both	E2 vs DMSO	1.24110137652464	0.0352273514928406	Intron (ENST00000688543.1/5894, intron 1 of 15)	15056	ENSG00000132155	RAF1	Raf-1 proto-oncogene, serine/threonine kinase
chr3	127536117	127537154	*	+ 2 fold & sig. in both	E2 vs DMSO	1.13753160500439	2.66827132674505e-06	Promoter	0	ENSG00000239921	LINC01471	long intergenic non-protein coding RNA 1471
chr3	128084291	128084973	*	+ 2 fold & sig. in both	E2 vs DMSO	1.00770164250764	8.85384335664639e-05	Exon (ENST00000582176.1/ENST00000582176.1, exon 1 of 1)	2822	ENSG00000175792	RUVBL1	RuvB like AAA ATPase 1
chr3	128553984	128554581	*	+ 2 fold & sig. in both	E2 vs DMSO	1.2093335897357	2.90281947819214e-05	Distal Intergenic	21505	ENSG00000198685	LINC01565	long intergenic non-protein coding RNA 1565
chr3	129878366	129879044	*	+ 2 fold & sig. in both	E2 vs DMSO	1.31466443365027	3.87282634923707e-06	Intron (ENST00000393238.8/23023, intron 2 of 6)	-11266	ENSG00000172765	TMCC1	transmembrane and coiled-coil domain family 1
chr3	129971207	129971905	*	+ 2 fold & sig. in both	E2 vs DMSO	1.25376770307231	6.54808478385554e-07	Distal Intergenic	-2783	ENSG00000170893	TRH	thyrotropin releasing hormone
chr3	133613621	133613925	*	+ 2 fold & sig. in both	E2 vs DMSO	1.53251374487418	0.00466561291072672	Intron (ENST00000260810.10/11073, intron 23 of 27)	3601	ENSG00000163781	TOPBP1	DNA topoisomerase II binding protein 1
chr3	134327475	134327975	*	+ 2 fold & sig. in both	E2 vs DMSO	2.2585898846574	4.76189748446919e-07	Exon (ENST00000702198.1/105374119, exon 2 of 2)	13899	ENSG00000240006	LINC02004	long intergenic non-protein coding RNA 2004
chr3	146093997	146094502	*	+ 2 fold & sig. in both	E2 vs DMSO	1.32719207824096	0.000710435732366788	Intron (ENST00000480247.1/ENST00000480247.1, intron 3 of 3)	-1561	ENSG00000152952	PLOD2	procollagen-lysine,2-oxoglutarate 5-dioxygenase 2
chr3	150503810	150504548	*	+ 2 fold & sig. in both	E2 vs DMSO	1.35433469461179	0.0367182329161681	Distal Intergenic	41948	ENSG00000120742	SERP1	stress associated endoplasmic reticulum protein 1
chr3	150737220	150737757	*	+ 2 fold & sig. in both	E2 vs DMSO	1.4902926830321	9.07004262618275e-07	Exon (ENST00000659411.1/101928105, exon 2 of 4)	1174	NA	LOC101928105	uncharacterized LOC101928105
chr3	150756473	150756894	*	+ 2 fold & sig. in both	E2 vs DMSO	1.02865703208246	0.000249122645518345	Intron (ENST00000312960.4/6478, intron 1 of 1)	-5259	NA	LOC105374155	uncharacterized LOC105374155
chr3	150844460	150845084	*	+ 2 fold & sig. in both	E2 vs DMSO	1.83009926412996	4.18165647525117e-06	Intron (ENST00000663257.1/105374155, intron 2 of 2)	-7400	NA	CLRN1-AS1	CLRN1 antisense RNA 1
chr3	154218707	154219124	*	+ 2 fold & sig. in both	E2 vs DMSO	2.64606188860715	1.65393068432182e-07	Intron (ENST00000356448.8/26084, intron 10 of 14)	-6661	ENSG00000114790	ARHGEF26	Rho guanine nucleotide exchange factor 26
chr3	15477514	15477846	*	+ 2 fold & sig. in both	E2 vs DMSO	1.11767241394717	0.0106539795721688	Promoter	0	ENSG00000206561	COLQ	collagen like tail subunit of asymmetric acetylcholinesterase
chr3	156513554	156514018	*	+ 2 fold & sig. in both	E2 vs DMSO	1.03830273057328	0.000206357407646272	Intron (ENST00000472028.5/7881, intron 8 of 8)	34979	ENSG00000114850	SSR3	signal sequence receptor subunit 3
chr3	156637588	156638168	*	+ 2 fold & sig. in both	E2 vs DMSO	1.21793421491018	6.27576631804362e-06	Distal Intergenic	-35067	ENSG00000163659	TIPARP	TCDD inducible poly(ADP-ribose) polymerase
chr3	161067023	161067320	*	+ 2 fold & sig. in both	E2 vs DMSO	1.03494873772509	0.00458415808685518	Intron (ENST00000498165.6/151742, intron 3 of 3)	24859	ENSG00000169255	B3GALNT1	beta-1,3-N-acetylgalactosaminyltransferase 1 (globoside blood group)
chr3	161100865	161101298	*	+ 2 fold & sig. in both	E2 vs DMSO	1.14354868549638	3.86868922004041e-05	Promoter	436	ENSG00000169255	B3GALNT1	beta-1,3-N-acetylgalactosaminyltransferase 1 (globoside blood group)
chr3	16417210	16417886	*	+ 2 fold & sig. in both	E2 vs DMSO	1.67242637876156	2.36896662693416e-06	Intron (ENST00000432519.5/23180, intron 2 of 8)	16884	ENSG00000131378	RFTN1	raftlin, lipid raft linker 1
chr3	164862067	164862675	*	+ 2 fold & sig. in both	E2 vs DMSO	1.01687105269096	0.00906372353574557	Distal Intergenic	-30587	ENSG00000241767	LINC01324	long intergenic non-protein coding RNA 1324
chr3	167728235	167728491	*	+ 2 fold & sig. in both	E2 vs DMSO	1.07198370897422	0.0189473148515282	Intron (ENST00000392750.7/11235, intron 2 of 8)	2485	ENSG00000114209	PDCD10	programmed cell death 10
chr3	168870682	168871248	*	+ 2 fold & sig. in both	E2 vs DMSO	1.37183571093614	2.92857451522619e-05	Distal Intergenic	-30946	ENSG00000242268	LINC02082	long intergenic non-protein coding RNA 2082
chr3	168957324	168957816	*	+ 2 fold & sig. in both	E2 vs DMSO	1.37103827439265	0.00058116228415132	Distal Intergenic	-45206	NA	LINC01997	long intergenic non-protein coding RNA 1997
chr3	169105044	169105382	*	+ 2 fold & sig. in both	E2 vs DMSO	1.01182406348027	0.0330558737704501	Intron (ENST00000264674.7/2122, intron 10 of 16)	17290	ENSG00000085276	MECOM	MDS1 and EVI1 complex locus
chr3	169612938	169613274	*	+ 2 fold & sig. in both	E2 vs DMSO	1.10794059694224	0.0321160807319776	Intron (ENST00000651503.2/2122, intron 1 of 16)	50344	ENSG00000085276	MECOM	MDS1 and EVI1 complex locus
chr3	169613410	169613845	*	+ 2 fold & sig. in both	E2 vs DMSO	1.40886604825435	0.000255623435699098	Exon (ENST00000469794.1/ENST00000469794.1, exon 3 of 3)	49773	ENSG00000085276	MECOM	MDS1 and EVI1 complex locus
chr3	169948682	169949377	*	+ 2 fold & sig. in both	E2 vs DMSO	1.11451715079482	0.00116370477936381	Exon (ENST00000483289.2/100128164, exon 2 of 2)	16737	ENSG00000239219	LOC100128164	four and a half LIM domains 1 pseudogene
chr3	170334845	170335245	*	+ 2 fold & sig. in both	E2 vs DMSO	1.11976403247895	0.00335517465471178	Distal Intergenic	-22097	ENSG00000136603	SKIL	SKI like proto-oncogene
chr3	176953592	176954282	*	+ 2 fold & sig. in both	E2 vs DMSO	1.62922455092852	9.5753205188364e-08	Distal Intergenic	72133	ENSG00000177565	TBL1XR1	TBL1X receptor 1
chr3	177596317	177596611	*	+ 2 fold & sig. in both	E2 vs DMSO	1.06536569792735	0.0375960861004269	Intron (ENST00000442937.6/100505566, intron 2 of 3)	-20979	ENSG00000228221	LINC00578	long intergenic non-protein coding RNA 578
chr3	182702309	182702537	*	+ 2 fold & sig. in both	E2 vs DMSO	1.03895640359015	0.0162235210274792	Distal Intergenic	58095	NA	LINC02031	long intergenic non-protein coding RNA 2031
chr3	183826568	183827064	*	+ 2 fold & sig. in both	E2 vs DMSO	1.17705154933585	0.000297134430262791	Promoter	-974	ENSG00000180834	MAP6D1	MAP6 domain containing 1
chr3	185205842	185206259	*	+ 2 fold & sig. in both	E2 vs DMSO	1.79708326657722	4.97481325703348e-07	Intron (ENST00000231887.8/1962, intron 5 of 6)	29203	ENSG00000113790	EHHADH	enoyl-CoA hydratase and 3-hydroxyacyl CoA dehydrogenase
chr3	185211148	185212107	*	+ 2 fold & sig. in both	E2 vs DMSO	1.42345733319258	2.78684502340542e-06	Intron (ENST00000231887.8/1962, intron 5 of 6)	23355	ENSG00000113790	EHHADH	enoyl-CoA hydratase and 3-hydroxyacyl CoA dehydrogenase
chr3	188283356	188283683	*	+ 2 fold & sig. in both	E2 vs DMSO	1.24273606568243	0.0296932793208457	Intron (ENST00000448637.5/4026, intron 1 of 6)	43492	ENSG00000145012	LPP	LIM domain containing preferred translocation partner in lipoma
chr3	188491208	188492056	*	+ 2 fold & sig. in both	E2 vs DMSO	2.48601380765144	4.64794853512539e-09	Intron (ENST00000448637.5/4026, intron 4 of 6)	6618	ENSG00000145012	LPP	LIM domain containing preferred translocation partner in lipoma
chr3	193879106	193879929	*	+ 2 fold & sig. in both	E2 vs DMSO	1.54246984660498	3.2167933128092e-07	Distal Intergenic	-35082	NA	LINC02038	long intergenic non-protein coding RNA 2038
chr3	194270494	194270982	*	+ 2 fold & sig. in both	E2 vs DMSO	1.08035603398381	0.000862524343865175	Distal Intergenic	-5700	ENSG00000228271	LINC02048	long intergenic non-protein coding RNA 2048
chr3	195094162	195094584	*	+ 2 fold & sig. in both	E2 vs DMSO	1.27922417687489	0.000936145307334561	Promoter	0	ENSG00000173950	XXYLT1	xyloside xylosyltransferase 1
chr3	195185526	195186021	*	+ 2 fold & sig. in both	E2 vs DMSO	1.04940533887948	4.36327107636986e-05	Promoter	-728	ENSG00000173950	XXYLT1	xyloside xylosyltransferase 1
chr3	197353042	197353452	*	+ 2 fold & sig. in both	E2 vs DMSO	1.35214112855183	0.000103436302183951	Distal Intergenic	19098	NA	LOC101926923	uncharacterized LOC101926923
chr3	24268902	24269295	*	+ 2 fold & sig. in both	E2 vs DMSO	1.20800519091013	0.00152417877450153	Intron (ENST00000702841.1/101927854, intron 4 of 4)	79607	ENSG00000151090	THRB	thyroid hormone receptor beta
chr3	27324737	27325165	*	+ 2 fold & sig. in both	E2 vs DMSO	1.06242635104961	0.0453951627183254	Intron (ENST00000691995.1/152110, intron 5 of 35)	-33180	ENSG00000163491	NEK10	NIMA related kinase 10
chr3	42996637	42997140	*	+ 2 fold & sig. in both	E2 vs DMSO	1.15856015326286	5.99249917688121e-05	Intron (ENST00000451200.6/100506243, intron 5 of 5)	-4503	ENSG00000144649	GASK1A	golgi associated kinase 1A
chr3	43214579	43215221	*	+ 2 fold & sig. in both	E2 vs DMSO	1.24897868355655	3.65279461170284e-06	Distal Intergenic	-71291	ENSG00000163788	SNRK	SNF related kinase
chr3	4595588	4596116	*	+ 2 fold & sig. in both	E2 vs DMSO	1.08784933484572	0.0142677061549521	Promoter	-24	ENSG00000150995	ITPR1	inositol 1,4,5-trisphosphate receptor type 1
chr3	47487229	47487462	*	+ 2 fold & sig. in both	E2 vs DMSO	1.02672031639765	0.0338683295768021	Distal Intergenic	-10103	ENSG00000114650	SCAP	SREBF chaperone
chr3	48064445	48064887	*	+ 2 fold & sig. in both	E2 vs DMSO	1.64689296090415	1.82882360271718e-05	Intron (ENST00000395734.8/4134, intron 1 of 17)	23914	ENSG00000047849	MAP4	microtubule associated protein 4
chr3	50248469	50248766	*	+ 2 fold & sig. in both	E2 vs DMSO	1.55625597503598	0.000308286578847149	Intron (ENST00000422163.5/2771, intron 1 of 8)	1575	ENSG00000114353	GNAI2	G protein subunit alpha i2
chr3	50278587	50279902	*	+ 2 fold & sig. in both	E2 vs DMSO	1.82883742215101	2.79571909584806e-07	Promoter	0	ENSG00000179564	LSMEM2	leucine rich single-pass membrane protein 2
chr3	50284169	50284483	*	+ 2 fold & sig. in both	E2 vs DMSO	1.27021611981343	4.11284964361851e-05	Intron (ENST00000316436.4/132228, intron 1 of 3)	4156	ENSG00000214706	IFRD2	interferon related developmental regulator 2
chr3	50423334	50423865	*	+ 2 fold & sig. in both	E2 vs DMSO	1.05945987492277	0.000595389218850729	Intron (ENST00000424201.7/9254, intron 3 of 37)	55869	ENSG00000114395	CYB561D2	cytochrome b561 family member D2
chr3	50605018	50605506	*	+ 2 fold & sig. in both	E2 vs DMSO	1.19511411335406	9.85502626180013e-06	Distal Intergenic	-6014	ENSG00000114738	MAPKAPK3	MAPK activated protein kinase 3
chr3	53551177	53551927	*	+ 2 fold & sig. in both	E2 vs DMSO	2.43401950860128	1.89119459034174e-08	Intron (ENST00000637424.1/776, intron 3 of 46)	55983	ENSG00000157388	CACNA1D	calcium voltage-gated channel subunit alpha1 D
chr3	53707916	53708592	*	+ 2 fold & sig. in both	E2 vs DMSO	1.07223727525573	7.62840603586931e-05	Intron (ENST00000637424.1/776, intron 9 of 46)	5139	ENSG00000157388	CACNA1D	calcium voltage-gated channel subunit alpha1 D
chr3	57029514	57030330	*	+ 2 fold & sig. in both	E2 vs DMSO	1.69668061455446	6.75648232010946e-05	Intron (ENST00000338458.8/50650, intron 2 of 12)	-30334	ENSG00000186451	SPATA12	spermatogenesis associated 12
chr3	58388533	58389062	*	+ 2 fold & sig. in both	E2 vs DMSO	1.91190876865144	1.84392214225954e-06	Intron (ENST00000302779.9/54899, intron 4 of 16)	-6612	ENSG00000168297	PXK	PX domain containing serine/threonine kinase like
chr3	61807764	61808205	*	+ 2 fold & sig. in both	E2 vs DMSO	1.13665527230887	1.61991757999079e-05	Intron (ENST00000474889.6/5793, intron 2 of 29)	245853	ENSG00000144724	PTPRG	protein tyrosine phosphatase receptor type G
chr3	63156036	63156678	*	+ 2 fold & sig. in both	E2 vs DMSO	1.06697989475272	0.0397856003250917	Distal Intergenic	50061	ENSG00000244342	LINC00698	long intergenic non-protein coding RNA 698
chr3	64039863	64040374	*	+ 2 fold & sig. in both	E2 vs DMSO	1.07776279893721	0.0265524496754897	Distal Intergenic	-15853	ENSG00000163636	PSMD6	proteasome 26S subunit, non-ATPase 6
chr3	65922130	65922526	*	+ 2 fold & sig. in both	E2 vs DMSO	1.12265949118782	0.0159360974061119	Intron (ENST00000472514.1/100873983, intron 2 of 2)	-14455	ENSG00000151276	MAGI1	membrane associated guanylate kinase, WW and PDZ domain containing 1
chr3	65925323	65925876	*	+ 2 fold & sig. in both	E2 vs DMSO	1.51948448452141	2.42287311462486e-05	Intron (ENST00000330909.12/9223, intron 1 of 24)	-17648	ENSG00000151276	MAGI1	membrane associated guanylate kinase, WW and PDZ domain containing 1
chr3	69869031	69869394	*	+ 2 fold & sig. in both	E2 vs DMSO	1.19115916331997	0.00973607836873049	Intron (ENST00000687384.1/4286, intron 2 of 10)	2764	ENSG00000187098	MITF	melanocyte inducing transcription factor
chr3	71089352	71089728	*	+ 2 fold & sig. in both	E2 vs DMSO	1.04689489150903	0.00223232305728446	Intron (ENST00000318789.11/27086, intron 7 of 20)	5659	ENSG00000114861	FOXP1	forkhead box P1
chr3	71110543	71111311	*	+ 2 fold & sig. in both	E2 vs DMSO	2.17393580120753	1.38335267048007e-08	Intron (ENST00000318789.11/27086, intron 7 of 20)	1326	ENSG00000114861	FOXP1	forkhead box P1
chr3	71384374	71385026	*	+ 2 fold & sig. in both	E2 vs DMSO	1.30274111529911	2.21900514450825e-05	Intron (ENST00000318789.11/27086, intron 3 of 20)	-23605	ENSG00000114861	FOXP1	forkhead box P1
chr3	72172013	72172462	*	+ 2 fold & sig. in both	E2 vs DMSO	1.07865059755147	0.0196200486302155	Exon (ENST00000473713.6/201617, exon 3 of 3)	19065	ENSG00000243083	LINC00870	long intergenic non-protein coding RNA 870
chr3	73451246	73451696	*	+ 2 fold & sig. in both	E2 vs DMSO	1.05121190014263	0.00640713295374328	Intron (ENST00000263666.9/23024, intron 3 of 9)	-17342	ENSG00000121440	PDZRN3	PDZ domain containing ring finger 3
chr3	95916417	95916981	*	+ 2 fold & sig. in both	E2 vs DMSO	1.07286903447917	0.00221711347613653	Exon (ENST00000662488.1/ENST00000662488.1, exon 1 of 2)	-233224	ENSG00000244681	MTHFD2P1	methylenetetrahydrofolate dehydrogenase (NADP+ dependent) 2, methenyltetrahydrofolate cyclohydrolase pseudogene 1
chr3	97196953	97197493	*	+ 2 fold & sig. in both	E2 vs DMSO	1.0600848591192	0.0217577504423115	Intron (ENST00000470610.6/285220, intron 3 of 4)	-242117	ENSG00000080224	EPHA6	EPH receptor A6
chr4	10625080	10625650	*	+ 2 fold & sig. in both	E2 vs DMSO	1.17764312355103	2.25921547981009e-05	Intron (ENST00000226951.11/116449, intron 2 of 18)	30911	ENSG00000109684	CLNK	cytokine dependent hematopoietic cell linker
chr4	10656049	10656798	*	+ 2 fold & sig. in both	E2 vs DMSO	1.15241271775175	0.000102058910663593	Promoter	0	ENSG00000109684	CLNK	cytokine dependent hematopoietic cell linker
chr4	110106432	110106889	*	+ 2 fold & sig. in both	E2 vs DMSO	1.72966062533151	0.00536549481448159	Intron (ENST00000302274.8/79071, intron 1 of 3)	-46393	ENSG00000170522	ELOVL6	ELOVL fatty acid elongase 6
chr4	124977644	124977972	*	+ 2 fold & sig. in both	E2 vs DMSO	1.57577544448544	0.000306446716428228	Distal Intergenic	-264912	ENSG00000151458	ANKRD50	ankyrin repeat domain 50
chr4	132540335	132541206	*	+ 2 fold & sig. in both	E2 vs DMSO	1.80716958352906	5.8350719623442e-07	Distal Intergenic	-49858	ENSG00000251398	LINC01256	long intergenic non-protein coding RNA 1256
chr4	139676971	139677448	*	+ 2 fold & sig. in both	E2 vs DMSO	1.45073480991036	0.000152469333543273	Intron (ENST00000616265.4/4258, intron 1 of 5)	10943	ENSG00000085871	MGST2	microsomal glutathione S-transferase 2
chr4	145736216	145736759	*	+ 2 fold & sig. in both	E2 vs DMSO	1.16478058751119	0.000205573716222212	Intron (ENST00000508981.1/646603, intron 1 of 1)	3762	ENSG00000237136	C4orf51	chromosome 4 open reading frame 51
chr4	148007213	148007726	*	+ 2 fold & sig. in both	E2 vs DMSO	1.40965197067123	2.7170290958114e-07	Intron (ENST00000336498.8/79658, intron 18 of 22)	-15328	ENSG00000071205	ARHGAP10	Rho GTPase activating protein 10
chr4	157363382	157363876	*	+ 2 fold & sig. in both	E2 vs DMSO	1.78969243543137	3.39929878516575e-05	3' UTR	2682	ENSG00000120251	GRIA2	glutamate ionotropic receptor AMPA type subunit 2
chr4	162650843	162651070	*	+ 2 fold & sig. in both	E2 vs DMSO	1.37976727980689	0.00422838034150799	Distal Intergenic	442558	ENSG00000283468	MIR4454	microRNA 4454
chr4	162783035	162783670	*	+ 2 fold & sig. in both	E2 vs DMSO	1.70937021593113	4.15552109229571e-06	Intron (ENST00000661387.1/ENST00000661387.1, intron 2 of 3)	309958	ENSG00000283468	MIR4454	microRNA 4454
chr4	163385496	163386028	*	+ 2 fold & sig. in both	E2 vs DMSO	1.33163817631516	2.1026629962528e-05	Distal Intergenic	-40664	ENSG00000164128	NPY1R	neuropeptide Y receptor Y1
chr4	163448422	163449145	*	+ 2 fold & sig. in both	E2 vs DMSO	1.23862148416657	2.19471097859629e-05	Distal Intergenic	24609	ENSG00000151005	TKTL2	transketolase like 2
chr4	165454453	165454882	*	+ 2 fold & sig. in both	E2 vs DMSO	1.3387465496205	0.00122524221932537	Intron (ENST00000513982.5/1363, intron 1 of 3)	36227	ENSG00000109472	CPE	carboxypeptidase E
chr4	17701015	17701392	*	+ 2 fold & sig. in both	E2 vs DMSO	1.29295243774906	0.0151105427181513	Intron (ENST00000265018.4/27146, intron 5 of 17)	80229	ENSG00000047662	FAM184B	family with sequence similarity 184 member B
chr4	185513549	185514191	*	+ 2 fold & sig. in both	E2 vs DMSO	1.47985820666463	6.12247488955726e-06	3' UTR	3526	ENSG00000154553	PDLIM3	PDZ and LIM domain 3
chr4	185742835	185743073	*	+ 2 fold & sig. in both	E2 vs DMSO	1.01385066648038	0.0492977180062029	Intron (ENST00000284776.11/8470, intron 2 of 20)	-2505	ENSG00000154556	SORBS2	sorbin and SH3 domain containing 2
chr4	2936887	2937621	*	+ 2 fold & sig. in both	E2 vs DMSO	1.11065054463291	0.000193566162286023	Promoter	0	NA	NOP14-AS1	NOP14 antisense RNA 1
chr4	37480389	37481082	*	+ 2 fold & sig. in both	E2 vs DMSO	1.07288675595988	8.71940697880333e-05	Intron (ENST00000381980.9/55286, intron 1 of 3)	-3988	NA	NA	NA
chr4	38041355	38041790	*	+ 2 fold & sig. in both	E2 vs DMSO	1.16794295785916	0.0411171624015363	Intron (ENST00000261439.9/23216, intron 8 of 19)	-2684	ENSG00000065882	TBC1D1	TBC1 domain family member 1
chr4	38857698	38858275	*	+ 2 fold & sig. in both	E2 vs DMSO	1.02506280209527	0.00533030027998015	Promoter	-881	ENSG00000174125	TLR1	toll like receptor 1
chr4	40363304	40364271	*	+ 2 fold & sig. in both	E2 vs DMSO	1.07126607218346	1.15661607353025e-06	Distal Intergenic	13717	ENSG00000174343	CHRNA9	cholinergic receptor nicotinic alpha 9 subunit
chr4	48853069	48853570	*	+ 2 fold & sig. in both	E2 vs DMSO	1.58297450992444	0.000468590562132377	Intron (ENST00000509122.5/54940, intron 6 of 7)	877	ENSG00000109180	OCIAD1	OCIA domain containing 1
chr4	54593520	54594180	*	+ 2 fold & sig. in both	E2 vs DMSO	1.04432630463647	0.000348325335842322	Distal Intergenic	12951	ENSG00000250456	LINC02260	long intergenic non-protein coding RNA 2260
chr4	6415350	6415846	*	+ 2 fold & sig. in both	E2 vs DMSO	1.7675977577507	0.000164210760687696	Intron (ENST00000382599.9/5522, intron 1 of 8)	5272	ENSG00000074211	PPP2R2C	protein phosphatase 2 regulatory subunit Bgamma
chr4	67928595	67929021	*	+ 2 fold & sig. in both	E2 vs DMSO	1.70297782975165	3.36202164356999e-06	Intron (ENST00000500538.7/550112, intron 6 of 7)	17543	ENSG00000187054	TMPRSS11A	transmembrane serine protease 11A
chr4	68670441	68671151	*	+ 2 fold & sig. in both	E2 vs DMSO	1.8761465272695	6.09939149905256e-08	Promoter	0	ENSG00000196620	UGT2B15	UDP glucuronosyltransferase family 2 member B15
chr4	74580010	74580292	*	+ 2 fold & sig. in both	E2 vs DMSO	1.64355631289643	0.000435022307726634	Intron (ENST00000510419.1/107986229, intron 4 of 5)	9189	NA	LOC107986229	uncharacterized LOC107986229
chr4	76016375	76016760	*	+ 2 fold & sig. in both	E2 vs DMSO	1.00625633416921	0.0234509865686298	Intron (ENST00000513353.5/419, intron 1 of 3)	4278	ENSG00000156219	ART3	ADP-ribosyltransferase 3 (inactive)
chr4	763555	764312	*	+ 2 fold & sig. in both	E2 vs DMSO	1.03872151237871	6.05222083380655e-05	Intron (ENST00000470161.6/10336, intron 9 of 10)	762	ENSG00000249592	LOC100129917	uncharacterized LOC100129917
chr4	76611541	76612001	*	+ 2 fold & sig. in both	E2 vs DMSO	2.11659285009834	3.35714201762573e-06	Intron (ENST00000296043.7/57619, intron 2 of 10)	25286	ENSG00000138771	SHROOM3	shroom family member 3
chr4	80729095	80729709	*	+ 2 fold & sig. in both	E2 vs DMSO	1.52230502837093	5.7447133682279e-05	Intron (ENST00000358105.8/255119, intron 3 of 5)	-140340	ENSG00000197826	CFAP299	cilia and flagella associated protein 299
chr4	88084268	88084863	*	+ 2 fold & sig. in both	E2 vs DMSO	1.5713977371327	2.46061859505366e-05	Distal Intergenic	28202	ENSG00000118762	PKD2	polycystin 2, transient receptor potential cation channel
chr4	88242624	88242917	*	+ 2 fold & sig. in both	E2 vs DMSO	1.35844505863401	0.0247267066930476	Distal Intergenic	-10996	ENSG00000118777	ABCG2	ATP binding cassette subfamily G member 2 (Junior blood group)
chr4	90160099	90160451	*	+ 2 fold & sig. in both	E2 vs DMSO	1.17571429827417	0.00245834328804618	Intron (ENST00000509176.6/401145, intron 1 of 10)	32564	ENSG00000184305	CCSER1	coiled-coil serine rich protein 1
chr4	94690813	94691313	*	+ 2 fold & sig. in both	E2 vs DMSO	1.03447848729255	6.73605776230508e-05	Intron (ENST00000514304.1/ENST00000514304.1, intron 1 of 1)	66368	ENSG00000249599	BMPR1B-DT	BMPR1B divergent transcript
chr4	98688389	98689054	*	+ 2 fold & sig. in both	E2 vs DMSO	1.60621789122647	7.16108747394457e-07	Distal Intergenic	-29778	ENSG00000168785	TSPAN5	tetraspanin 5
chr5	10018052	10018524	*	+ 2 fold & sig. in both	E2 vs DMSO	1.20355691036435	0.00361167316389058	Distal Intergenic	-114200	ENSG00000169777	TAS2R1	taste 2 receptor member 1
chr5	100647436	100648175	*	+ 2 fold & sig. in both	E2 vs DMSO	1.53196859872042	2.96225407128808e-07	Distal Intergenic	85384	ENSG00000174132	FAM174A	family with sequence similarity 174 member A
chr5	107265176	107265774	*	+ 2 fold & sig. in both	E2 vs DMSO	1.39520457320268	2.3427790915901e-05	Distal Intergenic	122779	ENSG00000184349	EFNA5	ephrin A5
chr5	10954720	10955020	*	+ 2 fold & sig. in both	E2 vs DMSO	1.57494139536818	0.000844907778948974	Distal Intergenic	63040	ENSG00000169862	CTNND2	catenin delta 2
chr5	122852779	122853125	*	+ 2 fold & sig. in both	E2 vs DMSO	1.35619031081519	0.000816773138644555	Intron (ENST00000513613.5/28966, intron 1 of 4)	7116	ENSG00000064652	SNX24	sorting nexin 24
chr5	133249287	133249977	*	+ 2 fold & sig. in both	E2 vs DMSO	2.123151776547	1.5725061905176e-09	Exon (ENST00000265342.12/23105, exon 7 of 16)	2287	ENSG00000053108	FSTL4	follistatin like 4
chr5	139696367	139697061	*	+ 2 fold & sig. in both	E2 vs DMSO	1.15587845991893	0.000174051819839933	Intron (ENST00000515296.1/84249, intron 2 of 5)	11722	ENSG00000146005	PSD2	pleckstrin and Sec7 domain containing 2
chr5	139708547	139709526	*	+ 2 fold & sig. in both	E2 vs DMSO	1.10923202132508	5.70137615665477e-06	Intron (ENST00000515296.1/84249, intron 2 of 5)	23902	ENSG00000146005	PSD2	pleckstrin and Sec7 domain containing 2
chr5	143561074	143561607	*	+ 2 fold & sig. in both	E2 vs DMSO	1.10477280534234	0.00338924028023423	Exon (ENST00000661617.1/105378209, exon 2 of 5)	1855	NA	LOC105378209	uncharacterized LOC105378209
chr5	145945901	145946887	*	+ 2 fold & sig. in both	E2 vs DMSO	1.21262311122653	0.00204251788954624	Intron (ENST00000359120.9/153769, intron 2 of 9)	8024	ENSG00000156463	SH3RF2	SH3 domain containing ring finger 2
chr5	146027678	146028200	*	+ 2 fold & sig. in both	E2 vs DMSO	1.36702149064427	4.83497636496403e-07	Intron (ENST00000359120.9/153769, intron 5 of 9)	-14830	ENSG00000156463	SH3RF2	SH3 domain containing ring finger 2
chr5	14864028	14864813	*	+ 2 fold & sig. in both	E2 vs DMSO	1.24957730332952	7.95645830661977e-07	Intron (ENST00000284268.8/56172, intron 1 of 11)	6659	ENSG00000154122	ANKH	ANKH inorganic pyrophosphate transport regulator
chr5	149878000	149878748	*	+ 2 fold & sig. in both	E2 vs DMSO	1.34008854045673	3.35541756286101e-06	Intron (ENST00000255266.10/5145, intron 17 of 21)	-10108	ENSG00000132915	PDE6A	phosphodiesterase 6A
chr5	155068611	155069269	*	+ 2 fold & sig. in both	E2 vs DMSO	1.87018291404929	2.07102435388637e-08	Distal Intergenic	-18263	NA	LOC105378239	uncharacterized LOC105378239
chr5	16588487	16589146	*	+ 2 fold & sig. in both	E2 vs DMSO	1.00828592027399	0.000239995796721228	Intron (ENST00000306320.10/54463, intron 1 of 8)	-16397	ENSG00000154153	RETREG1	reticulophagy regulator 1
chr5	168316023	168316762	*	+ 2 fold & sig. in both	E2 vs DMSO	1.88430680283592	2.79471166555994e-08	Promoter	0	ENSG00000113645	WWC1	WW and C2 domain containing 1
chr5	173453005	173453657	*	+ 2 fold & sig. in both	E2 vs DMSO	1.86350219929998	7.27582927480864e-09	Distal Intergenic	-9827	NA	LOC105377732	uncharacterized LOC105377732
chr5	173454270	173454748	*	+ 2 fold & sig. in both	E2 vs DMSO	1.30581632769713	1.79791222588445e-06	Distal Intergenic	-8736	NA	LOC105377732	uncharacterized LOC105377732
chr5	173455138	173455702	*	+ 2 fold & sig. in both	E2 vs DMSO	1.05788283865012	1.1049412323881e-05	Distal Intergenic	-7782	NA	LOC105377732	uncharacterized LOC105377732
chr5	173472275	173473292	*	+ 2 fold & sig. in both	E2 vs DMSO	1.86548503909986	7.95176713472896e-08	Intron (ENST00000518605.1/105377732, intron 1 of 2)	2593	NA	LOC105377732	uncharacterized LOC105377732
chr5	173591024	173591524	*	+ 2 fold & sig. in both	E2 vs DMSO	1.41227553140611	0.000703363754142677	Distal Intergenic	11338	ENSG00000253955	LOC285593	uncharacterized LOC285593
chr5	173829698	173830125	*	+ 2 fold & sig. in both	E2 vs DMSO	1.5616451027848	6.74421979846914e-07	Distal Intergenic	-21907	ENSG00000254211	LINC01485	long intergenic non-protein coding RNA 1485
chr5	174483352	174483836	*	+ 2 fold & sig. in both	E2 vs DMSO	1.17402887202815	1.10194810206164e-05	Intron (ENST00000515513.5/101928176, intron 2 of 4)	-19847	ENSG00000249306	LINC01411	long intergenic non-protein coding RNA 1411
chr5	33549748	33550528	*	+ 2 fold & sig. in both	E2 vs DMSO	1.25113831918	9.04157487277307e-06	Intron (ENST00000504830.6/81792, intron 20 of 23)	73823	ENSG00000151388	ADAMTS12	ADAM metallopeptidase with thrombospondin type 1 motif 12
chr5	38830844	38831466	*	+ 2 fold & sig. in both	E2 vs DMSO	1.03384642765296	0.0177604750006992	Intron (ENST00000662290.1/101929768, intron 1 of 4)	14295	NA	OSMR-DT	OSMR divergent transcript
chr5	53476921	53477431	*	+ 2 fold & sig. in both	E2 vs DMSO	1.53948653323366	0.000173393808414718	Distal Intergenic	-3195	ENSG00000134363	FST	follistatin
chr5	56453975	56454802	*	+ 2 fold & sig. in both	E2 vs DMSO	1.25135509899943	1.39822712120924e-05	Exon (ENST00000665339.1/102467147, exon 4 of 4)	10294	ENSG00000248727	LINC01948	long intergenic non-protein coding RNA 1948
chr5	56668995	56669953	*	+ 2 fold & sig. in both	E2 vs DMSO	1.3864577161299	1.71956886380561e-06	Distal Intergenic	-62763	NA	C5orf67	chromosome 5 putative open reading frame 67
chr5	57501698	57502030	*	+ 2 fold & sig. in both	E2 vs DMSO	1.00724729149862	0.047329267410457	Intron (ENST00000506106.1/102724122, intron 3 of 3)	13079	NA	LOC102724122	uncharacterized LOC102724122
chr5	59293745	59294014	*	+ 2 fold & sig. in both	E2 vs DMSO	1.29441115227197	0.00715442061629856	Intron (ENST00000340635.11/5144, intron 1 of 14)	-17626	ENSG00000113448	PDE4D	phosphodiesterase 4D
chr5	66680823	66681156	*	+ 2 fold & sig. in both	E2 vs DMSO	1.10914654211152	0.00274014245903242	Intron (ENST00000406374.5/375449, intron 1 of 5)	-56875	ENSG00000069020	MAST4	microtubule associated serine/threonine kinase family member 4
chr5	67031631	67032058	*	+ 2 fold & sig. in both	E2 vs DMSO	1.01158739086409	0.000546378573962503	Intron (ENST00000403625.7/375449, intron 4 of 28)	26879	ENSG00000069020	MAST4	microtubule associated serine/threonine kinase family member 4
chr5	67234678	67235205	*	+ 2 fold & sig. in both	E2 vs DMSO	1.08317975772046	2.00221015718727e-05	Distal Intergenic	-37879	ENSG00000134061	CD180	CD180 molecule
chr5	67235472	67236258	*	+ 2 fold & sig. in both	E2 vs DMSO	1.03771645938794	5.98989887484234e-06	Distal Intergenic	-38673	ENSG00000134061	CD180	CD180 molecule
chr5	71631216	71631675	*	+ 2 fold & sig. in both	E2 vs DMSO	1.38640373041308	5.97870022190257e-06	Promoter	0	ENSG00000131844	MCCC2	methylcrotonyl-CoA carboxylase subunit 2
chr5	71680216	71680901	*	+ 2 fold & sig. in both	E2 vs DMSO	1.80659239284289	2.64682902187887e-07	Distal Intergenic	30867	ENSG00000131844	MCCC2	methylcrotonyl-CoA carboxylase subunit 2
chr5	71748301	71748906	*	+ 2 fold & sig. in both	E2 vs DMSO	1.63998876328793	3.02861540248259e-08	Distal Intergenic	28722	ENSG00000164326	CARTPT	CART prepropeptide
chr5	72835700	72836502	*	+ 2 fold & sig. in both	E2 vs DMSO	1.09470044458075	2.94542502892512e-05	Intron (ENST00000680533.1/3842, intron 1 of 23)	-11619	ENSG00000083312	TNPO1	transportin 1
chr5	73513713	73514345	*	+ 2 fold & sig. in both	E2 vs DMSO	1.06021095239935	0.000198257474051881	Distal Intergenic	11122	ENSG00000145741	BTF3	basic transcription factor 3
chr5	76303825	76304331	*	+ 2 fold & sig. in both	E2 vs DMSO	1.17012016862248	0.00160345304020844	Intron (ENST00000502798.7/22987, intron 12 of 12)	7131	NA	LOC105379042	uncharacterized LOC105379042
chr5	77775307	77775833	*	+ 2 fold & sig. in both	E2 vs DMSO	1.44420733904609	1.225332073207e-05	Promoter	428	ENSG00000171530	TBCA	tubulin folding cofactor A
chr5	77861485	77862313	*	+ 2 fold & sig. in both	E2 vs DMSO	2.18273471958272	1.37897676388808e-08	Intron (ENST00000522370.1/6902, intron 1 of 3)	6467	ENSG00000171530	TBCA	tubulin folding cofactor A
chr5	78182671	78183242	*	+ 2 fold & sig. in both	E2 vs DMSO	2.27070066273816	1.74010189249922e-08	Intron (ENST00000519295.6/8546, intron 7 of 26)	-73823	ENSG00000132842	AP3B1	adaptor related protein complex 3 subunit beta 1
chr5	78204135	78204837	*	+ 2 fold & sig. in both	E2 vs DMSO	1.59207851971159	4.02693584753732e-07	Intron (ENST00000519295.6/8546, intron 7 of 26)	89742	ENSG00000132842	AP3B1	adaptor related protein complex 3 subunit beta 1
chr5	80075312	80076236	*	+ 2 fold & sig. in both	E2 vs DMSO	1.57152966018983	1.07555612513622e-05	Exon (ENST00000515510.1/7060, exon 3 of 5)	2040	ENSG00000113296	THBS4	thrombospondin 4
chr5	81245281	81245845	*	+ 2 fold & sig. in both	E2 vs DMSO	1.00404104067868	0.00358133317635926	Exon (ENST00000501927.2/100131067, exon 2 of 3)	2932	ENSG00000247572	CKMT2-AS1	CKMT2 antisense RNA 1
chr5	9855074	9855584	*	+ 2 fold & sig. in both	E2 vs DMSO	1.17088733993422	0.000415657503520553	Intron (ENST00000654793.1/105374648, intron 1 of 4)	653	NA	LINC02221	long intergenic non-protein coding RNA 2221
chr6	105428175	105428881	*	+ 2 fold & sig. in both	E2 vs DMSO	1.12867375901304	4.84498910613018e-06	Intron (ENST00000650898.1/ENST00000650898.1, intron 1 of 1)	24893	NA	LOC105377921	uncharacterized LOC105377921
chr6	105553260	105553592	*	+ 2 fold & sig. in both	E2 vs DMSO	1.13030757484302	0.0110422268938928	Intron (ENST00000701429.1/ENST00000701429.1, intron 1 of 1)	78604	NA	LINC02836	long intergenic non-protein coding RNA 2836
chr6	105628435	105629079	*	+ 2 fold & sig. in both	E2 vs DMSO	1.65542490227455	1.96590038198591e-06	Intron (ENST00000423489.1/105377922, intron 2 of 5)	3117	NA	LINC02836	long intergenic non-protein coding RNA 2836
chr6	105795985	105796549	*	+ 2 fold & sig. in both	E2 vs DMSO	1.67378458721566	9.89715383664464e-07	Intron (ENST00000644129.1/105377923, intron 3 of 3)	96492	NA	LOC105377923	uncharacterized LOC105377923
chr6	106134783	106135699	*	+ 2 fold & sig. in both	E2 vs DMSO	1.51975909372103	7.94103596316659e-08	Intron (ENST00000636437.1/9474, intron 6 of 6)	35843	ENSG00000057657	PRDM1	PR/SET domain 1
chr6	108717114	108717473	*	+ 2 fold & sig. in both	E2 vs DMSO	1.87165805952743	2.37277245982064e-06	Distal Intergenic	-34181	ENSG00000203801	LINC00222	long intergenic non-protein coding RNA 222
chr6	110554761	110555412	*	+ 2 fold & sig. in both	E2 vs DMSO	1.92116931383063	3.73761608791018e-07	Intron (ENST00000700989.1/105377940, intron 1 of 5)	11195	NA	LOC105377940	uncharacterized LOC105377940
chr6	112018991	112019508	*	+ 2 fold & sig. in both	E2 vs DMSO	1.33861522667567	1.79791222588445e-06	Distal Intergenic	-34567	ENSG00000112761	CCN6	cellular communication network factor 6
chr6	112243947	112244334	*	+ 2 fold & sig. in both	E2 vs DMSO	1.0940859188229	0.00353822567122683	Intron (ENST00000433684.6/101927640, intron 2 of 2)	7117	NA	LAMA4-AS1	LAMA4 antisense RNA 1
chr6	116073872	116074385	*	+ 2 fold & sig. in both	E2 vs DMSO	1.59335707981479	2.7540886161381e-06	Intron (ENST00000692859.2/2444, intron 1 of 1)	-12981	ENSG00000111816	FRK	fyn related Src family tyrosine kinase
chr6	116265090	116265673	*	+ 2 fold & sig. in both	E2 vs DMSO	1.12105718257073	0.000563070652591555	Intron (ENST00000430252.6/29940, intron 2 of 3)	10883	ENSG00000111817	DSE	dermatan sulfate epimerase
chr6	117545111	117545620	*	+ 2 fold & sig. in both	E2 vs DMSO	1.06398039412261	0.00247164104814891	3' UTR	841	ENSG00000164465	DCBLD1	discoidin, CUB and LCCL domain containing 1
chr6	119967821	119968448	*	+ 2 fold & sig. in both	E2 vs DMSO	1.70045239209093	2.84437423346684e-07	Distal Intergenic	-46731	ENSG00000265725	MIR3144	microRNA 3144
chr6	120141619	120142410	*	+ 2 fold & sig. in both	E2 vs DMSO	1.24327528630649	0.000442744895511295	Distal Intergenic	126440	ENSG00000265725	MIR3144	microRNA 3144
chr6	122620901	122621220	*	+ 2 fold & sig. in both	E2 vs DMSO	1.37597814847331	2.10264059370841e-05	Promoter	0	NA	NA	NA
chr6	122622536	122623112	*	+ 2 fold & sig. in both	E2 vs DMSO	1.19591925450174	0.000511230367272196	Intron (ENST00000615438.4/5570, intron 3 of 7)	-1522	NA	NA	NA
chr6	125124287	125124663	*	+ 2 fold & sig. in both	E2 vs DMSO	1.014519032816	0.0225510269169736	Intron (ENST00000534368.5/7164, intron 1 of 3)	5238	ENSG00000111907	TPD52L1	TPD52 like 1
chr6	125201935	125202582	*	+ 2 fold & sig. in both	E2 vs DMSO	1.02208262907147	1.0792615950713e-05	Intron (ENST00000534368.5/7164, intron 1 of 3)	-1057	ENSG00000111907	TPD52L1	TPD52 like 1
chr6	125558882	125559504	*	+ 2 fold & sig. in both	E2 vs DMSO	1.22539340465612	0.00101268706350253	Distal Intergenic	-113689	NA	LOC102723341	uncharacterized LOC102723341
chr6	125584434	125585119	*	+ 2 fold & sig. in both	E2 vs DMSO	1.46887628640396	2.67168604482601e-08	Intron (ENST00000656901.1/105377986, intron 3 of 3)	-89234	ENSG00000224506	LINC02523	long intergenic non-protein coding RNA 2523
chr6	125611772	125612214	*	+ 2 fold & sig. in both	E2 vs DMSO	1.48880803951923	0.00089284001911301	Intron (ENST00000656901.1/105377986, intron 3 of 3)	-62139	ENSG00000224506	LINC02523	long intergenic non-protein coding RNA 2523
chr6	125717418	125718649	*	+ 2 fold & sig. in both	E2 vs DMSO	1.03422938880841	3.6446367192812e-05	Exon (ENST00000423208.2/643623, exon 4 of 4)	15939	ENSG00000224506	LINC02523	long intergenic non-protein coding RNA 2523
chr6	125722911	125723311	*	+ 2 fold & sig. in both	E2 vs DMSO	1.24295912491362	0.00714052539258135	Intron (ENST00000656901.1/105377986, intron 1 of 3)	21432	ENSG00000224506	LINC02523	long intergenic non-protein coding RNA 2523
chr6	134117232	134117964	*	+ 2 fold & sig. in both	E2 vs DMSO	1.64506260669274	4.23926354788162e-08	Intron (ENST00000663785.1/124901404, intron 2 of 2)	43109	NA	NA	NA
chr6	134529840	134530316	*	+ 2 fold & sig. in both	E2 vs DMSO	1.27734485786009	1.02260718167892e-05	Intron (ENST00000650393.1/101928304, intron 5 of 8)	690	ENSG00000232310	LOC101928304	uncharacterized LOC101928304
chr6	13455569	13456014	*	+ 2 fold & sig. in both	E2 vs DMSO	1.3915760526636	0.00040965882992421	Intron (ENST00000379287.4/54438, intron 1 of 1)	16030	ENSG00000145990	GFOD1	glucose-fructose oxidoreductase domain containing 1
chr6	135211093	135211757	*	+ 2 fold & sig. in both	E2 vs DMSO	1.81817708322175	8.13490122321186e-08	Intron (ENST00000341911.10/4602, intron 15 of 15)	7876	ENSG00000118513	MYB	MYB proto-oncogene, transcription factor
chr6	135254407	135254859	*	+ 2 fold & sig. in both	E2 vs DMSO	1.48645544334191	1.43954902391959e-06	Distal Intergenic	15247	ENSG00000207689	MIR548A2	microRNA 548a-2
chr6	139530914	139531522	*	+ 2 fold & sig. in both	E2 vs DMSO	1.237371832513	1.42157744183846e-05	Intron (ENST00000647815.1/ENST00000647815.1, intron 1 of 2)	-56256	ENSG00000238099	LINC01625	long intergenic non-protein coding RNA 1625
chr6	139879941	139880338	*	+ 2 fold & sig. in both	E2 vs DMSO	1.83435100096081	2.43485809554105e-06	Distal Intergenic	23183	ENSG00000231426	FILNC1	FOXO induced long non-coding RNA 1
chr6	144131448	144131740	*	+ 2 fold & sig. in both	E2 vs DMSO	1.24810669929413	0.00760573192387281	Distal Intergenic	-8237	ENSG00000135604	STX11	syntaxin 11
chr6	144133123	144133631	*	+ 2 fold & sig. in both	E2 vs DMSO	1.22582510003136	0.00206506365768593	Distal Intergenic	-6346	ENSG00000135604	STX11	syntaxin 11
chr6	14732574	14733658	*	+ 2 fold & sig. in both	E2 vs DMSO	1.87652612125486	1.5725061905176e-09	Intron (ENST00000689305.1/ENST00000689305.1, intron 2 of 2)	-75755	NA	LOC101928354	uncharacterized LOC101928354
chr6	148633747	148634237	*	+ 2 fold & sig. in both	E2 vs DMSO	1.52492955724319	0.000100428158547166	Distal Intergenic	106482	ENSG00000111961	SASH1	SAM and SH3 domain containing 1
chr6	149846996	149847367	*	+ 2 fold & sig. in both	E2 vs DMSO	1.06338278310955	0.00305591275107577	Intron (ENST00000647612.1/84918, intron 10 of 14)	-5095	NA	NA	NA
chr6	15036520	15037425	*	+ 2 fold & sig. in both	E2 vs DMSO	1.62531814074676	7.08157502474597e-09	Intron (ENST00000653525.1/105374945, intron 2 of 3)	-14556	NA	LOC105374945	uncharacterized LOC105374945
chr6	15221636	15222519	*	+ 2 fold & sig. in both	E2 vs DMSO	2.33421385093012	2.38333990083885e-09	Distal Intergenic	-23550	ENSG00000008083	JARID2	jumonji and AT-rich interaction domain containing 2
chr6	15341400	15341914	*	+ 2 fold & sig. in both	E2 vs DMSO	1.20642800491873	0.00268134540506275	Intron (ENST00000341776.7/3720, intron 1 of 17)	92545	ENSG00000008083	JARID2	jumonji and AT-rich interaction domain containing 2
chr6	156827230	156827762	*	+ 2 fold & sig. in both	E2 vs DMSO	1.8978136743499	1.03670678512229e-06	Intron (ENST00000346085.10/57492, intron 2 of 20)	-1611	ENSG00000049618	ARID1B	AT-rich interaction domain 1B
chr6	158039544	158040085	*	+ 2 fold & sig. in both	E2 vs DMSO	1.16167595405108	0.000772874732909147	Intron (ENST00000355585.9/8871, intron 4 of 26)	6054	ENSG00000078269	SYNJ2	synaptojanin 2
chr6	163985658	163986257	*	+ 2 fold & sig. in both	E2 vs DMSO	1.1104728313706	0.000973310283487392	Intron (ENST00000659063.1/ENST00000659063.1, intron 1 of 1)	236940	NA	NA	NA
chr6	166691857	166692141	*	+ 2 fold & sig. in both	E2 vs DMSO	1.62994805253138	0.00327983148079206	Intron (ENST00000510118.5/6196, intron 3 of 22)	-63885	ENSG00000071242	RPS6KA2	ribosomal protein S6 kinase A2
chr6	16699259	16699733	*	+ 2 fold & sig. in both	E2 vs DMSO	1.50051496548845	0.000113622504744231	Intron (ENST00000244769.8/6310, intron 3 of 8)	50359	ENSG00000124788	ATXN1	ataxin 1
chr6	17472627	17473816	*	+ 2 fold & sig. in both	E2 vs DMSO	1.22064236265707	5.47579407202932e-06	Intron (ENST00000229922.7/10486, intron 4 of 12)	78895	ENSG00000112186	CAP2	cyclase associated actin cytoskeleton regulatory protein 2
chr6	18055564	18056260	*	+ 2 fold & sig. in both	E2 vs DMSO	1.21202403011256	4.38146111606786e-05	Distal Intergenic	66417	ENSG00000187566	NHLRC1	NHL repeat containing E3 ubiquitin protein ligase 1
chr6	1832755	1833378	*	+ 2 fold & sig. in both	E2 vs DMSO	1.30312839696012	0.000165989266211084	Intron (ENST00000530927.5/2762, intron 7 of 10)	97621	ENSG00000112699	GMDS	GDP-mannose 4,6-dehydratase
chr6	20693641	20694095	*	+ 2 fold & sig. in both	E2 vs DMSO	1.27294766351544	0.000380962452745019	Intron (ENST00000274695.8/54901, intron 5 of 15)	147300	ENSG00000145996	CDKAL1	CDK5 regulatory subunit associated protein 1 like 1
chr6	2132416	2132878	*	+ 2 fold & sig. in both	E2 vs DMSO	1.11499763019515	0.00091059894592027	Intron (ENST00000530927.5/2762, intron 1 of 10)	43113	ENSG00000112699	GMDS	GDP-mannose 4,6-dehydratase
chr6	23074158	23074793	*	+ 2 fold & sig. in both	E2 vs DMSO	1.16506457821339	0.00103326179210528	Distal Intergenic	-262918	NA	LOC102724749	uncharacterized LOC102724749
chr6	26296817	26297184	*	+ 2 fold & sig. in both	E2 vs DMSO	1.02672733803561	0.000295549383406039	Distal Intergenic	-11283	ENSG00000158406	H4C8	H4 clustered histone 8
chr6	31526051	31526742	*	+ 2 fold & sig. in both	E2 vs DMSO	1.01885683220061	0.00287478112644098	Distal Intergenic	-2220	ENSG00000204511	MCCD1	mitochondrial coiled-coil domain 1
chr6	33896441	33897396	*	+ 2 fold & sig. in both	E2 vs DMSO	1.97215598778771	1.08220909665507e-08	Promoter	0	ENSG00000249346	LINC01016	long intergenic non-protein coding RNA 1016
chr6	36118323	36118973	*	+ 2 fold & sig. in both	E2 vs DMSO	1.30901375141225	3.6380601293833e-07	Distal Intergenic	-8836	ENSG00000156711	MAPK13	mitogen-activated protein kinase 13
chr6	36122213	36122530	*	+ 2 fold & sig. in both	E2 vs DMSO	1.11835619230107	3.98147582068186e-05	Distal Intergenic	-5279	ENSG00000156711	MAPK13	mitogen-activated protein kinase 13
chr6	37056650	37057130	*	+ 2 fold & sig. in both	E2 vs DMSO	1.20988451820139	4.89766971237882e-05	Distal Intergenic	35108	ENSG00000146192	FGD2	FYVE, RhoGEF and PH domain containing 2
chr6	37059291	37059921	*	+ 2 fold & sig. in both	E2 vs DMSO	1.13487524140161	2.91828511617876e-06	Distal Intergenic	37749	ENSG00000146192	FGD2	FYVE, RhoGEF and PH domain containing 2
chr6	37164535	37165023	*	+ 2 fold & sig. in both	E2 vs DMSO	1.06544264451646	8.19863809434122e-05	Distal Intergenic	-5129	ENSG00000137193	PIM1	Pim-1 proto-oncogene, serine/threonine kinase
chr6	37630277	37630693	*	+ 2 fold & sig. in both	E2 vs DMSO	1.03118250845015	0.03023834320782	3' UTR	9131	ENSG00000112139	MDGA1	MAM domain containing glycosylphosphatidylinositol anchor 1
chr6	38437056	38437372	*	+ 2 fold & sig. in both	E2 vs DMSO	1.46691076504086	0.00373158737599924	Intron (ENST00000314100.10/114781, intron 5 of 9)	-44320	ENSG00000226533	BTBD9-AS1	BTBD9 antisense RNA 1
chr6	38443750	38444120	*	+ 2 fold & sig. in both	E2 vs DMSO	1.46871111914574	0.00046481237891613	Intron (ENST00000314100.10/114781, intron 5 of 9)	-37572	ENSG00000226533	BTBD9-AS1	BTBD9 antisense RNA 1
chr6	43910709	43911028	*	+ 2 fold & sig. in both	E2 vs DMSO	1.25317888026392	0.000217948489598142	Intron (ENST00000691600.1/100132354, intron 1 of 1)	19664	NA	LINC01512	long intergenic non-protein coding RNA 1512
chr6	44110260	44110742	*	+ 2 fold & sig. in both	E2 vs DMSO	1.2344986788002	7.91235268081953e-05	Distal Intergenic	-16172	ENSG00000137216	TMEM63B	transmembrane protein 63B
chr6	45507123	45507550	*	+ 2 fold & sig. in both	E2 vs DMSO	1.57118146807828	0.000470566385274911	Intron (ENST00000483377.5/860, intron 5 of 7)	69220	NA	RUNX2-AS1	RUNX2 antisense RNA 1
chr6	45554700	45554998	*	+ 2 fold & sig. in both	E2 vs DMSO	1.68262852146829	0.000176735217067149	Intron (ENST00000576263.5/860, intron 6 of 6)	21772	NA	RUNX2-AS1	RUNX2 antisense RNA 1
chr6	45675659	45676104	*	+ 2 fold & sig. in both	E2 vs DMSO	1.41126830379565	0.00096502353370118	Distal Intergenic	-98889	NA	RUNX2-AS1	RUNX2 antisense RNA 1
chr6	53236561	53237011	*	+ 2 fold & sig. in both	E2 vs DMSO	1.07858166534085	0.0131999207409276	Distal Intergenic	-39982	ENSG00000264056	MIR5685	microRNA 5685
chr6	6739897	6740263	*	+ 2 fold & sig. in both	E2 vs DMSO	1.61596477387765	0.000878502026567028	Promoter	-547	NA	LOC101928004	uncharacterized LOC101928004
chr6	6741279	6741582	*	+ 2 fold & sig. in both	E2 vs DMSO	1.42919464938934	0.000178264821296767	Intron (ENST00000689004.1/101928004, intron 2 of 4)	-1929	NA	LOC101928004	uncharacterized LOC101928004
chr6	6748484	6748933	*	+ 2 fold & sig. in both	E2 vs DMSO	1.10113581437226	0.000142486585104299	Intron (ENST00000689004.1/101928004, intron 1 of 4)	-9134	NA	LOC101928004	uncharacterized LOC101928004
chr6	6856535	6857658	*	+ 2 fold & sig. in both	E2 vs DMSO	1.60028275915525	2.17280548181923e-08	Distal Intergenic	-55349	NA	LOC101928004	uncharacterized LOC101928004
chr6	6881721	6882272	*	+ 2 fold & sig. in both	E2 vs DMSO	1.02387070503816	0.00157587661082868	Distal Intergenic	-80535	NA	LOC101928004	uncharacterized LOC101928004
chr6	7219380	7219805	*	+ 2 fold & sig. in both	E2 vs DMSO	1.27630590045213	0.00069453557134052	Intron (ENST00000379933.7/6239, intron 8 of 11)	80135	ENSG00000124782	RREB1	ras responsive element binding protein 1
chr6	80696278	80696726	*	+ 2 fold & sig. in both	E2 vs DMSO	1.24309487760042	0.00369521642023192	Distal Intergenic	243079	ENSG00000083123	BCKDHB	branched chain keto acid dehydrogenase E1 subunit beta
chr6	92900138	92900755	*	+ 2 fold & sig. in both	E2 vs DMSO	1.0082550745036	0.00011480606342272	Distal Intergenic	109685	NA	NA	NA
chr6	9496575	9497402	*	+ 2 fold & sig. in both	E2 vs DMSO	1.18422700237462	8.46488814242506e-06	Distal Intergenic	271981	NA	NA	NA
chr6	9521992	9522410	*	+ 2 fold & sig. in both	E2 vs DMSO	1.29948456910152	0.00162268313101577	Distal Intergenic	297398	NA	NA	NA
chr7	101944771	101945310	*	+ 2 fold & sig. in both	E2 vs DMSO	1.58603447430756	1.50128991298738e-07	Intron (ENST00000437600.9/1523, intron 2 of 22)	12428	ENSG00000257923	CUX1	cut like homeobox 1
chr7	101972630	101973512	*	+ 2 fold & sig. in both	E2 vs DMSO	1.73275683889692	5.76698178439061e-08	Intron (ENST00000437600.9/1523, intron 2 of 22)	13240	ENSG00000257923	CUX1	cut like homeobox 1
chr7	102004050	102004527	*	+ 2 fold & sig. in both	E2 vs DMSO	2.05778299347448	1.08220909665507e-08	Intron (ENST00000437600.9/1523, intron 2 of 22)	44660	ENSG00000257923	CUX1	cut like homeobox 1
chr7	104224383	104224763	*	+ 2 fold & sig. in both	E2 vs DMSO	1.06519611573683	0.0152019644272852	Distal Intergenic	-16336	ENSG00000164815	ORC5	origin recognition complex subunit 5
chr7	105639808	105640460	*	+ 2 fold & sig. in both	E2 vs DMSO	1.80464116976299	1.47134507749379e-06	Intron (ENST00000419735.8/222255, intron 5 of 11)	-15542	ENSG00000146776	ATXN7L1	ataxin 7 like 1
chr7	105887653	105888368	*	+ 2 fold & sig. in both	E2 vs DMSO	1.1574292166786	7.63662748017122e-05	Intron (ENST00000487084.1/ENST00000487084.1, intron 1 of 1)	10549	ENSG00000128536	CDHR3	cadherin related family member 3
chr7	112084704	112085091	*	+ 2 fold & sig. in both	E2 vs DMSO	1.2058086546113	0.00715533624564048	Intron (ENST00000428084.6/9732, intron 1 of 52)	-80573	ENSG00000128512	DOCK4	dedicator of cytokinesis 4
chr7	116417798	116418529	*	+ 2 fold & sig. in both	E2 vs DMSO	1.04434103296369	0.00214452729695291	Intron (ENST00000477018.5/105375463, intron 7 of 10)	46747	NA	LOC107986838	uncharacterized LOC107986838
chr7	130894189	130894581	*	+ 2 fold & sig. in both	E2 vs DMSO	1.12457816697083	0.000535393429158321	Intron (ENST00000447430.1/100506860, intron 2 of 4)	-9771	ENSG00000231721	LINC-PINT	long intergenic non-protein coding RNA, p53 induced transcript
chr7	130942107	130942465	*	+ 2 fold & sig. in both	E2 vs DMSO	1.22802816797194	0.000485393777039945	Promoter	-523	NA	LOC105375509	uncharacterized LOC105375509
chr7	131625698	131626169	*	+ 2 fold & sig. in both	E2 vs DMSO	1.24347884715485	3.35541756286101e-06	Distal Intergenic	-67481	ENSG00000128567	PODXL	podocalyxin like
chr7	139651429	139651656	*	+ 2 fold & sig. in both	E2 vs DMSO	1.16466425017157	0.0136000289000432	Intron (ENST00000406875.8/28996, intron 2 of 14)	65357	ENSG00000064393	HIPK2	homeodomain interacting protein kinase 2
chr7	139745690	139746108	*	+ 2 fold & sig. in both	E2 vs DMSO	1.09895997824382	0.00474759216811411	Intron (ENST00000406875.8/28996, intron 1 of 14)	-28677	ENSG00000064393	HIPK2	homeodomain interacting protein kinase 2
chr7	139771015	139771762	*	+ 2 fold & sig. in both	E2 vs DMSO	1.16703608398276	9.11163202771027e-06	Intron (ENST00000406875.8/28996, intron 1 of 14)	-5289	ENSG00000059377	TBXAS1	thromboxane A synthase 1
chr7	140310135	140310705	*	+ 2 fold & sig. in both	E2 vs DMSO	1.0502895573449	0.000337589308334757	Intron (ENST00000477571.5/84255, intron 13 of 15)	27120	ENSG00000157800	SLC37A3	solute carrier family 37 member 3
chr7	142352643	142353398	*	+ 2 fold & sig. in both	E2 vs DMSO	1.93357470792304	6.59274683767258e-07	5' UTR	-80408	ENSG00000186163	PRSS59P	serine protease 59, pseudogene
chr7	142356013	142356734	*	+ 2 fold & sig. in both	E2 vs DMSO	1.21070441033925	5.7078591457157e-06	Distal Intergenic	-83778	ENSG00000186163	PRSS59P	serine protease 59, pseudogene
chr7	142384146	142384997	*	+ 2 fold & sig. in both	E2 vs DMSO	2.03424401197002	1.6122885239543e-08	5' UTR	-111911	ENSG00000186163	PRSS59P	serine protease 59, pseudogene
chr7	150428725	150429229	*	+ 2 fold & sig. in both	E2 vs DMSO	1.12491384629394	0.0175260040096696	Distal Intergenic	-4425	ENSG00000242258	LINC00996	long intergenic non-protein coding RNA 996
chr7	151694762	151695706	*	+ 2 fold & sig. in both	E2 vs DMSO	1.31244528504169	2.17237364008356e-07	Intron (ENST00000287878.9/51422, intron 3 of 15)	40472	ENSG00000106617	PRKAG2	protein kinase AMP-activated non-catalytic subunit gamma 2
chr7	152574886	152575800	*	+ 2 fold & sig. in both	E2 vs DMSO	2.41555528478983	2.52034888617612e-09	Distal Intergenic	-33513	NA	NA	NA
chr7	155368958	155370262	*	+ 2 fold & sig. in both	E2 vs DMSO	1.74542843802671	3.2167933128092e-07	Distal Intergenic	-1024	ENSG00000204960	BLACE	B cell acute lymphoblastic leukemia expressed
chr7	156102630	156103033	*	+ 2 fold & sig. in both	E2 vs DMSO	1.24015653048893	0.000165231205936917	Distal Intergenic	-68066	NA	NA	NA
chr7	156516005	156516980	*	+ 2 fold & sig. in both	E2 vs DMSO	1.22039781910046	1.03270865617342e-05	Intron (ENST00000651649.1/100506380, intron 2 of 4)	-23511	ENSG00000279418	LINC00244	long intergenic non-protein coding RNA 244
chr7	156725134	156725488	*	+ 2 fold & sig. in both	E2 vs DMSO	1.16109525808926	0.0122005491233737	3' UTR	615	ENSG00000105983	LMBR1	limb development membrane protein 1
chr7	157255156	157255677	*	+ 2 fold & sig. in both	E2 vs DMSO	1.14216182858896	0.000300898044312673	Intron (ENST00000348165.10/9690, intron 21 of 22)	-1010	ENSG00000009335	UBE3C	ubiquitin protein ligase E3C
chr7	157373561	157373940	*	+ 2 fold & sig. in both	E2 vs DMSO	1.21640473334541	0.0046671055626713	Intron (ENST00000441561.5/10049, intron 7 of 7)	-4185	ENSG00000105993	DNAJB6	DnaJ heat shock protein family (Hsp40) member B6
chr7	16880521	16880994	*	+ 2 fold & sig. in both	E2 vs DMSO	1.42612753227658	2.95811444955659e-06	Intron (ENST00000310398.7/155465, intron 1 of 7)	979	ENSG00000173467	AGR3	anterior gradient 3, protein disulphide isomerase family member
chr7	17022982	17023314	*	+ 2 fold & sig. in both	E2 vs DMSO	1.21732663346961	0.00426569986443853	Intron (ENST00000645559.1/107986772, intron 1 of 1)	32764	NA	LOC105375170	uncharacterized LOC105375170
chr7	1936812	1937524	*	+ 2 fold & sig. in both	E2 vs DMSO	1.06306969939362	0.00564177545539613	5' UTR	3025	ENSG00000002822	MAD1L1	mitotic arrest deficient 1 like 1
chr7	25025215	25025604	*	+ 2 fold & sig. in both	E2 vs DMSO	1.18482034309078	0.0188878440544392	Distal Intergenic	-43581	ENSG00000070882	OSBPL3	oxysterol binding protein like 3
chr7	26558434	26558872	*	+ 2 fold & sig. in both	E2 vs DMSO	2.49415489651944	7.94103596316659e-08	Exon (ENST00000660447.1/100506289, exon 3 of 3)	6595	ENSG00000233760	LOC100506289	uncharacterized LOC100506289
chr7	2688679	2689564	*	+ 2 fold & sig. in both	E2 vs DMSO	1.34637540355469	6.85887803055578e-07	Promoter	477	ENSG00000174945	AMZ1	archaelysin family metallopeptidase 1
chr7	27277426	27278092	*	+ 2 fold & sig. in both	E2 vs DMSO	1.36153939637086	2.04103988331067e-07	Distal Intergenic	-30197	ENSG00000253405	EVX1-AS	EVX1 antisense RNA
chr7	2810941	2811527	*	+ 2 fold & sig. in both	E2 vs DMSO	1.67990235114084	6.38097970995624e-07	Intron (ENST00000275364.8/2768, intron 1 of 3)	3731	ENSG00000146535	GNA12	G protein subunit alpha 12
chr7	3267854	3268365	*	+ 2 fold & sig. in both	E2 vs DMSO	1.11096197646239	0.000771996610350326	Intron (ENST00000437354.1/105375132, intron 1 of 1)	-32887	ENSG00000146555	SDK1	sidekick cell adhesion molecule 1
chr7	34069590	34070019	*	+ 2 fold & sig. in both	E2 vs DMSO	1.41833582551142	9.79999891622312e-05	Intron (ENST00000297161.6/168667, intron 12 of 15)	2358	ENSG00000164619	BMPER	BMP binding endothelial regulator
chr7	36272752	36273408	*	+ 2 fold & sig. in both	E2 vs DMSO	1.02643466621585	1.90925428632911e-05	Intron (ENST00000242108.9/80820, intron 3 of 7)	-7675	ENSG00000122547	EEPD1	endonuclease/exonuclease/phosphatase family domain containing 1
chr7	41054870	41055521	*	+ 2 fold & sig. in both	E2 vs DMSO	1.78055020514079	5.6717472705839e-08	Distal Intergenic	-34018	ENSG00000224017	LINC01449	long intergenic non-protein coding RNA 1449
chr7	43302179	43302710	*	+ 2 fold & sig. in both	E2 vs DMSO	1.44608651997389	3.6446367192812e-05	Intron (ENST00000490954.2/23072, intron 1 of 1)	-52911	NA	NA	NA
chr7	43873401	43873655	*	+ 2 fold & sig. in both	E2 vs DMSO	1.19811326441944	0.0177540394864704	Intron (ENST00000603700.1/100534592, intron 4 of 6)	-3508	ENSG00000062582	MRPS24	mitochondrial ribosomal protein S24
chr7	45237757	45238241	*	+ 2 fold & sig. in both	E2 vs DMSO	2.00768804531514	1.83605262554167e-07	Distal Intergenic	79928	ENSG00000122679	RAMP3	receptor activity modifying protein 3
chr7	48311383	48312046	*	+ 2 fold & sig. in both	E2 vs DMSO	1.53036622911956	1.5932267659831e-07	Intron (ENST00000435803.6/154664, intron 24 of 61)	-1021	ENSG00000179869	ABCA13	ATP binding cassette subfamily A member 13
chr7	51356867	51357512	*	+ 2 fold & sig. in both	E2 vs DMSO	1.20895120712956	6.4718736144581e-05	Distal Intergenic	-40049	ENSG00000106078	COBL	cordon-bleu WH2 repeat protein
chr7	66015976	66016418	*	+ 2 fold & sig. in both	E2 vs DMSO	1.30004585942857	5.06799076203323e-05	Distal Intergenic	15126	NA	LOC105375336	uncharacterized LOC105375336
chr7	66307641	66307961	*	+ 2 fold & sig. in both	E2 vs DMSO	1.03520416800367	0.00814664815150107	Intron (ENST00000480281.5/8460, intron 2 of 4)	-44543	ENSG00000169902	TPST1	tyrosylprotein sulfotransferase 1
chr7	73891176	73891908	*	+ 2 fold & sig. in both	E2 vs DMSO	1.09239873141208	0.000301655312755254	Distal Intergenic	30004	ENSG00000175877	TMEM270	transmembrane protein 270
chr7	81167843	81168576	*	+ 2 fold & sig. in both	E2 vs DMSO	1.03670261992908	4.5134148638004e-05	Distal Intergenic	-245484	ENSG00000075223	SEMA3C	semaphorin 3C
chr7	85426475	85427187	*	+ 2 fold & sig. in both	E2 vs DMSO	1.03502694584593	0.0171706715223624	Intron (ENST00000438065.1/105375380, intron 1 of 3)	5353	ENSG00000225128	LINC00972	long intergenic non-protein coding RNA 972
chr7	89123854	89124528	*	+ 2 fold & sig. in both	E2 vs DMSO	1.01977318578509	2.21900514450825e-05	Intron (ENST00000333190.5/219578, intron 1 of 3)	-93626	ENSG00000182348	ZNF804B	zinc finger protein 804B
chr7	98826615	98827198	*	+ 2 fold & sig. in both	E2 vs DMSO	1.0117117284728	3.62207807517188e-05	Distal Intergenic	39748	ENSG00000166448	TMEM130	transmembrane protein 130
chr7	99072935	99073201	*	+ 2 fold & sig. in both	E2 vs DMSO	1.14681437463596	0.0326091654359583	Intron (ENST00000361368.7/57154, intron 1 of 17)	8226	ENSG00000198742	SMURF1	SMAD specific E3 ubiquitin protein ligase 1
chr8	101120568	101121086	*	+ 2 fold & sig. in both	E2 vs DMSO	2.40527716925987	1.36261120216801e-08	Distal Intergenic	5072	NA	LOC105375674	uncharacterized LOC105375674
chr8	101462693	101463077	*	+ 2 fold & sig. in both	E2 vs DMSO	1.16369473091113	0.000252494658554716	Intron (ENST00000520268.1/ENST00000520268.1, intron 1 of 1)	-29362	ENSG00000083307	GRHL2	grainyhead like transcription factor 2
[truncated: 278 more rows]
